# Supplementary material
Source: PubMed Central journal article supplement (PMC10812122)

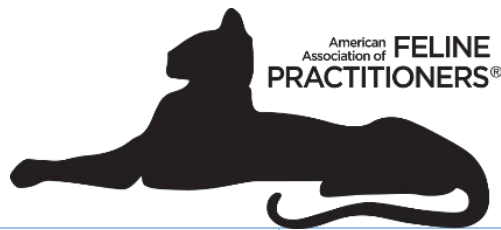

| <b>2021 AAFC Feline Senior Care Guidelines</b>                                            | <b>Guía del Cuidado del Gato Mayor de AAFC 2021</b>                                       |
|-------------------------------------------------------------------------------------------|-------------------------------------------------------------------------------------------|
| Michael Ray<br>DVM                                                                        | Michael Ray<br>DVM                                                                        |
| Hazel C Carney<br>DVM, MS, DABVP                                                          | Hazel C Carney<br>DVM, MS, DABVP                                                          |
| Beth Boynton<br>DVM                                                                       | Beth Boynton<br>DVM                                                                       |
| Jessica Quimby<br>DVM, PhD, DACVIM                                                        | Jessica Quimby<br>DVM, PhD, DACVIM                                                        |
| Sheilah Robertson<br>BVMS (Hons), PhD,<br>DACVAA, DECVAA, DACAW, DECAWBM (WSEL),<br>MRCVS | Sheilah Robertson<br>BVMS (Hons), PhD,<br>DACVAA, DECVAA, DACAW, DECAWBM (WSEL),<br>MRCVS |
| Kelly St Denis<br>MSc, DVM, DABVP (Feline)                                                | Kelly St Denis<br>MSc, DVM, DABVP (Felino)                                                |
| Helen Tuzio<br>DVM, DABVP (Feline), CVA                                                   | Helen Tuzio<br>DVM, DABVP (Felino), CVA                                                   |
| Bonnie Wright<br>DVM, DACVAA                                                              | Bonnie Wright<br>DVM, DACVAA                                                              |
| <i>Journal of Feline Medicine and Surgery</i> (2021)<br><b>23</b> , 613–638               | <i>Journal of Feline Medicine and Surgery</i> (2021)<br><b>23</b> , 613–638               |
| DOI: 10.1177/ 1098612X211021538                                                           | DOI: 10.1177/ 1098612X211021538                                                           |

## Abstract

The '2021 AAFP Feline Senior Care Guidelines' are authored by a Task Force of experts in feline clinical medicine and serve as an update and extension of those published in 2009. They emphasize the individual patient evaluation and the process of aging, with references to other

feline practice guidelines for a more complete discussion of specific diseases. Focusing on each cat encourages and empowers the owner to become a part of the cat's care every step of the way. A comprehensive discussion during the physical examination and history taking allows for tailoring the approach to both the cat and the family involved in the care. Videos and analysis of serial historical measurements are brought into the assessment of each patient. These Guidelines introduce the emerging concept of frailty, with a description and methods of its incorporation into the senior cat assessment. Minimum database diagnostics are discussed, along with recommendations for additional investigative considerations. For example, blood pressure assessment is included as a minimum diagnostic procedure in both apparently healthy and ill cats. Cats age at a much faster rate than humans, so practical timelines for testing frequency are included and suggest an increased frequency of diagnostics with advancing age. The importance of nutrition, as well as senior cat nutritional needs and deficiencies, is considered. Pain is highlighted as its own syndrome, with an emphasis on consideration in every senior cat. The Task Force discusses anesthesia, along with strategies to allow aging cats to be safely anesthetized well into their senior years. The medical concept of quality of life is addressed with the latest information available in veterinary medicine. This includes end of life considerations like palliative and hospice care, as well as recommendations on the establishment of 'budgets of care', which greatly influence what can be done for the individual cat. Acknowledgement is given that each cat owner will be different in this regard; and establishing what is reasonable and practical for the individual owner is important. A discussion on euthanasia offers some recommendations to help the owner make a decision that reflects the best interests of the individual cat.

## Keywords:

Senior; frailty; comorbidities; quality of life; sarcopenia; blood pressure; pain; hypertension; chronic kidney disease; hyperthyroidism;

## Abstracto

La "Guía del Cuidado del Gato Mayor de AAFP 2021" está redactada por un grupo de trabajo de expertos en medicina clínica felina y sirve como una actualización y extensión de las publicadas en 2009. Estas enfatizan la evaluación individual del paciente y el proceso de envejecimiento, con referencias a otras guías de práctica felina para una discusión más completa de enfermedades específicas. Enfocarse en cada gato alienta y capacita al dueño para que se convierta en parte del cuidado del gato en cada paso del camino. Una discusión exhaustiva durante el examen físico y la historia clínica permite adaptar el enfoque tanto al gato como a la familia involucrada en el cuidado. Los videos y el análisis de las mediciones del historial médico en serie se incorporan a la evaluación de cada paciente. Estas directrices introducen el concepto emergente de fragilidad, con una descripción y métodos para su incorporación en la evaluación de gatos mayores. Se discuten los diagnósticos mínimos de la base de datos, junto con recomendaciones para consideraciones de investigación adicionales. Por ejemplo, la evaluación de la presión arterial se incluye como un procedimiento de diagnóstico mínimo tanto en gatos aparentemente sanos como enfermos. Los gatos envejecen a un ritmo mucho más rápido que los humanos, por lo que se incluyen plazos prácticos para la frecuencia de las pruebas y sugieren una mayor frecuencia de diagnósticos con el avance de la edad. Se considera la importancia de la nutrición, así como las necesidades y deficiencias nutricionales de los gatos mayores. El dolor se destaca como su propio síndrome, con énfasis en la consideración en cada gato mayor. El grupo de trabajo discute la anestesia, junto con las estrategias para permitir que los gatos ancianos sean anestesiados de manera segura hasta bien entrada la vejez. El concepto médico de calidad de vida se aborda con la última información disponible en medicina veterinaria. Esto incluye consideraciones para el final de la vida, como cuidados paliativos y de hospicio, así como recomendaciones sobre el establecimiento de "presupuestos de cuidados", que influyen en gran medida en lo que se puede hacer por cada gato. Se reconoce que cada dueño de gato será diferente en este sentido; y es importante establecer lo que es razonable y práctico para el propietario individual. Una discusión sobre la eutanasia ofrece algunas recomendaciones para ayudar al dueño o a tomar una decisión que refleje los mejores intereses de cada gato.

## Palabras claves:

Mayor; fragilidad; comorbilidades; calidad de vida; sarcopenia; presión sanguínea; dolor; hipertensión; enfermedad renal crónica; hipertiroidismo; osteoartritis; enfermedad degenerativa de las

|                                                                                                                                                                                                                                                                                                                                                                                                                                                                                                                                                                                                                                                                                                                                                                                                                                                                                                                                                                            |                                                                                                                                                                                                                                                                                                                                                                                                                                                                                                                                                                                                                                                                                                                                                                                                                                                                                                                                                                                                                                                                          |
|----------------------------------------------------------------------------------------------------------------------------------------------------------------------------------------------------------------------------------------------------------------------------------------------------------------------------------------------------------------------------------------------------------------------------------------------------------------------------------------------------------------------------------------------------------------------------------------------------------------------------------------------------------------------------------------------------------------------------------------------------------------------------------------------------------------------------------------------------------------------------------------------------------------------------------------------------------------------------|--------------------------------------------------------------------------------------------------------------------------------------------------------------------------------------------------------------------------------------------------------------------------------------------------------------------------------------------------------------------------------------------------------------------------------------------------------------------------------------------------------------------------------------------------------------------------------------------------------------------------------------------------------------------------------------------------------------------------------------------------------------------------------------------------------------------------------------------------------------------------------------------------------------------------------------------------------------------------------------------------------------------------------------------------------------------------|
| <p>osteoarthritis; degenerative joint disease; diabetes mellitus; anesthesia; gastrointestinal disease; dental disease; cancer; cognitive dysfunction syndrome; end of life; palliative care; hospice care; budgets of care; euthanasia</p>                                                                                                                                                                                                                                                                                                                                                                                                                                                                                                                                                                                                                                                                                                                                | <p>articulaciones; diabetes mellitus; anestesia; enfermedad gastrointestinal; enfermedad dental; cáncer; síndrome de disfunción cognitiva; fin de la vida; Cuidados paliativos; cuidado de hospicio; presupuestos de atención; eutanasia</p>                                                                                                                                                                                                                                                                                                                                                                                                                                                                                                                                                                                                                                                                                                                                                                                                                             |
| <div style="background-color: #d9ead3; padding: 5px; border: 1px solid #d9ead3;"> <p>Frailty is a syndrome, more common with advancing age, in which the patient has a decreased functional reserve that leads to a decline in physiologic and cognitive performance and a greater vulnerability to adverse medical outcomes.</p> </div>                                                                                                                                                                                                                                                                                                                                                                                                                                                                                                                                                                                                                                   | <p>La fragilidad es un síndrome, más común con la edad avanzada, en el cual el paciente tiene una reserva funcional disminuida que conduce a una disminución del rendimiento fisiológico y cognitivo y una mayor vulnerabilidad a los resultados médicos adversos.</p>                                                                                                                                                                                                                                                                                                                                                                                                                                                                                                                                                                                                                                                                                                                                                                                                   |
| <p><b>ABBREVIATIONS</b></p> <ul style="list-style-type: none"> <li>* BCS (body condition score)</li> <li>* BP (blood pressure)</li> <li>* CDS (cognitive dysfunction syndrome)</li> <li>* CKD (chronic kidney disease)</li> <li>* DER (daily energy requirements)</li> <li>* DJD (degenerative joint disease)</li> <li>* DM (diabetes mellitus)</li> <li>* FHT (feline hyperthyroidism)</li> <li>* GI (gastrointestinal)</li> <li>* GFR (glomerular filtration rate)</li> <li>* HRQOL (health-related quality of life)</li> <li>* IBD (inflammatory bowel disease)</li> <li>* MCS (muscle condition score)</li> <li>* NSAID (non-steroidal anti-inflammatory drug)</li> <li>* QOL (quality of life)</li> <li>* RER (resting energy requirements)</li> <li>* SDMA (symmetric dimethylarginine)</li> <li>* T4 (thyroid hormone)</li> <li>* UPCR (urine protein:creatinine ratio)</li> <li>* USG (urine specific gravity)</li> <li>* UTI (urinary tract infection)</li> </ul> | <p><b>ABREVIATURAS</b></p> <ul style="list-style-type: none"> <li>* BCS (puntuación de la condición corporal)</li> <li>* BP (presión arterial)</li> <li>* SDC (síndrome de disfunción cognitiva)</li> <li>* ERC (enfermedad renal crónica)</li> <li>* RED (requerimientos energéticos diarios)</li> <li>* DJD (enfermedad degenerativa de las articulaciones)</li> <li>* DM (diabetes mellitus)</li> <li>* HT (hipertiroidismo felino)</li> <li>* GI (gastrointestinal)</li> <li>* TFG (tasa de filtración glomerular)</li> <li>* CVRS (calidad relacionada con la salud de vida)</li> <li>* EII (enfermedad inflamatoria intestinal)</li> <li>* MCS (puntuación de condición muscular)</li> <li>* AINE (antiinflamatorio no esteroide)</li> <li>* CV (calidad de vida)</li> <li>* RER (requisitos de energía en reposo)</li> <li>* ADMA (dimetilarginina simétrica)</li> <li>* T4 (hormona tiroidea)</li> <li>* UPCR (relación proteína en orina: creatinina)</li> <li>* SG (gravedad específica de la orina)</li> <li>* ITU (infección del tracto urinario)</li> </ul> |

| <b>Introduction</b>                                                                                                                                                                                                                                                                                                                                                                                                                                                                                                                                                                                                                                     | <b>Introducción</b>                                                                                                                                                                                                                                                                                                                                                                                                                                                                                                                                                                                                                                                                                                                                              |
|---------------------------------------------------------------------------------------------------------------------------------------------------------------------------------------------------------------------------------------------------------------------------------------------------------------------------------------------------------------------------------------------------------------------------------------------------------------------------------------------------------------------------------------------------------------------------------------------------------------------------------------------------------|------------------------------------------------------------------------------------------------------------------------------------------------------------------------------------------------------------------------------------------------------------------------------------------------------------------------------------------------------------------------------------------------------------------------------------------------------------------------------------------------------------------------------------------------------------------------------------------------------------------------------------------------------------------------------------------------------------------------------------------------------------------|
| <p>Since the publication of the ‘AAFP Senior Care Guidelines’ in 2009,<sup>1</sup> our knowledge has advanced significantly, and today’s cat owners expect a higher level of care. In human medicine, gerontology has insufficient specialists for multiple reasons. In feline medicine, most of us love caring for older cats; they are often our favorite patients. We could likely fill a feline gerontology specialty with enthusiastic veterinarians. In response to recent advancements and an increased interest in senior feline medicine, we present updated guidance in these ‘2021 AAFP Feline Senior Care Guidelines’.</p>                  | <p>Desde la publicación del “Guía del Cuidado del Gato Mayor de AAFP 2021” en 2009,<sup>1</sup> nuestro conocimiento ha avanzado significativamente y los dueños de gatos de hoy esperan un mayor nivel de cuidado. En medicina humana, la gerontología tiene insuficientes especialistas por múltiples razones. En la medicina felina, a la mayoría de nosotros nos encanta cuidar a los gatos mayores; a menudo son nuestros pacientes favoritos. Probablemente podríamos llenar una especialidad de gerontología felina con veterinarios entusiastas. En respuesta a los avances recientes y un mayor interés en la medicina felina de gatos mayores, presentamos una guía actualizada en esta “Guía del Cuidado del Gato Mayor de AAFP 2021”.</p>            |
| <p>We consider ‘senior’ to be a term that describes age. While senior is defined as over 10 years of age in the ‘2021 AAHA/AAFP Feline Life Stage Guidelines’,<sup>2</sup> some cats may be more appropriately referred to as senior as early as 8 years of age, possibly sooner for some breeds or those with genetic predispositions.<sup>3,4</sup> The Task Force feels that ‘geriatric’ is more a statement of health status, and has no specifically associated age. The Task Force also acknowledges the newer concept of ‘frailty,’ which plays a huge role in the care of older humans and is becoming more significant in feline medicine.</p> | <p>Consideramos que "mayor" es un término que describe la edad. Mientras que un gato mayor se define como mayor de 10 años en la “Guía de la etapa de vida felina de la AAHA / AAFP de 2021”,<sup>2</sup> algunos gatos pueden ser referidos de manera más apropiada como mayores a los 8 años de edad, posiblemente antes para algunas razas o aquellos con predisposiciones genéticas.<sup>3,4</sup> El grupo de trabajo considera que "geriátrico" es más una declaración del estado de salud y no tiene específicamente asociado con la edad. El grupo de trabajo también reconoce el concepto más nuevo de "fragilidad", que juega un papel muy importante en el cuidado de los gatos mayores y se está volviendo más importante en la medicina felina.</p> |

This Guidelines document concentrates on the feline examination and owner consultation, which together provide the best understanding of each cat's needs. It emphasizes that owner involvement in the assessment of a senior cat is crucial and impacts our interpretation of clinical findings. Although we briefly discuss individual diseases, our focus stays on individual patients and how their aging process influences their wellbeing. We discuss the common occurrence of comorbidities and how they bring complexity to senior care. We also want to emphasize that senior cats are often dealing with one or more sources of chronic pain. The Task Force proposes that pain be thought of as a disease itself that can greatly influence quality of life. Moreover, because teaching cat owners how to improve quality of life for these patients is the number one priority, we offer practical solutions to multifactorial health situations. Challenging scenarios include end of life care with the interactions of hospice, euthanasia, and an acknowledgment of possible burdens on the cat owner.

To best meet these demands, we encourage veterinarians to look more closely at the aging process, not just the individual diagnosis. Ultimately, we hope to augment the knowledge of older cats for both owners and veterinarians, and increase the level of senior cat veterinary care.

Este documento de guía se concentra en el examen felino y la consulta al propietario, que en conjunto brindan la mejor comprensión de las necesidades de cada gato. Se enfatiza que la participación del propietario en la evaluación de un gato mayor es crucial e impacta nuestra interpretación de los hallazgos clínicos. Aunque discutimos brevemente las enfermedades individuales, nuestro enfoque permanece en pacientes individuales y cómo su proceso de envejecimiento influye en su bienestar. Discutimos la ocurrencia común de comorbilidades y cómo aportan complejidad a la atención de personas mayores. También queremos enfatizar que los gatos mayores a menudo se enfrentan a una o más fuentes de dolor crónico. El grupo de trabajo propone que se considere el dolor como una enfermedad en sí misma que puede influir en gran medida en la calidad de vida. Además, debido a que la prioridad número uno es enseñar a los dueños de gatos cómo mejorar la calidad de vida de estos pacientes, ofrecemos soluciones prácticas para situaciones de salud multifactoriales. Los escenarios desafiantes incluyen el cuidado al final de la vida con las interacciones del hospicio, la eutanasia y el reconocimiento de las posibles cargas para el dueño del gato.

Para satisfacer mejor estas demandas, alentamos a los veterinarios a observar más de cerca el proceso de envejecimiento, no solo el diagnóstico individual. Por último, esperamos aumentar el conocimiento de los gatos mayores tanto para los dueños como para los veterinarios, y aumentar el nivel de atención veterinaria de gatos mayores.

|                                                                                                                                                                                                                                                                                                                                                                                                                                                                                                                                                                                                                                                                                                                                                                                                               |                                                                                                                                                                                                                                                                                                                                                                                                                                                                                                                                                                                                                                                                                                                                                                                                                                                                                                                                       |
|---------------------------------------------------------------------------------------------------------------------------------------------------------------------------------------------------------------------------------------------------------------------------------------------------------------------------------------------------------------------------------------------------------------------------------------------------------------------------------------------------------------------------------------------------------------------------------------------------------------------------------------------------------------------------------------------------------------------------------------------------------------------------------------------------------------|---------------------------------------------------------------------------------------------------------------------------------------------------------------------------------------------------------------------------------------------------------------------------------------------------------------------------------------------------------------------------------------------------------------------------------------------------------------------------------------------------------------------------------------------------------------------------------------------------------------------------------------------------------------------------------------------------------------------------------------------------------------------------------------------------------------------------------------------------------------------------------------------------------------------------------------|
| <b>The senior cat wellness visit</b>                                                                                                                                                                                                                                                                                                                                                                                                                                                                                                                                                                                                                                                                                                                                                                          | <b>La visita de bienestar para gatos mayores</b>                                                                                                                                                                                                                                                                                                                                                                                                                                                                                                                                                                                                                                                                                                                                                                                                                                                                                      |
| <b>Information gathering: understanding owner and cat concerns</b><br><p>Many domestic cats have seen an increase in life expectancy due to improved veterinary care, better nutrition and more informed, engaged owners. This gives veterinarians the opportunity to take a comprehensive approach to the assessment and management of senior feline patients. Educating clients to appreciate subtle changes that may point to an underlying disorder can help them partner with the veterinarian to observe their feline companions more closely. Routine assessment facilitates health maintenance and early detection of disease, often resulting in easier disease management and prevention, and may lead to better quality of life; it is less costly and more successful than crisis management.</p> | <b>Recopilación de información: comprensión de las preocupaciones del dueño y del gato</b><br><p>Muchos gatos domésticos han visto un aumento en la expectativa de vida debido a una mejor atención veterinaria, una mejor nutrición y propietarios más informados y comprometidos. Esto brinda la oportunidad a los veterinarios de adoptar un enfoque integral para la evaluación y el manejo de los pacientes felinos mayores. Educar a los clientes para que aprecien los cambios sutiles puede indicar un trastorno subyacente puede ayudarlos a colaborar con el veterinario para observar más de cerca a sus compañeros felinos. La evaluación de rutina facilita el mantenimiento de la salud y la detección temprana de enfermedades, lo que a menudo resulta en un manejo y prevención de enfermedades más fáciles y puede conducir a una mejor calidad de vida; es menos costoso y más exitoso en el manejo de crisis.</p> |

|                                                                                                                                                                                                                                                                                                                                                                                                                                                                                                                                                                                                                                                                                                                                                                                                                                                                                                                                                                                                                                                                                                                                                                   |                                                                                                                                                                                                                                                                                                                                                                                                                                                                                                                                                                                                                                                                                                                                                                                                                                                                                                                                                                                                                                                                                                                                                  |
|-------------------------------------------------------------------------------------------------------------------------------------------------------------------------------------------------------------------------------------------------------------------------------------------------------------------------------------------------------------------------------------------------------------------------------------------------------------------------------------------------------------------------------------------------------------------------------------------------------------------------------------------------------------------------------------------------------------------------------------------------------------------------------------------------------------------------------------------------------------------------------------------------------------------------------------------------------------------------------------------------------------------------------------------------------------------------------------------------------------------------------------------------------------------|--------------------------------------------------------------------------------------------------------------------------------------------------------------------------------------------------------------------------------------------------------------------------------------------------------------------------------------------------------------------------------------------------------------------------------------------------------------------------------------------------------------------------------------------------------------------------------------------------------------------------------------------------------------------------------------------------------------------------------------------------------------------------------------------------------------------------------------------------------------------------------------------------------------------------------------------------------------------------------------------------------------------------------------------------------------------------------------------------------------------------------------------------|
| <p>Ideally, schedule longer appointments for senior cat visits. While we often come from the perspective of advocating for the cat, an understanding of client resources, abilities, behaviors and beliefs ensures we address client concerns. Sending a questionnaire to be completed ahead of time and checking on client goals early during the visit facilitate this understanding. Asking open-ended questions pertaining to all body systems yields more meaningful data. Client observations can help the veterinarian detect subtle changes; however, many clients may be unaware of gradual changes until we ask provocative questions. Client-recorded videos of patient activities at home may provide additional insights into the health status of the cat. Obtaining a systematic and thorough history may take a little longer initially, yet often results in more accurate diagnosis and effective care of the senior cat.</p>                                                                                                                                                                                                                   | <p>Idealmente, programe citas más largas para las visitas de gatos mayores. Mientras que a menudo venimos de la perspectiva de abogar por el gato, la comprensión de los recursos, habilidades, comportamientos y creencias del cliente asegura que abordemos las preocupaciones del cliente. Enviar un cuestionario para que se complete con anticipación y verificar los objetivos del cliente al principio de la visita facilitar esta comprensión. Hacer preguntas abiertas relacionadas con todos los sistemas corporales produce datos más significativos. Las observaciones del cliente pueden ayudar al veterinario a detectar cambios sutiles; sin embargo, es posible que muchos clientes no se den cuenta de los cambios graduales hasta que les hacemos preguntas provocativas. Los videos grabados por el cliente de las actividades del paciente en el hogar pueden proporcionar información adicional sobre el estado de salud del gato. Obtener un historial sistemático y completo puede llevar un poco más de tiempo al principio, pero a menudo resulta en un diagnóstico más preciso y un cuidado eficaz del gato mayor.</p> |
| <p>Task Force members consider the following key items when developing a plan to ascertain the status of the cat:</p> <ul style="list-style-type: none"><li>* Environment: How the cat’s home is structured; what other people/pets share the space; time the cat spends outside (free roaming, on leash, in outdoor enclosure); whether the cat must traverse stairs; feeding routine and location(s) of feeding stations; sleeping posture, patterns and locations; number of litter boxes, type and location.</li><li>* Intake: Specific products fed, amount consumed (caloric intake); supplements and/or medications given; intake from prey or other food sources; preventives used; observations of chewing behavior; estimated water intake.</li><li>* Eliminations: Urination and defecation sites, frequency and quantity (litter ball size, amount of stool passed, fecal score); any sudden onset of unusual behavior (eg, house-soiling) in either the current patient or another cat (may reflect occult disease); a cat may also detect illness in a housemate if the disease changes the smell of a companion cat or its eliminations.</li></ul> | <p>Los miembros del grupo de trabajo consideran los siguientes elementos clave al desarrollar un plan para determinar el estado del gato:</p> <ul style="list-style-type: none"><li>* Entorno: Cómo está estructurada la casa del gato; que otras personas / mascotas comparten el espacio; el tiempo que el gato pasa afuera (deambulando libremente, con correa, en un cercado al aire libre); si el gato debe atravesar escaleras; rutina de alimentación y ubicación (es) de las estaciones de alimentación; postura, patrones y ubicaciones para dormir; número de cajas de arena, tipo y ubicación.</li><li>* Ingesta: Productos específicos alimentados, cantidad consumida (aporte calórico); suplementos y / o medicamentos administrados; ingesta de presas u otras fuentes de alimentos; preventivos utilizados; observaciones del comportamiento de masticación; ingesta estimada de agua.</li></ul>                                                                                                                                                                                                                                 |

\* Patterns of activities: Grooming habits (Figure 1), vocalizations, and interactions with other animals/people; sleeping behavior and locations; response to visual cues and sounds; jumping and playing behavior (inviting clients to keep video records from an early age will allow comparisons with current levels of activity).

\* Eliminaciones: lugares para orinar y defecar, frecuencia y cantidad (tamaño de la bola de arena, cantidad de heces evacuadas, puntaje fecal); cualquier aparición repentina de un comportamiento inusual (por ejemplo, ensuciar la casa) en el paciente actual o en otro gato (puede reflejar una enfermedad oculta); un gato también puede detectar una enfermedad en un compañero de casa si la enfermedad cambia el olor de un gato de compañía o sus eliminaciones.

\* Patrones de actividades: hábitos de aseo (Figura 1), vocalizaciones e interacciones con otros animales / personas; comportamiento y lugares para dormir; respuesta a señales visuales y sonidos; Comportamiento de saltar y jugar (invitar a los clientes a mantener registros de video desde una edad temprana permitirá realizar comparaciones con los niveles actuales de actividad).

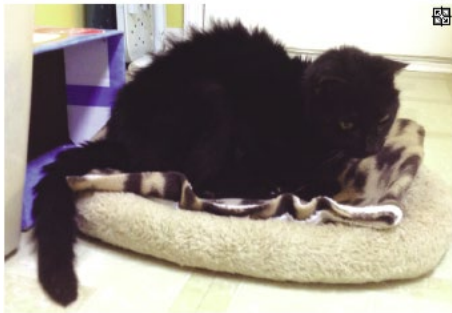

Figure 1. This 15-year-old cat shows a decreased pattern of grooming. *Courtesy of Sheilah Robertson*

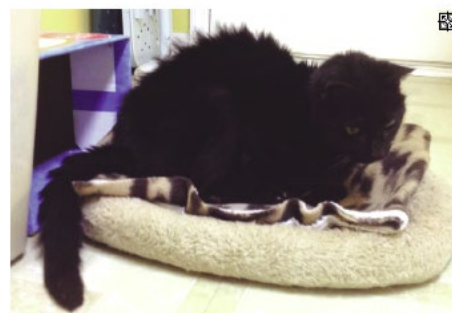

Figura 1. Este gato de 15 años muestra un patrón de acicalamiento disminuido. *Cortesía de Sheilah Robertson*

Veterinarians often quote the adage, 'Old age is not a disease', but it is a process. As with all species, changes are seen in the aging cat (Figure 2).

Los veterinarios suelen citar el refrán "La vejez no es una enfermedad", pero es un proceso. Como ocurre con todas las especies, se observan cambios en el gato envejecido (Figura 2).



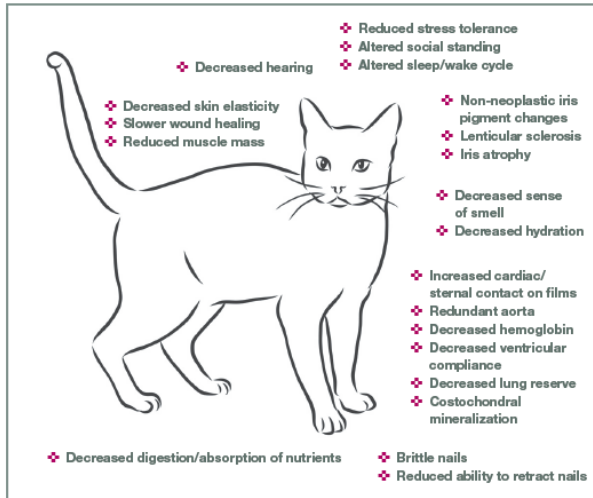

Figure 2. Changes associated with aging (and often seen in apparently healthy senior cats)

- \* Reduced stress tolerance
- \* Altered social standing
- \* Altered sleep/wake cycle
- \* Non-neoplastic iris pigment changes
- \* Lenticular sclerosis
- \* Iris atrophy
- \* Decreased sense of smell
- \* Decreased hydration
- \* Increased cardiac/sternal contact on films
- \* Redundant aorta
- \* Decreased hemoglobin
- \* Decreased ventricular compliance
- \* Decreased lung reserve
- \* Costochondral mineralization
- \* Brittle nails
- \* Reduced ability to retract nails
- \* Decreased digestion/absorption of nutrients
- \* Decreased skin elasticity
- \* Slower wound healing
- \* Reduced muscle mass
- \* Decreased hearing

Figura 2. Cambios asociados con el envejecimiento (y a menudo observados en gatos mayores aparentemente sanos)

- \* Reducción de la tolerancia al estrés
- \* Situación social alterada
- \* Ciclo de sueño / vigilia alterado
- \* Cambios de pigmento del iris no neoplásicos
- \* Esclerosis lenticular
- \* Atrofia del iris
- \* Disminución del sentido del olfato
- \* Disminución de la hidratación
- \* Mayor contacto esternal/ cardíaco en filmes radiográficos
- \* Aorta redundante
- \* Disminución de la hemoglobina
- \* Disminución de la distensibilidad ventricular
- \* Disminución de la reserva pulmonar.
- \* Mineralización costochondral
- \* Uñas quebradizas
- \* Capacidad reducida para retraer las uñas.
- \* Disminución de la digestión / absorción de nutrientes.
- \* Disminución de la elasticidad de la piel.
- \* Cicatrización de heridas más lenta
- \* Masa muscular reducida
- \* Disminución de la audición

Muscle wasting in seniors carries important implications for health status. Cachexia refers to weight loss in the face of underlying disease.<sup>5</sup> Sarcopenia refers to loss of muscle mass as a syndrome associated with aging, independent of illness.<sup>5</sup> Sarcopenia includes a loss of both muscle mass and strength (Figure 3). This may manifest itself as decreased jumping and physical strength, as well as reduced activity and interactions. The physical manifestations of sarcopenia intersect with the physiologic manifestations of frailty. Given the association of sarcopenia with poorer outcomes, recognition of signs of feline frailty is especially important.<sup>6</sup> Explore potential pathologic causes when signs of frailty are detected. Even if no diseases are found, early therapeutic interventions may help to restore some function.

La pérdida muscular en gatos mayores tiene importantes implicaciones para el estado de salud. La caquexia se refiere a la pérdida de peso ante una enfermedad subyacente.<sup>5</sup> La sarcopenia se refiere a la pérdida de masa muscular como un síndrome asociado con el envejecimiento, independientemente de la enfermedad.<sup>5</sup> La sarcopenia incluye una pérdida tanto de masa muscular como de fuerza (Figura 3). Esto puede manifestarse como una disminución de la fuerza física y en los saltos, así como una reducción de la actividad y las interacciones. Las manifestaciones físicas de la sarcopenia se cruzan con las manifestaciones fisiológicas de la fragilidad. Dada la asociación de la sarcopenia con peores resultados, el reconocimiento de los signos de fragilidad felina es especialmente importante.<sup>6</sup> Explorar las posibles causas patológicas cuando se detecten signos de fragilidad. Incluso si no se encuentran enfermedades, las intervenciones terapéuticas tempranas pueden ayudar a restaurar alguna función.

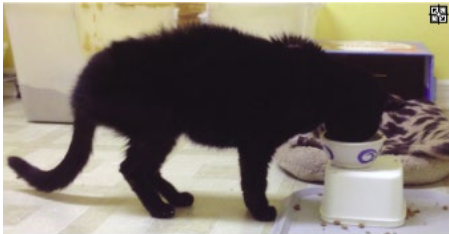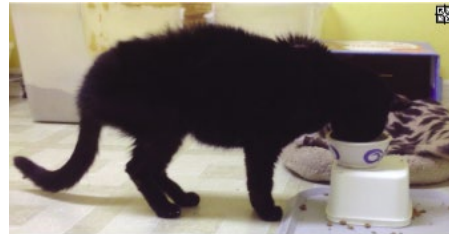

Figure 3. Same cat as in Figure 1, showing signs of frailty, including loss of muscle mass and strength. This senior was diagnosed with sarcopenia, osteoarthritis and hyperthyroidism. *Courtesy of Sheilah Robertson*

Figura 3. El mismo gato que en la Figura 1, que muestra signos de fragilidad, incluida la pérdida de masa muscular y fuerza. Este gato mayor fue diagnosticado con sarcopenia, osteoartritis e hipertiroidismo. *Cortesía de Sheilah Robertson*

Nutritional manipulation may be beneficial. Highly digestible diets rich in antioxidants and omega-3 fatty acids,<sup>7</sup> as well as interactive toys and puzzles and environmental enrichment,<sup>8,9</sup> may all help to slow the development of sarcopenia.

La manipulación nutricional puede resultar beneficiosa. Las dietas digestibles altamente ricas en antioxidantes y ácidos grasos omega-3,<sup>7</sup> así como los juguetes y rompecabezas interactivos y el enriquecimiento ambiental,<sup>8,9</sup> pueden ayudar a retrasar el desarrollo de la sarcopenia.

|                                                                                                                                                                                                                                                                                                                                                                                                                                                                                                                                                                                                                                                                                                                                 |                                                                                                                                                                                                                                                                                                                                                                                                                                                                                                                                                                                                                                                                                                                                                                                                                                                                            |
|---------------------------------------------------------------------------------------------------------------------------------------------------------------------------------------------------------------------------------------------------------------------------------------------------------------------------------------------------------------------------------------------------------------------------------------------------------------------------------------------------------------------------------------------------------------------------------------------------------------------------------------------------------------------------------------------------------------------------------|----------------------------------------------------------------------------------------------------------------------------------------------------------------------------------------------------------------------------------------------------------------------------------------------------------------------------------------------------------------------------------------------------------------------------------------------------------------------------------------------------------------------------------------------------------------------------------------------------------------------------------------------------------------------------------------------------------------------------------------------------------------------------------------------------------------------------------------------------------------------------|
| <p>Unexplained trends in body weight, body condition score (BCS) and/or muscle condition score (MCS) are problems that must be investigated and managed as diseases. Consider weight changes in the context of the cat’s size. Petite cats may not change much in absolute terms, but a proportional change could be significant. Body composition alters even within a constant weight, so concurrent assessment of MCS and BCS is critical. More information on body condition and muscle condition scoring is provided by the International Society of Feline Medicine (ISFM; <a href="http://www.bit.ly/ISFMMCS">www.bit.ly/ISFMMCS</a>). Over-weight and underweight cats have associated health risks.<sup>9,10</sup></p> | <p>Las tendencias inexplicables en el peso corporal, el puntaje de condición corporal (BCS) y / o el puntaje de condición muscular (MCS) son problemas que deben investigarse y manejarse como enfermedades. Considere los cambios de peso en el contexto del tamaño del gato. Es posible que los gatos pequeños no cambien mucho en términos absolutos, pero un cambio proporcional podría ser significativo. La composición corporal se altera incluso dentro de un peso constante, por lo que la evaluación simultánea de MCS y BCS son fundamental. La Sociedad Internacional de Medicina Felina (ISFM; <a href="http://www.bit.ly/ISFMMCS">www.bit.ly/ISFMMCS</a>) proporciona más información sobre la calificación de la condición corporal y la condición muscular. Los gatos con sobrepeso y bajo peso están asociados con riesgos a la salud.<sup>9,10</sup></p> |
| <p><b>The senior cat physical examination</b></p> <p>Healthy people are encouraged to have wellness examinations yearly. The life span of a cat is five times shorter than the life span of a human, so an equivalent frequency in a healthy adult cat would be every 10–11 weeks! While this may not be practical, it does emphasize the need for more than one annual examination (see box). The cat’s innate ability to hide ailments makes regular physical examination that much more critical in the elderly cat.</p>                                                                                                                                                                                                     | <p><b>El examen físico del gato mayor</b></p> <p>A las personas sanas se les anima a realizarse exámenes de bienestar anualmente. La duración de vida de un gato es cinco veces más corta que la de un humano, por lo que una frecuencia equivalente en un gato adulto sano sería cada 10 a 11 semanas. Si bien esto puede no ser práctico, enfatiza la necesidad de más de un examen anual (ver recuadro debajo). La capacidad innata del gato para ocultar las dolencias hace que el examen físico regular sea mucho más crítico en el gato anciano.</p>                                                                                                                                                                                                                                                                                                                 |
| <p>The Task Force recommends examinations twice yearly for cats 10–15 years old, with examinations every 4 months for healthy seniors over the age of 15. Those with chronic health issues may need to be seen more frequently, depending on the severity and stability of their ailments.</p>                                                                                                                                                                                                                                                                                                                                                                                                                                  | <p>El grupo de trabajo recomienda exámenes dos veces al año para gatos de 10 a 15 años, con exámenes cada 4 meses para los gatos mayores sanos de 15 años. Aquellos con problemas de salud crónicos pueden necesitar ser vistos con más frecuencia, dependiendo de la gravedad y estabilidad de sus dolencias.</p>                                                                                                                                                                                                                                                                                                                                                                                                                                                                                                                                                         |

Cats, particularly senior cats, must be handled gently. If it is known beforehand that the cat may be painful or that examination will be particularly painful, analgesia is appropriate and recommended, as described in the ‘2015 AAHA/AAFP Pain Management Guidelines’.<sup>12</sup> Provide patients that object to handling due to stress or pain with analgesics and/or anxiolytics. If stress or pain cannot be adequately and safely controlled, it may be necessary to abandon and reschedule the examination.

Los gatos, especialmente los gatos mayores, deben manejarse con cuidado. Si se sabe de antemano que puede ser doloroso para el gato o que un examen será particularmente doloroso, la analgesia es apropiada y recomendada, como se describe en la “Guía del manejo del dolor de la AAHA / AAFP de 2015”.<sup>12</sup> Proporcione a los pacientes que se oponen al manejo debido al estrés o dolor con analgésicos y / o ansiolíticos. Si el estrés o el dolor no se pueden controlar de manera adecuada y segura, puede ser necesario abandonar y reprogramar el examen.

**Box 1**

**Examination begins at home**

Teaching clients that the start of an examination appointment begins at home is important. Cats forced into carriers or swung by the carrier handle may display motion sickness, hypertension or other signs of stress that adversely affect physical examination findings and blood test results. Using techniques described in the ‘AAFP and ISFM Feline-Friendly Handling Guidelines’<sup>11</sup> will help reduce stress. When patients’ visits are a positive experience, clients are calmer and more likely to schedule an appointment to further evaluate medical concerns.

**Box 1**

**Examination begins at home**

Teaching clients that the start of an examination appointment begins at home is important. Cats forced into carriers or swung by the carrier handle may display motion sickness, hypertension or other signs of stress that adversely affect physical examination findings and blood test results. Using techniques described in the ‘AAFP and ISFM Feline-Friendly Handling Guidelines’<sup>11</sup> will help reduce stress. When patients’ visits are a positive experience, clients are calmer and more likely to schedule an appointment to further evaluate medical concerns.

**Recuadro 1**

**El examen comienza en casa**

Es importante enseñar a los clientes que el inicio de una cita de examen comienza en casa. Los gatos forzados a subir a los transportadores para gatos son colgados del asa del transportador pueden mostrar mareos, hipertensión u otros signos de estrés que afectan negativamente los resultados del examen físico y los resultados de los análisis de sangre. El uso de las técnicas descritas en la “Guía de manejo amigable con los felinos de la AAFP e ISFM”<sup>11</sup> ayudará a reducir el estrés. Cuando las visitas de los pacientes son una experiencia positiva, los clientes están más tranquilos y es más probable que programen una cita para evaluar más a fondo las preocupaciones médicas.

|                                                                                                                                                                                                                                                                                                                                                                                                                                                                                                                                                                                                                                                                                                                                                                                                                                                                                                                                                                                                                                                                                                 |                                                                                                                                                                                                                                                                                                                                                                                                                                                                                                                                                                                                                                                                                                                                                                                                                                                                                                                                                                                                                                                                                                                                                          |
|-------------------------------------------------------------------------------------------------------------------------------------------------------------------------------------------------------------------------------------------------------------------------------------------------------------------------------------------------------------------------------------------------------------------------------------------------------------------------------------------------------------------------------------------------------------------------------------------------------------------------------------------------------------------------------------------------------------------------------------------------------------------------------------------------------------------------------------------------------------------------------------------------------------------------------------------------------------------------------------------------------------------------------------------------------------------------------------------------|----------------------------------------------------------------------------------------------------------------------------------------------------------------------------------------------------------------------------------------------------------------------------------------------------------------------------------------------------------------------------------------------------------------------------------------------------------------------------------------------------------------------------------------------------------------------------------------------------------------------------------------------------------------------------------------------------------------------------------------------------------------------------------------------------------------------------------------------------------------------------------------------------------------------------------------------------------------------------------------------------------------------------------------------------------------------------------------------------------------------------------------------------------|
| <p>A thorough examination begins by observing from a distance. Simple observation can help detect changes in breathing patterns, gait, stance, strength, coordination and vision. The hands-on physical examination may be conducted in any order, provided it is thorough and painful areas are examined last. To reduce stress, save the most invasive parts of the examination until the end, such as the dental examination, temperature or nail trim, sample collection, and imaging studies.<sup>2</sup></p> <p>Especialmente para los gatos mayores de 10 años de edad, la determinación de la presión arterial (PA) en cada examen proporciona información esencial. El riesgo de hipertensión aumenta con la edad<sup>13,14</sup> y se reconoce con mayor frecuencia en gatos de 10 años y más mayores.<sup>15</sup> Si no se trata, la hipertensión puede causar daños severos de los órganos a los ojos, corazón, cerebro y riñones,<sup>16,17</sup> que pueden no ser reversibles. Las mediciones de rutina en cada examen pueden ayudar a reducir la hipertensión situacional.</p> | <p>Un examen completo comienza observando desde la distancia. La simple observación puede ayudar a detectar cambios en los patrones de respiración, la marcha, la postura, la fuerza, la coordinación y la visión. El examen físico práctico se puede realizar en cualquier orden, siempre que sea minucioso y las áreas dolorosas se examinen en último lugar. Para reducir el estrés, guarde las partes más invasivas del examen hasta el final, como el examen dental, la temperatura o el corte de uñas, la recolección de muestras y los estudios de imágenes.<sup>2</sup></p> <p>Especialmente para los gatos mayores de 10 años, la determinación de la presión arterial (PA) en cada examen proporciona información esencial. El riesgo de hipertensión aumenta con la edad<sup>13,14</sup> y se reconoce con mayor frecuencia en gatos de 10 años y más mayores.<sup>15</sup> Si no se trata, la hipertensión puede causar daños severos de los órganos a los ojos, corazón, cerebro y riñones,<sup>16,17</sup> que pueden no ser reversibles. Las mediciones de rutina en cada examen pueden ayudar a reducir la hipertensión situacional.</p> |
| <p>Detailed information on the standard protocol for systemic BP measurement in cats can be found in the AAFP Hypertension Educational Toolkit<sup>18</sup> and 'ISFM Consensus Guidelines on the Diagnosis and Management of Hypertension in Cats'.<sup>17</sup> Blood pressure measurement videos produced by ISFM are available at <a href="http://www.youtube.com/user/iCatCare">www.youtube.com/user/iCatCare</a>.</p> <p>Optimal care can only be planned if a cat's body weight is measured, and BCS and MCS are determined, at each visit.</p>                                                                                                                                                                                                                                                                                                                                                                                                                                                                                                                                          | <p>Se puede encontrar información detallada sobre el protocolo estándar para la medición sistémica de la PA en gatos en el "Kit de herramientas educativas sobre hipertensión de la AAFP"<sup>18</sup> y la "Guía de consenso del ISFM sobre el diagnóstico y manejo de la hipertensión en gatos".<sup>17</sup> Videos de la medición de la presión sanguínea producidos por ISFM están disponibles en <a href="http://www.youtube.com/user/iCatCare">www.youtube.com/user/iCatCare</a>.</p> <p>El cuidado óptimo solo se puede planificar si se mide el peso corporal de un gato y se determinan la BCS y la MCS en cada visita.</p>                                                                                                                                                                                                                                                                                                                                                                                                                                                                                                                    |

|                                                                                                                                                                                                                                                                                                                                                                                                                                                                                                                                                                                                                                                                                                                                                                                                                   |                                                                                                                                                                                                                                                                                                                                                                                                                                                                                                                                                                                                                                                                                                                                                                                                                                                                                                                                                        |
|-------------------------------------------------------------------------------------------------------------------------------------------------------------------------------------------------------------------------------------------------------------------------------------------------------------------------------------------------------------------------------------------------------------------------------------------------------------------------------------------------------------------------------------------------------------------------------------------------------------------------------------------------------------------------------------------------------------------------------------------------------------------------------------------------------------------|--------------------------------------------------------------------------------------------------------------------------------------------------------------------------------------------------------------------------------------------------------------------------------------------------------------------------------------------------------------------------------------------------------------------------------------------------------------------------------------------------------------------------------------------------------------------------------------------------------------------------------------------------------------------------------------------------------------------------------------------------------------------------------------------------------------------------------------------------------------------------------------------------------------------------------------------------------|
| <p>For the senior cat, hydration status is extremely important because some of the more common comorbidities, such as chronic kidney disease (CKD) and diabetes mellitus (DM), produce a gradual loss of body fluid. Loss of subcutaneous fat and/or tissue elasticity may influence interpretation of skin tenting results and mucous membrane moisture could be more indicative of hydration status.</p>                                                                                                                                                                                                                                                                                                                                                                                                        | <p>Para el gato mayor, el estado de hidratación es extremadamente importante porque algunas de las comorbilidades más comunes, como la enfermedad renal crónica (ERC) y la diabetes mellitus (DM), producen una pérdida gradual de fluidos corporales. La pérdida de la grasa subcutánea y / o de la elasticidad del tejido puede influir en la interpretación de los resultados de la reacción de la piel (al pellizcarla) y la humedad de las membranas mucosas podría ser más indicativa del estado de hidratación.</p>                                                                                                                                                                                                                                                                                                                                                                                                                             |
| <p>Assessment of skin, nails and haircoat includes paying particular attention to the quality of the nails, as they tend to thicken and become ingrown. Offering nurse or technician nail trim appointments provides a resource to owners who are unable to trim nails routinely. Nail quality changes can be particularly problematic for arthritic cats too painful to use a scratching post.</p> <p>A thorough examination of the nose and mouth includes palpation of the nasal contours, and visualization of the gingiva, pharynx, palate, sublingual area and teeth, carefully noting unusual tooth loss. Additionally, palpation of the area between and under the mandibles may identify tumors or lymphadenopathy. Any asymmetry noted during evaluation of the head warrants closer investigation.</p> | <p>La evaluación de la piel, las uñas y el pelaje incluye prestar especial atención a la calidad de las uñas, ya que tienden a engrosarse y encarnarse. Ofrecer citas con enfermeras o técnicos para cortar las uñas provee un recurso para los propietarios que no pueden cortarse las uñas de forma rutinaria. Los cambios en la calidad de las uñas pueden ser particularmente problemáticos para los gatos artríticos, causando demasiado dolor al usar un rascador.</p> <p>Un examen completo de la nariz y la boca incluye la palpación de los contornos nasales y la visualización de la encía, la faringe, el paladar, el área sublingual y los dientes, observando cuidadosamente la pérdida inusual de los dientes. Además, la palpación del área entre y debajo de las mandíbulas puede identificar tumores o linfadenopatías. Cualquier asimetría observada durante la evaluación de la cabeza merece una investigación más detallada.</p> |

|                                                                                                                                                                                                                                                                                                                                                                                                                                                                                                                                                                                                                                                                                                                                                                                                                                                                                                                                                                                                                                                                                                                                |                                                                                                                                                                                                                                                                                                                                                                                                                                                                                                                                                                                                                                                                                                                                                                                                                                                                                                                                                                                                                                                                                                                                                                                                                                                                                 |
|--------------------------------------------------------------------------------------------------------------------------------------------------------------------------------------------------------------------------------------------------------------------------------------------------------------------------------------------------------------------------------------------------------------------------------------------------------------------------------------------------------------------------------------------------------------------------------------------------------------------------------------------------------------------------------------------------------------------------------------------------------------------------------------------------------------------------------------------------------------------------------------------------------------------------------------------------------------------------------------------------------------------------------------------------------------------------------------------------------------------------------|---------------------------------------------------------------------------------------------------------------------------------------------------------------------------------------------------------------------------------------------------------------------------------------------------------------------------------------------------------------------------------------------------------------------------------------------------------------------------------------------------------------------------------------------------------------------------------------------------------------------------------------------------------------------------------------------------------------------------------------------------------------------------------------------------------------------------------------------------------------------------------------------------------------------------------------------------------------------------------------------------------------------------------------------------------------------------------------------------------------------------------------------------------------------------------------------------------------------------------------------------------------------------------|
| <p>Ophthalmic evaluation includes careful examination of both the anterior and posterior chambers, iris color and shape, as well as the retinal area. Common lesions that progress with aging are lenticular sclerosis, iris atrophy, iris melanosis, focal or linear cataracts<sup>19,20</sup> and variable tear production.<sup>21,22</sup> Visualization of the retina is especially important for early detection of vascular changes or edema, which are warning signs of hypertension and subsequent retinal detachment.<sup>22–24</sup> Sequential evaluations of the eye and concomitant images of lesions, or color and structural changes, will alert a practitioner early on to the possibility of developing neoplasia, and potentially allow lifesaving treatment.</p> <p>Palpation of the cat's neck when the cat is sitting with its neck extended or standing with its head elevated and turned to each side will reveal a palpable thyroid gland in 80% or more cases of feline hyperthyroidism (FHT); however, a palpable nodule may also be present in cats with non-thyroidal disease.<sup>25–27</sup></p> | <p>La evaluación oftálmica incluye un examen cuidadoso de las cámaras anterior y posterior, el color y la forma del iris, así como el área de la retina. Las lesiones habituales que progresan con el envejecimiento son la esclerosis lenticular, la atrofia del iris, la melanosis del iris, las cataratas focales o lineales<sup>19,20</sup> y la producción variable de lágrimas.<sup>21,22</sup> La visualización de la retina es especialmente importante para la detección precoz de cambios vasculares o edema, que son signos de alerta de la hipertensión y posterior desprendimiento de retina.<sup>22–24</sup> Las evaluaciones secuenciales del ojo y las imágenes concomitantes de las lesiones, o cambios de color y estructurales, alertarán al médico desde el principio sobre la posibilidad de desarrollar una neoplasia y potencialmente permitirán un tratamiento que salve la vida.</p> <p>La palpación del cuello del gato cuando el gato está sentado con el cuello extendido o de pie con la cabeza elevada y girada hacia cada lado revelará una glándula tiroides palpable en el 80% o más de los casos de hipertiroidismo felino (HT); sin embargo, también puede haber un nódulo palpable en gatos con enfermedad no tiroidea.<sup>25–27</sup></p> |
| <p>Listen to all four quadrants of the thorax during thoracic auscultation to determine heart and respiratory rate, identify heart murmurs or arrhythmias and assess lung sounds. The cranial thorax should be compressible; cranial mediastinal masses can reduce compressibility (ie, absence of cranial rib spring).</p> <p>Using a gentle technique, attempt to palpate each organ during abdominal palpation, noting evidence of pain or masses, areas of thickened bowel, the amount and consistency of stool, kidney and bladder texture, shape and size, as well as the size and location of identifiable lymph nodes. Palpation of the mammary chain can be incorporated into abdominal examination.</p>                                                                                                                                                                                                                                                                                                                                                                                                              | <p>Escuchar los cuatro cuadrantes del tórax durante la auscultación torácica para determinar la frecuencia cardíaca y respiratoria, identificar soplos o arritmias cardíacas y evaluar los sonidos pulmonares. El tórax craneal debe ser comprensible; Las masas mediastínicas craneales pueden reducir la compresibilidad (p. ej., ausencia de resorte de la costilla craneal).</p> <p>Usando una técnica suave, intente palpar cada órgano durante la palpación abdominal, notando evidencia de dolor o masas, áreas de intestino engrosado, la cantidad y consistencia de las heces, la textura, forma y tamaño de los riñones y la vejiga, así como el tamaño y ubicación de ganglios linfáticos identificables. La palpación de la cadena mamaria se puede incorporar al examen abdominal.</p>                                                                                                                                                                                                                                                                                                                                                                                                                                                                             |

|                                                                                                                                                                                                                                                                                                                                                                                                                                                                                                                                                                                                                                                                                                                                                                                                                                                                                                                                                                                                        |                                                                                                                                                                                                                                                                                                                                                                                                                                                                                                                                                                                                                                                                                                                                                                                                                                                                                                                                                                                                                                                                                                                                        |
|--------------------------------------------------------------------------------------------------------------------------------------------------------------------------------------------------------------------------------------------------------------------------------------------------------------------------------------------------------------------------------------------------------------------------------------------------------------------------------------------------------------------------------------------------------------------------------------------------------------------------------------------------------------------------------------------------------------------------------------------------------------------------------------------------------------------------------------------------------------------------------------------------------------------------------------------------------------------------------------------------------|----------------------------------------------------------------------------------------------------------------------------------------------------------------------------------------------------------------------------------------------------------------------------------------------------------------------------------------------------------------------------------------------------------------------------------------------------------------------------------------------------------------------------------------------------------------------------------------------------------------------------------------------------------------------------------------------------------------------------------------------------------------------------------------------------------------------------------------------------------------------------------------------------------------------------------------------------------------------------------------------------------------------------------------------------------------------------------------------------------------------------------------|
| <p>An orthopedic examination can help identify changes in joints, including thickening, fluid, crepitus, pain and range of motion. Gently palpate limbs and joints individually for thickness or tenderness. Some cats may not demonstrate pain nor have crepitus upon palpation. Assess muscle mass and assign an MCS. Pay special attention to areas of muscle atrophy as these can indicate localized painful conditions. Areas of barbering or overgrooming may indicate underlying pain. Overall muscle mass loss seems more indicative of systemic disease.</p>                                                                                                                                                                                                                                                                                                                                                                                                                                  | <p>Un examen ortopédico puede ayudar a identificar cambios en las articulaciones, que incluyen engrosamiento, líquido, crepitación, dolor y rango de movimiento. Palpar suavemente las extremidades y las articulaciones individualmente para comprobar su grosor o sensibilidad. Algunos gatos pueden no mostrar dolor ni tener crepitaciones a la palpación. Evalúe la masa muscular y asigne un MCS. Preste especial atención a las áreas de atrofia muscular, ya que pueden indicar condiciones dolorosas localizadas. Las áreas recortadas por el aseo o de aseo excesivo pueden indicar un dolor subyacente. La pérdida de masa muscular general parece más indicativa de enfermedad sistémica.</p>                                                                                                                                                                                                                                                                                                                                                                                                                              |
| <p>A myofascial examination is helpful to assess the viscosity, mobility, temperature and comfort of soft tissue structures. If performed correctly, the examination is a soothing, gentle and inquisitive approach to assess pain of multiple origins, including osteoarthritic, spinal, soft tissue and visceral origin. Myofascial examination relies on soft tissue palpation while being attuned to subtle indicators of pain such as changes in body posture, facial expression, strain patterns in muscles or fascia, skin adherence, and heat. Pain detected during a myofascial examination may originate from the surface being palpated or be reflective of pain from internal viscera deeper below the surface.</p> <p>A video demonstrating myofascial examination is included in the supplementary material (see page 631).</p> <p>Finally, compare all parameters with those from the last examination to identify trends as early indicators of disease or a degenerative process.</p> | <p>Un examen miofascial es útil para evaluar la viscosidad, movilidad, temperatura y comodidad de las estructuras de tejidos blandos. Si se realiza correctamente, el examen es un enfoque relajante, suave e inquisitivo para evaluar el dolor de múltiples orígenes, incluido el origen osteoartrotico, espinal, de tejidos blandos y visceral. El examen miofascial se basa en la palpación de los tejidos blandos mientras se sintoniza con los indicadores sutiles del dolor, como los cambios en la postura corporal, expresión facial, patrones de tensión en músculos o fascia, adherencia de la piel y calor. El dolor detectado durante un examen miofascial puede originarse en la superficie que se palpa o ser un reflejo del dolor de las vísceras internas más profundas debajo de la superficie.</p> <p>En el material complementario se incluye un video que demuestra el examen miofascial (Consulte la página 57 de este documento.).</p> <p>Finalmente, compare todos los parámetros con los del último examen para identificar tendencias como indicadores tempranos de enfermedad o un proceso degenerativo.</p> |



| Recommended diagnostics                                                                                                                                                                                                                                                                                                                                                                                                                                                                                                                                                                                                                                                                                                                                                                                                                                                                                                                                                                                                                                                                                                                                                                                                                                                                                                                                                                                                                                                                                                                                                                                                                                                                                                                                                                                                        | Diagnósticos recomendados                                                                                                                                                                                                                                                                                                                                                                                                             |                  |                                                                                                     |                                                                                                                                                            |                                                                                                                                                                                                                       |                                                                                                                                                                                                     |                                                                                                                                                                                                                                  |  |                                                                                        |                                                             |                       |                                     |                             |  |  |                                 |  |                                                                  |                                                                 |
|--------------------------------------------------------------------------------------------------------------------------------------------------------------------------------------------------------------------------------------------------------------------------------------------------------------------------------------------------------------------------------------------------------------------------------------------------------------------------------------------------------------------------------------------------------------------------------------------------------------------------------------------------------------------------------------------------------------------------------------------------------------------------------------------------------------------------------------------------------------------------------------------------------------------------------------------------------------------------------------------------------------------------------------------------------------------------------------------------------------------------------------------------------------------------------------------------------------------------------------------------------------------------------------------------------------------------------------------------------------------------------------------------------------------------------------------------------------------------------------------------------------------------------------------------------------------------------------------------------------------------------------------------------------------------------------------------------------------------------------------------------------------------------------------------------------------------------|---------------------------------------------------------------------------------------------------------------------------------------------------------------------------------------------------------------------------------------------------------------------------------------------------------------------------------------------------------------------------------------------------------------------------------------|------------------|-----------------------------------------------------------------------------------------------------|------------------------------------------------------------------------------------------------------------------------------------------------------------|-----------------------------------------------------------------------------------------------------------------------------------------------------------------------------------------------------------------------|-----------------------------------------------------------------------------------------------------------------------------------------------------------------------------------------------------|----------------------------------------------------------------------------------------------------------------------------------------------------------------------------------------------------------------------------------|--|----------------------------------------------------------------------------------------|-------------------------------------------------------------|-----------------------|-------------------------------------|-----------------------------|--|--|---------------------------------|--|------------------------------------------------------------------|-----------------------------------------------------------------|
| <p>Regular examinations combined with performing baseline diagnostics can help detect preclinical disease and serve as a reference point to track future trends. Consider performing baseline diagnostics (Table 1) at least annually, starting at age 7–10 years, with frequency increasing with age.</p>                                                                                                                                                                                                                                                                                                                                                                                                                                                                                                                                                                                                                                                                                                                                                                                                                                                                                                                                                                                                                                                                                                                                                                                                                                                                                                                                                                                                                                                                                                                     | <p>Los exámenes regulares combinados con la realización de diagnósticos de referencia pueden ayudar a detectar enfermedades preclínicas y servir como punto de referencia para rastrear tendencias futuras. Considere realizar diagnósticos de referencia (Tabla 1) al menos una vez al año, comenzando a la edad de 7 a 10 años, y la frecuencia aumenta con la edad.</p>                                                            |                  |                                                                                                     |                                                                                                                                                            |                                                                                                                                                                                                                       |                                                                                                                                                                                                     |                                                                                                                                                                                                                                  |  |                                                                                        |                                                             |                       |                                     |                             |  |  |                                 |  |                                                                  |                                                                 |
| <p><b>Table 1</b> Recommended diagnostics for senior cats</p> <table border="1"> <thead> <tr> <th>Baseline tests</th> <th>Ancillary tests*</th> </tr> </thead> <tbody> <tr> <td>Complete blood count: hematocrit, red blood cells, white blood cells, differential count, platelets</td> <td>Heartworm antibody/antigen<br/>Feline leukemia virus (FeLV)/feline immunodeficiency virus ELISA, FeLV provirus PCR<sup>28</sup><br/>Hematology slide review</td> </tr> <tr> <td>Serum biochemistry panel: total protein, albumin, globulin, alkaline phosphatase, alanine aminotransferase, glucose, blood urea nitrogen, creatinine, potassium, phosphorus, sodium and calcium as minimum parameters</td> <td>Ionized calcium/parathyroid hormone (PTH)/PTH-related peptide<br/>Cobalamin (B12)/folate<br/>Feline pancreatic-specific lipase<br/>Fructosamine<br/>NT-pro BNP<br/>SDMA<br/>Trypsin-like immunoreactivity</td> </tr> <tr> <td colspan="2"><i>Optional parameters often included in routinely available commercial panels: aspartate transaminase, gamma-glutamyl transferase, creatine kinase, total bilirubin, chloride, HCO<sub>3</sub> or CO<sub>2</sub>, magnesium</i></td> </tr> <tr> <td>Urinalysis: specific gravity, sediment, glucose, ketones, bilirubin, protein, urine pH</td> <td>Urine culture/sensitivity<br/>Urine protein:creatinine ratio</td> </tr> <tr> <td>Total T4<sup>†</sup></td> <td>Free T4/thyroid-stimulating hormone</td> </tr> <tr> <td>Blood pressure<sup>†</sup></td> <td></td> </tr> <tr> <td></td> <td>Fecal analysis (centrifugation)</td> </tr> <tr> <td></td> <td>Echocardiogram<br/>Electrocardiogram<br/>Radiography<br/>Ultrasound</td> </tr> </tbody> </table> <p>*May be indicated by patient health status and/or baseline test results<br/>†See discussion in text</p> | Baseline tests                                                                                                                                                                                                                                                                                                                                                                                                                        | Ancillary tests* | Complete blood count: hematocrit, red blood cells, white blood cells, differential count, platelets | Heartworm antibody/antigen<br>Feline leukemia virus (FeLV)/feline immunodeficiency virus ELISA, FeLV provirus PCR <sup>28</sup><br>Hematology slide review | Serum biochemistry panel: total protein, albumin, globulin, alkaline phosphatase, alanine aminotransferase, glucose, blood urea nitrogen, creatinine, potassium, phosphorus, sodium and calcium as minimum parameters | Ionized calcium/parathyroid hormone (PTH)/PTH-related peptide<br>Cobalamin (B12)/folate<br>Feline pancreatic-specific lipase<br>Fructosamine<br>NT-pro BNP<br>SDMA<br>Trypsin-like immunoreactivity | <i>Optional parameters often included in routinely available commercial panels: aspartate transaminase, gamma-glutamyl transferase, creatine kinase, total bilirubin, chloride, HCO<sub>3</sub> or CO<sub>2</sub>, magnesium</i> |  | Urinalysis: specific gravity, sediment, glucose, ketones, bilirubin, protein, urine pH | Urine culture/sensitivity<br>Urine protein:creatinine ratio | Total T4 <sup>†</sup> | Free T4/thyroid-stimulating hormone | Blood pressure <sup>†</sup> |  |  | Fecal analysis (centrifugation) |  | Echocardiogram<br>Electrocardiogram<br>Radiography<br>Ultrasound | <p>Consulte la página 72 de este documento para ver Tabla 1</p> |
| Baseline tests                                                                                                                                                                                                                                                                                                                                                                                                                                                                                                                                                                                                                                                                                                                                                                                                                                                                                                                                                                                                                                                                                                                                                                                                                                                                                                                                                                                                                                                                                                                                                                                                                                                                                                                                                                                                                 | Ancillary tests*                                                                                                                                                                                                                                                                                                                                                                                                                      |                  |                                                                                                     |                                                                                                                                                            |                                                                                                                                                                                                                       |                                                                                                                                                                                                     |                                                                                                                                                                                                                                  |  |                                                                                        |                                                             |                       |                                     |                             |  |  |                                 |  |                                                                  |                                                                 |
| Complete blood count: hematocrit, red blood cells, white blood cells, differential count, platelets                                                                                                                                                                                                                                                                                                                                                                                                                                                                                                                                                                                                                                                                                                                                                                                                                                                                                                                                                                                                                                                                                                                                                                                                                                                                                                                                                                                                                                                                                                                                                                                                                                                                                                                            | Heartworm antibody/antigen<br>Feline leukemia virus (FeLV)/feline immunodeficiency virus ELISA, FeLV provirus PCR <sup>28</sup><br>Hematology slide review                                                                                                                                                                                                                                                                            |                  |                                                                                                     |                                                                                                                                                            |                                                                                                                                                                                                                       |                                                                                                                                                                                                     |                                                                                                                                                                                                                                  |  |                                                                                        |                                                             |                       |                                     |                             |  |  |                                 |  |                                                                  |                                                                 |
| Serum biochemistry panel: total protein, albumin, globulin, alkaline phosphatase, alanine aminotransferase, glucose, blood urea nitrogen, creatinine, potassium, phosphorus, sodium and calcium as minimum parameters                                                                                                                                                                                                                                                                                                                                                                                                                                                                                                                                                                                                                                                                                                                                                                                                                                                                                                                                                                                                                                                                                                                                                                                                                                                                                                                                                                                                                                                                                                                                                                                                          | Ionized calcium/parathyroid hormone (PTH)/PTH-related peptide<br>Cobalamin (B12)/folate<br>Feline pancreatic-specific lipase<br>Fructosamine<br>NT-pro BNP<br>SDMA<br>Trypsin-like immunoreactivity                                                                                                                                                                                                                                   |                  |                                                                                                     |                                                                                                                                                            |                                                                                                                                                                                                                       |                                                                                                                                                                                                     |                                                                                                                                                                                                                                  |  |                                                                                        |                                                             |                       |                                     |                             |  |  |                                 |  |                                                                  |                                                                 |
| <i>Optional parameters often included in routinely available commercial panels: aspartate transaminase, gamma-glutamyl transferase, creatine kinase, total bilirubin, chloride, HCO<sub>3</sub> or CO<sub>2</sub>, magnesium</i>                                                                                                                                                                                                                                                                                                                                                                                                                                                                                                                                                                                                                                                                                                                                                                                                                                                                                                                                                                                                                                                                                                                                                                                                                                                                                                                                                                                                                                                                                                                                                                                               |                                                                                                                                                                                                                                                                                                                                                                                                                                       |                  |                                                                                                     |                                                                                                                                                            |                                                                                                                                                                                                                       |                                                                                                                                                                                                     |                                                                                                                                                                                                                                  |  |                                                                                        |                                                             |                       |                                     |                             |  |  |                                 |  |                                                                  |                                                                 |
| Urinalysis: specific gravity, sediment, glucose, ketones, bilirubin, protein, urine pH                                                                                                                                                                                                                                                                                                                                                                                                                                                                                                                                                                                                                                                                                                                                                                                                                                                                                                                                                                                                                                                                                                                                                                                                                                                                                                                                                                                                                                                                                                                                                                                                                                                                                                                                         | Urine culture/sensitivity<br>Urine protein:creatinine ratio                                                                                                                                                                                                                                                                                                                                                                           |                  |                                                                                                     |                                                                                                                                                            |                                                                                                                                                                                                                       |                                                                                                                                                                                                     |                                                                                                                                                                                                                                  |  |                                                                                        |                                                             |                       |                                     |                             |  |  |                                 |  |                                                                  |                                                                 |
| Total T4 <sup>†</sup>                                                                                                                                                                                                                                                                                                                                                                                                                                                                                                                                                                                                                                                                                                                                                                                                                                                                                                                                                                                                                                                                                                                                                                                                                                                                                                                                                                                                                                                                                                                                                                                                                                                                                                                                                                                                          | Free T4/thyroid-stimulating hormone                                                                                                                                                                                                                                                                                                                                                                                                   |                  |                                                                                                     |                                                                                                                                                            |                                                                                                                                                                                                                       |                                                                                                                                                                                                     |                                                                                                                                                                                                                                  |  |                                                                                        |                                                             |                       |                                     |                             |  |  |                                 |  |                                                                  |                                                                 |
| Blood pressure <sup>†</sup>                                                                                                                                                                                                                                                                                                                                                                                                                                                                                                                                                                                                                                                                                                                                                                                                                                                                                                                                                                                                                                                                                                                                                                                                                                                                                                                                                                                                                                                                                                                                                                                                                                                                                                                                                                                                    |                                                                                                                                                                                                                                                                                                                                                                                                                                       |                  |                                                                                                     |                                                                                                                                                            |                                                                                                                                                                                                                       |                                                                                                                                                                                                     |                                                                                                                                                                                                                                  |  |                                                                                        |                                                             |                       |                                     |                             |  |  |                                 |  |                                                                  |                                                                 |
|                                                                                                                                                                                                                                                                                                                                                                                                                                                                                                                                                                                                                                                                                                                                                                                                                                                                                                                                                                                                                                                                                                                                                                                                                                                                                                                                                                                                                                                                                                                                                                                                                                                                                                                                                                                                                                | Fecal analysis (centrifugation)                                                                                                                                                                                                                                                                                                                                                                                                       |                  |                                                                                                     |                                                                                                                                                            |                                                                                                                                                                                                                       |                                                                                                                                                                                                     |                                                                                                                                                                                                                                  |  |                                                                                        |                                                             |                       |                                     |                             |  |  |                                 |  |                                                                  |                                                                 |
|                                                                                                                                                                                                                                                                                                                                                                                                                                                                                                                                                                                                                                                                                                                                                                                                                                                                                                                                                                                                                                                                                                                                                                                                                                                                                                                                                                                                                                                                                                                                                                                                                                                                                                                                                                                                                                | Echocardiogram<br>Electrocardiogram<br>Radiography<br>Ultrasound                                                                                                                                                                                                                                                                                                                                                                      |                  |                                                                                                     |                                                                                                                                                            |                                                                                                                                                                                                                       |                                                                                                                                                                                                     |                                                                                                                                                                                                                                  |  |                                                                                        |                                                             |                       |                                     |                             |  |  |                                 |  |                                                                  |                                                                 |
| <p>The incidence of many diseases increases as cats age, and comorbidities are common. More robust data about disease incidence by age would assist veterinarians in determining the value and desired frequency of testing, but such data are lacking. Veterinarians must therefore rely on clinical judgment and client discussions specific to each individual patient.</p>                                                                                                                                                                                                                                                                                                                                                                                                                                                                                                                                                                                                                                                                                                                                                                                                                                                                                                                                                                                                                                                                                                                                                                                                                                                                                                                                                                                                                                                 | <p>La incidencia de muchas enfermedades aumenta a medida que los gatos envejecen y las comorbilidades son comunes. Datos más sólidos sobre la incidencia de enfermedades por edad ayudan a los veterinarios a determinar el valor y la frecuencia deseada de las pruebas, pero faltan esos datos. Los veterinarios deben confiar en el juicio clínico y las discusiones con el cliente específicas para cada paciente individual.</p> |                  |                                                                                                     |                                                                                                                                                            |                                                                                                                                                                                                                       |                                                                                                                                                                                                     |                                                                                                                                                                                                                                  |  |                                                                                        |                                                             |                       |                                     |                             |  |  |                                 |  |                                                                  |                                                                 |
| <p>Regardless of the cat’s age, more frequent or more expansive diagnostic evaluation (Table 1) is indicated if:</p> <ul style="list-style-type: none"> <li>* Any abnormalities are noted in the history or physical examination, even if baseline laboratory work appears normal.</li> <li>* Disease is suspected or revealed at routine veterinary visits.</li> </ul>                                                                                                                                                                                                                                                                                                                                                                                                                                                                                                                                                                                                                                                                                                                                                                                                                                                                                                                                                                                                                                                                                                                                                                                                                                                                                                                                                                                                                                                        | <p>Independientemente de la edad del gato, más frecuente o una evaluación diagnóstica más amplia (Tabla 1) está indicada si:</p> <ul style="list-style-type: none"> <li>* Cualquier anomalía se anota en la historia clínica o en el examen físico, incluso si el análisis de laboratorio inicial parece normal.</li> <li>* La enfermedad se sospecha o se revela en las visitas veterinarias de rutina.</li> </ul>                   |                  |                                                                                                     |                                                                                                                                                            |                                                                                                                                                                                                                       |                                                                                                                                                                                                     |                                                                                                                                                                                                                                  |  |                                                                                        |                                                             |                       |                                     |                             |  |  |                                 |  |                                                                  |                                                                 |

|                                                                                                                                                                                                                                                                                                                                                                                                                                                                                                                                                                                                                                                                                                   |                                                                                                                                                                                                                                                                                                                                                                                                                                                                                                                                                                                                                                                                                                                                                                                                      |
|---------------------------------------------------------------------------------------------------------------------------------------------------------------------------------------------------------------------------------------------------------------------------------------------------------------------------------------------------------------------------------------------------------------------------------------------------------------------------------------------------------------------------------------------------------------------------------------------------------------------------------------------------------------------------------------------------|------------------------------------------------------------------------------------------------------------------------------------------------------------------------------------------------------------------------------------------------------------------------------------------------------------------------------------------------------------------------------------------------------------------------------------------------------------------------------------------------------------------------------------------------------------------------------------------------------------------------------------------------------------------------------------------------------------------------------------------------------------------------------------------------------|
| <ul style="list-style-type: none"><li>* Comorbidities exist that require additional monitoring.</li><li>* Medications are prescribed.</li></ul>                                                                                                                                                                                                                                                                                                                                                                                                                                                                                                                                                   | <ul style="list-style-type: none"><li>* Existen comorbilidades que requieren un seguimiento adicional.</li><li>* Se recetan medicamentos.</li></ul>                                                                                                                                                                                                                                                                                                                                                                                                                                                                                                                                                                                                                                                  |
| <p>Assessment and diagnostic evaluation may be necessary every 3–6 months in very elderly patients, those receiving chronic medical management and patients with multiple comorbidities.</p> <p>When in doubt regarding suspected disease or subtle abnormalities, re-evaluate the patient to establish persistence and/or progression of the abnormality. Biometric data trends in the cat provide invaluable information and are more important than a single data point. Look at the whole patient and view trends in context. For example, progressive increases in BP over time may help differentiate between situational hypertension and true hypertension requiring medical therapy.</p> | <p>La valoración y la evaluación diagnóstica pueden ser necesarias cada 3 a 6 meses en pacientes muy ancianos, aquellos que reciben tratamiento médico crónico y pacientes con múltiples comorbilidades.</p> <p>En caso de duda con respecto a la sospecha de enfermedad o anomalías sutiles, reevalúe al paciente para establecer la persistencia y / o progresión de la anomalía. Las tendencias de datos biométricos en el gato proporcionan información invaluable y son más importantes que un solo punto de datos. Observar al paciente en su totalidad y observar las tendencias en contexto. Por ejemplo, los aumentos progresivos de la PA a lo largo del tiempo pueden ayudar a diferenciar entre la hipertensión situacional y la hipertensión verdadera que requiere terapia médica.</p> |
| <p>Biometric data can also be more powerful when multiple tests are used in conjunction. For example, when evaluating for the presence of CKD, using all available information – physical examination findings, serum creatinine, urine specific gravity (USG), symmetric dimethylarginine (SDMA), and diagnostic predictive algorithms, some of which are becoming available as proprietary services (eg, RenalTech; Antech Diagnostics) – is more powerful than simply evaluating serum creatinine concentration alone.</p>                                                                                                                                                                     | <p>Los datos biométricos también pueden ser más poderosos cuando se utilizan múltiples pruebas en conjunto. Por ejemplo, al evaluar la presencia de ERC, utilizar toda la información disponible: hallazgos del examen físico, creatinina sérica, gravedad específica de la orina (SG), dimetilarginina simétrica (ADMA) y algoritmos predictivos de diagnóstico, algunos de los cuales están disponibles como servicios propios. (p. ej., RenalTech; Antech Diagnostics): es más poderoso que simplemente evaluar la concentración de creatinina sérica sola.</p>                                                                                                                                                                                                                                   |

**Table 2** Identifying the subtle signs of pain at home and in the practice

|                 |                                    |                                                                                                                                                                                                                                                                                                                                                                                                                         |
|-----------------|------------------------------------|-------------------------------------------------------------------------------------------------------------------------------------------------------------------------------------------------------------------------------------------------------------------------------------------------------------------------------------------------------------------------------------------------------------------------|
| At home         | Patterns of behavior               | <ul style="list-style-type: none"> <li>✦ Changes in interactions with family, visitors, other family pets</li> <li>✦ Decreased appetite and food intake</li> <li>✦ Diminished play</li> <li>✦ Overgrowth of nails signaling decreased scratching behaviors</li> <li>✦ Changes in normal routines</li> </ul>                                                                                                             |
|                 | Mobility                           | <ul style="list-style-type: none"> <li>✦ Change in normal resting spaces</li> <li>✦ Increased sleeping</li> <li>✦ Decreased jumping</li> <li>✦ Difficulty climbing stairs, utilizing intermediate surfaces to get to higher surfaces or not going to higher surfaces at all</li> <li>✦ Sliding down the edge of surfaces to decrease jumping-down height</li> <li>✦ House-soiling</li> <li>✦ Lameness (rare)</li> </ul> |
|                 | Response to touch                  | <ul style="list-style-type: none"> <li>✦ Changes in petting preferences</li> <li>✦ Sudden dislike of grooming care, perhaps only over one specific physical location</li> <li>✦ Sudden dislike of being picked up</li> </ul>                                                                                                                                                                                            |
| In the practice | Personality                        | <ul style="list-style-type: none"> <li>✦ Change in demeanor: less or more approachable</li> <li>✦ Hiding in carrier when previously came out willingly</li> </ul>                                                                                                                                                                                                                                                       |
|                 | Mobility                           | <ul style="list-style-type: none"> <li>✦ Altered gait</li> <li>✦ Changes in jumping (no longer jumping onto examination table, difficulty getting onto examination room chair, etc)</li> <li>✦ Changes in exploratory behaviors</li> </ul>                                                                                                                                                                              |
|                 | Appearance                         | <ul style="list-style-type: none"> <li>✦ Evidence of muscle wasting</li> <li>✦ Evidence of increased or decreased grooming (alopecia, mats, dull coat)</li> <li>✦ Nail overgrowth</li> </ul>                                                                                                                                                                                                                            |
|                 | Response to touch                  | <ul style="list-style-type: none"> <li>✦ Objects to petting or examination touches</li> </ul>                                                                                                                                                                                                                                                                                                                           |
|                 | Ability to obtain biologic samples | <ul style="list-style-type: none"> <li>✦ Resistant to handling for blood or urine sampling</li> <li>✦ Changes in behavior compared with previously (eg, no longer comfortable for hindlimb blood draw)</li> </ul>                                                                                                                                                                                                       |

Consulte la página 73 de este documento para ver Tabla 2

## Management tools that optimize health in the aging cat

A healthy senior lifestyle can be supported by the veterinarian through education and conversation with the client. Consideration must be given to making the home environment senior-friendly, guiding the owner in understanding their senior cat's needs and providing nutritional advice. Where there are no contraindications, preventive care including routine vaccinations, parasite prevention and dental care should be recommended.

Osteoarthritis and spondylosis deformans are the two most common forms of degenerative joint disease (DJD) in cats (Figure 4).<sup>29</sup> Both conditions can cause pain and pain-associated behavioral changes.<sup>29,30</sup> Pain can be difficult to identify in cats. With proper guidance, clients can learn to detect changes in their cat's normal mobility and behavior patterns that are indicative of pain (Table 2). Mobility changes can be subtle, including jumping patterns, house-soiling, changes in sleeping locations, and increased sleeping (Figures 5 and 6).

## Herramientas de manejo que optimizan la salud del gato envejeciente

El veterinario puede apoyar un estilo de vida saludable a través de la educación y la conversación con el cliente. Se debe tener en cuenta la posibilidad de hacer que el entorno del hogar sea adecuado para las personas mayores, guiar al propietario para que comprenda las necesidades de su gato mayor y brindar consejos nutricionales. Cuando no existan contraindicaciones, se debe recomendar la atención preventiva, incluidas las vacunas de rutina, la prevención de parásitos y el cuidado dental son recomendados.

La osteoartritis y la espondilosis deformante son las dos formas más comunes de enfermedad degenerativa de las articulaciones (DJD) en los gatos (Figura 4).<sup>29</sup> Ambas afecciones pueden causar dolor y cambios de comportamiento asociados al dolor.<sup>29,30</sup> El dolor puede ser difícil de identificar en los gatos. Con la orientación adecuada, los clientes pueden aprender a detectar cambios en la movilidad normal y los patrones de comportamiento de su gato que sean indicativos de dolor (Tabla 2). Los cambios de movilidad pueden ser sutiles, incluidos los patrones de salto, la suciedad de la casa, los cambios en los lugares para dormir y el aumento del sueño (Figuras 5 y 6).

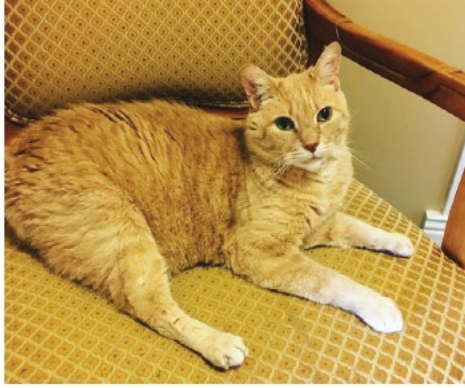

Figure 4. This 12-year-old cat with DJD is laying with stifle and hock in extension to be more comfortable. *Courtesy of Kelly St Denis*

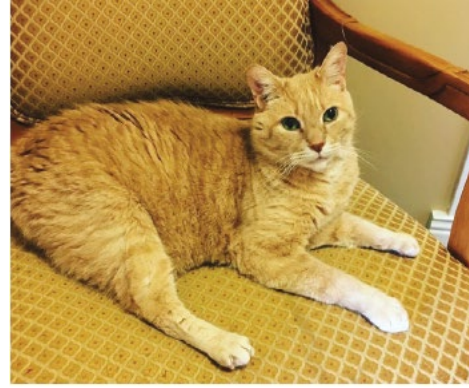

Figura 4. Este gato de 12 años con DJD está acostado con la rodilla y el corvejón en extensión para estar más cómodo. *Cortesía de Kelly St Denis*

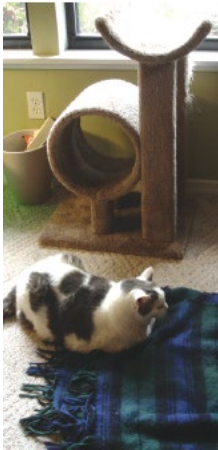

Figure 5. When this 11-year-old cat became unwilling to jump up to sit on the cat tree, he was examined and diagnosed with osteoarthritis. *Courtesy of Sheilah Robertson*

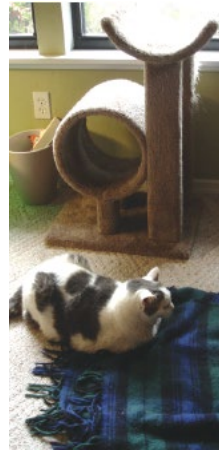

Figura 5. Cuando este gato de 11 años no quiso saltar para sentarse en el árbol para gatos, fue examinado y diagnosticado con osteoartritis. *Cortesía de Sheilah Robertson*

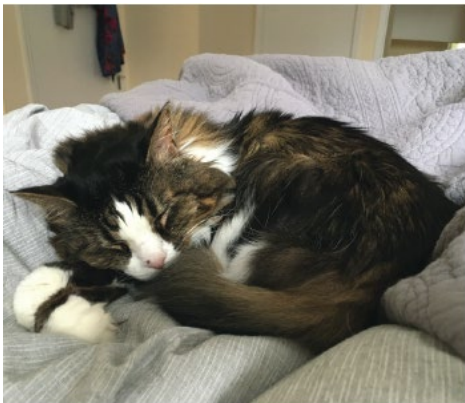

Figure 6. Subtle increases in sleeping pattern were noted for this 19-year-old cat. *Courtesy of Kathleen Neumann*

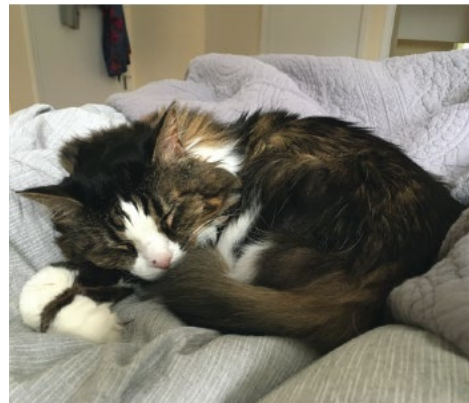

Figura 6. Se notaron aumentos sutiles en el patrón de sueño de este gato de 19 años. *Cortesía de Kathleen Neumann*

Because age carries an increased risk of DJD<sup>31</sup> and other changes, including cognitive dysfunction, decreased senses, becoming 'pre-frail' or frail, and potential health issues, all senior cats will require enhanced care at home. While age alone is not a risk factor for frailty, frailty does become more common as age advances. Tailor care to the individual cat, referencing the five pillars of a healthy feline environment (see later).<sup>8</sup> Educate clients about the importance of providing key resources including litter boxes, food dishes, drinking water, beds, scratching surfaces, hiding spaces and three-dimensional spaces in multiple locations throughout the house.<sup>8,9</sup> Encourage clients to provide items that support the aging cat, including night lights for improved visibility in darker areas, ramps and steps for easier access to favorite spaces (Figure 7) and a variety of resting surfaces and spaces. Low-sided, wide-based food and water bowls that do not interfere with the whiskers are ideal for seniors.<sup>32</sup> Senior cats should have safe access to food with minimal distractions and interruptions. Elevation of food bowls may benefit those with DJD, and warmed and/or aromatic foods can entice intake.

Debido a que la edad conlleva un mayor riesgo de DJD<sup>31</sup> y otros cambios, incluida la disfunción cognitiva, disminución de los sentidos, volverse "prefrágil" o "frágil" y posibles problemas de salud, todos los gatos mayores requerirán una mayor atención en el hogar. Si bien la edad por sí sola no es un factor de riesgo de fragilidad, la fragilidad se vuelve más común a medida que avanza la edad. Adapte el cuidado al gato individual, haciendo referencia a los cinco pilares de un entorno felino saludable (ver más adelante).<sup>8</sup> Educar a los clientes sobre la importancia de proporcionar recursos clave que incluyen cajas de arena, platos de comida, agua potable, camas, superficies para rascar, escondites y tres espacios dimensionales en múltiples ubicaciones en toda la casa.<sup>8,9</sup> Alentar a los clientes a proporcionar elementos que apoyen al gato envejecido, incluidas luces nocturnas para mejorar la visibilidad en áreas más oscuras, rampas y escalones para facilitar el acceso a los espacios favoritos (Figura 7) y una variedad de superficies y espacios de descanso. Los tazones de comida y agua de base ancha y bajos que no interfieran con los bigotes son ideales para las personas mayores.<sup>32</sup> Los gatos mayores deben tener acceso seguro a la comida con distracciones e interrupciones mínimas. La elevación de los platos de comida puede beneficiar a los gatos con DJD, y los alimentos calientes y / o aromáticos pueden atraer la ingesta.

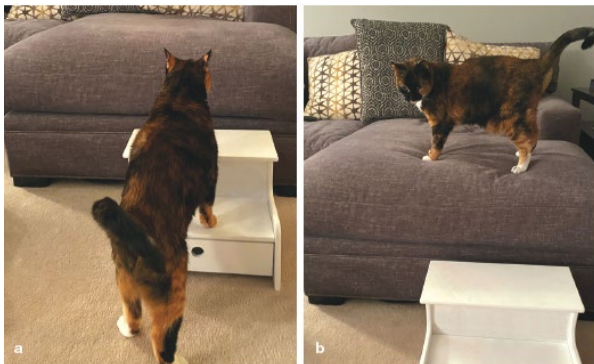

Figure 7. (a,b) This 14-year-old cat with painful DJD uses steps to access a favorite resting place. *Courtesy of Heather O'Steen*

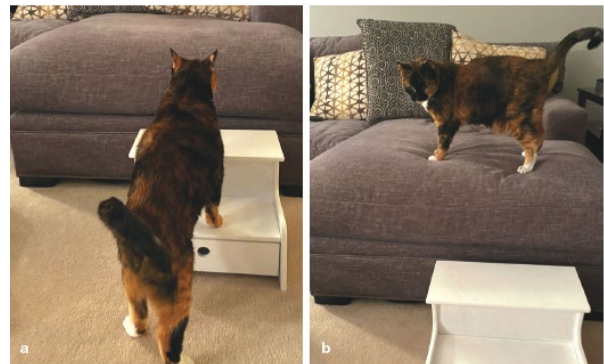

Figura 7. (a, b) Este gato de 14 años con DJD es doloroso usar escalones para acceder a su lugar de descanso favorito. *Cortesía de Heather O'Steen*

As frailty scales become more well defined (Box 2), interventions to keep the senior cat active and self-sufficient can be taken into the home environment. Although age alone is not a reliable predictor of frailty, many frailty factors become more common with advanced age.<sup>33</sup> As is established for human medicine frailty scales, frailty measurements should be able to identify frail subjects, be supported by a biologic causative theory, and reliably predict adverse clinical outcomes and patient response to therapy and stressors. In an effort to identify frailty factors, readers can utilize the 'phenotype scale frailty scale'<sup>34</sup> and 'index frailty scale'.<sup>35</sup> The former focuses on specific physiologic factors, and the latter allows for incorporation of psychological and social function to identify cognitive decline. Both are resources that are easy to use and repeat with serial assessments. With improved identification of frailty, we can establish corrective actions, physiologically and psychologically. With increased awareness and recognition, predictive factors can be identified.

A medida que las escalas de fragilidad se definan mejor (Recuadro 2), las intervenciones para mantener activo y autosuficiente al gato mayor pueden llevarse a cabo en el entorno del hogar. Aunque la edad por sí sola no es un predictor confiable de fragilidad, muchos factores de fragilidad se vuelven más comunes con la edad avanzada.<sup>33</sup> Como se establece para las escalas de fragilidad de la medicina humana, las mediciones de fragilidad deben poder identificar sujetos frágiles, estar respaldadas por una teoría causal biológica y predecir de forma fiable los resultados clínicos adversos y la respuesta del paciente a la terapia y los factores estresantes. En un esfuerzo por identificar factores de fragilidad, los lectores pueden utilizar la 'escala de fragilidad de la escala de fenotipo'<sup>34</sup> y la 'escala de fragilidad del índice'.<sup>35</sup> La primera se enfoca en factores fisiológicos específicos, y la última permite la incorporación de la función psicológica y social para identificar el deterioro cognitivo. Ambos son recursos que son fáciles de usar y se repiten con evaluaciones seriadas. Con una mejor identificación de la fragilidad, podemos establecer acciones correctivas, fisiológica y psicológicamente. Con una mayor concienciación y reconocimiento, se pueden identificar factores predictivos.

**Box 2**

**Frailty scales**

| Phenotype frailty scale                                                       |     |    | Index frailty scale                                                           |     |    |
|-------------------------------------------------------------------------------|-----|----|-------------------------------------------------------------------------------|-----|----|
| Medical conditions/problems present                                           | Yes | No | Medical conditions/problems present                                           | Yes | No |
| 1 Unintentional weight loss                                                   |     |    | 1 Physiologic deficits                                                        |     |    |
| 2 Weakness                                                                    |     |    | 2 Psychological (emotional) deficits                                          |     |    |
| 3 Poor endurance, early exhaustion                                            |     |    | 3 Cognitive (task-oriented) deficits                                          |     |    |
| 4 Slowness and low activity                                                   |     |    | 4 Deficits in social function                                                 |     |    |
| <b>Pre-frail:</b> 'Yes' to 2 out of 4. <b>Frail:</b> 'Yes' to 3 or 4 out of 4 |     |    | <b>Pre-frail:</b> 'Yes' to 2 out of 4. <b>Frail:</b> 'Yes' to 3 or 4 out of 4 |     |    |

Adapted from Fried et al<sup>34</sup>      Adapted from Mitnitski et al<sup>35</sup>

Consulte página 71 para ver Recuadro 2

Obesity in the cat is known to decrease life span;<sup>36</sup> however, with advancing age, weight loss is a more common occurrence.<sup>37</sup> BCSs of <5/9 and of 9/9 are negatively associated with survival and lifespan.<sup>38</sup> Routine nurse or technician visits, and educating clients to monitor body weight, BCS and MCS at home can improve early detection of negative trends.

La obesidad en el gato es conocida por reducir la esperanza de vida;<sup>36</sup> sin embargo, con el avance de la edad, la pérdida de peso es una ocurrencia más común.<sup>37</sup> BCS de <5/9 y de 9/9 se asocian negativamente con la supervivencia y el largo de vida.<sup>38</sup> Visitas de rutina con la enfermera o técnico y educar a los clientes para controlar el peso corporal, BCS y MCS en casa puede mejorar la detección temprana de tendencias negativas.

|                                                                                                                                                                                                                                                                                                                                                                                                                                                                                                                                                                                                                                                                                                                                                 |                                                                                                                                                                                                                                                                                                                                                                                                                                                                                                                                                                                                                                                                                                                                                                                                                                                                                                                  |
|-------------------------------------------------------------------------------------------------------------------------------------------------------------------------------------------------------------------------------------------------------------------------------------------------------------------------------------------------------------------------------------------------------------------------------------------------------------------------------------------------------------------------------------------------------------------------------------------------------------------------------------------------------------------------------------------------------------------------------------------------|------------------------------------------------------------------------------------------------------------------------------------------------------------------------------------------------------------------------------------------------------------------------------------------------------------------------------------------------------------------------------------------------------------------------------------------------------------------------------------------------------------------------------------------------------------------------------------------------------------------------------------------------------------------------------------------------------------------------------------------------------------------------------------------------------------------------------------------------------------------------------------------------------------------|
| <p>Gastrointestinal (GI) tract efficiency changes over time in the aging cat. Cats aged 7–11 years will require reduced caloric intake,<sup>39</sup> while cats 12 years of age and older will have increased daily energy requirements (DER).<sup>39,40</sup> Food intake can be negatively impacted by cognitive changes, dental disease and systemic disease.<sup>41</sup> Diminished GI tract function in seniors may also lead to consumption of smaller volumes of food at each feeding, with cats over 10 years requiring calorie-dense diets with highly digestible proteins offered in smaller, more frequent meals.<sup>9</sup> Resting energy requirements (RER) can be determined using the following calculation:<sup>42</sup></p> | <p>La eficiencia del tracto gastrointestinal (GI) cambia con el tiempo en el gato que envejece. Los gatos de 7 a 11 años requerirán una ingesta calórica reducida,<sup>39</sup> mientras que los gatos de 12 años o más tendrán mayores necesidades energéticas diarias (DER).<sup>39,40</sup> La ingesta de alimentos puede verse afectada negativamente por cambios cognitivos, enfermedades dentales y enfermedades sistémicas.<sup>41</sup> La función del tracto gastrointestinal disminuida en las personas mayores también puede llevar al consumo de volúmenes más pequeños de alimentos en cada alimentación, con gatos mayores de 10 años que requieren dietas densas en calorías con proteínas altamente digestibles ofrecidas en comidas más pequeñas y frecuentes.<sup>9</sup> Los requerimientos de energía en reposo (RER) se pueden determinar utilizando el siguiente cálculo:<sup>42</sup></p> |
| <p style="text-align: center;"><b>RER (kcal) = 30 x body weight (kg) + 70</b></p>                                                                                                                                                                                                                                                                                                                                                                                                                                                                                                                                                                                                                                                               | <p style="text-align: center;"><b>RER (kcal) = 30 x peso corporal (kg) + 70</b></p>                                                                                                                                                                                                                                                                                                                                                                                                                                                                                                                                                                                                                                                                                                                                                                                                                              |
| <p>To determine DER add a factor of 10–20%, although some senior cats may require a factor of 25%.<sup>43</sup> Feeding amounts can be determined based on the energy density and nutrients of the food being fed. Guide clients to record actual intake and report any changes. Slower transit times may predispose senior cats to stool dehydration and constipation.<sup>32</sup> In some cases, use of specific diets<sup>44</sup> or addition of polyethylene glycol 3350 daily to food can be beneficial in promoting good stool consistency.<sup>45</sup></p>                                                                                                                                                                            | <p>Para determinar el DER, agregue un factor del 10 al 20%, aunque algunos gatos mayores pueden requerir un factor del 25%.<sup>43</sup> Las cantidades de alimento se pueden determinar en función de la densidad energética y los nutrientes del alimento que se alimenta. Guíe a los clientes para que registren la ingesta actual e informen cualquier cambio. Los tiempos de tránsito de ingesta más lentos pueden predisponer a los gatos mayores a la deshidratación de las heces y al estreñimiento.<sup>32</sup> En algunos casos, el uso de dietas específicas<sup>44</sup> o la adición diaria de polietilenglicol 3350 a la comida puede ser beneficioso para promover una buena consistencia de las heces.<sup>45</sup></p>                                                                                                                                                                         |

|                                                                                                                                                                                                                                                                                                                                                                                                                                                                                                                                                                                                                                                                                                                               |                                                                                                                                                                                                                                                                                                                                                                                                                                                                                                                                                                                                                                                                                                                                                                                                                            |
|-------------------------------------------------------------------------------------------------------------------------------------------------------------------------------------------------------------------------------------------------------------------------------------------------------------------------------------------------------------------------------------------------------------------------------------------------------------------------------------------------------------------------------------------------------------------------------------------------------------------------------------------------------------------------------------------------------------------------------|----------------------------------------------------------------------------------------------------------------------------------------------------------------------------------------------------------------------------------------------------------------------------------------------------------------------------------------------------------------------------------------------------------------------------------------------------------------------------------------------------------------------------------------------------------------------------------------------------------------------------------------------------------------------------------------------------------------------------------------------------------------------------------------------------------------------------|
| <p>The 2020 AAHA/AAFP Feline Vaccination Task Force recommended individualized vaccination plans based on five risk assessment variables: age and life stage, health status, agent exposure, history and immunodeficiency.<sup>46</sup> Healthy senior cats and senior cats with controlled disease are eligible for vaccination based on these criteria. Although poor health status may increase the risk of side effects, the same cat may be more susceptible to infectious disease and may benefit from vaccination. The veterinarian will need to evaluate these risk variables on a patient-by-patient basis. Refer to the ‘2020 AAHA/AAFP Feline Vaccination Guidelines’<sup>46</sup> for additional information.</p> | <p>El grupo de trabajo de vacunación felina de la AAHA / AAHP de 2020 recomendó planes de vacunación individualizados basados en cinco variables de evaluación de riesgos: edad y etapa de vida, estado de salud, exposición al agente, antecedentes e inmunodeficiencia.<sup>46</sup> Los gatos mayores sanos y los gatos mayores con enfermedades controladas son elegibles para la vacunación basada en estos criterios. Aunque un mal estado de salud puede aumentar el riesgo de efectos secundarios, el mismo gato puede ser más susceptible a enfermedades infecciosas y puede beneficiarse de la vacunación. El veterinario deberá evaluar estas variables de riesgo paciente por paciente. Consulte la “Guía de vacunación felina de la AAHA / AAHP de 2020”<sup>46</sup> para obtener información adicional.</p> |
| <p>Regular, broad spectrum parasite prevention is recommended by the Companion Animal Parasite Council, regardless of lifestyle. Exposure risks increase when cats spend any time outside, including on patios or in enclosures, or travel for grooming, boarding or other care, and when other household pets have an indoor–outdoor lifestyle. A strictly indoor lifestyle does not eliminate exposure risks, however. Routine protection against common intestinal parasites, heartworm, fleas, and in some cases ticks, is recommended.</p>                                                                                                                                                                               | <p>El concilio de parásitos de animales de compañía recomienda la prevención regular de parásitos de amplio espectro, independientemente del estilo de vida. Los riesgos de exposición aumentan cuando los gatos pasan algún tiempo afuera, incluso en patios o en lugares encerrados, o viajan para asearse, alojarse u otros cuidados, y cuando otras mascotas domésticas tienen un estilo de vida interior-exterior. Sin embargo, un estilo de vida estrictamente en interiores no elimina los riesgos de exposición. Se recomienda la protección de rutina contra los parásitos intestinales comunes, el gusano del corazón, las pulgas y, en algunos casos, las garrapatas.</p>                                                                                                                                       |



|                                                                                                                                                                                                                                                                                                                                                                                                                                                                                                                                                                                                                                                                                                                                                                                                                                                                                                                                                                                                                                                                                                                                                                                                                                                                 |                                                                                                                                                                                                                                                                                                                                                                                                                                                                                                                                                                                                                                                                                                                                                                                                                                                                                                                                                                                                                                                                                                                                                                                                                                                                                                                                                                                                                                                                                                                                     |
|-----------------------------------------------------------------------------------------------------------------------------------------------------------------------------------------------------------------------------------------------------------------------------------------------------------------------------------------------------------------------------------------------------------------------------------------------------------------------------------------------------------------------------------------------------------------------------------------------------------------------------------------------------------------------------------------------------------------------------------------------------------------------------------------------------------------------------------------------------------------------------------------------------------------------------------------------------------------------------------------------------------------------------------------------------------------------------------------------------------------------------------------------------------------------------------------------------------------------------------------------------------------|-------------------------------------------------------------------------------------------------------------------------------------------------------------------------------------------------------------------------------------------------------------------------------------------------------------------------------------------------------------------------------------------------------------------------------------------------------------------------------------------------------------------------------------------------------------------------------------------------------------------------------------------------------------------------------------------------------------------------------------------------------------------------------------------------------------------------------------------------------------------------------------------------------------------------------------------------------------------------------------------------------------------------------------------------------------------------------------------------------------------------------------------------------------------------------------------------------------------------------------------------------------------------------------------------------------------------------------------------------------------------------------------------------------------------------------------------------------------------------------------------------------------------------------|
| <p>Dental disease and associated pain in cats is often unnoticed at home. Clinical signs may include head shaking, pawing at the mouth, tongue thrusting, hypersalivation, or rubbing the head along the ground,<sup>47</sup> but signs are often subtle and not explicitly linked with dental disease. Cats may display vague alterations in activity, appetite and interactions with family, and/or other subtle signs of pain (Table 2). The risk of periodontal disease increases with age,<sup>48</sup> as does the risk of tooth resorption,<sup>49,50</sup> making a full dental evaluation an essential component of every senior examination. In the awake patient, this includes extraoral examination of the head as well as intraoral examination.<sup>47</sup> Examination of the entire dental arcade can be difficult in awake cats, and lesions can be missed. For example, tooth resorption is commonly found first in 307 and 407,<sup>49</sup> yet assessing these mandibular premolars can be a challenge in the conscious cat. Cat friendly handling techniques can improve this process.<sup>11</sup> A video showing cat friendly tips for thorough feline dental examinations is included as supplementary material (see page 631).</p> | <p>La enfermedad dental y el dolor asociado en los gatos a menudo pasan desapercibidos en casa. Los signos clínicos pueden incluir sacudir la cabeza, frotarse la boca con su pata, empujar la lengua, hipersalivación o frotar la cabeza contra el suelo,<sup>47</sup> pero los signos a menudo son sutiles y no están explícitamente relacionados con la enfermedad dental. Los gatos pueden mostrar vagas alteraciones en la actividad, el apetito y las interacciones con la familia y / u otros signos sutiles de dolor (Tabla 2). El riesgo de enfermedad periodontal aumenta con la edad,<sup>48</sup> al igual que el riesgo de reabsorción dental,<sup>49,50</sup> lo que hace que una evaluación dental completa sea un componente esencial de todos los exámenes de los gatos ancianos. En el paciente despierto, esto incluye un examen extraoral de la cabeza así como un examen intraoral.<sup>47</sup> El examen de toda la arcada dentaria puede ser difícil en gatos despiertos y las lesiones pueden pasar desapercibidas. Por ejemplo, la reabsorción dental se encuentra comúnmente primero en 307 y 407,<sup>49</sup> pero la evaluación de estos premolares mandibulares puede ser un desafío en el gato consciente. Las técnicas de manipulación amigables con los gatos pueden mejorar este proceso.<sup>11</sup> Un video que muestra consejos amigables con los gatos para exámenes dentales completos en felinos es incluido como material suplementario (Consulte la página 57 de este documento.).</p> |
| <p>Complete dental evaluation requires anesthesia and includes thorough extraoral and intraoral examinations as well as dental radiography.<sup>47</sup> Advancing age should not be a limiting factor in proceeding with dental care under anesthesia.<sup>51</sup></p>                                                                                                                                                                                                                                                                                                                                                                                                                                                                                                                                                                                                                                                                                                                                                                                                                                                                                                                                                                                        | <p>La evaluación dental completa requiere anestesia e incluye exámenes extraorales e intraorales completos, así como radiografía dental.<sup>47</sup> La edad avanzada no debe ser un factor limitante para proceder con el cuidado dental bajo anestesia.<sup>51</sup></p>                                                                                                                                                                                                                                                                                                                                                                                                                                                                                                                                                                                                                                                                                                                                                                                                                                                                                                                                                                                                                                                                                                                                                                                                                                                         |

| <b>Concurrent issues to consider in the aging cat</b>                                                                                                                                                                                                                                                                                                                                                                                                                                                                                                                                                                                                                                                                                                                                                                                                                                                                                                                                                                                                                                                                                                                                                             | <b>Problemas concurrentes a considerar en el gato envejecido</b>                                                                                                                                                                                                                                                                                                                                                                                                                                                                                                                                                                                                                                                                                                                                                                                                                                                                                                                                                                                                                                                                                                                                                                                                                                                                                                                                                                    |
|-------------------------------------------------------------------------------------------------------------------------------------------------------------------------------------------------------------------------------------------------------------------------------------------------------------------------------------------------------------------------------------------------------------------------------------------------------------------------------------------------------------------------------------------------------------------------------------------------------------------------------------------------------------------------------------------------------------------------------------------------------------------------------------------------------------------------------------------------------------------------------------------------------------------------------------------------------------------------------------------------------------------------------------------------------------------------------------------------------------------------------------------------------------------------------------------------------------------|-------------------------------------------------------------------------------------------------------------------------------------------------------------------------------------------------------------------------------------------------------------------------------------------------------------------------------------------------------------------------------------------------------------------------------------------------------------------------------------------------------------------------------------------------------------------------------------------------------------------------------------------------------------------------------------------------------------------------------------------------------------------------------------------------------------------------------------------------------------------------------------------------------------------------------------------------------------------------------------------------------------------------------------------------------------------------------------------------------------------------------------------------------------------------------------------------------------------------------------------------------------------------------------------------------------------------------------------------------------------------------------------------------------------------------------|
| <p><b>Anesthesia</b></p> <p>Procedures including diagnostic ultrasonography, endoscopy, feeding tube placement and surgery require sedation or anesthesia. Historical data indicate higher mortality rates in cats compared with dogs, as well as in cats over 12 years of age (comparator group 1–5 years).<sup>52</sup> However, risk factors have been identified, and anesthesia practices changed to mitigate adverse outcomes. The ‘AAFP Feline Anesthesia Guidelines’<sup>53</sup> highlight the importance of stress reduction (eg, pre-visit gabapentin, cat friendly handling<sup>11</sup> and nursing<sup>54</sup>) in the perioperative period. Tachycardia is not well tolerated, and diminished cardiac reserve renders the older patient less able to respond to fluid losses or overload. Recommended fluid rates for cats during anesthesia are 3 ml/kg/h to reflect feline blood volume (50–60 ml/kg) and the prevalence of hypertrophic cardiomyopathy; note that this is lower than rates for dogs.<sup>53</sup> The type and volume of fluid used depend on many factors, including the patient’s signalment, physical condition, and the length and type of the procedure.<sup>55</sup></p> | <p><b>Anestesia</b></p> <p>Los procedimientos que incluyen ecografía diagnóstica, endoscopia, colocación de sonda de alimentación y cirugía requieren sedación o anestesia. Los datos históricos indican tasas de mortalidad más altas en gatos en comparación con perros, así como en gatos mayores de 12 años (grupo comparador 1-5 años).<sup>52</sup> Sin embargo, se han identificado factores de riesgo y se han modificado las prácticas de anestesia para mitigar los resultados adversos. La “Guía de anestesia felina de la AAFP”<sup>53</sup> destaca la importancia de la reducción del estrés (p. ej., Gabapentina antes de la visita, manejo amigable con los gatos<sup>11</sup> y amamantamiento<sup>54</sup>) en el período perioperatorio. La taquicardia no se tolera bien y la reserva cardíaca disminuida hace que el paciente mayor sea menos capaz para responder a pérdidas de fluidos o sobrecargas. Las tasas de líquido recomendadas para gatos durante la anestesia son 3 ml / kg / h para reflejar el volumen de sangre felina (50-60 ml / kg) y la prevalencia de miocardiopatía hipertrófica; tenga en cuenta esta es más baja que las tasas para los perros.<sup>53</sup> El tipo y el volumen de líquido utilizado dependen de muchos factores, incluida la observación de las marcas características del paciente, la condición física y la duración y el tipo del procedimiento.<sup>55</sup></p> |

|                                                                                                                                                                                                                                                                                                                                                                                                                                                                                                                                                                                                                                                                                                                                                                                                                                             |                                                                                                                                                                                                                                                                                                                                                                                                                                                                                                                                                                                                                                                                                                                                                                                                                                                                                                                                                                          |
|---------------------------------------------------------------------------------------------------------------------------------------------------------------------------------------------------------------------------------------------------------------------------------------------------------------------------------------------------------------------------------------------------------------------------------------------------------------------------------------------------------------------------------------------------------------------------------------------------------------------------------------------------------------------------------------------------------------------------------------------------------------------------------------------------------------------------------------------|--------------------------------------------------------------------------------------------------------------------------------------------------------------------------------------------------------------------------------------------------------------------------------------------------------------------------------------------------------------------------------------------------------------------------------------------------------------------------------------------------------------------------------------------------------------------------------------------------------------------------------------------------------------------------------------------------------------------------------------------------------------------------------------------------------------------------------------------------------------------------------------------------------------------------------------------------------------------------|
| <p>As humans age, the functional capacity of major organs diminishes; the decrease in size of, and blood flow to, the liver and kidneys results in delayed metabolism and excretion of drugs.<sup>56</sup> The decrease in grey matter lowers anesthetic requirements. Loss of muscle mass and diminished thermoregulatory control renders older humans susceptible to hypothermia, which further decreases drug metabolism and prolongs anesthetic recovery.<sup>57</sup> These changes affecting drug metabolism likely occur in cats. If adjustments are not made based on these age-related physiologic changes, the risk of anesthetic overdose dramatically increases.</p>                                                                                                                                                            | <p>A medida que los seres humanos envejecen, la capacidad funcional de los órganos principales disminuye; la disminución del tamaño y del flujo sanguíneo hacia el hígado y los riñones resulta en un retraso en el metabolismo y la excreción de los fármacos.<sup>56</sup> La disminución de la materia gris reduce las necesidades anestésicas. La pérdida de masa muscular y la disminución del control termorregulador hacen que los seres humanos mayores sean susceptibles a la hipotermia, lo que reduce aún más el metabolismo del fármaco y prolonga la recuperación de la anestesia.<sup>57</sup> Estos cambios que afectan al metabolismo del fármaco probablemente se produzcan en los gatos. Si no se hacen ajustes basados en estos cambios fisiológicos relacionados con la edad, el riesgo de sobredosis de anestésico aumenta drásticamente.</p>                                                                                                       |
| <p><b>Hypertension</b></p> <p>Hypertension in the cat is well recognized but, due to a paucity of screening, is likely underdiagnosed.<sup>17</sup> Feline hypertension can occur as a primary/idiopathic change, secondary to other disease or secondary to situational stress.<sup>16</sup></p> <p>Primary/idiopathic hypertension is uncommon in cats and thus detection of hypertension should prompt an investigation for underlying disease. Secondary hypertension may develop in association with CKD, hyperthyroidism, primary hyperaldosteronism, DM, pheochromocytomas and pituitary hyperadrenocorticism. The reader is referred to the AAFP Hypertension Educational Toolkit<sup>18</sup> and the ‘ISFM Consensus Guidelines on the Diagnosis and Management of Hypertension in Cats’<sup>17</sup> for additional details.</p> | <p><b>Hipertensión</b></p> <p>La hipertensión en el gato está bien reconocida pero, debido a la escasez de exámenes de detección, es probable que esta sea poco diagnosticada.<sup>17</sup> La hipertensión felina puede ocurrir como un cambio primario / idiopático, secundario a otra enfermedad o secundario al estrés situacional.<sup>16</sup></p> <p>La hipertensión primaria / idiopática es poco común en gatos y, por lo tanto, la detección de hipertensión debe impulsar una investigación de la enfermedad subyacente. La hipertensión secundaria puede desarrollarse en asociación con ERC, hipertiroidismo, hiperaldosteronismo primario, DM, feocromocitomas e hiperadrenocorticismo hipofisario. Se remite al lector al “Kit de herramientas educativas sobre hipertensión de la AAFP”<sup>18</sup> y la “Guía de consenso de la ISFM sobre el diagnóstico y el manejo de la hipertensión en gatos”<sup>17</sup> para obtener detalles adicionales.</p> |
| <p><b>Chronic kidney disease</b></p> <p>Kidney disease is common in older cats, and often begins in mature adult cats. Diagnosis and management are well documented.<sup>58,59</sup> However, a few specifics deserve mention:</p>                                                                                                                                                                                                                                                                                                                                                                                                                                                                                                                                                                                                          | <p><b>Enfermedad renal crónica</b></p> <p>La enfermedad renal es común en gatos mayores y, a menudo, comienza en gatos adultos maduros. El diagnóstico y el manejo están bien documentados.<sup>58,59</sup> Sin embargo, algunos detalles merecen mención:</p>                                                                                                                                                                                                                                                                                                                                                                                                                                                                                                                                                                                                                                                                                                           |

|                                                                                                                                                                                                                                                                                                                                                                                                                                                                                                                                                                                                                                                                                                                                                                                                                                                                          |                                                                                                                                                                                                                                                                                                                                                                                                                                                                                                                                                                                                                                                                                                                                                                                                                                                                                                                                                                                                                               |
|--------------------------------------------------------------------------------------------------------------------------------------------------------------------------------------------------------------------------------------------------------------------------------------------------------------------------------------------------------------------------------------------------------------------------------------------------------------------------------------------------------------------------------------------------------------------------------------------------------------------------------------------------------------------------------------------------------------------------------------------------------------------------------------------------------------------------------------------------------------------------|-------------------------------------------------------------------------------------------------------------------------------------------------------------------------------------------------------------------------------------------------------------------------------------------------------------------------------------------------------------------------------------------------------------------------------------------------------------------------------------------------------------------------------------------------------------------------------------------------------------------------------------------------------------------------------------------------------------------------------------------------------------------------------------------------------------------------------------------------------------------------------------------------------------------------------------------------------------------------------------------------------------------------------|
| <p>* Clinical signs of CKD can be overlooked by cat owners, and may include polyuria, polydipsia, inappetence, nausea, constipation, poor haircoat, weight loss and muscle wasting.</p> <p>* Routine laboratory work (screening and evaluation of trends) may reveal early disease. Some patients with serum creatinine concentrations within published reference intervals may actually have CKD. Evaluation of combined data, including creatinine, USG, SDMA, body weight, MCS and hydration status, is important for disease determination. Persistent serum creatinine &gt;1.6 mg/dl (&gt;140 µmol/l), USG &lt;1.035, and SDMA &gt;14 µg/dl are indicative of renal dysfunction.</p>                                                                                                                                                                                | <p>* Los signos clínicos de la ERC pueden pasarse por alto por los dueños de gatos, y puede incluir poliuria, polidipsia, inapetencia, náuseas, estreñimiento, pobre pelaje, pérdida de peso y atrofia muscular.</p> <p>* Las pruebas de laboratorio de rutina (detección y evaluación de tendencias) pueden revelar una enfermedad temprana. Algunos pacientes con concentraciones de creatinina sérica dentro de los intervalos de referencia publicados pueden tener ERC. La evaluación de los datos combinados, que incluyen creatinina, SG, ADMA, peso corporal, MCS y estado de hidratación, es importante para la determinación de la enfermedad. La persistencia de creatinina sérica &gt; 1,6 mg / dl (&gt;140 µmol / l), SG &lt;1,035 y ADMA &gt;14 µg / dl son indicativos de disfunción renal.</p>                                                                                                                                                                                                                |
| <p>* Interpretation of urinalysis results, particularly USG and protein, is of particular importance in senior cats. Cystocentesis allows for greatest accuracy. If USG is &lt;1.035, then measurement should be repeated on a subsequent sample to confirm persistence. Determine urine protein:creatinine ratio (UPCR) to quantify proteinuria when appropriate (ie, no gross hematuria or inflammation is present).</p> <p>* After diagnosis of CKD is confirmed and the patient is stable and hydrated, International Renal Interest Society (IRIS) staging is performed. Staging is based on repeated assessment of serum creatinine (with consideration for SDMA) and substaging based on BP and UPCR. Staging the patient aids in management of disease, and substaging helps in determining when intervention for hypertension and proteinuria is indicated.</p> | <p>* La interpretación de los resultados del análisis de orina, particularmente el SG y las proteínas, es de particular importancia en los gatos mayores. La cistocentesis permite una mayor precisión. Si SG es &lt;1.035, la medición debe repetirse en una muestra posterior para confirmar la persistencia. Determinar el cociente proteína: creatinina en orina (UPCR) para cuantificar la proteinuria cuando sea apropiado (p. ej.: no hay hematuria macroscópica ni inflamación).</p> <p>* Una vez que se confirma el diagnóstico de ERC y el paciente está estable e hidratado, se realiza la estadificación de la Sociedad Internacional de Interés Renal (IRIS). La estadificación se basa en la evaluación repetida de la creatinina sérica (teniendo en cuenta la ADMA) y la subestadificación se basa en PA y UPCR. La estadificación del paciente ayuda en el manejo de la enfermedad y la subestadificación ayuda a determinar cuándo está indicada la intervención para la hipertensión y la proteinuria.</p> |
| <p>* Evaluate nutrition, including a complete dietary history and assessment of caloric intake adequacy. Determine body weight, BCS and MCS. Ask open-ended questions about how the cat is eating. Address poor appetite and optimize caloric intake with anti-nausea and appetite stimulant therapy.<sup>60</sup></p>                                                                                                                                                                                                                                                                                                                                                                                                                                                                                                                                                   | <p>* Evaluar la nutrición, incluyendo un historial dietético completo y una evaluación de la adecuación de la ingesta calórica. Determine el peso corporal, BCS y MCS. Haga preguntas abiertas sobre cómo come el gato. Aborde la falta de apetito y optimice la ingesta calórica con una terapia estimulante contra las náuseas y el apetito.<sup>60</sup></p>                                                                                                                                                                                                                                                                                                                                                                                                                                                                                                                                                                                                                                                               |

|                                                                                                                                                                                                                                                                                                                                                                                                                                                                                                                                                                                                                                                                                                                                                                                                                                               |                                                                                                                                                                                                                                                                                                                                                                                                                                                                                                                                                                                                                                                                                                                                                                                                                                                                                                                                          |
|-----------------------------------------------------------------------------------------------------------------------------------------------------------------------------------------------------------------------------------------------------------------------------------------------------------------------------------------------------------------------------------------------------------------------------------------------------------------------------------------------------------------------------------------------------------------------------------------------------------------------------------------------------------------------------------------------------------------------------------------------------------------------------------------------------------------------------------------------|------------------------------------------------------------------------------------------------------------------------------------------------------------------------------------------------------------------------------------------------------------------------------------------------------------------------------------------------------------------------------------------------------------------------------------------------------------------------------------------------------------------------------------------------------------------------------------------------------------------------------------------------------------------------------------------------------------------------------------------------------------------------------------------------------------------------------------------------------------------------------------------------------------------------------------------|
| <p>* Feeding a phosphorus-restricted 'renal' diet has been shown to improve CKD—mineral and bone disorder, reduce uremic episodes, and increase survival times.<sup>61</sup> Canned diets provide the benefit of improving hydration. If a cat will not eat a commercial renal diet, a home-cooked diet can be formulated with the help of a nutritionist. Alternatively, a feeding tube can be placed to optimize nutrition and hydration, and assist in medication administration.<sup>61</sup></p>                                                                                                                                                                                                                                                                                                                                         | <p>* Se ha demostrado que la alimentación con una dieta "renal" restringida en fósforo mejora la ERC, el trastorno mineral y óseo, reduce los episodios urémicos y aumenta los tiempos de supervivencia.<sup>61</sup> Las dietas enlatadas brindan el beneficio de mejorar la hidratación. Si un gato no quiere comer una dieta renal comercial, se puede formular una dieta casera con la ayuda de un nutricionista. Alternativamente, se puede colocar una sonda de alimentación para optimizar la nutrición y la hidratación y ayudar en la administración de medicamentos.<sup>61</sup></p>                                                                                                                                                                                                                                                                                                                                          |
| <p>* Address dehydration to promote renal blood flow and prevent constipation.</p> <p>* As CKD is the leading cause of secondary hypertension, BP should be monitored and hypertension should be addressed medically when identified with a goal of returning BP to the normal range.</p> <p>* Investigate and treat electrolyte abnormalities, such as hypokalemia and hyperphosphatemia.</p> <p>* Evaluate for renal proteinuria, which may play a role in disease progression and has been shown to be a negative predictor of survival.<sup>62–64</sup> Persistently elevated proteinuria (UPCR &gt;0.4) determined to be renal in origin merits therapeutic intervention.</p> <p>* Monitor for anemia, which is common in CKD and is a negative predictor of survival.<sup>63,64</sup> Moderate to severe anemia warrants treatment.</p> | <p>* Abordar la deshidratación para promover el flujo sanguíneo renal y prevenir el estreñimiento.</p> <p>* Dado que la ERC es la causa principal de hipertensión secundaria, se debe controlar la presión arterial y tratar la hipertensión médicamente cuando se identifica con el objetivo de devolver la presión arterial al rango normal.</p> <p>* Investigar y tratar anomalías electrolíticas, como hipopotasemia e hiperfosfatemia.</p> <p>* Evaluar la proteinuria renal, que puede desempeñar un papel en la progresión de la enfermedad y ha demostrado ser un predictor negativo de supervivencia.<sup>62–64</sup> La proteinuria persistentemente elevada (UPCR &gt;0,4) que se determina que es de origen renal amerita intervención terapéutica.</p> <p>* Monitorear la anemia, que es común en la ERC y es un predictor negativo de supervivencia.<sup>63,64</sup> La anemia moderada a severa requiere tratamiento.</p> |
| <p>* Perform urinalysis and urine culture (when indicated based on urine sediment clinical signs or low USG) to monitor for urinary tract infection (UTI), which is more common in cats with CKD.<sup>65</sup> Low USG is considered a potential factor in increased risk of subclinical UTI even if urine sediment is inactive.<sup>66</sup></p> <p>* When prescribing therapies to CKD patients (eg, oral mirtazapine, gabapentin, fluoroquinolones), keep in mind that renal dysfunction may require dose reduction or alteration of dosing interval.<sup>67,68</sup></p>                                                                                                                                                                                                                                                                  | <p>* Realizar un análisis de orina y un cultivo de orina (cuando esté indicado basado en los signos clínicos del sedimento de orina o de un USG bajo) para controlar la infección del tracto urinario (ITU), que es más común en gatos con ERC.<sup>65</sup> Un USG bajo se considera un factor potencial en un mayor riesgo de ITU subclínica incluso si el sedimento de orina está inactivo.<sup>66</sup></p> <p>* Cuando prescriba terapias a pacientes con ERC (p. ej., Mirtazapina oral, gabapentina, fluoroquinolonas), tenga en cuenta que la disfunción renal puede requerir una reducción de la dosis o una alteración del intervalo de dosificación.<sup>67,68</sup></p>                                                                                                                                                                                                                                                       |

\* Once the patient is stabilized, continue monitoring every 3–6 months or more often if indicated depending on individual patient factors.

\* Balance quality of life with therapeutic interventions to develop a plan that works for clients and patients.

\* Una vez que el paciente esté estabilizado, continúe con la monitorización cada 3 a 6 meses o con más frecuencia si está indicado según los factores individuales del paciente.

\* Equilibrar la calidad de vida con intervenciones terapéuticas para desarrollar un plan que funcione para clientes y pacientes.

### Hyperthyroidism

Hyperthyroidism affects 10% of cats over 10 years of age.<sup>69</sup> It is treatable, even curable, if detected early. FHT is diagnosed by a combination of clinical signs (eg, weight loss, polyphagia, polyuria, polydipsia, increased vocalization, agitation, increased activity, vomiting, diarrhea, unkempt haircoat, apathy, inappetence and lethargy)<sup>70</sup> and elevated serum thyroid hormone (T4) concentration. Identifying trends in T4 is valuable in establishing an early diagnosis of FHT. Common myths pertaining to the treatment and management of FHT are dispelled in Table 3. For detailed information on treatment options, refer to the '2016 AAFP Guidelines for the Management of Feline Hyperthyroidism'.<sup>70</sup>

### Hipertiroidismo

El hipertiroidismo (HT) afecta al 10% de los gatos mayores de 10 años.<sup>69</sup> Es tratable, incluso curable, si se detecta a tiempo. El HT se diagnostica por una combinación de signos clínicos (p. ej., Pérdida de peso, polifagia, poliuria, polidipsia, aumento de la vocalización, agitación, aumento de la actividad, vómitos, diarrea, pelaje descuidado, apatía, inapetencia y letargo)<sup>70</sup> y la concentración elevada de la hormona tiroidea sérica elevada (T4). La identificación de tendencias en el nivel de T4 es valiosa para establecer un diagnóstico temprano de HT. Los mitos comunes relacionados con el tratamiento y el manejo de la HT se observan en la Tabla 3. Para obtener información detallada sobre las opciones de tratamiento, consulte la "2016 Guía para el manejo del hipertiroidismo felino".<sup>70</sup>

**Table 3** Myths vs facts pertaining to treatment and management of feline hyperthyroidism (FHT)

| MYTH                                                                                                                                         | FACT                                                                                                                                                                                                                                |
|----------------------------------------------------------------------------------------------------------------------------------------------|-------------------------------------------------------------------------------------------------------------------------------------------------------------------------------------------------------------------------------------|
| Treatment of FHT causes kidney disease                                                                                                       | Excess T4 increases glomerular filtration rate (GFR). Effective treatment of FHT decreases GFR, unmasking pre-existing CKD                                                                                                          |
| Cats with creatinine levels within reference intervals do not have CKD                                                                       | Increased GFR and muscle loss associated with FHT cause a decrease in creatinine even if a cat has CKD                                                                                                                              |
| Maintaining T4 slightly above reference intervals will help patients with CKD                                                                | Even mild elevations in T4 can cause or exacerbate glomerular damage                                                                                                                                                                |
| Post-treatment T4 below the reference interval does not harm cats. The patient is not hypothyroid so long as T4 is in the reference interval | Iatrogenic hypothyroidism can cause progression of CKD and shorten lifespan. Cats can develop clinically significant hypothyroidism even if T4 is within the reference interval                                                     |
| Isolation after radioactive iodine ( <sup>131</sup> I) treatment is too stressful on a cat                                                   | Although 1 week away from home involves some stress, it is far better than stress associated with the disease itself, plus constant medication and frequent blood testing                                                           |
| <sup>131</sup> I is cost-prohibitive                                                                                                         | The cost of all treatment options for 1 year is essentially the same. Over the life of the cat the cost of <sup>131</sup> I is significantly less than the cost of disease complications, lifelong medication or prescription diets |

Consulte la página 74 de este documento para ver Tabla 3

|                                                                                                                                                                                                                                                                                                                                                                                                                                                                                                                                                                                                                                                                                                                                                                                                                                                                                                           |                                                                                                                                                                                                                                                                                                                                                                                                                                                                                                                                                                                                                                                                                                                                                                                                                                                                                                                                                                                                                                                                           |
|-----------------------------------------------------------------------------------------------------------------------------------------------------------------------------------------------------------------------------------------------------------------------------------------------------------------------------------------------------------------------------------------------------------------------------------------------------------------------------------------------------------------------------------------------------------------------------------------------------------------------------------------------------------------------------------------------------------------------------------------------------------------------------------------------------------------------------------------------------------------------------------------------------------|---------------------------------------------------------------------------------------------------------------------------------------------------------------------------------------------------------------------------------------------------------------------------------------------------------------------------------------------------------------------------------------------------------------------------------------------------------------------------------------------------------------------------------------------------------------------------------------------------------------------------------------------------------------------------------------------------------------------------------------------------------------------------------------------------------------------------------------------------------------------------------------------------------------------------------------------------------------------------------------------------------------------------------------------------------------------------|
| <p><b>Diabetes mellitus</b></p> <p>DM is a common endocrinopathy in senior cats. Most cases are similar to type II diabetes in humans, especially in cats over the age of 10, in which pancreatic beta cell destruction and peripheral insulin resistance are the underlying pathology.<sup>71,72</sup> Corticosteroid usage may predispose sensitive individuals.</p>                                                                                                                                                                                                                                                                                                                                                                                                                                                                                                                                    | <p><b>Diabetes mellitus</b></p> <p>La DM es una endocrinopatía común en gatos mayores. La mayoría de los casos son similares a la diabetes tipo II en humanos, especialmente en gatos mayores de 10 años de edad, en el que la destrucción de las células beta pancreáticas y la resistencia periférica a la insulina son la patología subyacente.<sup>71,72</sup> El uso de corticosteroides puede predisponer a individuos sensible.</p>                                                                                                                                                                                                                                                                                                                                                                                                                                                                                                                                                                                                                                |
| <p>Nutritional management using low-carbohydrate, high-protein canned food can help these patients if they are receptive.<sup>73</sup> Most diabetic cats are insulin-dependent at the time of diagnosis. The more quickly the cat's blood glucose normalizes, the greater the likelihood of clinical remission.<sup>74</sup> Other factors found to be associated with an increased likelihood of remission are lower blood glucose at diagnosis, absence of hypercholesterolemia, lower mean 12-h blood glucose at day 17 of treatment and higher insulin-like growth factor at 1–3 weeks post-diagnosis.<sup>75</sup> Long-acting insulins may facilitate reaching this goal.<sup>74</sup> The presence of concurrent diseases, such as pancreatitis, affects clinical remission and glycemic control. Exocrine pancreatic insufficiency may occur as a comorbidity in diabetic cats.<sup>76</sup></p> | <p>El manejo nutricional con alimentos enlatados bajos en carbohidratos y ricos en proteínas puede ayudar a estos pacientes si son receptivos.<sup>73</sup> La mayoría de los gatos diabéticos son insulino dependientes en el momento del diagnóstico. Cuanto más rápidamente se normaliza la glucosa en sangre del gato, mayor es la probabilidad de remisión clínica.<sup>74</sup> Otros factores que se encuentran asociados con una mayor probabilidad de remisión son una glucemia más baja al momento del diagnóstico, ausencia de hipercolesterolemia, glucemia media más baja de 12h al día 17 del tratamiento y un factor de crecimiento similar a la insulina más alto a las 1-3 semanas después del diagnóstico.<sup>75</sup> Las insulinas de acción prolongada pueden facilitar el logro de este objetivo.<sup>74</sup> La presencia de enfermedades concurrentes, como la pancreatitis, afecta la remisión clínica y el control glucémico. La insuficiencia pancreática exocrina puede ocurrir como una comorbilidad en gatos diabéticos.<sup>76</sup></p> |

|                                                                                                                                                                                                                                                                                                                                                                                                                                                                                                                                                                                                                                                                                                                                                                           |                                                                                                                                                                                                                                                                                                                                                                                                                                                                                                                                                                                                                                                                                                                                                                                                                                                                                     |
|---------------------------------------------------------------------------------------------------------------------------------------------------------------------------------------------------------------------------------------------------------------------------------------------------------------------------------------------------------------------------------------------------------------------------------------------------------------------------------------------------------------------------------------------------------------------------------------------------------------------------------------------------------------------------------------------------------------------------------------------------------------------------|-------------------------------------------------------------------------------------------------------------------------------------------------------------------------------------------------------------------------------------------------------------------------------------------------------------------------------------------------------------------------------------------------------------------------------------------------------------------------------------------------------------------------------------------------------------------------------------------------------------------------------------------------------------------------------------------------------------------------------------------------------------------------------------------------------------------------------------------------------------------------------------|
| <p>Monitoring the diabetic cat with in-hospital glucose curves can be difficult in some patients.<sup>77–79</sup> Fructosamine evaluates serum glycemic control over longer time intervals and may differentiate between DM and stress hyperglycemia. Recently, continuous glucose monitors have become available and, potentially with feline a1c (glycohemoglobin) monitoring in the future, may facilitate home management.</p> <p>For more information, see the 'ISFM Consensus Guidelines on the Practical Management of Diabetes Mellitus in Cats'<sup>80</sup> and AAFP Diabetes Educational Toolkit.<sup>81</sup></p>                                                                                                                                             | <p>La monitorización del gato diabético con curvas de glucosa intrahospitalarias puede resultar difícil en algunos pacientes.<sup>77–79</sup> La fructosamina evalúa el control glucémico sérico durante intervalos de tiempo más prolongados y puede diferenciar entre DM e hiperglucemia de estrés. Recientemente, los monitores continuos de glucosa están disponibles y, potencialmente con la monitorización felina de a1c (glucohemoglobina) en el futuro, pueden facilitar el manejo en el hogar.</p> <p>Para obtener más información, consulte la "Guía de consenso de la ISFM sobre el manejo práctico de la diabetes mellitus en los gatos"<sup>80</sup> y el Kit de herramientas educativas sobre diabetes de la AAFP.<sup>81</sup></p>                                                                                                                                  |
| <p><b>Dental disease</b></p> <p>Dental disease is a common but underdiagnosed condition in the feline patient.<sup>51</sup> As many as 70% of cats will experience some form of dental disease by 2 years of age.<sup>51</sup> In patients over the age of 7 years, common forms of dental disease include periodontal disease, tooth resorption, oral tumors and systemic diseases with oral manifestations (eg, CKD, DM).<sup>47</sup> Age correlates significantly with the incidence of periodontal disease<sup>48</sup> and tooth resorption.<sup>49,50</sup></p>                                                                                                                                                                                                    | <p><b>Enfermedad dental</b></p> <p>La enfermedad dental es una condición común pero poco diagnosticada en el paciente felino.<sup>51</sup> Hasta el 70% de los gatos experimentará alguna forma de enfermedad dental a los 2 años de edad.<sup>51</sup> En pacientes mayores de 7 años, las formas comunes de enfermedad dental incluyen enfermedad periodontal, reabsorción dental, tumores orales y enfermedades sistémicas con manifestaciones orales (p. ej., ERC, DM).<sup>47</sup> La edad se correlaciona significativamente con la incidencia de enfermedad periodontal<sup>48</sup> y reabsorción dental.<sup>49,50</sup></p>                                                                                                                                                                                                                                              |
| <p>The Task Force considers the following to be priorities with respect to dental disease and the senior cat:</p> <ul style="list-style-type: none"><li>* Never consider advancing age alone as a barrier to providing optimal dental care.</li><li>* Dental radiography is an essential component of dental care in the cat,<sup>51,82</sup> including:<ul style="list-style-type: none"><li>– Full-mouth dental radiography preceding development of a treatment plan.</li><li>– Post-surgical dental radiographs to ensure proper surgical extraction and to document the extraction site (ie, ensure full root extraction, document degree of crown amputation, identify state of alveolar bone secondary to extraction techniques).<sup>51</sup></li></ul></li></ul> | <p>El grupo de trabajo considera que las siguientes son prioridades con respecto a las enfermedades dentales y el gato mayor:</p> <ul style="list-style-type: none"><li>* Nunca considere la vejez por sí sola como una barrera para brindar un cuidado dental óptimo.</li><li>* La radiografía dental es un componente esencial del cuidado dental en el gato,<sup>51,82</sup> que incluye:<ul style="list-style-type: none"><li>- Radiografía dental de boca completa previa al desarrollo de un plan de tratamiento.</li><li>- Radiografías dentales posquirúrgicas para asegurar una extracción quirúrgica adecuada y documentar el sitio de extracción (p. ej. asegurar la extracción completa de la raíz, documentar el grado de amputación de la corona, identificar el estado del hueso alveolar secundario a las técnicas de extracción).<sup>51</sup></li></ul></li></ul> |



|                                                                                                                                                                                                                                                                                                                                                                                                                                                                                                                                                                                                                                                                                                                                                                                                                                                             |                                                                                                                                                                                                                                                                                                                                                                                                                                                                                                                                                                                                                                                                                                                                                                                                                                                                                                                                                                                                                                                                                                          |
|-------------------------------------------------------------------------------------------------------------------------------------------------------------------------------------------------------------------------------------------------------------------------------------------------------------------------------------------------------------------------------------------------------------------------------------------------------------------------------------------------------------------------------------------------------------------------------------------------------------------------------------------------------------------------------------------------------------------------------------------------------------------------------------------------------------------------------------------------------------|----------------------------------------------------------------------------------------------------------------------------------------------------------------------------------------------------------------------------------------------------------------------------------------------------------------------------------------------------------------------------------------------------------------------------------------------------------------------------------------------------------------------------------------------------------------------------------------------------------------------------------------------------------------------------------------------------------------------------------------------------------------------------------------------------------------------------------------------------------------------------------------------------------------------------------------------------------------------------------------------------------------------------------------------------------------------------------------------------------|
| <p>* Utilize appropriate analgesia pre-, intra- and postoperatively.</p> <p>* Utilize pain scales to assess the success of analgesia (eg, Feline Grimace Scale<sup>83</sup>).</p>                                                                                                                                                                                                                                                                                                                                                                                                                                                                                                                                                                                                                                                                           | <p>* Utilice la analgesia adecuada antes, durante y después de la operación.</p> <p>* Utilizar escala de dolor para evaluar el éxito de la analgesia (p. ej., Feline Grimace Scale<sup>83</sup>).</p>                                                                                                                                                                                                                                                                                                                                                                                                                                                                                                                                                                                                                                                                                                                                                                                                                                                                                                    |
| <p><b>Gastrointestinal disease</b></p> <p>Changes occur in every body system with aging, with some of the more profound changes taking place in the GI tract. Changes in pharyngeal, esophageal and GI motility, and alterations in gastric pH lead to a shift in the GI microbiota, resulting in decreased digestibility and progressive weight loss.<sup>84</sup> Weight loss may be the only sign of digestive system disease in cats. Constipation is also a common GI issue affecting older cats.<sup>84,85</sup> Its etiology is likely multifactorial. Hypokalemia can contribute to slow GI motility<sup>85</sup> and constipation may be an indicator of hypercalcemia.<sup>86</sup> The pain of posturing to defecate and passing hard, dry stool potentiates the problem (Box 3). Fecal scoring charts can be utilized for stool assessment.</p> | <p><b>Enfermedad gastrointestinal</b></p> <p>Los cambios ocurren en todos los sistemas del cuerpo con el envejecimiento, y algunos de los cambios más profundos tienen lugar en el tracto gastrointestinal. Los cambios en la motilidad faríngea, esofágica y gastrointestinal y las alteraciones en el pH gástrico conducen a un cambio en la microbiota gastrointestinal, lo que resulta en una disminución de la digestibilidad y una pérdida de peso progresiva.<sup>84</sup> La pérdida de peso puede ser el único signo de una enfermedad del sistema digestivo en los gatos. El estreñimiento también es un problema gastrointestinal común que afecta a los gatos mayores.<sup>84,85</sup> Es probable que su etiología sea multifactorial. La hipopotasemia puede contribuir a disminuir la motilidad gastrointestinal<sup>85</sup> y el estreñimiento puede ser un indicador de hipercalcemia.<sup>86</sup> El dolor de la postura para defecar y evacuar heces duras y secas potencia el problema (Recuadro 3). Las tablas de puntuación fecal se pueden utilizar para evaluar las heces.</p> |

**Box 3**

**Posibles factores que contribuyen al estreñimiento felino**

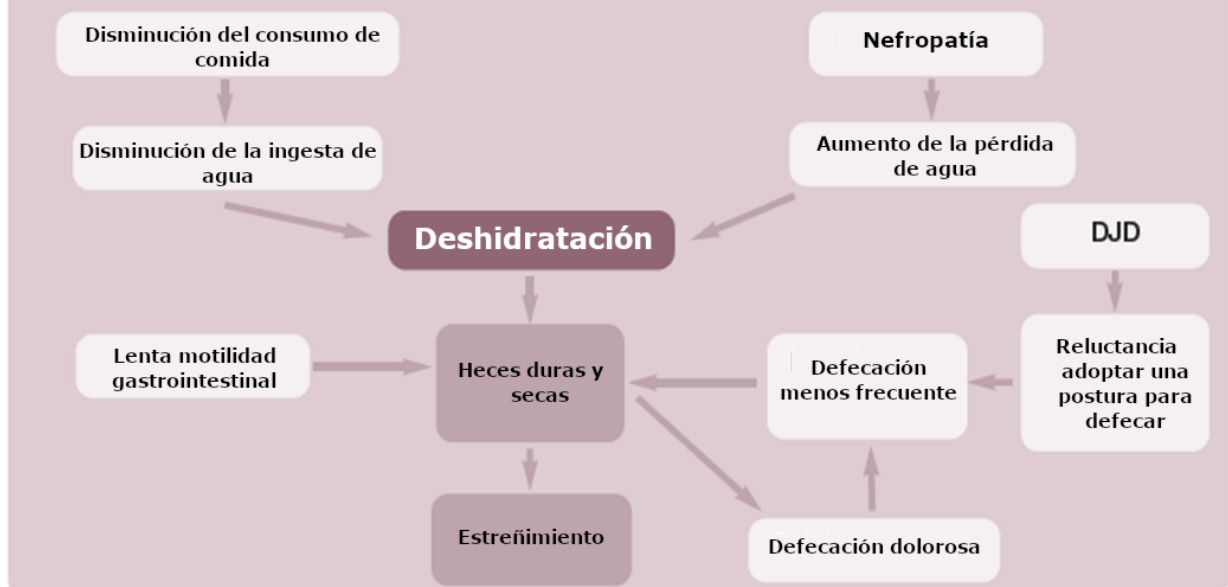

|                                                                                                                                                                                                                                                                                                                                                                                                                                                                                                                                                                                                                                                                                                                                                                                                                                               |                                                                                                                                                                                                                                                                                                                                                                                                                                                                                                                                                                                                                                                                                                                                                                                                                                                                                                                                                  |
|-----------------------------------------------------------------------------------------------------------------------------------------------------------------------------------------------------------------------------------------------------------------------------------------------------------------------------------------------------------------------------------------------------------------------------------------------------------------------------------------------------------------------------------------------------------------------------------------------------------------------------------------------------------------------------------------------------------------------------------------------------------------------------------------------------------------------------------------------|--------------------------------------------------------------------------------------------------------------------------------------------------------------------------------------------------------------------------------------------------------------------------------------------------------------------------------------------------------------------------------------------------------------------------------------------------------------------------------------------------------------------------------------------------------------------------------------------------------------------------------------------------------------------------------------------------------------------------------------------------------------------------------------------------------------------------------------------------------------------------------------------------------------------------------------------------|
| <p>Inflammatory bowel disease (IBD), neoplasia, pancreatitis ± triaditis, pancreatic insufficiency and parasitism are common considerations for weight loss in the absence of other clinical signs. To obtain a definitive diagnosis, investigation beyond baseline laboratory work is required. Additional diagnostics include abdominal ultrasonography and serum measurement of feline pancreatic lipase immunoreactivity (fPLI), trypsin-like immunoreactivity (TLI), cobalamin and folate. A diagnosis of pancreatitis cannot be made by ultrasonography or blood tests alone; but, when performed together, they can increase the likelihood of a correct diagnosis.<sup>87</sup> Similarly, a negative fecal examination for parasites must not be overinterpreted – it only means that none were present in the submitted sample.</p> | <p>La enfermedad inflamatoria intestinal (EII), neoplasia, pancreatitis ± triaditis, insuficiencia pancreática y parasitismo son consideraciones comunes para la pérdida de peso en ausencia de otros signos clínicos. Para obtener un diagnóstico definitivo, se requiere una investigación más allá del trabajo de laboratorio de referencia. Los diagnósticos adicionales incluyen ecografía abdominal y medición sérica de inmunoreactividad de lipasa pancreática felina (fPLI), inmunoreactividad similar a tripsina (TLI), cobalamina y folato. El diagnóstico de pancreatitis no se puede realizar únicamente mediante ecografía o análisis de sangre; pero, cuando se realizan juntos, pueden aumentar la probabilidad de un diagnóstico correcto.<sup>87</sup> De manera similar, un examen fecal negativo en busca de parásitos no debe ser sobreinterpretar, solo significa que no había ninguno presente en la muestra enviada.</p> |
| <p><b>Cancer</b></p> <p>As cats age, the risk of cancers increases.<sup>88</sup> Signs are often non-specific such as loss of appetite, weight loss or lethargy. Use of cat friendly techniques with gentle and smooth palpation can aid in the quality of information the veterinarian gathers. Be alert for cachexia and paraneoplastic hair loss.</p>                                                                                                                                                                                                                                                                                                                                                                                                                                                                                      | <p><b>Cáncer</b></p> <p>A medida que los gatos envejecen, aumenta el riesgo de cáncer.<sup>88</sup> Los signos a menudo son inespecíficos, como pérdida de apetito, pérdida de peso o letargo. El uso de técnicas amigables con los gatos con una palpación suave y suave puede ayudar a la calidad de la información que recopila por el veterinario. Esté alerta a la caquexia y la caída del cabello paraneoplásica.</p>                                                                                                                                                                                                                                                                                                                                                                                                                                                                                                                      |
| <p>Up to 50 percent of feline cutaneous masses are histologically malignant<sup>89</sup> (commonly mast cell tumors, squamous cell carcinomas, melanomas, fibrosarcomas) and diagnostics should be performed when detected, as delaying diagnosis may lead to a poorer prognosis on account of growth and/or metastasis. Encouraging owners to check all cats monthly for skin masses, documenting location and size, can allow earlier detection.</p> <p>Many cancers can be treated or ameliorated, especially if detected early. Working with an oncologist will provide up-to-date therapeutic options.</p>                                                                                                                                                                                                                               | <p>Hasta el 50 por ciento de las masas cutáneas felinas son histológicamente malignas<sup>89</sup> (comúnmente tumores de mastocitos, carcinomas de células escamosas, melanomas, fibrosarcomas) y se deben realizar diagnósticos cuando se detectan, ya que retrasar el diagnóstico puede conducir a un peor pronóstico debido al crecimiento y / o metástasis. Alentar a los dueños a revisar todos los gatos mensualmente para detectar masas de piel, documentando la ubicación y el tamaño, puede permitir una detección más temprana.</p> <p>Muchos cánceres pueden tratarse o mejorarse, especialmente si se detectan a tiempo. Trabajar con un oncólogo proporcionará opciones terapéuticas actualizadas.</p>                                                                                                                                                                                                                            |

|                                                                                                                                                                                                                                                                                                                                                                                                                                                                                                                                                                                                                                                                                                                                                                                                                                                                    |                                                                                                                                                                                                                                                                                                                                                                                                                                                                                                                                                                                                                                                                                                                                                                                                                                                                                                                                                                                                                                                      |
|--------------------------------------------------------------------------------------------------------------------------------------------------------------------------------------------------------------------------------------------------------------------------------------------------------------------------------------------------------------------------------------------------------------------------------------------------------------------------------------------------------------------------------------------------------------------------------------------------------------------------------------------------------------------------------------------------------------------------------------------------------------------------------------------------------------------------------------------------------------------|------------------------------------------------------------------------------------------------------------------------------------------------------------------------------------------------------------------------------------------------------------------------------------------------------------------------------------------------------------------------------------------------------------------------------------------------------------------------------------------------------------------------------------------------------------------------------------------------------------------------------------------------------------------------------------------------------------------------------------------------------------------------------------------------------------------------------------------------------------------------------------------------------------------------------------------------------------------------------------------------------------------------------------------------------|
| <p>Discussing goals of therapy with owners will help guide recommendations. There has been great progress with chemotherapeutics, radiation and photodynamic therapies, as well as surgical techniques, leading to significant time in remission and increased owner satisfaction. Many cancers can be treated palliatively using less aggressive interventions, slowing growth, and managing pain and nausea to maintain wellbeing. Client education includes discussion about quality of life and available treatments. Route or modality of treatment may be modified in some cases to best suit the patient and/or owner. Providing information on ranges of response to therapy, evaluating the cat's acceptance of treatment regimens, and estimating costs will help owners make the most appropriate treatment decisions for their cat and themselves.</p> | <p>Discutir los objetivos de la terapia con los dueños ayudará a orientar sobre las recomendaciones. Ha habido un gran progreso con la quimioterapia, la radiación y las terapias fotodinámicas, así como con las técnicas quirúrgicas, lo que ha llevado a un tiempo significativo en remisión y una mayor satisfacción del propietario. Muchos cánceres se pueden tratar de forma paliativa mediante intervenciones menos agresivas, desacelerando el crecimiento y controlando el dolor y las náuseas para mantener el bienestar. La educación del cliente incluye una discusión sobre la calidad de vida y los tratamientos disponibles. La ruta o modalidad de tratamiento puede modificarse en algunos casos para adaptarse mejor al paciente y / o propietario. Proporcionar información sobre los rangos de respuesta a la terapia, evaluar la aceptación del gato de los regímenes de tratamiento y estimar los costos ayudará a los propietarios a tomar las decisiones de tratamiento más adecuadas para su gato y para ellos mismos.</p> |
| <p><b>Ongoing sources of pain</b></p> <p>Many of the conditions discussed in these Guidelines involve a component of pain. Pain must be investigated and managed as a disease in itself and treated concomitantly with the primary presenting problem(s). Assessing chronic pain in cats is challenging, but our ability to do so is rapidly improving.<sup>90</sup> There are multiple causes of ongoing pain in senior cats (see Box 4), and the pain experience may escalate when more than one condition is present due to amplification of the pain-sensing system. DJD, soft tissue, inflammatory and neurologic pain are important to discuss as they are a frequent cause of ongoing discomfort in senior cats.</p>                                                                                                                                        | <p><b>Fuentes de dolor continuas</b></p> <p>Muchas de las condiciones discutidas en esta guía implican un componente de dolor. El dolor debe investigarse y tratarse como una enfermedad en sí misma y tratarse concomitantemente con el problema o los problemas de presentación primarios. Evaluar el dolor crónico en los gatos es un desafío, pero nuestra capacidad para hacerlo está mejorando rápidamente.<sup>90</sup> Hay múltiples causas de dolor continuo en los gatos mayores (ver Recuadro 4), y la experiencia del dolor puede aumentar cuando más de una condición está presente debido a amplificación del dolor del sistema sensorial. Es importante discutir el dolor de DJD, de tejidos blandos, inflamatorio y neurológico, ya que son una causa frecuente de malestar continuo en los gatos mayores.</p>                                                                                                                                                                                                                       |

Box 4

Common conditions associated with long-term pain

- ❖ DJD
- ❖ Dental disease
- ❖ Neurologic – lumbosacral disease, disc disease, cervical pain
- ❖ Myofascial and soft tissue pain
- ❖ Dermatologic – dermatitis, otitis, recalcitrant wounds
- ❖ Ocular – corneal ulcers, uveitis, glaucoma
- ❖ Visceral – IBD, pancreatitis, megacolon, constipation, idiopathic cystitis
- ❖ Cancer – primary tumor or treatment related (eg, radiation burns)
- ❖ Persistent postoperative pain – onychectomy, mastectomy, limb amputation

Box 4

**Common conditions associated with long-term pain**

- \* DJD
- \* Dental disease
- \* Neurologic – lumbosacral disease, disc disease, cervical pain
- \* Myofascial and soft tissue pain
- \* Dermatologic – dermatitis, otitis, recalcitrant wounds
- \* Ocular – corneal ulcers, uveitis, glaucoma
- \* Visceral – IBD, pancreatitis, megacolon, constipation, idiopathic cystitis
- \* Cancer – primary tumor or treatment related, radiation burns)
- \* Persistent postoperative pain – onychectomy, mastectomy, limb amputation

DJD is a chronic degenerative disease affecting the appendicular and axial skeleton.<sup>91</sup> Its prevalence is strongly related to age, affecting up to 74% of cats  $\geq 12$  years of age.<sup>91,92</sup> The disease is multifaceted; peripheral and central changes result in maladaptive pain. Maladaptive pain serves no purpose (ie, is not protective) and can be further divided into neuropathic pain (direct damage to neurologic tissue) and functional pain (malfunction of the nociceptive system).<sup>93</sup>

Recuadro 4

**Condiciones comunes asociadas con el dolor a largo plazo**

- \* DJD
- \* Enfermedad dental
- \* Neurológico: enfermedad lumbosacra, enfermedad del disco, dolor cervical
- \* Dolor miofascial y de tejidos blandos
- \* Dermatológico: dermatitis, otitis, heridas recalcitrantes
- \* Ocular: úlceras corneales, uveítis, glaucoma
- \* Visceral – EII, pancreatitis, megacolon, estreñimiento, cistitis idiopática
- \* Cáncer – tumor primario o relacionado con el tratamiento (p. ej., Quemaduras por radiación)
- \* Dolor postoperatorio persistente – oniquetomía, mastectomía, amputación de extremidades

El DJD es una enfermedad degenerativa crónica que afecta al esqueleto apendicular y axial.<sup>91</sup> Su prevalencia está fuertemente relacionada con la edad, afectando hasta al 74% de los gatos  $\geq 12$  años.<sup>91,92</sup> La enfermedad es multifacética; los cambios periféricos y centrales dan como resultado un dolor desadaptativo. El dolor desadaptativo no tiene ningún propósito (p. ej., no es protector) y puede dividirse en dolor neuropático (daño directo al tejido neurológico) y dolor funcional (mal funcionamiento del sistema nociceptivo).<sup>93</sup>

Many cats with DJD are undiagnosed and go untreated. Diagnosis depends on client-based questionnaires,<sup>94–96</sup> history, an orthopedic, neurologic and myofascial examination, radiographs, and, in some cases, response to a treatment trial. Clinically expedient screening tools will increase the likelihood of identifying affected cats; one such tool comprises six questions (Box 5).<sup>97</sup> The answer to 'how is your cat jumping up and down compared with last year?' can alert a clinician to whether or not they need to pursue a DJD work-up. A comprehensive resource for veterinarians and cat owners is the Feline Musculoskeletal Pain Index (FMPI; [painfreecats.org](http://painfreecats.org)).

Muchos gatos con DJD no se diagnostican ni se tratan. El diagnóstico depende de cuestionarios basados en el cliente,<sup>94–96</sup> antecedentes, un examen ortopédico, neurológico y miofascial, radiografías y, en algunos casos, la respuesta a un tratamiento de ensayo. Las herramientas de detección clínicamente convenientes aumentarán la probabilidad de identificar a los gatos afectados; una de estas herramientas consta de seis preguntas (Recuadro 5).<sup>97</sup> La respuesta a "¿cómo está saltando su gato hacia arriba y hacia abajo en comparación con el año pasado?" puede alertar a un médico sobre si necesita o no realizar un estudio de DJD. Un recurso completo para veterinarios y dueños de gatos es el Índice de dolor musculoesquelético felino (FMPI; [painfreecats.org](http://painfreecats.org)).

### Box 5

#### Owner checklist for detecting DJD-associated pain in cats

To determine if your cat is showing signs of DJD-associated pain, please complete the following questionnaire. Please answer all questions.

- ❖ Does your cat jump up normally?  Yes  No
- ❖ Does your cat jump down normally?  Yes  No
- ❖ Does your cat climb up stairs or steps normally?  Yes  No
- ❖ Does your cat climb down stairs or steps normally?  Yes  No
- ❖ Does your cat run normally?  Yes  No
- ❖ Does your cat chase moving objects (eg, toys)?  Yes  No

From Enomoto et al<sup>97</sup>

### Box 5

#### Owner checklist for detecting DJD-associated pain in cats

To determine if your cat is showing signs of DJD-associated pain, please complete the following questionnaire. Please answer all questions.

- \* Does your cat jump up normally?
  - \* Does your cat jump down normally?
  - \* Does your cat climb up stairs or steps normally?
  - \* Does your cat climb down stairs or steps normally?
  - \* Does your cat run normally?
  - \* Does your cat chase moving objects (eg, toys)?
- Yes  
 No

From Enomoto et al<sup>97</sup>

Based on the Musculoskeletal Pain Screening Checklist (MiPSC) © 2019 North Carolina State University

### Recuadro 5

#### Lista de verificación del propietario para detectar DJD asociado con dolor en los gatos

Para determinar si su gato muestra signos de dolor asociado con DJD, complete el siguiente cuestionario. Responda todas las preguntas.

- \* ¿Tu gato salta hacia arriba normalmente?
  - \* ¿Tu gato salta hacia abajo normalmente?
  - \* ¿Su gato sube escaleras o escalones normalmente?
  - \* ¿Su gato baja escaleras o escalones normalmente?
  - \* ¿Tu gato corre normalmente?
  - \* ¿Su gato persigue objetos en movimiento (p. ej., juguetes)?
- Si  
 No

De Enomoto et al<sup>97</sup>

Basado en el Musculoskeletal Pain Screening Checklist (MiPSC) © 2019 North Carolina State University

|                                                                                                                                                                                                                                                                                                                                                                                                                                                                                                                                                                                                                                                                                                                                                                                                                                                                                                                                                                                                                                                                                                                   |                                                                                                                                                                                                                                                                                                                                                                                                                                                                                                                                                                                                                                                                                                                                                                                                                                                                                                                                                                                                                                                                                                                                                                                                                                                                                                          |
|-------------------------------------------------------------------------------------------------------------------------------------------------------------------------------------------------------------------------------------------------------------------------------------------------------------------------------------------------------------------------------------------------------------------------------------------------------------------------------------------------------------------------------------------------------------------------------------------------------------------------------------------------------------------------------------------------------------------------------------------------------------------------------------------------------------------------------------------------------------------------------------------------------------------------------------------------------------------------------------------------------------------------------------------------------------------------------------------------------------------|----------------------------------------------------------------------------------------------------------------------------------------------------------------------------------------------------------------------------------------------------------------------------------------------------------------------------------------------------------------------------------------------------------------------------------------------------------------------------------------------------------------------------------------------------------------------------------------------------------------------------------------------------------------------------------------------------------------------------------------------------------------------------------------------------------------------------------------------------------------------------------------------------------------------------------------------------------------------------------------------------------------------------------------------------------------------------------------------------------------------------------------------------------------------------------------------------------------------------------------------------------------------------------------------------------|
| <p>DJD is currently incurable and requires lifelong treatment to maintain comfort, mobility and quality of life. With this comes challenges related to owner aversion and poor compliance, adverse effects of long-term medication, drug interactions and the impact of comorbidities. The complex etiology of DJD-related pain demands a multimodal and integrative approach involving pharmacologic and non-pharmacologic therapies, and environmental modification.</p>                                                                                                                                                                                                                                                                                                                                                                                                                                                                                                                                                                                                                                        | <p>EL DJD es actualmente incurable y requiere un tratamiento de por vida para mantener la comodidad, la movilidad y la calidad de vida. Con esto vienen los desafíos relacionados con la aversión del propietario y el cumplimiento deficiente, los efectos adversos de la medicación a largo plazo, las interacciones farmacológicas y el impacto de las comorbilidades. La compleja etiología del dolor relacionado con el DJD exige un enfoque multimodal e integrador que incluya terapias farmacológicas y no farmacológicas y modificación ambiental.</p>                                                                                                                                                                                                                                                                                                                                                                                                                                                                                                                                                                                                                                                                                                                                          |
| <p>Veterinarians prescribe a wide variety of drugs and supplements for cats with DJD, despite a limited evidence base for many.<sup>93</sup> Drugs with published efficacy include non-steroidal anti-inflammatory drugs (NSAIDs),<sup>98</sup> gabapentin<sup>99</sup> and tramadol;<sup>100,101</sup> however, most studies were designed to look at monotherapy. Approximately 68% of cats with DJD have some degree of CKD,<sup>102</sup> making the use of NSAIDs in this population controversial. Retrospective studies showed no adverse effect on renal function (sequential serum creatinine concentration and USG) or longevity in cats with stable CKD (IRIS stages 1–3) receiving meloxicam at a median daily dose 0.02 mg/kg.<sup>103,104</sup> No adverse effects were reported in cats with CKD (IRIS stages 1–2) given robenacoxib 1.0–2.4 mg/kg q24h for 28 days in a prospective study.<sup>105</sup> However, a recent prospective study (meloxicam 0.02 mg/kg q24h for 6 months or placebo) in cats with CKD reported a higher UPCR at 6 months in meloxicam-treated cats.<sup>106</sup></p> | <p>Los veterinarios prescriben una amplia variedad de medicamentos y suplementos para gatos con DJD, a pesar de una base de evidencia limitada para muchos.<sup>93</sup> Los medicamentos con eficacia publicada incluyen medicamentos antiinflamatorios no esteroideos (AINE),<sup>98</sup> gabapentina<sup>99</sup> y tramadol;<sup>100,101</sup> sin embargo, la mayoría de los estudios fueron diseñados para considerar la monoterapia. Aproximadamente el 68% de los gatos con DJD tienen algún grado de ERC,<sup>102</sup> lo que hace que el uso de AINE en esta población sea controvertido. Los estudios retrospectivos no mostraron ningún efecto adverso en la función renal (concentración secuencial de creatinina sérica y SG) o la longevidad en gatos con ERC estable (estadios 1-3 del IRIS) que recibieron meloxicam a una dosis diaria media de 0,02 mg / kg.<sup>103,104</sup> No se informaron efectos adversos en gatos con ERC (estadios 1-2 del IRIS) que recibieron robenacoxib 1.0-2.4 mg / kg cada 24h durante 28 días en un estudio prospectivo.<sup>105</sup> Sin embargo, un estudio prospectivo reciente (meloxicam 0.02 mg / kg cada 24h durante 6 meses o placebo) en gatos con reportó un mayor UPCR a los 6 meses en gatos tratados con meloxicam.<sup>106</sup></p> |
| <p>Emerging treatments (eg, feline-specific monoclonal anti-nerve growth factor antibodies) address the neuropathic component of the disease and overcome the problems of daily treatment because they are administered subcutaneously once every 4–6 weeks.<sup>107</sup></p>                                                                                                                                                                                                                                                                                                                                                                                                                                                                                                                                                                                                                                                                                                                                                                                                                                    | <p>Los tratamientos emergentes (p. ej., anticuerpos monoclonales de anti-factor de crecimiento nervioso felinos específicos) abordan el componente neuropático de la enfermedad y superan los problemas del tratamiento diario porque se administran por vía subcutánea una vez cada 4-6 semanas.<sup>107</sup></p>                                                                                                                                                                                                                                                                                                                                                                                                                                                                                                                                                                                                                                                                                                                                                                                                                                                                                                                                                                                      |

|                                                                                                                                                                                                                                                                                                                                                                                                                                                                                                                                                                                                |                                                                                                                                                                                                                                                                                                                                                                                                                                                                                                                                                                                                                                                                                                                    |
|------------------------------------------------------------------------------------------------------------------------------------------------------------------------------------------------------------------------------------------------------------------------------------------------------------------------------------------------------------------------------------------------------------------------------------------------------------------------------------------------------------------------------------------------------------------------------------------------|--------------------------------------------------------------------------------------------------------------------------------------------------------------------------------------------------------------------------------------------------------------------------------------------------------------------------------------------------------------------------------------------------------------------------------------------------------------------------------------------------------------------------------------------------------------------------------------------------------------------------------------------------------------------------------------------------------------------|
| <p>Soft tissue pain occurs with restriction of tissue mobility related to multiple disease states (eg, DJD, oral and visceral pain states, and direct injury to soft tissue structures). Myofascial palpation assesses tissue viscosity and mobility, and will elicit a response from the cat (eg, vocalization, turning, escape attempt) if pain is present. Soft tissues become restricted when movement is reduced, or inflammation is present. Exercise, massage, acupuncture, shock wave therapy and vibration are the definitive treatments for painful soft tissue restriction.</p>     | <p>El dolor de tejidos blandos se produce con la restricción de la movilidad de los tejidos relacionada con múltiples estados patológicos (p. ej., DJD, estados de dolor oral y visceral y lesión directa de las estructuras de los tejidos blandos). La palpación miofascial evalúa la viscosidad y la movilidad del tejido y provocará una respuesta del gato (p. ej., vocalización, giro, intento de escape) si hay dolor presente. Los tejidos blandos se restringen cuando se reduce el movimiento o hay inflamación presente. El ejercicio, el masaje, la acupuntura, la terapia de ondas de choque y la vibración son los tratamientos definitivos para la restricción dolorosa de los tejidos blandos.</p> |
| <p>Neurologic pain is common in aging cats, especially at the lumbosacral and pelvic regions of the spinal cord. This type of pain is often maladaptive and difficult to treat. Neurologic conditions may remain localized or may be accompanied by pain and dysfunction of somatically related visceral structures (eg, colonic dysfunction and megacolon with lumbosacral disease).<sup>108,109</sup></p> <p>Inflammatory pain is a feature of many feline diseases. Aging cats appear to experience amplified changes in their immune system that may predispose them to comorbidities.</p> | <p>El dolor neurológico es común en gatos de edad avanzada, especialmente en las regiones lumbosacra y pélvica de la médula espinal. Este tipo de dolor suele ser desadaptativo y difícil de tratar. Las afecciones neurológicas pueden permanecer localizadas o pueden ir acompañadas de dolor y disfunción de estructuras viscerales relacionadas somáticamente (p. ej., disfunción colónica y megacolon con enfermedad lumbosacra).<sup>108,109</sup></p> <p>El dolor inflamatorio es una característica de muchas enfermedades felinas. Los gatos que envejecen parecen experimentar cambios amplificadas en su sistema inmunológico que pueden predisponer a comorbilidades.</p>                              |

|                                                                                                                                                                                                                                                                                                                                                                                                                                                                                                                                                                                                                                                                                                                                                                            |                                                                                                                                                                                                                                                                                                                                                                                                                                                                                                                                                                                                                                                                                                                                                                                                                                                                                                        |
|----------------------------------------------------------------------------------------------------------------------------------------------------------------------------------------------------------------------------------------------------------------------------------------------------------------------------------------------------------------------------------------------------------------------------------------------------------------------------------------------------------------------------------------------------------------------------------------------------------------------------------------------------------------------------------------------------------------------------------------------------------------------------|--------------------------------------------------------------------------------------------------------------------------------------------------------------------------------------------------------------------------------------------------------------------------------------------------------------------------------------------------------------------------------------------------------------------------------------------------------------------------------------------------------------------------------------------------------------------------------------------------------------------------------------------------------------------------------------------------------------------------------------------------------------------------------------------------------------------------------------------------------------------------------------------------------|
| <p><b>Cognitive dysfunction syndrome</b></p> <p>Aging cats often exhibit excessive vocalization, altered social interactions or activity patterns, and house-soiling.<sup>110–112</sup> In over 25% of cats 11 years or older, these changes have no recognized medical causation.<sup>111,113</sup> Because feline motivations can be occult, inter- and intra-cat differences abound; also changes appear gradually and mimic adaptive responses to chronic pain.<sup>114</sup> Owners and veterinarians may, therefore, blame cognitive dysfunction syndrome (CDS) on ‘just being an old cat’. If veterinarians strongly urge owners to record and serially review pictures and videos of their cat’s daily routines, changes for each cat become apparent earlier.</p> | <p><b>Síndrome de disfunción cognitiva</b></p> <p>Los gatos que envejecen a menudo exhiben una vocalización excesiva, interacciones sociales o patrones de actividad alterados y suciedad en la casa.<sup>110–112</sup> En más del 25% de los gatos de 11 años o más, estos cambios no tienen una causa médica reconocida.<sup>111,113</sup> Debido a que las motivaciones felinas pueden ser ocultas, abundan las diferencias entre gatos y dentro de ellos; también aparecen cambios gradualmente e imitan respuestas adaptativas al dolor crónico.<sup>114</sup> Los dueños y veterinarios pueden, por lo tanto, culpar al síndrome de disfunción cognitiva (SDC) a "ser un gato viejo". Si los veterinarios urgen encarecidamente a los dueños a que registren y revisen en serie fotografías y videos de las rutinas diarias de su gato, los cambios para cada gato se harán evidentes antes.</p> |
| <p>The acronym DISHA-AL (Box 6) has been used to describe clinical signs of cognitive decline. Provocative questions (Box 7) to identify components of DISHA-AL and the subsequent clinical work-up can distinguish medical from cognitive decline. CDS ultimately is a diagnosis of exclusion of medical and environmental causes for the behaviors.<sup>9,112</sup></p>                                                                                                                                                                                                                                                                                                                                                                                                  | <p>El acrónimo DISHA-AL (Recuadro 6) se ha utilizado para describir los signos clínicos de deterioro cognitivo. Las preguntas provocativas (Recuadro 7) para identificar los componentes de DISHA-AL y el análisis clínico posterior pueden distinguir médicamente el deterioro cognitivo. El SDC es, en última instancia, un diagnóstico de exclusión de las causas médicas y ambientales de los comportamientos.<sup>9,112</sup></p>                                                                                                                                                                                                                                                                                                                                                                                                                                                                 |
| 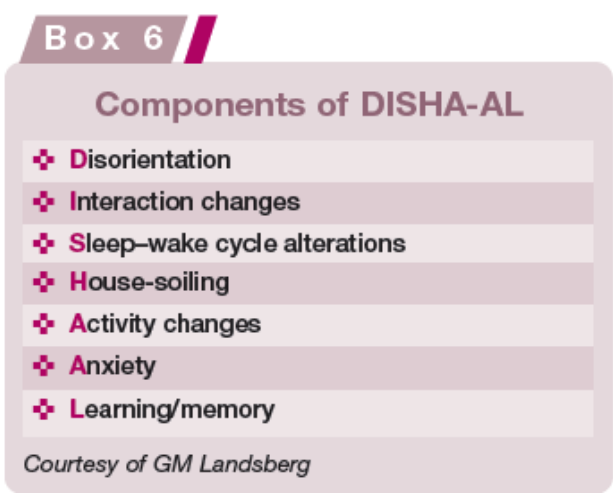 <p><b>Box 6</b></p> <p><b>Components of DISHA-AL</b></p> <ul style="list-style-type: none"> <li>❖ Disorientation</li> <li>❖ Interaction changes</li> <li>❖ Sleep-wake cycle alterations</li> <li>❖ House-soiling</li> <li>❖ Activity changes</li> <li>❖ Anxiety</li> <li>❖ Learning/memory</li> </ul> <p><i>Courtesy of GM Landsberg</i></p>                                                                                                                                                                                                                                                                                                                                           | <p>Recuadro 6</p> <p><b>Componentes de DISHA-AL</b></p> <ul style="list-style-type: none"> <li>* Desorientación</li> <li>* Cambios de interacción</li> <li>* Alteraciones del ciclo sueño y vigilia</li> <li>* Suciedad de la casa</li> <li>* Cambios de actividad</li> <li>* Ansiedad</li> <li>* Aprendizaje / memoria</li> </ul> <p><i>Cortesía de GM Landsberg</i></p>                                                                                                                                                                                                                                                                                                                                                                                                                                                                                                                              |



**Box 7**

**Ten provocative questions for investigation of possible CDS**

- ❖ What's the highest surface to which your cat will jump? Does your cat seem lame?
- ❖ When was the last time you saw your cat stretch and yawn luxuriously?
- ❖ Has your cat urinated or defecated outside of the litter box since the last examination?
- ❖ How have your cat's interactions with its housemates changed?
- ❖ Is your cat more aloof or clingier/more affectionate with you than previously?
- ❖ Does your cat 'talk' (vocalize), meow insistently or yowl for no apparent reason?
- ❖ How have your cat's grooming and sleeping habits changed?
- ❖ How have your cat's eating and drinking habits changed?
- ❖ How willing is your cat to play with toys or hunt if given the opportunity?
- ❖ How often does your cat act confused, forgetful or depressed?

**Recuadro 7**

**Diez preguntas provocadoras para la investigación de posibles CDS**

- \* ¿Cuál es la superficie más alta a la que saltará tu gato? ¿Tu gato parece estar cojo?
- \* ¿Cuándo fue la última vez que vio a su gato estirarse y bostezar lujosamente?
- \* ¿Tu gato ha orinado o defecado fuera de la caja de arena desde el último examen?
- \* ¿Cómo han cambiado las interacciones de su gato con sus compañeros de casa?
- \* ¿Tu gato es más distante o apegado/más cariñoso contigo que antes?
- \* ¿Tu gato "habla" (vocaliza), maúlla insistentemente o aúlla sin razón aparente?
- \* ¿Cómo han cambiado los hábitos de aseo y sueño de su gato?
- \* ¿Cómo han cambiado los hábitos de comer y beber de su gato?
- \* ¿Qué tan dispuesto está su gato a jugar con juguetes o cazar si se le da la oportunidad?
- \* ¿Con qué frecuencia su gato actúa confundido, olvidadizo o deprimido?

If management that integrates client education, environmental optimization<sup>8,9,115</sup> (see later in Table 5), supplements with essential fatty acids, antioxidants and B vitamins,<sup>116–118</sup> and pheromones<sup>119</sup> fails to bring improvement, selegiline (0.25–1 mg/kg q24h) may be beneficial.<sup>120,121</sup> Individualized combination therapy is most effective and can improve brain function, longevity and owner peace of mind.<sup>9</sup>

Si el manejo que integra la educación del cliente, la optimización ambiental<sup>8,9,115</sup> (ver más adelante en la Tabla 5), los suplementos con ácidos grasos esenciales, antioxidantes y vitaminas B1,<sup>116–118</sup> y feromonas,<sup>119</sup> no logra mejorar, la selegilina (0.25-1 mg / kg cada 24 h) puede ser beneficioso.<sup>120,121</sup> La terapia combinada individualizada es más efectiva y puede mejorar la función cerebral, la longevidad y la tranquilidad del propietario.<sup>9</sup>

| <b>Complex disease management</b>                                                                                                                                                                                                                                                                                                                                                                                                                                                                                                                                                                                                                                                                              | <b>Manejo de enfermedades complejas</b>                                                                                                                                                                                                                                                                                                                                                                                                                                                                                                                                                                                                                                                                                                                                                                                                                                 |
|----------------------------------------------------------------------------------------------------------------------------------------------------------------------------------------------------------------------------------------------------------------------------------------------------------------------------------------------------------------------------------------------------------------------------------------------------------------------------------------------------------------------------------------------------------------------------------------------------------------------------------------------------------------------------------------------------------------|-------------------------------------------------------------------------------------------------------------------------------------------------------------------------------------------------------------------------------------------------------------------------------------------------------------------------------------------------------------------------------------------------------------------------------------------------------------------------------------------------------------------------------------------------------------------------------------------------------------------------------------------------------------------------------------------------------------------------------------------------------------------------------------------------------------------------------------------------------------------------|
| <p>Comorbidities are common in gerontology, and cats are much like humans in this tendency.<sup>122</sup> Reasons for the high frequency of comorbidities as cats age remain speculative, but this likely relates to a combination of exogenous stress causing oxidative injuries, infectious agent exposure over time, and imbalance of the immune system.<sup>123,124</sup> As homeostasis of the immune system falters, immunosenescence (reduced sensitivity to external pathogens) and hypervigilance of autologous tissues can occur together and are sometimes referred to as ‘inflamm-aging’ changes.<sup>125</sup></p>                                                                                | <p>Las comorbilidades son comunes en gerontología, y los gatos se parecen mucho a los humanos en esta tendencia.<sup>122</sup> Las razones por la alta frecuencia de comorbilidades a medida que los gatos envejecen siguen siendo especulativas, pero esto probablemente se relaciona con una combinación de estrés exógeno que causa lesiones oxidativas, exposición a agentes infecciosos a lo largo del tiempo, y desequilibrio del sistema inmunológico.<sup>123,124</sup> A medida que falla la homeostasis del sistema inmunológico, la inmunosenescencia (sensibilidad reducida a los patógenos externos) y la hipervigilancia de los tejidos autólogos pueden ocurrir juntas y, a veces, se denominan cambios de ‘envejecimiento inflamatorio’.<sup>125</sup></p>                                                                                              |
| <p>While specific inflamm-aging discussion is largely restricted to the human gerontology literature, the Task Force feels the concept of frailty helps capture a component of the complex conditions that can coalesce in the cat. The concept of a ‘frailty prevention model’ delineates three levels of intervention: 1) primary – ie, minimize risk factors and disease onset; 2) secondary – delay progression of disease; and 3) tertiary – reduce or limit impairments, disabilities and complications that result from disease. By the time cats enter their senior years, the first two levels are behind them. The focus now is on the third category of reduction and limitation of impairment.</p> | <p>Si bien la discusión específica sobre el envejecimiento inflamatorio se limita en gran medida a la literatura sobre gerontología humana, el grupo de trabajo siente que el concepto de fragilidad ayuda a capturar un componente de las complejas condiciones que pueden coalescer en el gato. El concepto de "modelo de prevención de la fragilidad" delinea tres niveles de intervención: 1) primaria – p. ej., minimizar los factores de riesgo y la aparición de la enfermedad; 2) secundario – retrasar la progresión de la enfermedad; y 3) terciario – reducir o limitar las deficiencias, discapacidades y complicaciones que resultan de la enfermedad. Para cuando los gatos entran en sus años mayores, los dos primeros niveles han quedado atrás. La atención se centra ahora en la tercera categoría de reducción y limitación de la discapacidad.</p> |

The goal of healthy aging has been with us since a time when cats seldom reached old age. Now that substantial progress has been achieved in increasing longevity, focusing on the quality of that longevity is important. Although healthy aging means different things to different people regarding both themselves and their cats, and one's perspective of healthy aging often changes with time and circumstances, comfort and enjoyment of life are likely to be common targets. It is also important to recognize that that an owner's expectations for a cat will reflect the owner's own attitude toward healthy self-aging.

El objetivo del envejecimiento saludable ha estado con nosotros desde una época en la que los gatos rara vez llegaban a la vejez. Ahora que se ha logrado un progreso sustancial en el aumento de la longevidad, es importante centrarse en la calidad de esa longevidad. Aunque un envejecimiento saludable significa cosas diferentes para diferentes personas con respecto a ellos mismos y a sus gatos, y la perspectiva de un envejecimiento saludable a menudo cambia con el tiempo y las circunstancias, la comodidad y el disfrute de la vida más probable son objetivos comunes. También es importante reconocer que las expectativas de un dueño para un gato reflejarán la propia actitud del dueño hacia el auto-envejecimiento saludable.

As cats get older, the risk of developing more than one disease increases, often complicating diagnosis and treatment. Diagnosis is aided by a combination of a thorough physical examination, screening diagnostic testing, and attention to the common comorbidities listed in Box 8.

A medida que los gatos envejecen, aumenta el riesgo de desarrollar más de una enfermedad, lo que a menudo complica el diagnóstico y el tratamiento. El diagnóstico se complementa con una combinación de un examen físico completo, pruebas de diagnóstico de detección y atención a las comorbilidades comunes enumeradas en el Recuadro 8.

**Box 8**

**Commonly recognized feline disease combinations**

- ❖ CKD + hyperthyroidism
- ❖ CKD + DJD<sup>102</sup>
- ❖ CKD + heart failure<sup>126</sup>
- ❖ CKD + periodontal disease<sup>127,128</sup>
- ❖ Hyperthyroidism + DM<sup>129</sup>
- ❖ DM + obesity<sup>130\*</sup>
- ❖ DM + CKD<sup>131</sup>
- ❖ DM + hyperadrenocorticism<sup>132\*</sup>
- ❖ DM + lower urinary tract disorders<sup>133</sup>
- ❖ DM + UTIs + hyperthyroidism + CKD<sup>65</sup>
- ❖ Obesity + DJD/DM/cardiac disease/respiratory illness<sup>36,134</sup>
- ❖ Triaditis<sup>135,136\*</sup>
- ❖ Hypertension + hyperthyroidism
- ❖ Hypertension + CKD
- ❖ Hypertension + hyperaldosteronism
- ❖ CKD + thin body condition/periodontal disease/cystitis<sup>137</sup>
- ❖ Underweight + DJD/DM/CKD/hyperthyroidism/neoplasia<sup>138,139</sup>

Based on Scherk<sup>125</sup>  
\*These reviews appear within a *JFMS* virtual special issue on feline comorbidities, which discusses the complexities of diagnosis and management, available at [cpsi.jfms.com](http://cpsi.jfms.com)

**Recuadro 8**

**Combinaciones de enfermedades felinas comúnmente reconocidas**

- \* ERC + hipertiroidismo
- \* ERC + DJD<sup>102</sup>
- \* ERC + insuficiencia cardíaca<sup>126</sup>
- \* ERC + enfermedad periodontal<sup>127,128</sup>
- \* Hipertiroidismo + DM<sup>129</sup>
- \* DM + obesidad<sup>130†</sup>
- \* DM + ERC<sup>131</sup>
- \* DM + hiperadrenocorticismo<sup>132†</sup>
- \* DM + trastornos del tracto urinario inferior<sup>133</sup>
- \* DM + ITU + hipertiroidismo + ERC<sup>65</sup>
- \* Obesidad + DJD / DM / enfermedad cardíaca / enfermedad respiratoria<sup>36,134</sup>
- \* Triaditis<sup>135,136†</sup>
- \* Hipertensión + hipertiroidismo
- \* Hipertensión + ERC
- \* Hipertensión + hiperaldosteronismo

|                                                                                                                                                                                                                                                                                                                                                                                                                                                                                                                                                                                                                                                                                                                                                                                                                                                                                                                                                                                                                                                                                                                                                                                                                                                                                                                                                                                                                                                                                                                                                                                                                                                                                                                                                                     |                                                                                                                                                                                                                                                                                                                                                                                                                                                                                                                                                                                                                                                                                                                                                                                                                                                                                                                                                                                                                                                                                                                                                                                                                                                                                                                                                                                                                                                                                                                                                                                                                                                                                                                                                                                                                                                                  |
|---------------------------------------------------------------------------------------------------------------------------------------------------------------------------------------------------------------------------------------------------------------------------------------------------------------------------------------------------------------------------------------------------------------------------------------------------------------------------------------------------------------------------------------------------------------------------------------------------------------------------------------------------------------------------------------------------------------------------------------------------------------------------------------------------------------------------------------------------------------------------------------------------------------------------------------------------------------------------------------------------------------------------------------------------------------------------------------------------------------------------------------------------------------------------------------------------------------------------------------------------------------------------------------------------------------------------------------------------------------------------------------------------------------------------------------------------------------------------------------------------------------------------------------------------------------------------------------------------------------------------------------------------------------------------------------------------------------------------------------------------------------------|------------------------------------------------------------------------------------------------------------------------------------------------------------------------------------------------------------------------------------------------------------------------------------------------------------------------------------------------------------------------------------------------------------------------------------------------------------------------------------------------------------------------------------------------------------------------------------------------------------------------------------------------------------------------------------------------------------------------------------------------------------------------------------------------------------------------------------------------------------------------------------------------------------------------------------------------------------------------------------------------------------------------------------------------------------------------------------------------------------------------------------------------------------------------------------------------------------------------------------------------------------------------------------------------------------------------------------------------------------------------------------------------------------------------------------------------------------------------------------------------------------------------------------------------------------------------------------------------------------------------------------------------------------------------------------------------------------------------------------------------------------------------------------------------------------------------------------------------------------------|
|                                                                                                                                                                                                                                                                                                                                                                                                                                                                                                                                                                                                                                                                                                                                                                                                                                                                                                                                                                                                                                                                                                                                                                                                                                                                                                                                                                                                                                                                                                                                                                                                                                                                                                                                                                     | <p>* ERC + condición corporal delgada / enfermedad periodontal / cistitis<sup>137</sup></p> <p>* Bajo peso +<br/>DJD / DM / ERC / hipertiroidismo / neoplasia<sup>138,139</sup></p> <p>Basado en Scherk<sup>123</sup></p> <p>† Estas revisiones aparecen dentro de la edición especial virtual de JFMS sobre comorbilidades felinas, que analiza las complejidades del diagnóstico y el manejo, disponible en <a href="http://cpsi.jfms.com">cpsi.jfms.com</a></p>                                                                                                                                                                                                                                                                                                                                                                                                                                                                                                                                                                                                                                                                                                                                                                                                                                                                                                                                                                                                                                                                                                                                                                                                                                                                                                                                                                                               |
| <p>As the number of concurrent disease conditions increases, a related decrease in health-related quality of life (HRQOL) occurs.<sup>140</sup> Some of the issues that arise in senior cats with multiple diseases include:</p> <ul style="list-style-type: none"> <li>* The effect of polypharmacy and risk of drug interactions. Reduced renal or hepatic clearance can require reduced dosing or increased intervals of medications.<sup>141</sup></li> <li>* Owner aversion and poor compliance to the medical plan, particularly where there is a high medication burden, risking negatively impacting the cat–owner bond.</li> <li>* The effect of diet on body condition, inflammatory homeostasis, GI function, kidney function and overall health.</li> <li>* The cumulative impact of multiple diseases. For example, CKD, DJD, DM, IBD, CDS and behavioral issues, when present in any combination, can compound inappropriate elimination.</li> <li>* Hypertension. This may occur with various disease states (thyroid, cardiac, renal) and is much more common than previously recognized.</li> <li>* A risk of diagnosing one disease while missing another, or assuming a single disease is severe when signs are actually due to multiple diseases. For example:             <ul style="list-style-type: none"> <li>– When cholangitis, pancreatitis and/or IBD occur together, one or more may be missed.<sup>142</sup></li> <li>– Chronic pancreatitis may be missed in a diabetic patient.<sup>76,143</sup></li> <li>– Hyperthyroidism may be missed in cats with kidney or liver disease, or cancer because typical signs are masked and T4 may be suppressed back into the top of the normal range.<sup>144,145</sup></li> </ul> </li> </ul> | <p>A medida que aumenta el número de enfermedades concurrentes, se produce una disminución relacionada en la calidad de vida relacionada con la salud (CVRS).<sup>140</sup> Algunos de los problemas que surgen en los gatos mayores con múltiples enfermedades incluyen:</p> <ul style="list-style-type: none"> <li>* El efecto de la polifarmacia y el riesgo de interacciones de medicamentos. La reducción del aclaramiento renal o hepático puede requerir una reducción de la dosis o un aumento de los intervalos de medicación.<sup>141</sup></li> <li>* Aversión del dueño de mascota y escaso cumplimiento del plan médico, particularmente donde hay una alta carga de medicamentos, con el riesgo de afectar negativamente el vínculo entre el gato y el dueño.</li> <li>* El efecto de la dieta en la condición corporal, la homeostasis inflamatoria, la función gastrointestinal, la función renal y la salud en general.</li> <li>* El impacto acumulativo de múltiples enfermedades. Por ejemplo, ERC, DJDM, EII, SDC y problemas de comportamiento, cuando están presentes en cualquier combinación, pueden agravar la eliminación inapropiada.</li> <li>* Hipertensión. Esto puede ocurrir con varios estados patológicos (tiroides, cardíacos, renales) y es mucho más común de lo que se reconocía anteriormente.</li> <li>* El riesgo de diagnosticar una enfermedad sin tener en cuenta otra, o suponer que una sola enfermedad es grave cuando los signos se deben en realidad a múltiples enfermedades. Por ejemplo:             <ul style="list-style-type: none"> <li>– Cuando la colangitis, la pancreatitis y / o la EII se presentan juntas, es posible que se pasen por alto una o más.<sup>142</sup></li> <li>– La pancreatitis crónica puede pasarse por alto en un paciente diabético.<sup>76,143</sup></li> </ul> </li> </ul> |

- Hyperthyroidism may be missed in cats with DM due to similarity in signs.
- The diagnosis of bacteriuria in cats with kidney disease, hyperthyroidism or diabetes can be complicated because signs of lower urinary tract disease, pyuria and/or active urine sediment are not always present. Diagnosis can only be confirmed by performing a urinalysis and bacterial culture.<sup>65</sup>
- Hyperthyroidism and cardiac disease may occur together, with only one being recognized.
- Most diseases have a component of pain, complicating the assessment of other sources of pain, such as DJD, soft tissue or neurologic, when using standardized pain scales. Myofascial examination is a partial solution to this diagnostic dilemma.
- The impact of comorbid conditions on quality of life fluctuates (eg, during chemotherapy, nausea may be worse than pain).
- \* Pain severity will change throughout the cat's remaining lifetime depending on the disease and its progression, response to treatment, inflammatory status and lifestyle modifications. Complex disease management may feel overwhelming for a general practitioner; however, they are often best suited to oversee the cat's care as they see the 'whole picture,' have a rapport with the owner, and can consult or refer the cat to specialists when needed. The presence of multiple diseases can likewise be overwhelming for clients, and an important component of the care veterinarians provide includes supporting the owner (see Box 9).

- El hipertiroidismo puede pasar desapercibido en gatos con enfermedad renal o hepática, o cáncer porque los signos típicos están enmascarados y la T4 puede volver a suprimirse hasta el límite superior del rango normal.<sup>144,145</sup>
- El hipertiroidismo puede pasarse por alto en gatos con DM debido a la similitud de los signos.
- El diagnóstico de bacteriuria en gatos con enfermedad renal, hipertiroidismo o diabetes puede complicarse porque no siempre se presentan signos de enfermedad del tracto urinario inferior, piuria y / o sedimento urinario activo. El diagnóstico sólo puede confirmarse mediante un análisis de orina y un cultivo bacteriano.<sup>65</sup>
- El hipertiroidismo y la enfermedad cardíaca pueden ocurrir juntos, y solo se reconoce uno.
- La mayoría de las enfermedades tienen un componente de dolor, lo que complica la evaluación de otras fuentes de dolor, como DJD, tejido blando o neurológico, cuando se utilizan escalas de dolor estandarizadas. El examen miofascial es una solución parcial a este dilema diagnóstico.
- El impacto de las enfermedades comórbidas sobre la calidad de vida varía (p. ej., Durante la quimioterapia, las náuseas pueden ser peores que el dolor).
- \* La gravedad del dolor cambiará a lo largo de la vida restante del gato según la enfermedad y su progresión, la respuesta al tratamiento, el estado inflamatorio y las modificaciones del estilo de vida. El manejo complejo de enfermedades puede resultar abrumador para un médico general; sin embargo, a menudo son los más adecuados para supervisar el cuidado del gato, ya que ven el "panorama completo", tienen una buena relación con el dueño y pueden consultar o derivar al gato a especialistas cuando sea necesario. La presencia de múltiples enfermedades también puede ser abrumadora para los clientes, y un componente importante de la atención que brindan los veterinarios incluye el apoyo al propietario (ver Recuadro 9).

Box 9

Tips for supporting owners of cats with multiple diseases

❖ Focus first on the disease that has the biggest impact on quality of life. Rankings are dynamic and the disease that poses the greatest threat to quality of life may shift over time.

❖ Be mindful of pill burden, cost and compliance. Educate clients about administering and scheduling medications, asking about their abilities and limitations.

❖ Multiple treatments can be difficult for the patient and the client; it is important that the quality of the human-animal bond is maintained. Coach clients on ways to administer medications in a calm manner that is comfortable for the cat.

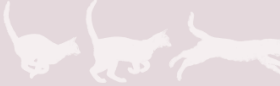

❖ Explore using pastes, favorite food treats or treats specifically designed to hide pills or, alternatively, reformulating oral medications into treats, liquids or pastes. Never place medications in a prescription diet as the cat may reject that food.

❖ Research whether dosing can be once rather than two or more times a day by changing the dose or the product formulation. Some owners find subcutaneous injections easier to give than oral medications.

❖ Very few feline drugs are effective when applied transdermally. Many compounding pharmacies offer a multitude of drugs for this purpose but there is little to no evidence to demonstrate efficacy. Two drugs used commonly in senior cats, mirtazapine and methimazole, are measurable and reliable when administered transdermally.<sup>146,147</sup>

Recuadro 9

**Consejos para ayudar a los dueños de gatos con múltiples enfermedades**

- \* Concéntrese primero en la enfermedad que tiene el mayor impacto en la calidad de vida. Las clasificaciones son dinámicas y la enfermedad que representa la mayor amenaza para la calidad de vida puede cambiar con el tiempo.
- \* Tenga en cuenta la carga de la píldora, el costo y el cumplimiento. Eduque a los clientes sobre la administración y programación de medicamentos, preguntándoles sobre sus habilidades y limitaciones.
- \* Múltiples tratamientos pueden resultar difíciles para el paciente y el cliente; es importante que se mantenga la calidad del vínculo humano-animal. Instruya a los clientes sobre las formas de administrar los medicamentos de una manera tranquila que sea cómoda para el gato.
- \* Explore el uso de pastas, golosinas de comida favorita o golosinas diseñadas específicamente para ocultar píldoras o, alternatively, reformular los medicamentos orales en golosinas, líquidos o pastas. Nunca coloques medicamentos en una dieta recetada ya que el gato puede rechazar esa comida.
- \* Investigue si la dosificación puede ser una vez en lugar de dos o más veces al día cambiando la dosis o la formulación del producto. Algunos propietarios encuentran que las inyecciones subcutáneas son más fáciles de administrar que los medicamentos orales.
- \* Muy pocos medicamentos felinos son efectivos cuando se aplican por vía transdérmica. Muchas farmacias de compuestos ofrecen una multitud de medicamentos para este propósito, pero hay poca o ninguna evidencia que demuestre su eficacia. Dos medicamentos que se usan comúnmente en gatos mayores, mirtazapina y metimazol, son medibles y confiables cuando se administran por vía transdérmica.<sup>146,147</sup>

|                                                                                                                                                                                                                                                                                                                                                                                                                                                                                                                                                                                                                                                                                                                                                           |                                                                                                                                                                                                                                                                                                                                                                                                                                                                                                                                                                                                                                                                                                                                                                                                                       |
|-----------------------------------------------------------------------------------------------------------------------------------------------------------------------------------------------------------------------------------------------------------------------------------------------------------------------------------------------------------------------------------------------------------------------------------------------------------------------------------------------------------------------------------------------------------------------------------------------------------------------------------------------------------------------------------------------------------------------------------------------------------|-----------------------------------------------------------------------------------------------------------------------------------------------------------------------------------------------------------------------------------------------------------------------------------------------------------------------------------------------------------------------------------------------------------------------------------------------------------------------------------------------------------------------------------------------------------------------------------------------------------------------------------------------------------------------------------------------------------------------------------------------------------------------------------------------------------------------|
| <p>Ancillary therapies include environmental enrichment and modification as well as physical medicine treatments such as physical therapy, acupuncture, massage and electrophysical modalities. Many positive forms of activity can be instituted at home, and regular attendance at physical medicine sessions at a facility can be rewarding for both the cat and their owner. Involving owners as part of the treatment team, and making them feel they are part of the solution, promotes buy-in; it also increases the time the cat and owner spend together. Assigning owners duties that support positive interactions such as grooming or playing will decrease the risk that the cat will only associate the owner with receiving treatment.</p> | <p>Las terapias auxiliares incluyen el enriquecimiento y la modificación ambiental, así como tratamientos de medicina física como fisioterapia, acupuntura, masajes y modalidades electrofísicas. Muchas formas positivas de actividad en el hogar pueden ser instituidas, y la asistencia regular a las sesiones de medicina física en una instalación puede ser gratificante tanto para el gato como para su dueño. Involucrar a los propietarios como parte del equipo de tratamiento y hacerles sentir que son parte de la solución promueve la aceptación; también aumenta el tiempo que el gato y el dueño pasan juntos. Asignar tareas a los propietarios que apoyen las interacciones positivas, como acicalarse o jugar, reducirá el riesgo de que el gato solo asocie al dueño con recibir tratamiento.</p> |
| <p>Controlled exercise – when performed with appropriate restrictions, continuity and regularity – produces analgesia, similar to a pain medication.<sup>148</sup> Regular physical activity conveys multiple benefits – influencing gastric and colonic motility, balancing immune status, reducing seizure breakthrough, and improving appetite and cognition.<sup>149</sup></p> <p>As many of the coalescing conditions in senior cats are likely related to imbalances in neuroimmune homeostasis, it is important to prioritize an approach that emphasizes quality of life and use of non-pharmacologic treatments, alongside pharmacologic treatments and appropriate monitoring.</p>                                                              | <p>Ejercicio controlado – cuando se realiza con las restricciones, continuidad y regularidad – produce analgesia, similar a un analgésico.<sup>148</sup> La actividad física regular transmite múltiples beneficios: influye en la motilidad gástrica y colónica, equilibra el estado inmunológico, reduce el avance de las convulsiones y mejora el apetito y la cognición.<sup>149</sup></p> <p>Como muchas de las condiciones de coalescencia en gatos mayores probablemente estén relacionados con desequilibrios en la homeostasis neuroinmune, es importante priorizar un enfoque que enfatice calidad de vida y uso de tratamientos no farmacológicos, junto con tratamientos farmacológicos y seguimiento adecuado.</p>                                                                                       |

| Quality of life                                                                                                                                                                                                                                                                                                                                                                                                                                                                                                                                                                                                                                                                                                                                                                                                                                                                                                                                                                                                                             | Calidad de vida                                                                                                                                                                                                                                                                                                                                                                                                                                                                                                                                                                                                                                                                                                                                                                                                                                                                                                                                                                                                                                                                                                                                                                         |
|---------------------------------------------------------------------------------------------------------------------------------------------------------------------------------------------------------------------------------------------------------------------------------------------------------------------------------------------------------------------------------------------------------------------------------------------------------------------------------------------------------------------------------------------------------------------------------------------------------------------------------------------------------------------------------------------------------------------------------------------------------------------------------------------------------------------------------------------------------------------------------------------------------------------------------------------------------------------------------------------------------------------------------------------|-----------------------------------------------------------------------------------------------------------------------------------------------------------------------------------------------------------------------------------------------------------------------------------------------------------------------------------------------------------------------------------------------------------------------------------------------------------------------------------------------------------------------------------------------------------------------------------------------------------------------------------------------------------------------------------------------------------------------------------------------------------------------------------------------------------------------------------------------------------------------------------------------------------------------------------------------------------------------------------------------------------------------------------------------------------------------------------------------------------------------------------------------------------------------------------------|
| <p>‘How will I know it’s time?’ is one of the most frequently asked questions by owners. Assisting owners in making the decision to euthanize their cat is an essential part of our job. Comorbid diseases and their treatments, as well as physical challenges related to aging, impact quality of life. More therapeutic interventions and radical surgical procedures are now available to prolong life, but we must put the patient’s best interests first despite pressure from owners.<sup>150</sup> Just because we can, does not mean we should, and quality rather than quantity of life is a priority. Cats live in the moment and, unlike people, cannot know that ‘tomorrow may be better’ while going through unpleasant treatments. Our patients do not make choices for themselves; this falls on the owner and we must partner with them to make good, well-informed patient-centric decisions.</p>                                                                                                                         | <p>"¿Cómo se sabe que es el momento?" Es una de las preguntas más frecuentes de los dueños. Ayudar a los dueños a tomar la decisión de sacrificar a su gato es una parte esencial de nuestro trabajo. Las enfermedades comórbidas y sus tratamientos, así como los desafíos físicos relacionados con el envejecimiento, impactan la calidad de vida. Ahora se dispone de más intervenciones terapéuticas y procedimientos quirúrgicos radicales para prolongar la vida, pero debemos anteponer el interés superior del paciente a pesar de la presión de los propietarios.<sup>150</sup> El hecho de que podamos, no significa que debamos hacerlo, y la calidad de vida más que la cantidad es una prioridad. Los gatos viven en el momento y, a diferencia de las personas, no pueden saber que "mañana puede ser mejor" mientras se someten a tratamientos desagradables. Nuestros pacientes no toman decisiones por sí mismos; esto recae en el dueño y debemos asociarnos con él para tomar decisiones acertadas y bien informadas centradas en el paciente.</p>                                                                                                                   |
| <p>Animals, newborns, infants and cognitively impaired people cannot self-report and, therefore, patient-reported outcome instruments cannot be used.<sup>151,152</sup> Despite wide usage, the term quality of life (QOL) with respect to animals does not have a universally consistent or accepted definition, which has hampered our ability to measure it. Most people have a general understanding of what is meant by the term QOL, but it is surprisingly difficult to verbalize.<sup>153</sup> One working definition is ‘an individual’s satisfaction with its physical and psychological health, its physical and social environment and its ability to interact with that environment’.<sup>152</sup> ‘Health’ is the state of being free from illness or injury and ‘satisfaction’ is the fulfilment of one’s individual needs or state of positive mood.<sup>152</sup> When the veterinary team shares an understanding of what QOL means, owners are supported with consistent guidance for assessing QOL in their cats.</p> | <p>Los animales, los recién nacidos, los lactantes y las personas con deficiencias cognitivas no pueden autoinformarse y, por lo tanto, los instrumentos de resultado de informar los pacientes no se pueden utilizar.<sup>151,152</sup> A pesar del amplio uso, el término calidad de vida (CV) con respecto a los animales no tiene una coherencia universal o definición aceptada, lo que ha obstaculizado nuestra capacidad para medirlo. La mayoría de la gente tiene una comprensión general de lo que se entiende por el término calidad de vida, pero es sorprendentemente difícil de verbalizar.<sup>153</sup> Una definición de trabajo es 'la satisfacción de un individuo con su salud física y psicológica, su entorno físico y social y su capacidad para interactuar con ese entorno'.<sup>152</sup> "La Salud" es el estado de estar libre de enfermedad o lesión y 'satisfacción' es el cumplimiento de las necesidades individuales o el estado de ánimo positivo.<sup>152</sup> Cuando el equipo veterinario comparte una comprensión de lo que significa la calidad de vida, los propietarios son apoyados con una guía coherente para evaluar CV en sus gatos.</p> |



|                                                                                                                                                                                                                                                                                                                                                                                                                                                                                                                                                                                                                                                                                                            |                                                                                                                                                                                                                                                                                                                                                                                                                                                                                                                                                                                                                                                                                                                                                                                             |
|------------------------------------------------------------------------------------------------------------------------------------------------------------------------------------------------------------------------------------------------------------------------------------------------------------------------------------------------------------------------------------------------------------------------------------------------------------------------------------------------------------------------------------------------------------------------------------------------------------------------------------------------------------------------------------------------------------|---------------------------------------------------------------------------------------------------------------------------------------------------------------------------------------------------------------------------------------------------------------------------------------------------------------------------------------------------------------------------------------------------------------------------------------------------------------------------------------------------------------------------------------------------------------------------------------------------------------------------------------------------------------------------------------------------------------------------------------------------------------------------------------------|
| <p>QOL and HRQOL are different. QOL is a broad term and considers all aspects of a pet’s life, which includes physical and mental health. HRQOL refers to the specific impact of a medical condition on an individual’s health. An HRQOL instrument is able both to detect disease (be discriminative) and measure health changes over time (be evaluative).<sup>154</sup></p>                                                                                                                                                                                                                                                                                                                             | <p>La CV y la CVRS son diferentes. CV es un término amplio y considera todos los aspectos de la vida de una mascota, que incluye la salud física y mental. La CVRS se refiere al impacto específico de una condición médica en la salud de un individuo. Un instrumento de CVRS es capaz tanto de detectar enfermedades (ser discriminativo) como de medir los cambios de salud a lo largo del tiempo (ser evaluativo).<sup>154</sup></p>                                                                                                                                                                                                                                                                                                                                                   |
| <p>How do we take something internal, private and uniquely individual and make it accessible, objective and measurable? As observers, we cannot validly report on a cat’s pain intensity, but we can report behavioral changes thought to be a result of pain. Therefore, QOL can only be assessed in cats using proxy reports or direct observations; the proxy may be the owner, a veterinary professional or a combination of the two. These are referred to as observer-related outcomes.</p> <p>Pain is an affective state (emotion) and is always unpleasant but is not the only unpleasant feeling associated with chronic disease. Other things to consider are shown in Figure 8 and Table 4.</p> | <p>¿Cómo tomamos algo interno, privado y únicamente individual y lo hacemos accesible, objetivo y medible? Como observadores, no podemos informar válidamente sobre la intensidad del dolor de un gato, pero podemos informar cambios de comportamiento que se cree son el resultado del dolor. Por lo tanto, CV solo se puede evaluar en gatos mediante informes indirectos u observaciones directas; el apoderado puede ser el propietario, un veterinario o una combinación de ambos. Estos se conocen como resultados relacionados con el observador.</p> <p>El dolor es un estado afectivo (emoción) y siempre es desagradable, pero no es el único sentimiento desagradable asociado con la enfermedad crónica. Otras cosas a considerar se muestran en la Figura 8 y la Tabla 4.</p> |
|  <p>Figure 8. Quality of life considerations. <i>Courtesy of Sheilah Robertson</i></p>                                                                                                                                                                                                                                                                                                                                                                                                                                                                                                                                  | <p>Figura 8. Consideraciones sobre la calidad de vida. <i>Cortesía de Sheilah Robertson</i></p> <p>Dolor<br/> Deterioro de la movilidad<br/> Enfermedad<br/> Deterioro cognitivo<br/> Enfermedad crónica<br/> Ansiedad / miedo<br/> Frustración</p>                                                                                                                                                                                                                                                                                                                                                                                                                                                                                                                                         |

| Table 4 Examples of mental/emotional and physical states that contribute to a poor QOL                                                                                                                                                                                                                                                                                                                                                                                                                                                                                                |                                                                                                                                                                                                                                                                                                                                                                                                                                                                                                                                                                                                                                                                                                  | Consulte la página 75 de este documento para ver Tabla 4 |
|---------------------------------------------------------------------------------------------------------------------------------------------------------------------------------------------------------------------------------------------------------------------------------------------------------------------------------------------------------------------------------------------------------------------------------------------------------------------------------------------------------------------------------------------------------------------------------------|--------------------------------------------------------------------------------------------------------------------------------------------------------------------------------------------------------------------------------------------------------------------------------------------------------------------------------------------------------------------------------------------------------------------------------------------------------------------------------------------------------------------------------------------------------------------------------------------------------------------------------------------------------------------------------------------------|----------------------------------------------------------|
|                                                                                                                                                                                                                                                                                                                                                                                                                                                                                                                                                                                       | <b>Example</b>                                                                                                                                                                                                                                                                                                                                                                                                                                                                                                                                                                                                                                                                                   |                                                          |
| Mental/emotional                                                                                                                                                                                                                                                                                                                                                                                                                                                                                                                                                                      | Anxiety                                                                                                                                                                                                                                                                                                                                                                                                                                                                                                                                                                                                                                                                                          |                                                          |
|                                                                                                                                                                                                                                                                                                                                                                                                                                                                                                                                                                                       | Fear                                                                                                                                                                                                                                                                                                                                                                                                                                                                                                                                                                                                                                                                                             |                                                          |
|                                                                                                                                                                                                                                                                                                                                                                                                                                                                                                                                                                                       | Isolation and loneliness                                                                                                                                                                                                                                                                                                                                                                                                                                                                                                                                                                                                                                                                         |                                                          |
|                                                                                                                                                                                                                                                                                                                                                                                                                                                                                                                                                                                       | Boredom                                                                                                                                                                                                                                                                                                                                                                                                                                                                                                                                                                                                                                                                                          |                                                          |
|                                                                                                                                                                                                                                                                                                                                                                                                                                                                                                                                                                                       | Frustration                                                                                                                                                                                                                                                                                                                                                                                                                                                                                                                                                                                                                                                                                      |                                                          |
|                                                                                                                                                                                                                                                                                                                                                                                                                                                                                                                                                                                       | Distress                                                                                                                                                                                                                                                                                                                                                                                                                                                                                                                                                                                                                                                                                         |                                                          |
| Physical                                                                                                                                                                                                                                                                                                                                                                                                                                                                                                                                                                              | Chronic (maladaptive) pain (eg, DJD, dental disease, non-healing wounds)                                                                                                                                                                                                                                                                                                                                                                                                                                                                                                                                                                                                                         |                                                          |
|                                                                                                                                                                                                                                                                                                                                                                                                                                                                                                                                                                                       | Nausea and vomiting (eg, secondary to CKD)                                                                                                                                                                                                                                                                                                                                                                                                                                                                                                                                                                                                                                                       |                                                          |
|                                                                                                                                                                                                                                                                                                                                                                                                                                                                                                                                                                                       | Breathlessness (eg, respiratory disease, congestive heart failure)                                                                                                                                                                                                                                                                                                                                                                                                                                                                                                                                                                                                                               |                                                          |
|                                                                                                                                                                                                                                                                                                                                                                                                                                                                                                                                                                                       | Thirst (eg, uncontrolled DM, CKD)                                                                                                                                                                                                                                                                                                                                                                                                                                                                                                                                                                                                                                                                |                                                          |
| There is some urgency to develop evidence-based assessment tools to inform clinical decision-making. Using expert consensus, feline welfare issues in the UK, both on an individual and population level, have been prioritized. <sup>155</sup> The priority (ranking) of issues was determined by judging their severity and duration. Pertinent to these '2021 AAFP Feline Senior Care Guidelines' is that out of the top 10 welfare issues identified, diseases of old age were ranked second in priority, and delayed euthanasia was listed second for prevalence. <sup>155</sup> | Existe cierta urgencia por desarrollar herramientas de evaluación basadas en evidencia para informar la toma de decisiones. Utilizando el consenso de expertos, se han priorizado los problemas de bienestar felino en el Reino Unido, tanto a nivel individual como de población. <sup>155</sup> La prioridad (clasificación) de los problemas se determinó juzgando su gravedad y duración. Pertinente a las 'Guía del cuidado del gato mayor de la AAFP 2021' es que, de los 10 principales problemas de bienestar identificados, las enfermedades de la vejez se clasificaron en segundo lugar en prioridad y la eutanasia diferida se ubicó en segundo lugar en prevalencia. <sup>155</sup> |                                                          |
| In veterinary medicine, owner questionnaires and clinician-completed observation scales are frequently used to objectify the subjective. <sup>156</sup> Outcome assessment instruments must have specific attributes:<br><ul style="list-style-type: none"> <li>* Validity: proven to measure what is intended. This requires an accepted definition of what is being measured.</li> <li>* Reliability: close agreement between different observers</li> <li>* Responsiveness and sensitivity: ability to detect clinical changes over time or after treatment</li> </ul>             | En medicina veterinaria, los cuestionarios del propietario y las escalas de observación completadas por el médico se utilizan con frecuencia para objetar lo subjetivo. <sup>156</sup> Los instrumentos de evaluación de resultados deben tener atributos específicos:<br><ul style="list-style-type: none"> <li>* Validez: probada a medida de lo que se pretende. Esto requiere una definición aceptada de lo que se está midiendo.</li> <li>* Fiabilidad: acuerdo cercano entre diferentes observadores</li> <li>* Capacidad de respuesta y sensibilidad: capacidad para detectar cambios clínicos a lo largo del tiempo o después del tratamiento.</li> </ul>                                |                                                          |

Developing robust instruments to assess subjective states requires specific psychometric methodologies, which are time-consuming but worthwhile.<sup>153,157,158</sup> Which questions we should ask in relation to feline quality of life ultimately depends on knowing what matters to each cat. Detailed information on QOL and HRQOL instruments is provided in the supplementary material (see page 631).

Desarrollar instrumentos robustos para evaluar estados subjetivos requiere metodologías psicométricas específicas, que requieren mucho tiempo pero que valen la pena.<sup>153,157,158</sup> Las preguntas que debemos plantearnos en relación con la calidad de vida felina dependen en última instancia de saber qué es lo que importa para cada gato. La información detallada sobre CV y los instrumentos de CVRS se proporciona en el material suplementario (Consulte la página 57 de este documento.).

### Environmental changes

Maintaining the five pillars of an appropriate environment requires modification to the cat’s home or lifestyle in the face of aging or disease. The five pillars are described in detail in the ‘2013 AAFP and ISFM Feline Environmental Needs Guidelines’,<sup>8</sup> and are summarized in Figure 9. Environmental changes and changes in care that may be required for aging cats are summarized in Tables 5 and 6.

### Cambios ambientales

Mantener los cinco pilares de un entorno adecuado requiere modificaciones en el hogar o el estilo de vida del gato frente al envejecimiento o enfermedad. Los cinco pilares se describen en detalle en la "Guía de necesidades ambientales felinas de la AAFP e ISFM 2013",<sup>8</sup> y se resumen en la Figura 9. Los cambios ambientales y los cambios en la atención que pueden ser necesarios para los gatos que envejecen son resumidos en las Tablas 5 y 6.

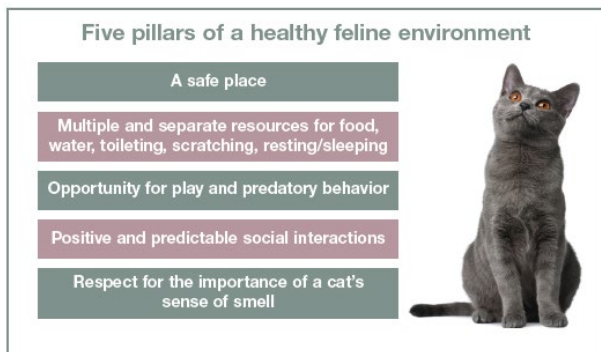

Figura 9. Los cinco pilares de un entorno apropiado

- ✓ Un lugar seguro
- ✓ Recursos múltiples y separados para la alimentación, agua, ir al baño, rascarse, descansar / dormir
- ✓ Oportunidad de juego y comportamiento depredador.
- ✓ Interacciones sociales positivas y predecibles
- ✓ Respeto por la importancia del gato sentido del olfato

| Health issue      | Provide                                                                                                               | Outcome                                                                           |
|-------------------|-----------------------------------------------------------------------------------------------------------------------|-----------------------------------------------------------------------------------|
| DJD<br>Sarcopenia | <input type="checkbox"/> Steps or ramps to access elevated places                                                     | ✓ Maintains access to a safe place                                                |
|                   | <input type="checkbox"/> Low entry/easy access litter box                                                             | ✓ Maintains toileting habits                                                      |
|                   | <input type="checkbox"/> Assisted grooming                                                                            | ✓ Maintains coat hygiene                                                          |
|                   | <input type="checkbox"/> Raised food and water bowls                                                                  | ✓ Easier to reach essential resources, and maintains caloric intake and hydration |
|                   | <input type="checkbox"/> Warm resting sites                                                                           | ✓ Maintains body heat                                                             |
| DM<br>CKD         | <input type="checkbox"/> Multiple, various configuration drinking stations in different locations throughout the home | ✓ Provides easy access to water all of the time                                   |
| CDS               | <input type="checkbox"/> Stable environment: do not rearrange the cat's major resources (food, water, litter boxes)   | ✓ Assists the cat to locate essential resources                                   |

Consulte la página 76 de este documento para ver Tabla 5

| Table 6 Suggested enhanced care for aging cats                                                                                                                                                                                                                                                                                                                                                                                                                                                                                                                                                                                                         | Consulte la página 77 de este documento para ver Tabla 6                                                                                                                                                                                                                                                                                                                                                                                                                                                                                                                                                                                                                                                                                                                                                 |           |                  |                                                      |                      |  |                       |                                                                             |                   |                                       |  |
|--------------------------------------------------------------------------------------------------------------------------------------------------------------------------------------------------------------------------------------------------------------------------------------------------------------------------------------------------------------------------------------------------------------------------------------------------------------------------------------------------------------------------------------------------------------------------------------------------------------------------------------------------------|----------------------------------------------------------------------------------------------------------------------------------------------------------------------------------------------------------------------------------------------------------------------------------------------------------------------------------------------------------------------------------------------------------------------------------------------------------------------------------------------------------------------------------------------------------------------------------------------------------------------------------------------------------------------------------------------------------------------------------------------------------------------------------------------------------|-----------|------------------|------------------------------------------------------|----------------------|--|-----------------------|-----------------------------------------------------------------------------|-------------------|---------------------------------------|--|
| <table border="1"> <thead> <tr> <th>Enhanced care</th> <th>Rationale</th> </tr> </thead> <tbody> <tr> <td>Flavor enhancers</td> <td>With age, sensory function declines, including smell</td> </tr> <tr> <td>Strong smelling food</td> <td></td> </tr> <tr> <td>Regular nail trimming</td> <td>Nails are more brittle and scratching behaviors may be decreased due to DJD</td> </tr> <tr> <td>Assisted grooming</td> <td>Self-grooming may be inhibited by DJD</td> </tr> </tbody> </table>                                                                                                                                                           | Enhanced care                                                                                                                                                                                                                                                                                                                                                                                                                                                                                                                                                                                                                                                                                                                                                                                            | Rationale | Flavor enhancers | With age, sensory function declines, including smell | Strong smelling food |  | Regular nail trimming | Nails are more brittle and scratching behaviors may be decreased due to DJD | Assisted grooming | Self-grooming may be inhibited by DJD |  |
| Enhanced care                                                                                                                                                                                                                                                                                                                                                                                                                                                                                                                                                                                                                                          | Rationale                                                                                                                                                                                                                                                                                                                                                                                                                                                                                                                                                                                                                                                                                                                                                                                                |           |                  |                                                      |                      |  |                       |                                                                             |                   |                                       |  |
| Flavor enhancers                                                                                                                                                                                                                                                                                                                                                                                                                                                                                                                                                                                                                                       | With age, sensory function declines, including smell                                                                                                                                                                                                                                                                                                                                                                                                                                                                                                                                                                                                                                                                                                                                                     |           |                  |                                                      |                      |  |                       |                                                                             |                   |                                       |  |
| Strong smelling food                                                                                                                                                                                                                                                                                                                                                                                                                                                                                                                                                                                                                                   |                                                                                                                                                                                                                                                                                                                                                                                                                                                                                                                                                                                                                                                                                                                                                                                                          |           |                  |                                                      |                      |  |                       |                                                                             |                   |                                       |  |
| Regular nail trimming                                                                                                                                                                                                                                                                                                                                                                                                                                                                                                                                                                                                                                  | Nails are more brittle and scratching behaviors may be decreased due to DJD                                                                                                                                                                                                                                                                                                                                                                                                                                                                                                                                                                                                                                                                                                                              |           |                  |                                                      |                      |  |                       |                                                                             |                   |                                       |  |
| Assisted grooming                                                                                                                                                                                                                                                                                                                                                                                                                                                                                                                                                                                                                                      | Self-grooming may be inhibited by DJD                                                                                                                                                                                                                                                                                                                                                                                                                                                                                                                                                                                                                                                                                                                                                                    |           |                  |                                                      |                      |  |                       |                                                                             |                   |                                       |  |
| <h3>End of life</h3>                                                                                                                                                                                                                                                                                                                                                                                                                                                                                                                                                                                                                                   | <h3>Al final de la vida</h3>                                                                                                                                                                                                                                                                                                                                                                                                                                                                                                                                                                                                                                                                                                                                                                             |           |                  |                                                      |                      |  |                       |                                                                             |                   |                                       |  |
| <p><b>Palliative and hospice care</b></p> <p>In human medicine, when a life-ending diagnosis is made, the conventional default has been to treat and prolong life, but with the growth of palliative care and hospice specialists, there are now options on how 'the end will be'. Palliative and hospice care are still relatively new specialties in human medicine and even newer in veterinary medicine.<sup>159</sup> The general public often believe hospice is 'a place' and means 'giving up.' There is a clear need to educate people on what is really the case – for cat owners, a possibility of their cat living well until the end.</p> | <p><b>Cuidados paliativos y de hospicio</b></p> <p>En medicina humana, cuando se hace un diagnóstico de final de vida, el valor predeterminado convencional ha sido tratar y prolongar la vida, pero con el crecimiento de los especialistas en cuidados paliativos y hospicios, ahora hay opciones sobre cómo "será el final". Los cuidados paliativos y de hospicio son todavía especialidades relativamente nuevas en la medicina humana e incluso más nuevas en la medicina veterinaria.<sup>159</sup> El público en general cree a menudo que los cuidados paliativos son 'un lugar' y significa 'darse por vencido'. Existe una clara necesidad de educar a las personas sobre lo que realmente es el caso - para los dueños de gatos, la posibilidad de que su gato viva bien hasta el final.</p> |           |                  |                                                      |                      |  |                       |                                                                             |                   |                                       |  |
| <p>* Palliative care addresses the treatment of pain, mobility impairment, nutritional deficits, anxiety and other clinical signs such as nausea and vomiting to achieve the best quality of life regardless of disease outcome (eg, 'comfort care' with or without curative intent).</p> <p>It applies to curable or chronic conditions as well as end of life care, and it may be provided to patients of any age and at any time during the course of an illness. Palliative care includes supporting owners caring for their pet(s) and helping them make decisions.</p>                                                                           | <p>* Los cuidados paliativos se dirigen al tratamiento del dolor, el deterioro de la movilidad, las deficiencias nutricionales, la ansiedad y otros signos clínicos como náuseas y vómitos para lograr la mejor calidad de vida independientemente del resultado de la enfermedad (p. ej., "Cuidados de alivio" con o sin intención curativa).</p> <p>Se aplica a afecciones curables o crónicas, así como a como atención al final de la vida, y se puede proporcionar a pacientes de cualquier edad y en cualquier momento durante el curso de una enfermedad. Los cuidados paliativos incluyen apoyar a los dueños que cuidan a sus mascotas y ayudarlos a tomar decisiones.</p>                                                                                                                      |           |                  |                                                      |                      |  |                       |                                                                             |                   |                                       |  |

|                                                                                                                                                                                                                                                                                                                                                                                                                                                                                                                                                                                                                                                                                                                                                                                                                                                                                               |                                                                                                                                                                                                                                                                                                                                                                                                                                                                                                                                                                                                                                                                                                                                                                                                                                                                                                                                                                                                                                                                                            |
|-----------------------------------------------------------------------------------------------------------------------------------------------------------------------------------------------------------------------------------------------------------------------------------------------------------------------------------------------------------------------------------------------------------------------------------------------------------------------------------------------------------------------------------------------------------------------------------------------------------------------------------------------------------------------------------------------------------------------------------------------------------------------------------------------------------------------------------------------------------------------------------------------|--------------------------------------------------------------------------------------------------------------------------------------------------------------------------------------------------------------------------------------------------------------------------------------------------------------------------------------------------------------------------------------------------------------------------------------------------------------------------------------------------------------------------------------------------------------------------------------------------------------------------------------------------------------------------------------------------------------------------------------------------------------------------------------------------------------------------------------------------------------------------------------------------------------------------------------------------------------------------------------------------------------------------------------------------------------------------------------------|
| <p>* Hospice care is a specialized form of palliative care that focuses on caring for patients during the end stages of an illness. In veterinary medicine this can include comfort care without curative intent, either because there are no options, or the owners have chosen not to pursue treatment because the likelihood of success is small, the side effects outweigh the benefits, or it is beyond their financial budget. Hospice care for feline patients does not preclude euthanasia and can be looked at as bridging the gap between a terminal illness and euthanasia; it may constitute a short (days) or longer (weeks to months) period of time. Hospice care also includes supporting the pet’s family.</p>                                                                                                                                                               | <p>* El cuidado de hospicio es una forma especializada de cuidados paliativos que se enfoca en cuidar a los pacientes durante las etapas finales de una enfermedad. En medicina veterinaria, esto puede incluir cuidados de la comodidad sin intención curativa, ya sea porque no hay opciones o porque los propietarios han optado por no seguir el tratamiento porque la probabilidad de éxito es pequeña, los efectos secundarios superan los beneficios o está más allá de su presupuesto financiero. El cuidado de hospicio para pacientes felinos no excluye la eutanasia y puede considerarse como un puente entre una enfermedad terminal y la eutanasia; puede constituir un período de tiempo corto (días) o más largo (semanas a meses). El cuidado del hospicio también incluye el apoyo a la familia de la mascota.</p>                                                                                                                                                                                                                                                       |
| <p><b>The budgets of care</b></p> <p>Some disease-specific QOL questionnaires consider the cat itself as well as the cat’s owners.<sup>159</sup> A tool developed to examine the impact of skin disease showed that QOL was different between healthy cats and those with allergic dermatitis, and that in the latter group QOL improved with treatment.<sup>160</sup> Disturbed sleep, dislike of treatments, changes in appetite and disrupted daily routines contributed to poor QOL. For owners, the psychologic consequences of caring for cats with skin disease included feelings of sorrow, frustration, guilt and stress related to administration of medication or treatments. Caring for these cats takes time and money, and the human–animal bond may be negatively impacted. The severity of the cat’s disease correlated significantly with the owner’s QOL.<sup>159</sup></p> | <p><b>Los presupuestos de cuidados</b></p> <p>Algunos cuestionarios de CV específicos de la enfermedad consideran al gato mismo así como a sus dueños.<sup>159</sup> Una herramienta desarrollada para examinar el impacto de las enfermedades de la piel mostró que la calidad de vida era diferente entre gatos sanos y aquellos con dermatitis alérgica, y que en el último grupo la CV mejoró con el tratamiento.<sup>160</sup> La alteración del sueño, la aversión a los tratamientos, los cambios en el apetito y la alteración de las rutinas diarias contribuyeron a una mala CV. Para los dueños de mascotas, las consecuencias psicológicas del cuidado de gatos con enfermedades de la piel incluyen sentimientos de tristeza, frustración, culpa y estrés relacionados con la administración de medicamentos o tratamientos. El cuidado de estos gatos requiere tiempo y dinero, y el vínculo entre el humano y el animal puede verse afectado negativamente. La gravedad de la enfermedad del gato se correlacionó significativamente con la CV del dueño.<sup>159</sup></p> |

It is important to consider the impact of a cat's illness on the owner. The Task Force recognizes that cat owners have four budgets that must all be considered when making treatment plans, including euthanasia: financial, time, emotional and physical (Figure 10). The 'weight' that each of these carries will vary among different owners and these budgets, combined with the pet's QOL, will guide clinical decisions.

Es importante considerar el impacto de la enfermedad de un gato en el dueño. El grupo de trabajo reconoce que los dueños de gatos tienen cuatro presupuestos que deben tenerse en cuenta al hacer planes de tratamiento, incluida la eutanasia: financiero, de tiempo, emocional y físico (Figura 10). El "peso" que lleva cada uno de ellos variará entre los diferentes propietarios y estos presupuestos, combinados con la CVde la mascota, guiarán las decisiones clínicas.

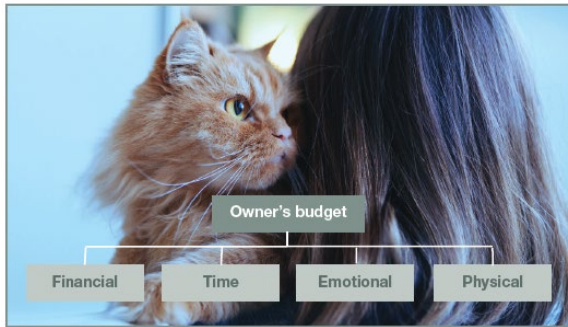

Figure 10. The four budgets of care. *Courtesy of Sheilah Robertson*

Figura 10. Los cuatro presupuestos del cuidado. *Cortesía de Sheilah Robertson*

Owner's budget

Financial

Time

Emotional

Physical

Presupuesto del propietario

Financiero

Tiempo

Emocional

Físico

|                                                                                                                                                                                                                                                                                                                                                                                                                                                                                                                                                                                                                                                                                                                                                                                                                                                                                                                                                                                           |                                                                                                                                                                                                                                                                                                                                                                                                                                                                                                                                                                                                                                                                                                                                                                                                                                                                                                                                                                                                                                                                                                       |
|-------------------------------------------------------------------------------------------------------------------------------------------------------------------------------------------------------------------------------------------------------------------------------------------------------------------------------------------------------------------------------------------------------------------------------------------------------------------------------------------------------------------------------------------------------------------------------------------------------------------------------------------------------------------------------------------------------------------------------------------------------------------------------------------------------------------------------------------------------------------------------------------------------------------------------------------------------------------------------------------|-------------------------------------------------------------------------------------------------------------------------------------------------------------------------------------------------------------------------------------------------------------------------------------------------------------------------------------------------------------------------------------------------------------------------------------------------------------------------------------------------------------------------------------------------------------------------------------------------------------------------------------------------------------------------------------------------------------------------------------------------------------------------------------------------------------------------------------------------------------------------------------------------------------------------------------------------------------------------------------------------------------------------------------------------------------------------------------------------------|
| <p><b>Ethical decision-making and difficult conversations</b></p> <p>When a serious illness is diagnosed, our duty is to be honest with the client, but many find this type of news difficult to deliver. Owners may request life-prolonging treatments that we feel are futile and harmful, resulting in significant ethical stress.<sup>150,161</sup> If the approach to ethical decision-making was less subjective and personal, it might be possible to decrease some stress within our profession. A veterinary working group set up by the European College of Veterinary Anaesthesia and Analgesia has created the 'Veterinary Ethics Tool (VET)' to assist in ethical decision-making. It employs a series of checklists and tables and uses a traffic light system with green (valid reasons for the clinical procedure), orange (reconsider procedure and your responsibilities) and red (consider alternative treatment options) to guide the veterinarian.<sup>162</sup></p> | <p><b>Toma de decisiones éticas y conversaciones difíciles</b></p> <p>Cuando se diagnostica una enfermedad grave, nuestro deber es ser honestos con el cliente, pero muchos encuentran este tipo de noticias difíciles de dar. Los dueños pueden solicitar tratamientos para prolongar la vida que consideramos inútiles y dañinos, lo que resulta en un estrés ético significativo.<sup>150,161</sup> Si el enfoque de la toma de decisiones éticas fuera menos subjetivo y personal, podría ser posible disminuir algo de estrés dentro de nuestra profesión. Un grupo de trabajo veterinario creado por el Colegio Europeo de Anestesia y Analgesia Veterinaria ha creado la "Herramienta de ética veterinaria (VET)" para ayudar en la toma de decisiones éticas. Este emplea una serie de listas de verificación y tablas, y utiliza un sistema de semáforo con color verde (razones válidas para el procedimiento clínico), naranja (reconsidere el procedimiento y sus responsabilidades) y rojo (considere opciones de tratamiento alternativas) para guiar al veterinario.<sup>162</sup></p> |
| <p>The 'Serious Veterinary Illness Conversation Guide' is another resource based on similar recommendations developed for human physicians dealing with patients at the end of life.<sup>160</sup> Serious illness conversation guidelines and checklists can help keep us on track, navigate complex issues and develop a plan to move forward. A key component of this conversation is to ask the owner what their cat would want given the situation they are in; this helps reframe the owner's thought process away from what they want. It is important to use the correct gender and name of the cat during these conversations.</p>                                                                                                                                                                                                                                                                                                                                               | <p>La 'Guía de conversación sobre enfermedades veterinarias graves' es otro recurso basado en recomendaciones similares desarrolladas para médicos humanos que tratan con pacientes al final de la vida.<sup>160</sup> La guía y listas de verificación para conversaciones sobre enfermedades graves pueden ayudarnos a mantenernos en el camino correcto, navegar por problemas complejos y desarrollar un plan para avanzar. Un componente clave de esta conversación es preguntarle al dueño qué querría su gato dada la situación en la que se encuentra; esto ayuda a replantear el proceso de pensamiento del propietario de lo que quiere. Es importante utilizar el género y el nombre correctos del gato durante estas conversaciones.</p>                                                                                                                                                                                                                                                                                                                                                  |

|                                                                                                                                                                                                                                                                                                                                                                                                                                                                                                                                                                                                                                                                                                                                                              |                                                                                                                                                                                                                                                                                                                                                                                                                                                                                                                                                                                                                                                                                                                                                                                                                                                                                                                   |
|--------------------------------------------------------------------------------------------------------------------------------------------------------------------------------------------------------------------------------------------------------------------------------------------------------------------------------------------------------------------------------------------------------------------------------------------------------------------------------------------------------------------------------------------------------------------------------------------------------------------------------------------------------------------------------------------------------------------------------------------------------------|-------------------------------------------------------------------------------------------------------------------------------------------------------------------------------------------------------------------------------------------------------------------------------------------------------------------------------------------------------------------------------------------------------------------------------------------------------------------------------------------------------------------------------------------------------------------------------------------------------------------------------------------------------------------------------------------------------------------------------------------------------------------------------------------------------------------------------------------------------------------------------------------------------------------|
| <p><b>Anticipatory grief</b></p> <p>Anticipatory grief is a normal process through which those who will be left behind may begin experiencing emotional changes associated with death. Anticipatory grief has many of the hallmarks of grief experienced after a loss and may lessen the intensity of grief reactions after the actual death.<sup>163</sup> The impact of losing a pet on individuals or families must not be underestimated. Proactively supporting families during this time is important and can include providing resources or referrals to grief counselors. The veterinary team can provide information so owners can prepare for what is to come; for example, explaining the euthanasia process removes elements of the unknown.</p> | <p><b>Duelo anticipado</b> <span style="float: right;">EI</span></p> <p>duelo anticipado es un proceso normal a través del cual aquellos que se quedarán atrás pueden comenzar a experimentar cambios emocionales asociados con la muerte. El duelo anticipado tiene muchas de las características del duelo experimentado después de una pérdida y puede disminuir la intensidad de las reacciones de duelo después de la muerte real.<sup>163</sup> No se debe subestimar el impacto de perder una mascota en las personas o familias. El apoyo proactivo a las familias durante este tiempo es importante y puede incluir proporcionar recursos o referencias a consejeros de duelo. El equipo veterinario puede proporcionar información para que los propietarios puedan prepararse para lo que está por venir; por ejemplo, explicar el proceso de eutanasia para eliminar elementos de lo desconocido.</p> |
| <p><b>Euthanasia</b></p> <p>Euthanasia is a humane endpoint; it is a treatment option for a sick cat, not a failure. End of life decisions are among the hardest decisions owners make. How well veterinarians conduct the 'last appointment' and support the owners impacts if they obtain another pet and return as clients. The AAFP has created an End of Life Educational Toolkit<sup>164</sup> that contains practical information about decision-making, QOL, the euthanasia process, euthanasia experience, final arrangements, FAQs and client resources.</p>                                                                                                                                                                                       | <p><b>Eutanasia</b></p> <p>La eutanasia es un punto final humano; es una opción de tratamiento para un gato enfermo, no es un fracaso. Las decisiones sobre el final de la vida se encuentran entre las decisiones más difíciles que toman los dueños de mascotas. Qué tan bien los veterinarios llevan a cabo la 'última cita' y apoyan a los dueños impacta si obtienen otra mascota y regresan como clientes. La AAFP ha creado un paquete de herramientas educativas para el final de la vida<sup>164</sup> que contiene información práctica sobre la toma de decisiones, la calidad de vida, el proceso de eutanasia, la experiencia de eutanasia, los arreglos finales, las preguntas frecuentes y los recursos del cliente.</p>                                                                                                                                                                           |



| <b>Supplementary material</b>                                                                                                                                                                                                                                                                                                                                                                                                                                                                                                                                                                                                                                                                                                                                                                                                                                                                                                                                                                                                                                                                                                                                                                                                                                                                                                                                                                                                                                                                                                                                         | <b>Material suplementario</b>                                                                                                                                                                                                                                                                                                                                                                                                                                                                                                                                                                                                                                                                                                                                                                                                                                                                                             |
|-----------------------------------------------------------------------------------------------------------------------------------------------------------------------------------------------------------------------------------------------------------------------------------------------------------------------------------------------------------------------------------------------------------------------------------------------------------------------------------------------------------------------------------------------------------------------------------------------------------------------------------------------------------------------------------------------------------------------------------------------------------------------------------------------------------------------------------------------------------------------------------------------------------------------------------------------------------------------------------------------------------------------------------------------------------------------------------------------------------------------------------------------------------------------------------------------------------------------------------------------------------------------------------------------------------------------------------------------------------------------------------------------------------------------------------------------------------------------------------------------------------------------------------------------------------------------|---------------------------------------------------------------------------------------------------------------------------------------------------------------------------------------------------------------------------------------------------------------------------------------------------------------------------------------------------------------------------------------------------------------------------------------------------------------------------------------------------------------------------------------------------------------------------------------------------------------------------------------------------------------------------------------------------------------------------------------------------------------------------------------------------------------------------------------------------------------------------------------------------------------------------|
| <p>The following files are available online at <a href="http://jfms.com">jfms.com</a> and can be accessed at <a href="http://catvets.com/senior-care">catvets.com/senior-care</a>:</p> <ul style="list-style-type: none"><li>* Video demonstrating myofascial examination technique.</li><li>* Video showing cat friendly tips for thorough feline dental examinations.</li><li>* Information on QOL and HRQOL instruments.</li><li>* Client brochure (see Appendix, page 637).</li><li>* Recommended resources.</li></ul> <p>Supplementary materials that can be found at <a href="http://catvets.com/senior-care">catvets.com/senior-care</a>, in addition to the resources listed above, include 'Why are comorbidities the "new" norm for cats?'<sup>123</sup> and a video demonstrating pain when jumping.</p>                                                                                                                                                                                                                                                                                                                                                                                                                                                                                                                                                                                                                                                                                                                                                   | <p>Los siguientes archivos están disponibles en línea en <a href="http://jfms.com">jfms.com</a> y se puede acceder a ellos en <a href="http://catvets.com/senior-care">catvets.com/senior-care</a>:</p> <ul style="list-style-type: none"><li>* Video que demuestra la técnica de examen miofascial.</li><li>* Video que muestra consejos amigables con los gatos para exámenes dentales exhaustivos en felinos.</li><li>* Información sobre instrumentos de CV y CVRS.</li><li>* Folleto para el cliente (consulte el Apéndice, página 60-61).</li><li>* Recursos recomendados.</li></ul> <p>Los materiales complementarios que se pueden encontrar en <a href="http://catvets.com/senior-care">catvets.com/senior-care</a>, además de los recursos enumerados anteriormente, incluyen "¿Por qué las comorbilidades son la "nueva "norma para los gatos?"<sup>123</sup> y un video que demuestra el dolor al saltar.</p> |
| 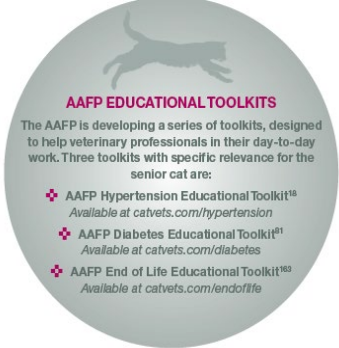 <p><b>AAFP EDUCATIONAL TOOLKITS</b></p> <p>The AAFP is developing a series of toolkits, designed to help veterinary professionals in their day-to-day work. Three toolkits with specific relevance for the senior cat are:</p> <ul style="list-style-type: none"><li>* AAFP Hypertension Educational Toolkit<sup>18</sup><br/><i>Available at <a href="http://catvets.com/hypertension">catvets.com/hypertension</a></i></li><li>* AAFP Diabetes Educational Toolkit<sup>81</sup><br/><i>Available at <a href="http://catvets.com/diabetes">catvets.com/diabetes</a></i></li><li>* AAFP End of Life Educational Toolkit<sup>163</sup><br/><i>Available at <a href="http://catvets.com/endoflife">catvets.com/endoflife</a></i></li></ul> <p><b>AAFP EDUCATIONAL TOOLKITS</b></p> <p>The AAFP is developing a series of toolkits, designed to help veterinary professionals in their day-to-day work. Three toolkits with specific relevance for the senior cat are:</p> <ul style="list-style-type: none"><li>* AAFP Hypertension Educational Toolkit<sup>18</sup><br/><i>Available at <a href="http://catvets.com/hypertension">catvets.com/hypertension</a></i></li><li>* AAFP Diabetes Educational Toolkit<sup>81</sup><br/><i>Available at <a href="http://catvets.com/diabetes">catvets.com/diabetes</a></i></li><li>* AAFP End of Life Educational Toolkit<sup>163</sup><br/><i>Available at <a href="http://catvets.com/endoflife">catvets.com/endoflife</a></i></li></ul> | <p><b>PAQUETE DE HERRAMIENTAS EDUCATIVAS AAFP</b></p> <p>La AAFP está desarrollando una serie de herramientas diseñadas para ayudar a los profesionales veterinarios en su trabajo diario. Tres conjuntos de herramientas con relevancia específica para el gato mayor son:</p> <ul style="list-style-type: none"><li>* Kit de herramientas educativas sobre hipertensión AAFP<sup>18</sup><br/><i>Disponible en <a href="http://catvets.com/hypertension">catvets.com/hypertension</a></i></li><li>* Kit de herramientas educativas sobre diabetes de la AAFP<sup>81</sup><br/><i>Disponible en <a href="http://catvets.com/diabetes">catvets.com/diabetes</a></i></li><li>* Kit de herramientas educativas sobre el final de la vida útil de la AAFP<sup>163</sup><br/><i>Disponible en <a href="http://catvets.com/endoflife">catvets.com/endoflife</a></i></li></ul>                                                  |

#### SUMMARY POINTS

- ❖ Cats are living longer and may mirror the aging process in their owners' lives; hence they are often an integral part of their caregivers' lives, giving hope and emotional support that an owner wants to preserve.
- ❖ Senior cats deserve the best possible care veterinary professionals can offer. This Guidelines document reflects a knowledge of senior cat care that allows the veterinarian to integrate compassion and dignity with outstanding behavioral, psychological and medical recommendations. It utilizes the greatly increased diagnostic and therapeutic options that are more widely available today.
- ❖ Discussions with owners throughout a cat's senior years allow veterinarians to set the stage for optimal feline aging, help the owner to understand what the cat may experience and suggest modifications at home that ease the cat's transition toward life's end.
- ❖ Owners who are aware of what behaviors and activities to observe, and the significance of various changes in these behaviors, can then choose which tests and treatments may be most beneficial to the cat, while causing the fewest burdens.
- ❖ By building a trusting bond, the veterinarian and owner can ensure that major decisions truly represent an understanding of what is best for each individual cat.

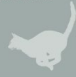

#### SUMMARY POINTS

- \* Cats are living longer and may mirror the aging process in their owners' lives; hence they are often an integral part of their caregivers' lives, giving hope and emotional support that an owner wants to preserve.
- \* Senior cats deserve the best possible care veterinary professionals can offer. This Guidelines document reflects a knowledge of senior cat care that allows the veterinarian to integrate compassion and dignity with outstanding behavioral, psychological and medical recommendations. It utilizes the greatly increased diagnostic and therapeutic options that are more widely available today.
- \* Discussions with owners throughout a cat's senior years allow veterinarians to set the stage for optimal feline aging, help the owner to understand what the cat may experience and suggest modifications at home that ease the cat's transition toward life's end.
- \* Owners who are aware of what behaviors and activities to observe, and the significance of various changes in these behaviors, can then choose which tests and treatments may be most beneficial to the cat, while causing the fewest burdens.
- \* By building a trusting bond, the veterinarian and owner can ensure that major decisions truly represent an understanding of what is best for each individual cat.

#### PUNTOS DE RESUMEN

- \* Los gatos viven más y pueden reflejar el proceso de envejecimiento en la vida de sus dueños; por lo tanto, a menudo son una parte integral de la vida de sus cuidadores, brindando esperanza y apoyo emocional al dueño que desea preservar.
- \* Los gatos mayores merecen la mejor atención posible que los profesionales veterinarios puedan ofrecer. Este documento de guía refleja un conocimiento del cuidado de gatos mayores que permite al veterinario integrar la compasión y la dignidad con comportamientos sobresalientes, con recomendaciones médicas, psicológicas y de comportamiento. Utiliza las opciones terapéuticas y de diagnóstico mucho mayores que están más ampliamente disponibles en la actualidad.
- \* Las conversaciones con los dueños durante la vejez de un gato permiten a los veterinarios preparar el escenario para un envejecimiento felino óptimo, ayudar al dueño a comprender lo que el gato puede experimentar y sugerir modificaciones en el hogar que faciliten la transición del gato hacia el final de la vida.
- \* Los dueños que son conscientes de qué comportamientos y actividades deben observar, y la importancia de varios cambios en estos comportamientos, pueden elegir qué pruebas y tratamientos pueden ser más beneficiosos para el gato y, al mismo tiempo, causar la menor cantidad de cargas.
- \* Al construir un vínculo de confianza, el veterinario y el dueño pueden asegurarse de que las decisiones importantes realmente representen una comprensión de lo que es mejor para cada gato en particular.

|                                                                                                                                                                                                                                                                                                                                                                                                                                                                                                                                                 |                                                                                                                                                                                                                                                                                                                                                                                                                                                                                                                                                                          |
|-------------------------------------------------------------------------------------------------------------------------------------------------------------------------------------------------------------------------------------------------------------------------------------------------------------------------------------------------------------------------------------------------------------------------------------------------------------------------------------------------------------------------------------------------|--------------------------------------------------------------------------------------------------------------------------------------------------------------------------------------------------------------------------------------------------------------------------------------------------------------------------------------------------------------------------------------------------------------------------------------------------------------------------------------------------------------------------------------------------------------------------|
| <p><b>Acknowledgements</b></p>                                                                                                                                                                                                                                                                                                                                                                                                                                                                                                                  | <p><b>Agradecimientos</b></p>                                                                                                                                                                                                                                                                                                                                                                                                                                                                                                                                            |
| <p>The Task Force gratefully acknowledges the contribution of Dr Kathleen Neumann in the preparation of the Guidelines manuscript.</p>                                                                                                                                                                                                                                                                                                                                                                                                          | <p>El grupo de trabajo agradece la contribución de la Dra. Kathleen Neumann en la preparación del manuscrito de las guías.</p>                                                                                                                                                                                                                                                                                                                                                                                                                                           |
| <p><b>Conflict of interest</b></p>                                                                                                                                                                                                                                                                                                                                                                                                                                                                                                              | <p><b>Conflicto de intereses</b></p>                                                                                                                                                                                                                                                                                                                                                                                                                                                                                                                                     |
| <p>Hazel Carney is a speaker for Royal Canin. Jessica Quimby is a key opinion leader for Boehringer Ingelheim Animal Health USA, Inc., Dechra, Elanco, Gallant Health Care, Heska, Hill's Pet Nutrition, Inc., IDEXX Laboratories, Inc., Kindred Biosciences, Inc., Purina ProPlan Veterinary Diets, Royal Canin, and Zoetis Petcare. Sheilah Robertson acts variously as a key opinion leader, speaker and consultant for Elanco, Zoetis Petcare, and Jurox. The other members of the Task Force have no conflicts of interest to declare.</p> | <p>Hazel Carney es oradora de Royal Canin. Jessica Quimby es una líder de opinión clave para Boehringer Ingelheim Animal Health USA, Inc., Dechra, Elanco, Gallant Health Care, Heska, Hill's Pet Nutrition, Inc., IDEXX Laboratories, Inc., Kindred Biosciences, Inc., Purina ProPlan Veterinary Diets, Royal Canin y Zoetis Petcare. Sheilah Robertson actúa de diversas formas como líder de opinión clave, oradora y consultora de Elanco, Zoetis Petcare y Jurox. Los demás miembros del grupo de trabajo no tienen ningún conflicto de intereses que declarar.</p> |
| <p><b>Funding</b></p>                                                                                                                                                                                                                                                                                                                                                                                                                                                                                                                           | <p><b>Financiamiento</b></p>                                                                                                                                                                                                                                                                                                                                                                                                                                                                                                                                             |
| <p>These Guidelines were supported by an educational grant to the AAFP from Boehringer Ingelheim Animal Health USA Inc., IDEXX Laboratories, Inc., Merck Animal Health, Purina Pro Plan Veterinary Diets, Royal Canin, and Zoetis Petcare. The authors received no financial support for the research, authorship, and/or publication of this article.</p>                                                                                                                                                                                      | <p>Estas pautas fueron respaldadas por una subvención educativa a la AAFP de Boehringer Ingelheim Animal Health USA Inc., IDEXX Laboratories, Inc., Merck Animal Health, Purina Pro Plan Veterinary Diets, Royal Canin y Zoetis Petcare. Los autores no recibieron apoyo financiero para la investigación, autoría y / o publicación de este artículo.</p>                                                                                                                                                                                                               |
| <p><b>Ethical approval</b></p>                                                                                                                                                                                                                                                                                                                                                                                                                                                                                                                  | <p><b>Aprobación ética</b></p>                                                                                                                                                                                                                                                                                                                                                                                                                                                                                                                                           |
| <p>This work did not involve the use of animals and therefore ethical approval was not specifically required for publication in <i>JFMS</i>.</p>                                                                                                                                                                                                                                                                                                                                                                                                | <p>Este trabajo no implicó el uso de animales y, por lo tanto, no se requirió específicamente una aprobación ética para su publicación en <i>JFMS</i>.</p>                                                                                                                                                                                                                                                                                                                                                                                                               |
| <p><b>Informed consent</b></p>                                                                                                                                                                                                                                                                                                                                                                                                                                                                                                                  | <p><b>Consentimiento informado</b></p>                                                                                                                                                                                                                                                                                                                                                                                                                                                                                                                                   |
| <p>This work did not involve the use of animals (including cadavers) and therefore informed consent was not required. For any animals or people individually identifiable within this publication, informed consent (verbal or written) for their use in the publication was obtained from the people involved.</p>                                                                                                                                                                                                                             | <p>Este trabajo no implicó el uso de animales (incluyendo los cadáveres) y, por lo tanto, no se requirió el consentimiento informado. Para cualquier animal o persona identificable individualmente dentro de esta publicación, se obtuvo el consentimiento informado (verbal o escrito) para su uso en la publicación de las personas involucradas.</p>                                                                                                                                                                                                                 |

|                                                                                                                                                                                                                                                                                                                                                                                                                                                                                                                                                                                                                                                                                                                                                                                                                                                                                                                                                                                                                                                                                                                                                                                                                                                                                                                                                                                                                                                                                                                                                                                                                                                   |                                                                                                                                                                                                                                                                                                                                                                                                                                                                                                                                        |
|---------------------------------------------------------------------------------------------------------------------------------------------------------------------------------------------------------------------------------------------------------------------------------------------------------------------------------------------------------------------------------------------------------------------------------------------------------------------------------------------------------------------------------------------------------------------------------------------------------------------------------------------------------------------------------------------------------------------------------------------------------------------------------------------------------------------------------------------------------------------------------------------------------------------------------------------------------------------------------------------------------------------------------------------------------------------------------------------------------------------------------------------------------------------------------------------------------------------------------------------------------------------------------------------------------------------------------------------------------------------------------------------------------------------------------------------------------------------------------------------------------------------------------------------------------------------------------------------------------------------------------------------------|----------------------------------------------------------------------------------------------------------------------------------------------------------------------------------------------------------------------------------------------------------------------------------------------------------------------------------------------------------------------------------------------------------------------------------------------------------------------------------------------------------------------------------------|
| <p><b>Endorsement</b></p>                                                                                                                                                                                                                                                                                                                                                                                                                                                                                                                                                                                                                                                                                                                                                                                                                                                                                                                                                                                                                                                                                                                                                                                                                                                                                                                                                                                                                                                                                                                                                                                                                         | <p><b>Aprobación</b></p>                                                                                                                                                                                                                                                                                                                                                                                                                                                                                                               |
| <p>The International Society of Feline Medicine (ISFM) is pleased to endorse these practice guidelines from the AAFP.</p>                                                                                                                                                                                                                                                                                                                                                                                                                                                                                                                                                                                                                                                                                                                                                                                                                                                                                                                                                                                                                                                                                                                                                                                                                                                                                                                                                                                                                                                                                                                         | <p>La Sociedad Internacional de Medicina Felina (ISFM) se complace en respaldar la guía de práctica de la AAFP.</p>                                                                                                                                                                                                                                                                                                                                                                                                                    |
| <p><b>Disclaimer</b></p>                                                                                                                                                                                                                                                                                                                                                                                                                                                                                                                                                                                                                                                                                                                                                                                                                                                                                                                                                                                                                                                                                                                                                                                                                                                                                                                                                                                                                                                                                                                                                                                                                          | <p><b>Descargo de responsabilidad</b></p>                                                                                                                                                                                                                                                                                                                                                                                                                                                                                              |
| <p>This publication is intended as a full and faithful translation of the original English language version. The authors, editors, Societies and Publisher will not accept any legal responsibility for any errors or omissions that may be made in this translation. The Societies (AAFP and ISFM) and Publisher (SAGE Publishing) make no warranty, express or implied, with respect to the material contained herein and accept no liability for any errors made during translation of the article.</p>                                                                                                                                                                                                                                                                                                                                                                                                                                                                                                                                                                                                                                                                                                                                                                                                                                                                                                                                                                                                                                                                                                                                        | <p>Esta publicación está destinada a ser una traducción completa y fiel de la versión original en inglés. Los autores, editores, Sociedades y Editor no aceptarán ninguna responsabilidad legal por cualquier error u omisión que pueda cometerse en esta traducción. Las Sociedades (AAFP e ISFM) y el Editor (SAGE Publishing) no ofrecen ninguna garantía, expresa o implícita, con respecto al material contenido en este documento y no aceptan responsabilidad por los errores cometidos durante la traducción del artículo.</p> |
| <p style="text-align: center;"><b>Appendix: Client brochure</b></p>  <p style="text-align: center;"><b>Senior Cats Have Special Needs</b></p> <p>Our cats can live longer, better than ever before. Understanding the changing needs is critical in helping your aging cat live a long, happy life. To allow with your veterinarian, you can provide a good quality of life for your older cat. Caring for a senior cat can be a deeply rewarding experience that will enhance the uniquely special bond you and your cat share.</p> <p><b>WHAT IS A SENIOR CAT?</b><br/>     Cats go through five life stages: kitten, young adult, mature adult, and senior. They become a senior cat when they are 11 years old.</p> <p>Senior cats have very different needs and it is helpful to understand the physical and emotional changes that happen as your cat ages.</p> <p>Common age-related changes include:</p> <ul style="list-style-type: none"> <li>• Change in behavior and sleep patterns</li> <li>• Increased "barking" or meowing</li> <li>• Difficulty in movement (jumping, using stairs, instead of high-chairs, litter box)</li> <li>• Changes in sight and hearing</li> <li>• Decreased action of small and large intestine</li> <li>• Weight loss and loose stools</li> <li>• Difficulty urinating that need to be urinated more often</li> <li>• Decreased ability to absorb nutrients and increased need for protein</li> </ul> <p>Sponsored by:</p> <p></p> |                                                                                                                                                                                                                                                                                                                                                                                                                                                                                                                                        |

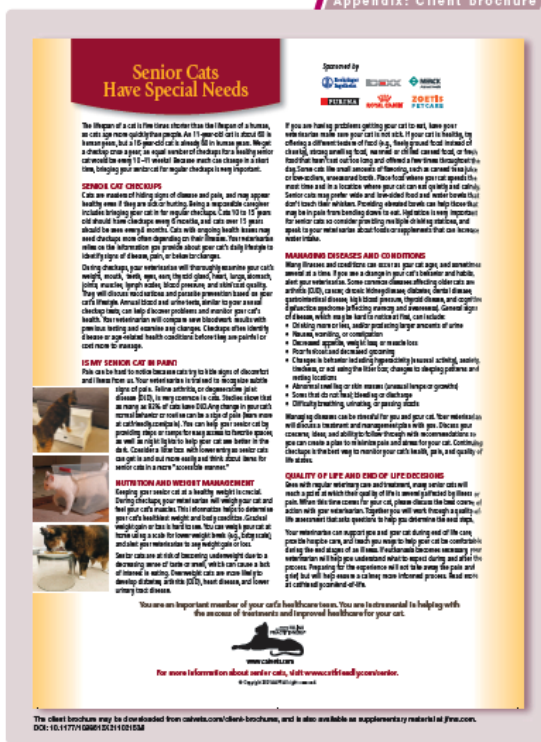

Appendix: Client brochure  
The client brochure may be downloaded from [catvets.com/client-brochures](http://catvets.com/client-brochures), and is also available as supplementary material at [jfms.com](http://jfms.com).  
DOI: 10.1177/1098612X211021538

Apéndice: Folleto del cliente  
El folleto del cliente se puede descargar de [catvets.com/client-brochures](http://catvets.com/client-brochures) y también está disponible como material complementario en [jfms.com](http://jfms.com).  
DOI: 10.1177 / 1098612X211021538

## Referencias

- 1 Pittari J, Rodan I, Beekman G, et al. American Association of Feline Practitioners: senior care guidelines. *J Feline Med Surg* 2009; 11: 763–778.
- 2 Quimby J, Gowland S, Carney HC, et al. 2021 AAHA/AAFP feline life stage guidelines. *J Feline Med Surg* 2021; 23: 211–233.
- 3 O'Neill DG, Church DB, McGreevy PD, et al. Longevity and mortality of cats attending primary care veterinary practices in England. *J Feline Med Surg* 2015; 17: 125–133.
- 4 Egenvall A, Nødtvedt A, Häggström J, et al. Mortality of life-insured Swedish cats during 1999–2006: age, breed, sex, and diagnosis. *J Vet Intern Med* 2009; 23: 1175–1183.
- 5 Ali S and Garcia JM. Sarcopenia, cachexia and aging: diagnosis, mechanisms and therapeutic options – a mini-review. *Gerontology* 2014; 60: 294–305.
- 6 Freeman LM. Cachexia and sarcopenia: emerging syndromes of importance in dogs and cats. *J Vet Intern Med* 2012; 26: 3–17.
- 7 Laflamme DP. Understanding the nutritional needs of healthy cats and those with diet-sensitive conditions. *Vet Clin North Am Small Anim Pract* 2020; 50: 905–924.
- 8 Ellis SLH, Rodan I, Carney HC, et al. AAFP and ISFM feline environmental needs guidelines. *J Feline Med Surg* 2013; 15: 219–230.
- 9 Miele A, Sordo L and Gunn-Moore DA. Feline aging: promoting physiologic and emotional well-being. *Vet Clin North Am Small Anim Pract* 2020; 50: 719–748.
- 10 Scherk M (ed). Feline practice: integrating medicine and well-being (part 1). *Vet Clin North Am Small Anim Pract* 2020; 50: 653–904.
- 11 Rodan I, Sundahl E, Carney H, et al. AAFP and ISFM feline-friendly handling guidelines. *J Feline Med Surg* 2011; 13: 364–375.
- 12 Epstein ME, Rodan I, Griffenhagen G, et al. 2015 AAHA/AAFP pain management guidelines for dogs and cats. *J Feline Med Surg* 2015; 17: 251–272.
- 13 Bijmans ES, Jepson RE, Chang YM, et al. Changes in systolic blood pressure over time in healthy cats and cats with chronic kidney disease. *J Vet Intern Med* 2015; 29: 855–861.
- 14 Jepson RE. Feline systemic hypertension. Classification and pathogenesis. *J Feline Med Surg* 2011; 13: 35–43.
- 15 Maggio F, DeFrancesco TC, Atkins CE, et al. Ocular lesions associated with systemic hypertension in cats: 69 cases (1985–1998). *J Am Vet Med Assoc* 2000; 217: 695–702.
- 16 Brown S, Atkins C, Bagley R, et al. Guidelines for the identification, evaluation, and management of systemic hypertension in dogs and cats. *J Vet Intern Med* 2007; 21: 542–558.
- 17 Taylor SS, Sparkes AH, Briscoe K, et al. ISFM consensus guidelines on the diagnosis and management of hypertension in cats. *J Feline Med Surg* 2017; 19: 288–303.
- 18 AAFP. 2021 Hypertension educational toolkit. Available at: [catvets.com/hypertension](http://catvets.com/hypertension).
- 19 Williams DL and Heath MF. Prevalence of feline cataract: results of a cross-sectional study of 2000 normal animals, 50 cats with diabetes and one hundred cats following dehydrational crises. *Vet Ophthalmol* 2006; 9: 341–349.
- 20 Guyonnet A, Donzel E, Bourguet A, et al. Epidemiology and clinical presentation of feline cataracts in france: a retrospective study of 268 cases. *Vet Ophthalmol* 2019; 22: 116–124.

- 21 Sebbag L, Kass PH and Maggs DJ. Reference values, intertest correlations, and test-retest repeatability of selected tear film tests in healthy cats. *J Am Vet Med Assoc* 2015; 246: 426–435.
- 22 Sandhas E, Merle R and Eule JC. Consider the eye in preventive healthcare – ocular findings, intraocular pressure and Schirmer tear test in ageing cats. *J Feline Med Surg* 2018; 20: 1063–1071.
- 23 Stiles J and Kimmitt B. Eye examination in the cat: step-by-step approach and common findings. *J Feline Med Surg* 2016; 18: 702–711.
- 24 Carter J. Hypertensive ocular disease in cats: a guide to fundic lesions to facilitate early diagnosis. *J Feline Med Surg* 2019; 21: 35–45.
- 25 Norsworthy GD, Adams VJ, Mcelhaney MR, et al. Relationship between semi-quantitative thyroid palpation and total thyroxine concentration in cats with and without hyperthyroidism. *J Feline Med Surg* 2002; 4: 139–143.
- 26 Paepe D, Smets P, van Hoek I, et al. Within- and between-examiner agreement for two thyroid palpation techniques in healthy and hyperthyroid cats. *J Feline Med Surg* 2008; 10: 558–565.
- 27 Boretti FS, Sieber-Ruckstuhl NS, Gerber B, et al. Thyroid enlargement and its relationship to clinicopathological parameters and T4 status in suspected hyperthyroid cats. *J Feline Med Surg* 2009; 11: 286–292.
- 28 Little S, Levy J, Hartmann K, et al. 2020 AAFP feline retrovirus testing and management guidelines. *J Feline Med Surg* 2020; 22: 5–30.
- 29 Bennett D, Zainal Ariffin SM bt and Johnston P. Osteoarthritis in the cat: 1. How common is it and how easy to recognise? *J Feline Med Surg* 2012; 14: 65–75.
- 30 Kranenburg HC, Meij BP, van Hofwegen EML, et al. Prevalence of spondylosis deformans in the feline spine and correlation with owner-perceived behavioural changes. *Vet Comp Orthop Traumatol* 2012; 25: 217–223.
- 31 Slingerland LI, Hazewinkel HAW, Meij BP, et al. Cross-sectional study of the prevalence and clinical features of osteoarthritis in 100 cats. *Vet J* 2011; 187: 304–309.
- 32 Little S (ed). *The cat: clinical medicine and management*. St Louis, MO: Elsevier Saunders, 2012.
- 33 Whitlock EL and Whittington RA. The frailty syndrome: anesthesiologists must understand more and fear less. *Anesth Analg* 2020; 130: 1445–1448.
- 34 Fried LP, Tangen CM, Walston J, et al. Frailty in older adults: evidence for a phenotype. *J Gerontol A Biol Sci Med Sci* 2001; 56: M146–156.
- 35 Mitnitski AB, Mogilner AJ and Rockwood K. Accumulation of deficits as a proxy measure of aging. *Sci World J* 2001; 1: 323–336.
- 36 Scarlett JM, Donoghue S, Saidla J, et al. Overweight cats: prevalence and risk factors. *Int J Obes Relat Metab Disord* 1994; 18 Suppl 1: S22–28.
- 37 Harper EJ. Changing perspectives on aging and energy requirements: aging, body weight and body composition in humans, dogs and cats. *J Nutr* 1998; 128 Suppl 12: 27S–31S.
- 38 Teng KT, McGreevy PD, Toribio JL, et al. Strong associations of nine-point body condition scoring with survival and lifespan in cats. *J Feline Med Surg* 2018; 20: 1110–1118.
- 39 Laflamme DP and Ballam JM. Effect of age on maintenance energy requirements of adult cats. *Compend Contin Educ Pract Vet* 2002; 24: 82.
- 40 Cupp C, Perez-Camargo G, Patil A, et al. Long-term food consumption and body weight changes in a controlled population of geriatric cats. *Compend Contin Educ Small Anim Pract* 2004; 26: 60.
- 41 Bellows J, Center S, Daristotle L, et al. Evaluating aging in cats: how to determine what is healthy and what is disease. *J Feline Med Surg* 2016; 18: 551–570.

- 42 Rollins AW and Murphy M. Nutritional assessment in the cat: practical recommendations for better medical care. *J Feline Med Surg* 2019; 21: 442–448.
- 43 Taylor EJ, Adams C and Neville R. Some nutritional aspects of ageing in dogs and cats. *Proc Nutr Soc* 1995; 54: 645–656.
- 44 Freiche V, Deswarte G, Soulard Y, et al. A psyllium-enriched dry extruded diet improves recurrent feline constipation [abstract]. *J Vet Intern Med* 2010; 24: 1547.
- 45 Tam FM, Carr AP and Myers SL. Safety and palatability of polyethylene glycol 3350 as an oral laxative in cats. *J Feline Med Surg* 2011; 13: 694–697.
- 46 Stone AES, Brummet GO, Carozza EM, et al. 2020 AAHA/AAFP feline vaccination guidelines. *J Feline Med Surg* 2020; 22: 813–830.
- 47 Clarke DE and Caiafa A. Oral examination in the cat: a systematic approach. *J Feline Med Surg* 2014; 16: 873–886.
- 48 Whyte A, Gracia A, Bonastre C, et al. Oral disease and microbiota in free-roaming cats. *Top Companion Anim Med* 2017; 32: 91–95.
- 49 Ingham KE, Gorrel C, Blackburn J, et al. Prevalence of odontoclastic resorptive lesions in a population of clinically healthy cats. *J Small Anim Pract* 2001; 42: 439–443.
- 50 Whyte A, Lacasta S, Whyte J, et al. Tooth resorption in Spanish domestic cats: preliminary data. *Top Companion Anim Med* 2020; 38. DOI: 10.1016/j.tcam.2019.100369.
- 51 Niemiec B, Gawor J, Nemec A, et al. World Small Animal Veterinary Association global dental guidelines. *J Small Anim Pract* 2020; 61: 395–403.
- 52 Brodbelt DC, Pfeiffer DU, Young LE, et al. Risk factors for anaesthetic-related death in cats: results from the confidential enquiry into perioperative small animal fatalities (CEPSAF). *Br J Anaesth* 2007; 99: 617–623.
- 53 Robertson SA, Gogolski SM, Pascoe P, et al. AAFP feline anesthesia guidelines. *J Feline Med Surg* 2018; 20: 602–634.
- 54 Carney HC, Little S, Brownlee-Tomasso D, et al. AAFP and ISFM feline-friendly nursing care guidelines. *J Feline Med Surg* 2012; 14: 337–349.
- 55 Davis H, Jensen T, Johnson A, et al. 2013 AAHA/AAFP fluid therapy guidelines for dogs and cats. *J Am Anim Hosp Assoc* 2013; 49: 149–159.
- 56 Alvis BD and Hughes CG. Physiology considerations in geriatric patients. *Anesthesiol Clin* 2015; 33: 447–456.
- 57 Blatteis CM. Age-dependent changes in temperature regulation – a mini review. *Gerontology* 2012; 58: 289–295.
- 58 Sparkes AH, Caney S, Chalhoub S, et al. ISFM consensus guidelines on the diagnosis and management of feline chronic kidney disease. *J Feline Med Surg* 2016; 18: 219–239.
- 59 International Renal Interest Society. IRIS staging of CKD. [http://www.iris-kidney.com/pdf/IRIS\\_Staging\\_of\\_CKD\\_modified\\_2019.pdf](http://www.iris-kidney.com/pdf/IRIS_Staging_of_CKD_modified_2019.pdf) (2019, accessed February 6, 2020).
- 60 Quimby JM and Lunn KF. Mirtazapine as an appetite stimulant and anti-emetic in cats with chronic kidney disease: a masked placebo-controlled crossover clinical trial. *Vet J* 2013; 197: 651–655.
- 61 Ross SJ, Osborne CA, Kirk CA, et al. Clinical evaluation of dietary modification for treatment of spontaneous chronic kidney disease in cats. *J Am Vet Med Assoc* 2006; 229: 949–957.
- 62 King JN, Tasker S, Gunn-Moore DA, et al. Prognostic factors in cats with chronic kidney disease. *J Vet Intern Med* 2007; 21: 906–916.



- 63 Chakrabarti S, Syme HM and Elliott J. Clinicopathological variables predicting progression of azotemia in cats with chronic kidney disease. *J Vet Intern Med* 2012; 26: 275–281.
- 64 Syme HM, Markwell PJ, Pfeiffer D, et al. Survival of cats with naturally occurring chronic renal failure is related to severity of proteinuria. *J Vet Intern Med* 2006; 20: 528–535.
- 65 Mayer-Roenne B, Goldstein RE and Erb HN. Urinary tract infections in cats with hyperthyroidism, diabetes mellitus and chronic kidney disease. *J Feline Med Surg* 2007; 9: 124–132.
- 66 Dorsch R, Teichmann-Knorrn S and Sjetne Lund H. Urinary tract infection and subclinical bacteriuria in cats: a clinical update. *J Feline Med Surg* 2019; 21: 1023–1038.
- 67 Quimby JM, Gustafson DL and Lunn KF. The pharmacokinetics of mirtazapine in cats with chronic kidney disease and in age-matched control cats. *J Vet Intern Med* 2011; 25: 985–989.
- 68 Quimby JM, Lorbach S, Saffire A, et al. Pharmacokinetics of gabapentin in cats with chronic kidney disease [abstract]. *J Vet Intern Med* 2020; 34: 2825–2826.
- 69 Peterson ME. Hyperthyroidism in cats: what's causing this epidemic of thyroid disease and can we prevent it? *J Feline Med Surg* 2012; 14: 804–818.
- 70 Carney HC, Ward CR, Bailey SJ, et al. 2016 AAFP guidelines for the management of feline hyperthyroidism. *J Feline Med Surg* 2016; 18: 400–416.
- 71 Samaha G, Beatty J, Wade CM, et al. The Burmese cat as a genetic model of type 2 diabetes in humans. *Anim Genet* 2019; 50: 319–325.
- 72 Rand J. Feline diabetes mellitus. In: Mooney CT and Peterson ME (eds). *BSAVA manual of canine and feline endocrinology*. Gloucester: British Small Animal Veterinary Association, 2012, pp 133–147.
- 73 Gostelow R, Forcada Y, Graves T, et al. Systematic review of feline diabetic remission: separating fact from opinion. *Vet J* 2014; 202: 208–221.
- 74 Roomp K and Rand J. Intensive blood glucose control is safe and effective in diabetic cats using home monitoring and treatment with glargine. *J Feline Med Surg* 2009; 11: 668–682.
- 75 Cook A. Diabetes mellitus: why cats are different. <https://www.youtube.com/watch?v=-qSfYCKdaeY?> (2020, accessed month day, year).
- 76 Forcada Y, German AJ, Noble PJM, et al. Determination of serum fPLI concentrations in cats with diabetes mellitus. *J Feline Med Surg* 2008; 10: 480–487.
- 77 Reusch CE, Kley S and Casella M. Home monitoring of the diabetic cat. *J Feline Med Surg* 2006; 8: 119–127.
- 78 Casella M, Hässig M and Reusch CE. Home-monitoring of blood glucose in cats with diabetes mellitus: evaluation over a 4-month period. *J Feline Med Surg* 2005; 7: 163–171.
- 79 Alt N, Kley S, Haessig M, et al. Day-to-day variability of blood glucose concentration curves at home in cats with diabetes mellitus. *J Am Vet Med Assoc* 2007; 230: 1011–1017.
- 80 Sparkes AH, Cannon M, Church D, et al. ISFM consensus guidelines on the practical management of diabetes mellitus in cats. *J Feline Med Surg* 2015; 17: 235–250.
- 81 AAFP. 2019 Diabetes educational toolkit. Available at: [catvets.com/diabetes](http://catvets.com/diabetes).
- 82 Perry R and Tutt C. Periodontal disease in cats: back to basics – with an eye on the future. *J Feline Med Surg* 2015; 17: 45–65.
- 83 Watanabe R, Doodnaught GM, Evangelista MC, et al. Inter-rater reliability of the Feline Grimace Scale in cats undergoing dental extractions. *Front Vet Sci* 2020; 7: 302. DOI: 10.3389/fvets.2020.00302.

- 84 Bellows J, Center S, Daristotle L, et al. Aging in cats: common physical and functional changes. *J Feline Med Surg* 2016; 18: 533–550.
- 85 Benjamin SE and Drobatz KJ. Retrospective evaluation of risk factors and treatment outcome predictors in cats presenting to the emergency room for constipation. *J Feline Med Surg* 2020; 22: 153–160.
- 86 de Brito Galvão JF, Parker V, Schenck PA, et al. Update on feline ionized hypercalcemia. *Vet Clin North Am Small Anim Pract* 2017; 47: 273–292.
- 87 Williams JM, Panciera DL, Larson MM, et al. Ultrasonographic findings of the pancreas in cats with elevated serum pancreatic lipase immunoreactivity. *J Vet Intern Med* 2013; 27: 913–918.
- 88 Graf R, Grüntzig K, Boo G, et al. Swiss Feline Cancer Registry 1965–2008: the influence of sex, breed and age on tumour types and tumour locations. *J Comp Pathol* 2016; 154: 195–210.
- 89 Ho NT, Smith KC and Dobromylskyj MJ. Retrospective study of more than 9000 feline cutaneous tumours in the UK: 2006–2013. *J Feline Med Surg* 2018; 20: 128–134.
- 90 Monteiro BP and Steagall PV. Chronic pain in cats: recent advances in clinical assessment. *J Feline Med Surg* 2019; 21: 601–614.
- 91 Lascelles BDX, Henry JB, Brown J, et al. Cross-sectional study of the prevalence of radiographic degenerative joint disease in domesticated cats. *Vet Surg* 2010; 39: 535–544.
- 92 Godfrey D and Vaughan L. Historical prevalence of radiological appendicular osteoarthritis in cats (1972–1973). *J Am Anim Hosp Assoc* 2018; 54: 209–212.
- 93 Adrian D, Papich M, Baynes R, et al. Chronic maladaptive pain in cats: a review of current and future drug treatment options. *Vet J* 2017; 230: 52–61.
- 94 Benito J, DePuy V, Hardie E, et al. Reliability and discriminatory testing of a client-based metrology instrument, feline musculoskeletal pain index (FMPI) for the evaluation of degenerative joint disease-associated pain in cats. *Vet J* 2013; 196: 368–373.
- 95 Benito J, Hansen B, Depuy V, et al. Feline musculoskeletal pain index: responsiveness and testing of criterion validity. *J Vet Intern Med* 2013; 27: 474–482.
- 96 Gruen ME, Griffith EH, Thomson AE, et al. Criterion validation testing of clinical metrology instruments for measuring degenerative joint disease associated mobility impairment in cats. *PLoS One* 2015; 10. DOI: 10.1371/journal.pone.0131839.
- 97 Enomoto M, Lascelles BDX and Gruen ME. Development of a checklist for the detection of degenerative joint disease-associated pain in cats. *J Feline Med Surg* 2020; 22: 1137–1147.
- 98 Gruen ME, Griffith E, Thomson A, et al. Detection of clinically relevant pain relief in cats with degenerative joint disease associated pain. *J Vet Intern Med* 2014; 28: 346–350.
- 99 Guedes AGP, Meadows JM, Pypendop BH, et al. Assessment of the effects of gabapentin on activity levels and owner-perceived mobility impairment and quality of life in osteoarthritic geriatric cats. *J Am Vet Med Assoc* 2018; 253: 579–585.
- 100 Monteiro BP, Klinck MP, Moreau M, et al. Analgesic efficacy of tramadol in cats with naturally occurring osteoarthritis. *PLoS One* 2017; 12. DOI: 10.1371/journal.pone.0175565.
- 101 Guedes AGP, Meadows JM, Pypendop BH, et al. Evaluation of tramadol for treatment of osteoarthritis in geriatric cats. *J Am Vet Med Assoc* 2018; 252: 565–571.
- 102 Marino CL, Lascelles BDX, Vaden SL, et al. Prevalence and classification of chronic kidney disease in cats randomly selected from four age groups and in cats recruited for degenerative joint disease studies. *J Feline Med Surg* 2014; 16: 465–472.

- 103 Gowan RA, Lingard AE, Johnston L, et al. Retrospective case-control study of the effects of long-term dosing with meloxicam on renal function in aged cats with degenerative joint disease. *J Feline Med Surg* 2011; 13: 752–761.
- 104 Gowan RA, Baral RM, Lingard AE, et al. A retrospective analysis of the effects of meloxicam on the longevity of aged cats with and without overt chronic kidney disease. *J Feline Med Surg* 2012; 14: 876–881.
- 105 King JN, King S, Budsberg SC, et al. Clinical safety of robenacoxib in feline osteoarthritis: results of a randomized, blinded, placebo-controlled clinical trial. *J Feline Med Surg* 2016; 18: 632–642.
- 106 KuKanich K, George C, Roush JK, et al. Effects of low-dose meloxicam in cats with chronic kidney disease. *J Feline Med Surg* 2021; 23: 138–148.
- 107 Gruen ME, Thomson AE, Griffith EH, et al. A feline-specific anti-nerve growth factor antibody improves mobility in cats with degenerative joint disease-associated pain: a pilot proof of concept study. *J Vet Intern Med* 2016; 30: 1138–1148.
- 108 Lanz OI. Lumbosacral and pelvic injuries. *Vet Clin North Am Small Anim Pract* 2002; 32: 949–962.
- 109 Might KR and Gregory CR. Tenesmus and obstipation in a cat. *Compend Contin Educ Vet* 2010; 32: E1–3.
- 110 Sordo L, Breheny C, Halls V, et al. Prevalence of disease and age-related behavioural changes in cats: past and present. *Vet Sci* 2020; 7: 85. DOI: 10.3390/vetsci7030085.
- 111 Landsberg G. Behavior problems of older cats. In: Schaumburg I (ed). *Proceedings of the 135th Annual Meeting of the American Veterinary Medical Association*. San Diego, CA, 1998, pp 317–320.
- 112 Gunn-Moore D, Moffat K, Christie L-A, et al. Cognitive dysfunction and the neurobiology of ageing in cats. *J Small Anim Pract* 2007; 48: 546–553.
- 113 Moffat K and Landsberg G. An investigation of the prevalence of clinical signs of cognitive dysfunction syndrome (CDS) in cats [abstract]. *J Am Anim Hosp Assoc* 2003; 39: 512.
- 114 Bennett D and Morton C. A study of owner observed behavioural and lifestyle changes in cats with musculoskeletal disease before and after analgesic therapy. *J Feline Med Surg* 2009; 11: 997–1004.
- 115 Gunn-Moore D. Cognitive dysfunction in the cat. In: Little SE (ed). *August's consultations in feline internal medicine*. St Louis, MO: Saunders Elsevier, 2016, pp 977–985.
- 116 Haupt K, Levine E, Landsberg G, et al. Anti-oxidant fortified food improves owner perceived behavior in the aging cat. *Proceedings of the ESFM Feline Conference*; 2007; Prague, Czech Republic.
- 117 Pan Y, Araujo JA, Burrows J, et al. Cognitive enhancement in middle-aged and old cats with dietary supplementation with a nutrient blend containing fish oil, B vitamins, antioxidants and arginine. *Br J Nutr* 2013; 110: 40–49.
- 118 Araujo JA, Faubert ML, Brooks ML, et al. NOVIFIT (NoviSAmE) tablets improve executive function in aged dog and cats: implications for treatment of cognitive dysfunction syndrome. *Intern J Appl Res Vet Med* 2012; 10: 90–98.
- 119 Griffith CA, Steigerwald ES and Buffington CAT. Effects of a synthetic facial pheromone on behavior of cats. *J Am Vet Med Assoc* 2000; 217: 1154–1156.
- 120 Landsberg G. Therapeutic options for cognitive decline in senior pets. *J Am Anim Hosp Assoc* 2006; 42: 407–413.
- 121 Gunn-Moore DA. Geriatric cats and cognitive dysfunction syndrome. In: *Proceedings of the WSAVA Annual Congress*, Dublin, Ireland, 2008.
- 122 Puig J, Cattin I and Seth M. Concurrent diseases in hyperthyroid cats undergoing assessment prior to radioiodine treatment. *J Feline Med Surg* 2015; 17: 537–542.

- 123 Scherk M. Why are comorbidities the 'new' norm for cats? In: Proceedings of the American Association of Feline Practitioners 2019 Conference. San Francisco, CA, 2019, pp 71–76. Available at [catvets.com/senior-care](http://catvets.com/senior-care) (2019).
- 124 López-Otín C, Blasco MA, Partridge L, et al. The hallmarks of aging. *Cell* 2013; 153: 1194–1217.
- 125 Fulop T, Larbi A, Dupuis G, et al. Immunosenescence and inflamm-aging as two sides of the same coin: friends or foes? *Front Immunol* 2018; 8. DOI: 10.3389/fimmu.2017. 01960.
- 126 Belanger MC. Concurrent disease management: heart failure and chronic kidney disease. In: Little S (ed). *The cat: clinical medicine and management*. St Louis, MO: Saunders, 2012, p 1108.
- 127 Trevejo RT, Lefebvre SL, Yang M, et al. Survival analysis to evaluate associations between periodontal disease and the risk of development of chronic azotemic kidney disease in cats evaluated at primary care veterinary hospitals. *J Am Vet Med Assoc* 2018; 252: 710–720.
- 128 Finch NC, Syme HM and Elliott J. Risk factors for development of chronic kidney disease in cats. *J Vet Intern Med* 2016; 30: 602–610.
- 129 Hoenig M. Concurrent disease management: hyperthyroidism and diabetes mellitus. In: Little S (ed). *The cat: clinical medicine and management*. St Louis, MO: Saunders, 2012, p 1101.
- 130 Hoenig M. Concurrent disease management: diabetes mellitus and obesity. In: Little S (ed). *The cat: clinical medicine and management*. St Louis, MO: Saunders, 2012, p 110.
- 131 Pérez-López L, Boronat M, Melián C, et al. Assessment of the association between diabetes mellitus and chronic kidney disease in adult cats. *J Vet Intern Med* 2019; 33: 1921–1925.
- 132 Cook AK and Evans JB. Feline comorbidities: recognition, diagnosis and management of the cushingoid diabetic. *J Feline Med Surg* 2021; 23: 4–16.
- 133 Greco D. Concurrent disease management: diabetes mellitus and feline lower urinary tract disorders. In: Little S (ed). *The cat: clinical medicine and management*. St Louis MO: Saunders, 2012, p 1106.
- 134 Tarkosova D, Story MM, Rand JS, et al. Feline obesity – prevalence, risk factors, pathogenesis, associated conditions and assessment: a review. *Veterinarni Medicina* 2016; 61: 295–307.
- 135 Simpson KW. Pancreatitis and triaditis in cats: causes and treatment. *J Small Anim Pract* 2015; 56: 40–49.
- 136 Cerna P, Kilpatrick S and Gunn-Moore DA. Feline comorbidities: what do we really know about feline triaditis? *J Feline Med Surg* 2020; 22: 1047–1067.
- 137 Greene JP, Lefebvre SL, Wang M, et al. Risk factors associated with the development of chronic kidney disease in cats evaluated at primary care veterinary hospitals. *J Am Vet Med Assoc* 2014; 244: 320–327.
- 138 Saito E and Kleinhenz S. Comorbidities in underweight cats. *Vet Focus* 2017; 27.
- 139 Campigotto AJ, Poljak Z, Stone EA, et al. Investigation of relationships between body weight and age among domestic cats stratified by breed and sex. *J Am Vet Med Assoc* 2019; 255: 205–212.
- 140 Fotin M, Lapointe L, Hudon C, et al. Multimorbidity and quality of life in primary care: a systematic review. *Health Qual Life Outcomes* 2004; 2: 51. DOI: 10.1186/1477-7525-2-51.
- 141 Kukanich B. Geriatric veterinary pharmacology. *Vet Clin North Am Small Anim Pract* 2012; 42: 631–642.
- 142 Mansfield CS and Jones BR. Review of feline pancreatitis part two: clinical signs, diagnosis and treatment. *J Feline Med Surg* 2001; 3: 125–132.
- 143 Xenoulis PG, Suchodolski JS and Steiner JM. Chronic pancreatitis in dogs and cats. *Compend Contin Educ Vet* 2008; 30: 166–181.

- 144 Peterson ME and Gamble DA. Effect of nonthyroidal illness on serum thyroxine concentrations in cats: 494 cases (1988). *J Am Vet Med Assoc* 1990; 197: 1203–1208.
- 145 Wakeling J, Moore K, Elliott J, et al. Diagnosis of hyperthyroidism in cats with mild chronic kidney disease. *J Small Anim Pract* 2008; 49: 287–294.
- 146 Barnoski J, Lee-Fowler TM, Boothe DM, et al. Serum theophylline after multiple dosing with transdermal gels in cats. *J Feline Med Surg* 2019; 21: 329–334.
- 147 Eichstadt LR. Compounding transdermal medication for feline patients. *Int J Pharm Compd* 2016; 20: 271–274.
- 148 Naugle KM, Fillingim RB and Riley JL. A meta-analytic review of the hypoalgesic effects of exercise. *J Pain* 2012; 13: 1139–1150.
- 149 Whitehead K, Cortes Y and Eirmann L. Gastrointestinal dysmotility disorders in critically ill dogs and cats. *J Vet Emerg Crit Care* 2016; 26: 234–254.
- 150 Batchelor CEM and McKeegan DEF. Survey of the frequency and perceived stressfulness of ethical dilemmas encountered in UK veterinary practice. *Vet Rec* 2012; 170: 19. DOI: 10.1136/vr.100262.
- 151 Tatlock S, Gober M, Williamson N, et al. Development and preliminary psychometric evaluation of an owner-completed measure of feline quality of life. *Vet J* 2017; 228: 22–32.
- 152 FDA. Patient-reported outcome measures: use in medical product development to support labeling claims: guidance for industry. US Food & Drug Administration. <https://www.fda.gov/regulatory-information/search-fda-guidance-documents/patient-reported-outcome-measures-use-medical-product-development-support-labeling-claims> (2009, accessed September 19, 2020).
- 153 Spofford N, Lefebvre SL, McCune S, et al. Should the veterinary profession invest in developing methods to assess quality of life in healthy dogs and cats? *J Am Vet Med Assoc* 2013; 243: 952–956.
- 154 Noble CE, Wiseman-Orr LM, Scott ME, et al. Development, initial validation and reliability testing of a web-based, generic feline health-related quality-of-life instrument. *J Feline Med Surg* 2019; 21: 84–94.
- 155 Rioja-Lang F, Bacon H, Connor M, et al. Determining priority welfare issues for cats in the United Kingdom using expert consensus. *Vet Rec Open* 2019; 6. DOI: 10.1136/vetreco-2019-000365.
- 156 Meyer RE and Robertson SA. Surveys and objectifying the subjective. *Vet Anaes Analg* 2016; 43: 358–360.
- 157 Yeates J and Main D. Assessment of companion animal quality of life in veterinary practice and research. *J Small Anim Pract* 2009; 50: 274–281.
- 158 Scott EM, Nolan A, Reid J, et al. Can we really measure animal quality of life? Methodologies for measuring quality of life in people and other animals. *Anim Welf* 2007; 16: 16–24.
- 159 Bishop G, Cooney K, Cox S, et al. 2016 AAHA/IAAHPC end-of-life care guidelines. *J Am Anim Hosp Assoc* 2016; 52: 341–356.
- 160 Noli C, Borio S, Varina A, et al. Development and validation of a questionnaire to evaluate the Quality of Life of cats with skin disease and their owners, and its use in 185 cats with skin disease. *Vet Dermatol* 2016; 27: 247–e58.
- 161 Goldberg KJ. Goals of care: development and use of the serious veterinary illness conversation guide. *Vet Clin North Am Small Anim Pract* 2019; 49: 399–415.
- 162 Grimm H, Bergadano A, Musk GC, et al. Drawing the line in clinical treatment of companion animals: recommendations from an ethics working party. *Vet Rec* 2018; 182: 664. DOI: 10.1136/vr.104559.
- 163 Cox S. Anticipatory grief and preparation for pet loss. In: Gardner M and McVety D (eds). *Treatment and care of the geriatric veterinary patient*. Wiley Blackwell, 2017, pp 311–315.



## Recuadro 2

| Escala de fragilidad fenotípica                                    |                                           |    |    |
|--------------------------------------------------------------------|-------------------------------------------|----|----|
|                                                                    | Condiciones / problemas médicos presentes | Sí | No |
| 1.                                                                 | Pérdida de peso involuntaria              |    |    |
| 2.                                                                 | Debilidad                                 |    |    |
| 3.                                                                 | Poca resistencia, agotamiento temprano    |    |    |
| 4.                                                                 | Lentitud y poca actividad                 |    |    |
| <b>Pre-frágil:</b> 'Sí' a 2 de 4. <b>Frágil:</b> 'Sí' a 3 o 4 de 4 |                                           |    |    |

Adaptado de Fried et al<sup>34</sup>

| Escala de índice de fragilidad                                     |                                               |    |    |
|--------------------------------------------------------------------|-----------------------------------------------|----|----|
|                                                                    | Condiciones / problemas médicos presentes     | Sí | No |
| 1.                                                                 | Déficits fisiológicos                         |    |    |
| 2.                                                                 | Déficits psicológicos (emocionales)           |    |    |
| 3.                                                                 | Déficits cognitivos (orientados a las tareas) |    |    |
| 4.                                                                 | Déficits en la función social                 |    |    |
| <b>Pre-frágil:</b> 'Sí' a 2 de 4. <b>Frágil:</b> 'Sí' a 3 o 4 de 4 |                                               |    |    |

Adaptado de Mitnitski et al<sup>35</sup>

**Tabla 1: Diagnósticos recomendados para gatos mayores**

| Pruebas de laboratorio de referencia                                                                                                                                                                                                                                                                                                                                                                                                                                              | Pruebas auxiliares *                                                                                                                                                                                                                                                 |
|-----------------------------------------------------------------------------------------------------------------------------------------------------------------------------------------------------------------------------------------------------------------------------------------------------------------------------------------------------------------------------------------------------------------------------------------------------------------------------------|----------------------------------------------------------------------------------------------------------------------------------------------------------------------------------------------------------------------------------------------------------------------|
| <p><b>Conteo sanguíneo completo:</b> hematocrito, glóbulos rojos, glóbulos blancos, recuento diferencial, plaquetas</p>                                                                                                                                                                                                                                                                                                                                                           | <p>Anticuerpo / antígeno del gusano del corazón</p> <p>Virus de la leucemia felina (FeLV) / virus de la inmunodeficiencia felina ELISA, Provirus FeLV PCR<sup>28</sup></p> <p>Revisión de diapositivas de hematología</p>                                            |
| <p><b>Panel de bioquímica sérica:</b> proteína total, albúmina, globulina, fosfatasa alcalina, alanina aminotransferasa, glucosa, nitrógeno ureico en sangre, creatinina, potasio, fósforo, sodio y calcio como parámetros mínimos</p> <p>Parámetros opcionales que a menudo se incluyen en paneles comerciales habitualmente disponibles: aspartato transaminasa, gamma-glutamyl transferasa, creatina quinasa, bilirrubina total, cloruro, HCO<sub>3</sub> o CO<sub>2</sub></p> | <p>Calcio ionizado / hormona paratiroidea (PTH) / péptido relacionado con la PTH</p> <p>Cobalamina (B12) / folato</p> <p>Lipasa felina específica del páncreas</p> <p>Fructosamina</p> <p>NT-pro BNP</p> <p>SDMA</p> <p>Inmunorreactividad similar a la tripsina</p> |
| <p><b>Análisis de orina:</b> gravedad específica, sedimento, glucosa, cetonas, bilirrubina, proteínas, pH de la orina</p>                                                                                                                                                                                                                                                                                                                                                         | <p>Cultivo de orina / sensibilidad</p> <p>Cociente de proteína y creatinina</p>                                                                                                                                                                                      |
| <p><b>Nivel de T4 total<sup>†</sup></b></p>                                                                                                                                                                                                                                                                                                                                                                                                                                       | <p>Nivel de T4 libre / hormona estimulante de la tiroides</p>                                                                                                                                                                                                        |
| <p><b>Presión sanguínea<sup>†</sup></b></p>                                                                                                                                                                                                                                                                                                                                                                                                                                       |                                                                                                                                                                                                                                                                      |
|                                                                                                                                                                                                                                                                                                                                                                                                                                                                                   | <p>Análisis fecal (centrifugación)</p>                                                                                                                                                                                                                               |
|                                                                                                                                                                                                                                                                                                                                                                                                                                                                                   | <p>Ecocardiograma</p> <p>Electrocardiograma</p> <p>Radiografía</p> <p>Ultrasonido</p>                                                                                                                                                                                |
| <p>* Puede estar indicado por el estado de salud del paciente y / o los resultados de las pruebas iniciales</p> <p><sup>†</sup>Ver discusión en el texto</p>                                                                                                                                                                                                                                                                                                                      |                                                                                                                                                                                                                                                                      |



**Tabla 2: Identificación de los signos sutiles de dolor en el hogar y en la práctica**

|                            |                                            |                                                                                                                                                                                                                                                                                                                                                                                                                                                                                     |
|----------------------------|--------------------------------------------|-------------------------------------------------------------------------------------------------------------------------------------------------------------------------------------------------------------------------------------------------------------------------------------------------------------------------------------------------------------------------------------------------------------------------------------------------------------------------------------|
| En el hogar                | Patrones de comportamiento                 | <ul style="list-style-type: none"> <li>● Cambios en las interacciones con la familia, los visitantes y otras mascotas de la familia</li> <li>● Disminución del apetito y de la ingesta de alimentos</li> <li>● Disminuye el juego</li> <li>● Crecimiento excesivo de uñas que indica una disminución de los comportamientos de rascado</li> <li>● Cambios en las rutinas normales</li> </ul>                                                                                        |
|                            | Movilidad                                  | <ul style="list-style-type: none"> <li>● Cambio en los espacios normales de descanso</li> <li>● Aumento del sueño</li> <li>● Disminución de saltos</li> <li>● Dificultad para subir escaleras, utilizar superficies intermedias para llegar a superficies más altas o no ir a superficies más altas en absoluto</li> <li>● Deslizarse por el borde de las superficies para disminuir la altura de salto hacia abajo</li> <li>● Suelo de la casa</li> <li>● Cojera (rara)</li> </ul> |
|                            | Respuesta al tacto                         | <ul style="list-style-type: none"> <li>● Cambios en las preferencias de caricias</li> <li>● Disgusto repentino por el cuidado del aseo personal, quizás solo en un lugar físico específico</li> <li>● Aversión repentina a ser cargado</li> </ul>                                                                                                                                                                                                                                   |
| En la práctica veterinaria | Personalidad                               | <ul style="list-style-type: none"> <li>● Cambio de comportamiento: menos o más accesible</li> <li>● Escondiéndose en el portador para gatos cuando antes salió voluntariamente</li> </ul>                                                                                                                                                                                                                                                                                           |
|                            | Movilidad                                  | <ul style="list-style-type: none"> <li>● Modo de andar alterado</li> <li>● Cambios al saltar (ya no saltar a la mesa de examen, dificultad para llegar al examen, etc.)</li> <li>● Cambios en conductas exploratorias</li> </ul>                                                                                                                                                                                                                                                    |
|                            | Apariencia                                 | <ul style="list-style-type: none"> <li>● Evidencia de atrofia muscular</li> <li>● Evidencia de aumento o disminución del aseo (alopecia, esteras, pelaje opaco)</li> <li>● Crecimiento excesivo de uñas</li> </ul>                                                                                                                                                                                                                                                                  |
|                            | Respuesta al tacto                         | <ul style="list-style-type: none"> <li>● Objeta las caricias o toques del examen</li> </ul>                                                                                                                                                                                                                                                                                                                                                                                         |
|                            | Capacidad para obtener muestras biológicas | <ul style="list-style-type: none"> <li>● Resistente a la manipulación para muestras de sangre u orina</li> <li>● Cambios en el comportamiento en comparación con antes (Ej., Ya no se siente cómodo para la extracción de sangre de las patas traseras)</li> </ul>                                                                                                                                                                                                                  |

**Tabla 3: Mitos frente a hechos relacionados con el tratamiento y manejo del hipertiroidismo felino (HT)**

| Mito                                                                                                                                                                                 | Hecho o realidad                                                                                                                                                                                                                                                     |
|--------------------------------------------------------------------------------------------------------------------------------------------------------------------------------------|----------------------------------------------------------------------------------------------------------------------------------------------------------------------------------------------------------------------------------------------------------------------|
| El tratamiento de HT causa enfermedad renal                                                                                                                                          | El exceso de T4 aumenta la tasa de filtración glomerular (TFG). El tratamiento eficaz de HT disminuye la TFG, desenmascarando la ERC preexistente                                                                                                                    |
| Los gatos con niveles de creatinina dentro de los intervalos de referencia no tienen ERC                                                                                             | El aumento de la tasa de filtración glomerular y la pérdida de masa muscular asociada con la HT provocan una disminución de la creatinina incluso si un gato tiene ERC                                                                                               |
| Mantener el nivel de T4 ligeramente por encima de los intervalos de referencia ayudará a los pacientes con ERC                                                                       | Incluso las elevaciones en los niveles de T4 pueden causar o exacerbar el daño glomerular                                                                                                                                                                            |
| El nivel de T4 posterior al tratamiento por debajo del intervalo de referencia no daña a los gatos. El paciente no es hipotiroideo mientras la T4 esté en el intervalo de referencia | El hipotiroidismo iatrogénico puede provocar la progresión de la ERC y acortar el largo de vida. Los gatos pueden desarrollar hipotiroidismo clínicamente significativo incluso si la T4 se encuentra dentro del intervalo de referencia                             |
| El aislamiento después del tratamiento con yodo radiactivo ( $I^{131}$ ) es demasiado estresante para un gato                                                                        | A pesar de que una semana fuera de casa implica algo de estrés, es mucho mejor que el estrés asociado con la enfermedad en sí, además de medicación constante y análisis de sangre frecuentes.                                                                       |
| $I^{131}$ tiene un costo prohibitivo                                                                                                                                                 | El costo de todas las opciones de tratamiento durante 1 año es esencialmente el mismo. Durante la vida del gato, el costo de $I^{131}$ es significativamente menor que el costo de las complicaciones de la enfermedad, medicamentos de por vida o dietas recetadas. |

**Tabla 4: Ejemplos de estados mentales / emocionales y físicos que contribuyen a una pobre calidad de vida (CV)**

|                         |                                                                                           |
|-------------------------|-------------------------------------------------------------------------------------------|
| <b>MENTAL/EMOCIONAL</b> | Ansiedad                                                                                  |
|                         | Miedo                                                                                     |
|                         | Aislamiento y soledad                                                                     |
|                         | Aburrimiento                                                                              |
|                         | Frustración                                                                               |
|                         | Angustia                                                                                  |
| <b>FISICO</b>           | Dolor crónico (desadaptativo) (p. ej., DJD, enfermedad dental, heridas que no cicatrizan) |
|                         | Náuseas y vómitos (p. ej., Secundario a ERC)                                              |
|                         | Falta de aliento (p. ej., Enfermedad respiratoria, insuficiencia cardíaca congestiva)     |
|                         | Sed (p. ej., DM incontrolada, ERC)                                                        |

**Tabla 5: Cambios ambientales para hacer posible, o más fácil las actividades de la vida diaria para los gatos envejecidos y aquellos con problemas de salud**

| Problema de Salud | Proveer                                                                                                                                                                                                                                                                                                                                                                                  | Resultado                                                                                                                                                                                                                                                                                                                          |
|-------------------|------------------------------------------------------------------------------------------------------------------------------------------------------------------------------------------------------------------------------------------------------------------------------------------------------------------------------------------------------------------------------------------|------------------------------------------------------------------------------------------------------------------------------------------------------------------------------------------------------------------------------------------------------------------------------------------------------------------------------------|
| DJD<br>Sarcopenia | <ul style="list-style-type: none"> <li><input type="checkbox"/> Pasos o rampas para acceder a lugares elevados</li> <li><input type="checkbox"/> Caja de arena de acceso bajo / fácil acceso</li> <li><input type="checkbox"/> Aseo asistido</li> <li><input type="checkbox"/> Envases de comida y agua elevados</li> <li><input type="checkbox"/> Sitios de descanso cálidos</li> </ul> | <ul style="list-style-type: none"> <li>✓ Mantiene el acceso a un lugar seguro</li> <li>✓ Mantiene los hábitos de ir al baño</li> <li>✓ Mantiene la higiene del pelaje</li> <li>✓ Más fácil para alcanzar los recursos esenciales y mantener la ingesta calórica y la hidratación.</li> <li>✓ Mantiene el calor corporal</li> </ul> |
| DM<br>ERC         | <ul style="list-style-type: none"> <li><input type="checkbox"/> Múltiples estaciones para beber de varias configuraciones en diferentes lugares de la casa</li> </ul>                                                                                                                                                                                                                    | <ul style="list-style-type: none"> <li>✓ Proporciona un fácil acceso al agua todo el tiempo.</li> </ul>                                                                                                                                                                                                                            |
| SDC               | <ul style="list-style-type: none"> <li><input type="checkbox"/> En un ambiente estable: no reorganiza los principales recursos del gato (comida, agua, cajas de arena)</li> </ul>                                                                                                                                                                                                        | <ul style="list-style-type: none"> <li>✓ Ayuda al gato a localizar un recurso esencial</li> </ul>                                                                                                                                                                                                                                  |

## Tabla 6: Cuidados mejorados para los gatos de edad avanzada

| Cuidados mejorados                                   | Razon fundamental                                                                        |
|------------------------------------------------------|------------------------------------------------------------------------------------------|
| Potenciadores del sabor<br>Alimentos con olor fuerte | Con la edad, la función sensorial disminuye, incluido el olfato.                         |
| Corte regular de uñas                                | Las uñas son más frágiles y los comportamientos de rascado pueden disminuir debido a DJD |
| Aseo asistido                                        | El aseo personal puede verse inhibido por DJD                                            |

## Pull quotes

|                                                                                                                                                                                                                                                                       |                                                                                                                                                                                                                        |
|-----------------------------------------------------------------------------------------------------------------------------------------------------------------------------------------------------------------------------------------------------------------------|------------------------------------------------------------------------------------------------------------------------------------------------------------------------------------------------------------------------|
| <p>Routine assessment facilitates health maintenance and early detection of disease. It is less costly and more successful than crisis management.</p>                               | <p>La evaluación de rutina facilita el mantenimiento de la salud y la detección temprana de enfermedades. Es menos costoso y más exitoso que el manejo de crisis.</p>                                                  |
| <p>Although healthy aging means different things to different people regarding both themselves and their cats, comfort and enjoyment of life are likely to be common targets.</p>  | <p>Aunque un envejecimiento saludable significa cosas diferentes para diferentes personas con respecto a ellos mismos y a sus gatos, es probable que la comodidad y el disfrute de la vida sean objetivos comunes.</p> |

|                                                                                                                                                                                                                                                                          |                                                                                                                                                                                                                                      |
|--------------------------------------------------------------------------------------------------------------------------------------------------------------------------------------------------------------------------------------------------------------------------|--------------------------------------------------------------------------------------------------------------------------------------------------------------------------------------------------------------------------------------|
| <p>Unexplained trends in body weight, body condition score (BCS) and/or muscle condition score (MCS) are problems that must be investigated and managed as diseases.</p>                | <p>Las tendencias inexplicables en el peso corporal, el puntaje de condición corporal (BCS) y / o el puntaje de condición muscular (MCS) son problemas que deben investigarse y manejarse como enfermedades.</p>                     |
| <p>Biometric data trends provide invaluable information and are more important than a single data point. Look at the whole patient and view trends in context.</p>                                                                                                       | <p>Las tendencias de datos biométricos proporcionan información invaluable y son más importantes que un solo punto de datos. Observar al paciente en su totalidad y observar las tendencias en contexto.</p>                         |
| <p>Pain can be difficult to identify in cats. With proper guidance, clients can learn to detect changes in their cat's normal mobility and behavior patterns indicative of pain.</p>  | <p>El dolor puede ser difícil de identificar en los gatos. Con la orientación adecuada, los clientes pueden aprender a detectar cambios en la movilidad normal y los patrones de comportamiento de su gato indicativos de dolor.</p> |

|                                                                                                                                                                                                                                    |                                                                                                                                                                |
|------------------------------------------------------------------------------------------------------------------------------------------------------------------------------------------------------------------------------------|----------------------------------------------------------------------------------------------------------------------------------------------------------------|
| <p>If adjustments are not made based on age-related physiologic changes, the risk of anesthetic overdose dramatically increases.</p>              | <p>Si no se realizan ajustes en función de los cambios fisiológicos relacionados con la edad, el riesgo de sobredosis de anestésico aumenta drásticamente.</p> |
| <p>Constipation is a common issue affecting older cats. Its etiology is likely multifactorial.</p>                                              | <p>El estreñimiento es un problema común que afecta a los gatos mayores. Su etiología es probablemente multifactorial.</p>                                     |
| <p>There are multiple causes of ongoing pain in senior cats, and the pain experience may escalate when more than one condition is present.</p>  | <p>Existen múltiples causas de dolor continuo en los gatos mayores, y la experiencia del dolor puede intensificarse cuando hay más de una afección.</p>        |



|                                                                                                                                                                                                                                                                                                     |                                                                                                                                                                                                                                                                               |
|-----------------------------------------------------------------------------------------------------------------------------------------------------------------------------------------------------------------------------------------------------------------------------------------------------|-------------------------------------------------------------------------------------------------------------------------------------------------------------------------------------------------------------------------------------------------------------------------------|
| <p>The complex etiology of DJD-related pain demands a multimodal and integrative approach involving pharmacologic and non-pharmacologic therapies, and environmental modification.</p>                             | <p>La compleja etiología del dolor relacionado con la DJD exige un enfoque multimodal e integrador que incluya terapias farmacológicas y no farmacológicas y modificación ambiental.</p>                                                                                      |
| <p>The high frequency of comorbidities as cats age likely relates to a combination of exogenous stress causing oxidative injuries, infectious agent exposure over time, and imbalance of the immune system.</p>  | <p>La alta frecuencia de comorbilidades a medida que los gatos envejecen probablemente se relacione con una combinación de estrés exógeno que causa lesiones oxidativas, exposición a agentes infecciosos a lo largo del tiempo y desequilibrio del sistema inmunológico.</p> |

|                                                                                                                                                                                                                                                         |                                                                                                                                                                                                      |
|---------------------------------------------------------------------------------------------------------------------------------------------------------------------------------------------------------------------------------------------------------|------------------------------------------------------------------------------------------------------------------------------------------------------------------------------------------------------|
| <p>The presence of multiple diseases can be overwhelming for clients, and an important component of the care veterinarians provide includes supporting the owner.</p>  | <p>La presencia de múltiples enfermedades puede ser abrumadora para los clientes, y un componente importante de la atención que brindan los veterinarios incluye el apoyo a los propietarios.</p>    |
| <p>As veterinarians, we must partner with owners to make well-informed patient-centric decisions.</p>                                                                | <p>Como veterinarios, debemos asociarnos con los dueños para tomar decisiones bien informadas centradas en el paciente.</p>                                                                          |
| <p>When the veterinary team shares an understanding of what QOL means, owners are supported with consistent guidance for assessing QOL in their cats.</p>                                                                                               | <p>Cuando el equipo veterinario comparte una comprensión de lo que significa la calidad de vida, los propietarios reciben el apoyo con una orientación constante para evaluar la CVde sus gatos.</p> |
| <p>The Task Force recognizes that cat owners have four budgets that must all be considered when making treatment plans.</p>                                                                                                                             | <p>El grupo de trabajo reconoce que los dueños de gatos tienen cuatro presupuestos que deben tenerse en cuenta al hacer un plan de tratamiento.</p>                                                  |

This publication is intended as a full and faithful translation of the original English language version. The authors, editors, Societies (AAFP and ISFM) and Publisher (SAGE Publications) will not accept any legal responsibility for any errors or omissions that may be made in this translation. The Societies and Publisher make no warranty, express or implied, with respect to the material contained herein and accept no liability for any errors made during translation of the article.

Esta publicación es una traducción completa y fiel de la versión original en idioma inglés. Los autores, correctores, sociedades y editores no aceptarán ninguna responsabilidad legal por cualquier error u omisión que pudiera surgir de la traducción. Las Sociedades (AAFP e ISFM) y el Editor (Sage Publishing) no hacen garantía alguna, expresa o implícita, con respecto al material que se incluye en el presente y no aceptan responsabilidad alguna por cualquier error que pudiera surgir de la traducción de este artículo.

JFMS is the official publication of the American Association of Feline Practitioners (AAFP) and International Society of Feline Medicine (ISFM)

El JFMS es la publicación oficial de la Asociación Estadounidense de Médicos Felinos (AAFP) y la Sociedad Internacional de Medicina Felina (ISFM)

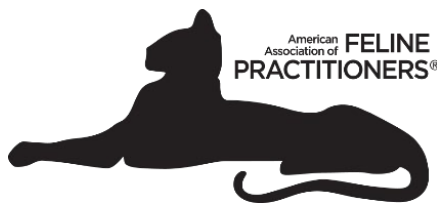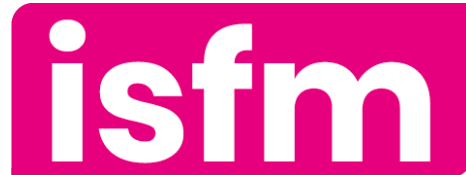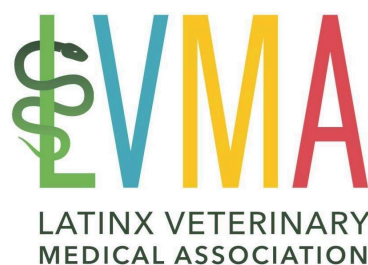

Supplement: sj-pdf-5-jfm-10.1177_1098612X211021538.pdf [file sj-pdf-5-jfm-10.1177_1098612X211021538.pdf]
