# Supplementary material
Source: PubMed Central journal article supplement (PMC10812122)
Supplement: sj-pdf-1-jfm-10.1177_1098612X211021538.pdf [file sj-pdf-1-jfm-10.1177_1098612X211021538.pdf]

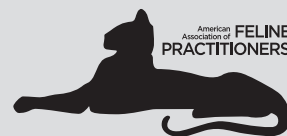

### VALIDATED INSTRUMENTS

QOL instruments have been developed for cats with specific diseases, which include:

- Cardiac disease<sup>1</sup>
- Diabetes Mellitus<sup>2</sup>
- Skin disease<sup>3</sup>

Aging cats rarely have one disease; therefore, validated generic health-related QOL instruments are needed. The CHEW (Cat HEalth and Wellbeing) instrument has not been validated in sick cats,<sup>4</sup> and the CatQoL by Bijsmans and others has only been validated in cats with chronic kidney disease.<sup>5</sup> The article that discusses the development of the CHEW Questionnaire can be found here: <https://journals.sagepub.com/doi/full/10.1177/1098612X16657386>. The CHEW Questionnaire can be found here: [https://journals.sagepub.com/doi/suppl/10.1177/1098612X16657386/suppl\\_file/Supplementary\\_Material\\_Qol\\_Questionnaire\\_FINAL.pdf](https://journals.sagepub.com/doi/suppl/10.1177/1098612X16657386/suppl_file/Supplementary_Material_Qol_Questionnaire_FINAL.pdf).

A 16-item feline QOL scale has shown excellent validity and reliability in healthy cats but requires additional testing before it can be used in clinical practice.<sup>6</sup> A 20-item instrument that is completed online by cat owners has been developed and reliably differentiates sick from healthy cats, and shows promise as an aid for tracking chronic feline diseases.<sup>7</sup> During development, cats with degenerative joint disease, cardiac, dental, renal, lower urinary tract, and chronic gastrointestinal disease were included, in addition to cats with painful and non-painful cancer.<sup>7</sup> The 20 items were allocated to three domains which encompass physical and mental health, which include:

- Vitality
- Comfort
- Emotional wellbeing

This instrument is available for clinical use through NewMetrica ([www.newmetrica.com](http://www.newmetrica.com)) and is fee-based.

### OTHER TOOLS

There are many tools being used that are not validated by rigorous testing, however, this does not mean they should not be used. Engaging cat owners to track their pet is our main goal. Other tools include: The Grey Muzzle App (free for download at <https://apps.apple.com/us/app/grey-muzzle/id1071363012>), Journeys Quality of Life Scale Calculator (<https://journeypet.com/pet-quality-of-life-scale-calculator>), the HHHHHMM Scale created by Dr. Alice Villalobos (<https://vetsocialwork.utk.edu/wp-content/uploads/2016/03/Quality-of-Life.pdf>).

### REFERENCES

1. Freeman LM, Rush JE, Oyama MA, et al. **Development and evaluation of a questionnaire for assessment of health-related quality of life in cats with cardiac disease.** *J Am Vet Med Assoc* 2012; 240: 1188–93.
2. Niessen SJM, Powney S, Guitian J, et al. **Evaluation of a quality-of-life tool for cats with diabetes mellitus.** *J Vet Intern Med* 2010; 24: 1098–105.
3. Noli C, Borio S, Varina A, et al. **Development and validation of a questionnaire to evaluate the quality of life of cats with skin disease and their owners, and its use in 185 cats with skin disease.** *Vet Dermatol* 2016; 27: 247–e58.
4. Freeman LM, Rodenberg C, Narayanan A, et al. **Development and initial validation of the Cat HEalth and Wellbeing (CHEW) Questionnaire: a generic health-related quality of life instrument for cats.** *J Feline Med Surg* 2016; 18: 689–701.
5. Bijsmans ES, Jepson RE, Syme HM, et al. **Psychometric Validation of a general health quality of life tool for cats used to compare healthy cats and cats with chronic kidney disease.** *J Vet Intern Med* 2015; 30: 183–91.
6. Tatlock S, Gober M, Williamson N, et al. **Development and preliminary psychometric evaluation of an owner-completed measure of feline quality of life.** *Vet J* 2017; 228: 22–32.
7. Noble CE, Wiseman-Orr LM, Scott, ME, et al. **Development, initial validation and reliability testing of a web-based, generic feline health-related quality-of-life instrument.** *J Feline Med Surg* 2018; 21: 84–94.

**For more information, visit [www.catvets.com/senior-care](http://www.catvets.com/senior-care).**
