# Supplementary material
Source: PubMed Central journal article supplement (PMC10812122)
Supplement: sj-pdf-4-jfm-10.1177_1098612X211021538.pdf [file sj-pdf-4-jfm-10.1177_1098612X211021538.pdf]

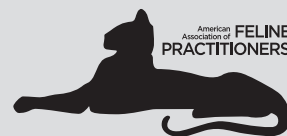

### **GUIDELINES AND TOOLKITS**

#### **AAHA/AAFP Feline Life Stage Guidelines**

[www.catvets.com/life-stage](http://www.catvets.com/life-stage)

#### **AAFP/ISFM Feline Environmental Needs Guidelines**

[www.catvets.com/environmental-guidelines](http://www.catvets.com/environmental-guidelines)

#### **AAFP/ISFM Feline-Friendly Handling Guidelines**

[www.catvets.com/handling](http://www.catvets.com/handling)

#### **AAHA/AAFP Pain Management Guidelines for Dogs and Cats**

[www.catvets.com/pain-management](http://www.catvets.com/pain-management)

#### **AAFP Feline Retrovirus Testing and Management Guidelines**

[www.catvets.com/retroviruses](http://www.catvets.com/retroviruses)

#### **AAHA/AAFP Feline Vaccination Guidelines**

[www.catvets.com/vaccinations](http://www.catvets.com/vaccinations)

#### **AAFP Feline Anesthesia Guidelines**

[www.catvets.com/anesthesia](http://www.catvets.com/anesthesia)

#### **AAFP/ISFM Feline-Friendly Nursing Care Guidelines**

[www.catvets.com/nursing-care](http://www.catvets.com/nursing-care)

#### **ISFM Consensus Guidelines on the Diagnosis and Management of Feline Chronic Kidney Disease**

<https://journals.sagepub.com/doi/pdf/10.1177/1098612x16631234>

#### **AAFP Guidelines for the Management of Feline Hyperthyroidism**

[www.catvets.com/hyperthyroidism](http://www.catvets.com/hyperthyroidism)

#### **ISFM Consensus Guidelines on the Practical Management of Diabetes Mellitus in Cats**

<https://journals.sagepub.com/doi/pdf/10.1177/1098612x15571880>

#### **AAFP Hypertension Educational Toolkit**

[www.catvets.com/hypertension](http://www.catvets.com/hypertension)

#### **ISFM Consensus Guidelines on the Diagnosis and Management of Hypertension in Cats**

<https://journals.sagepub.com/doi/pdf/10.1177/1098612X17693500>

#### **AAFP Diabetes Educational Toolkit**

[www.catvets.com/diabetes-toolkit](http://www.catvets.com/diabetes-toolkit)

#### **AAFP End of Life Educational Toolkit**

[www.catvets.com/endoflife](http://www.catvets.com/endoflife)

#### **AAFP/AAHA Fluid Therapy Guidelines**

[www.catvets.com/fluid-therapy](http://www.catvets.com/fluid-therapy)

**For more information, visit [www.catvets.com/senior-care](http://www.catvets.com/senior-care).**



### OTHER RESOURCES

#### AAFP Blood Pressure Assessment Form

[www.catvets.com/public/images/Toolkit/Hypertension/AAFP\\_Blood\\_Pressure\\_Form.pdf](http://www.catvets.com/public/images/Toolkit/Hypertension/AAFP_Blood_Pressure_Form.pdf)

#### 2020 AAHA/AAFP Feline Vaccination Guidelines Vaccine Calculator

[www.aaha.org/aaha-guidelines/2020-aahaaafp-feline-vaccination-guidelines/feline-vaccine-calculator](http://www.aaha.org/aaha-guidelines/2020-aahaaafp-feline-vaccination-guidelines/feline-vaccine-calculator)

#### Parasite Prevention

- American Heartworm Society  
[www.heartwormsociety.org](http://www.heartwormsociety.org)
- Companion Animal Parasite Council (CAPC)  
[www.capcvet.org](http://www.capcvet.org)

#### Fecal Scoring Charts

- [www.proplanveterinarydiets.ca/wp-content/uploads/2016/04/PPPVD-Fecal-Scoring-Chart-EN-FINAL.pdf](http://www.proplanveterinarydiets.ca/wp-content/uploads/2016/04/PPPVD-Fecal-Scoring-Chart-EN-FINAL.pdf)
- [https://kibblequeen.com/wp-content/uploads/2020/02/Royal-Canin-GI-Fecal-Charts\\_Cat\\_English.pdf](https://kibblequeen.com/wp-content/uploads/2020/02/Royal-Canin-GI-Fecal-Charts_Cat_English.pdf)

#### International Renal Interest Society

[www.iris-kidney.com](http://www.iris-kidney.com)

#### New Science of Feline OA Pain Website

A comprehensive resource for veterinarians and cat owners which contains non-commercial educational content is available at [www.zoetisus.com/oa-pain/feline-oa-pain.aspx](http://www.zoetisus.com/oa-pain/feline-oa-pain.aspx)

#### The Feline Musculoskeletal Pain Index (FMPI)

A clinically validated instrument that can be used to diagnose and monitor chronic pain associated with feline DJD. Information about the FMPI can be found at [www.painfreecat.org](http://www.painfreecat.org). Veterinarians and technicians can request a copy of the questionnaire at [www.cvm.ncsu.edu/research/labs/clinical-sciences/comparative-pain-research/labs-comparative-pain-research-clinical-metrology-instruments-feline-musculoskeletal-pain-index/](http://www.cvm.ncsu.edu/research/labs/clinical-sciences/comparative-pain-research/labs-comparative-pain-research-clinical-metrology-instruments-feline-musculoskeletal-pain-index/)

#### Special JFMS Issue on Feline Comorbidities

A JFMS virtual special issue on feline comorbidities, which discusses the complexities of diagnosis and management, is available at [www.cpsi.jfms.com](http://www.cpsi.jfms.com)

#### Blood Pressure Measurement Videos

Blood pressure measurement videos produced by the ISFM are available at [www.bit.ly/34rMBbA](http://www.bit.ly/34rMBbA)

#### Body and Muscle Scoring

Body and muscle scoring charts are provided on the ISFM website at [www.bit.ly/ISFMMCS](http://www.bit.ly/ISFMMCS).

**For more information, visit [www.catvets.com/senior-care](http://www.catvets.com/senior-care).**
