# Supplementary material
Source: PubMed Central journal article supplement (PMC10812122)
Supplement: sj-pdf-6-jfm-10.1177_1098612X211021538.pdf [file sj-pdf-6-jfm-10.1177_1098612X211021538.pdf]

# 2021 AAFP Diretrizes para Cuidados com Gatos Idosos

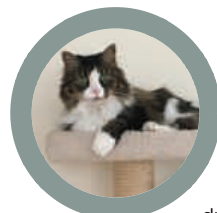

**Resumo:** As '2021 AAFP Feline Senior Care Guidelines' (Diretrizes para Cuidados com Gatos Idosos da AAFP de 2021) são de autoria de uma Força-Tarefa de especialistas em medicina clínica felina e servem como uma atualização e extensão daquelas publicadas em 2009. Elas enfatizam a avaliação individual do paciente e o processo de envelhecimento, com referências a outras diretrizes de medicina felina para uma discussão mais completa de doenças específicas. Focar em cada gato incentiva e capacita o tutor a fazer parte dos cuidados do seu pet felino em todas as etapas do processo. Uma discussão abrangente durante a realização do exame físico e a obtenção do histórico permite adaptar a abordagem tanto para o gato como para a família envolvida nos cuidados desse pet. Vídeos e análises de medições do histórico em série são incluídos na avaliação de cada paciente. Essas Diretrizes apresentam o conceito emergente de fragilidade, com uma descrição e métodos de sua incorporação na avaliação de gatos idosos. É abordado o banco de dados mínimo para o diagnóstico, juntamente com recomendações para considerações investigativas adicionais. Por exemplo, a avaliação da pressão arterial é incluída como um procedimento diagnóstico mínimo tanto em gatos aparentemente saudáveis como nos doentes. Os gatos envelhecem muito mais rápido que os seres humanos; por essa razão, também estão incluídos cronogramas práticos para a frequência dos exames, sugerindo um aumento na frequência de realização dos testes diagnósticos com o avanço da idade. É considerada a importância da nutrição, bem como as necessidades e deficiências nutricionais dos gatos idosos. A dor é destacada como uma síndrome própria, com ênfase dada às considerações de cada gato idoso. A Força-Tarefa aborda a anestesia, juntamente com estratégias para permitir que os gatos em processo de envelhecimento sejam anestesiados com segurança até a idade avançada. O conceito médico de qualidade de vida é abordado, incluindo as informações mais recentes disponíveis em medicina veterinária. Isso inclui as considerações relativas ao final da vida, como cuidados paliativos e cuidados intensivos para pacientes com doenças avançadas, bem como recomendações sobre o estabelecimento dos "orçamentos para os cuidados de saúde", o que influencia consideravelmente o que pode ser feito por cada gato. As diretrizes também reconhecem que cada tutor será diferente nesse aspecto relativo ao orçamento dos cuidados de saúde; portanto, é importante estabelecer o que é razoável e prático para cada tutor. Uma discussão sobre a eutanásia oferece algumas recomendações para ajudar o tutor a tomar uma decisão que reflita o que é melhor para cada gato.

**Palavras-chave:** Gatos idosos; fragilidade; comorbidades; qualidade de vida; sarcopenia; pressão arterial; dor; hipertensão arterial; doença renal crônica; hipertireoidismo; osteoartrite; doença articular degenerativa; diabetes mellitus; anestesia; doença gastrointestinal; distúrbios odontológicos; câncer; síndrome de disfunção cognitiva; final da vida; cuidados paliativos; cuidados intensivos para pacientes com doenças avançadas; orçamentos com os cuidados de saúde; eutanásia

## Introdução

Desde a publicação das '2009 AAFP Senior Care Guidelines' (Diretrizes para Cuidados com Gatos Idosos da AAFP de 2009),<sup>1</sup> nosso conhecimento teve um avanço significativo e, hoje em dia, os tutores esperam um maior nível de cuidados para os seus pets. Na medicina humana, a gerontologia não tem especialistas suficientes por vários motivos. Na medicina felina, a maioria de nós adora cuidar de gatos mais velhos; muitas vezes, são nossos pacientes favoritos. É provável que conseguiríamos preencher uma especialidade em gerontologia felina com médicos-veterinários entusiasmados e apaixonados por gatos. Em resposta aos avanços recentes e ao maior interesse em medicina felina, principalmente de gatos idosos, apresentamos orientações atualizadas nestas 'Diretrizes para Cuidados com Gatos Idosos da AAFP de 2021'.

A fragilidade é uma síndrome, mais comum com o avanço da idade, em que o paciente apresenta uma diminuição da reserva funcional que leva não só a um declínio no desempenho fisiológico e cognitivo, mas também a uma maior vulnerabilidade a desfechos clínicos adversos.

Consideramos "idoso" (senior em inglês) um termo que descreve a idade. Embora o gato idoso seja definido como um animal com mais de 10 anos de idade nas '2021 AAHA/AAFP Feline Life Stage Guidelines' (Diretrizes dos Estágios de Vida dos Gatos da AAHA / AAFP de 2021),<sup>2</sup> pode ser mais apropriado se referir a alguns gatos como idosos já aos 8 anos de idade, possivelmente mais cedo para determinadas raças ou aquelas com predisposições genéticas.<sup>3,4</sup> A Força-Tarefa considera que o termo "geriátrico" é mais uma declaração do estado de saúde e não tem uma idade especificamente associada. A Força-Tarefa também reconhece o conceito mais recente de "fragilidade", a qual desempenha um papel muito importante no cuidado de humanos idosos e está se tornando mais significativa na medicina felina.

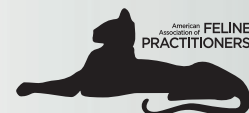

**Michael Ray**  
DVM  
Co-Chair\*

The Cat Clinic of Roswell,  
Roswell, GA, USA

**Hazel C Carney**  
DVM, MS, DABVP  
(Canine/Feline)  
Co-Chair\*

WestVet Emergency and  
Specialty Center, Garden  
City, ID, USA

**Beth Boynton**  
DVM

College of Veterinary  
Medicine,  
Western University of Health  
Sciences, Pomona, CA, USA

**Jessica Quimby**  
DVM, PhD, DACVIM

The Ohio State University,  
Department of Veterinary  
Clinical Sciences,  
Columbus, OH, USA

**Sheilah Robertson**  
BVMS (Hons), PhD,  
DACVAA, DECAVAA,  
DACAW, DECAVAA  
(WSEL), MRCVS

Senior Medical Director,  
Lap of Love Veterinary  
Hospice, Lutz, FL, USA

**Kelly St Denis**  
MSc, DVM, DABVP (Feline)

Brantford, ON, Canada

**Helen Tuzio**  
DVM, DABVP (Feline), CVA

Forest Hills Cat Hospital,  
Middle Village, NY, USA

**Bonnie Wright**  
DVM, DACVAA

Mistralvet, Johnstown,  
CO, USA

\*Corresponding authors:  
mray@catclinicofroswell.com  
hcccats@gmail.com

| SUMÁRIO                                                                              | página |
|--------------------------------------------------------------------------------------|--------|
| ❖ Introdução                                                                         | 613    |
| ❖ A consulta de rotina dos gatos idosos                                              | 614    |
| - Coleta de informações: entendendo as preocupações dos tutores sobre seus gatos     | 614    |
| - O exame físico dos gatos idosos                                                    | 616    |
| ❖ Testes diagnósticos recomendados                                                   | 617    |
| ❖ Ferramentas de gestão que otimizam a saúde do gato em processo de envelhecimento   | 619    |
| ❖ Problemas concomitantes a serem considerados no gato em processo de envelhecimento | 621    |
| - Anestesia                                                                          | 621    |
| - Hipertensão arterial                                                               | 621    |
| - Doença renal crônica                                                               | 621    |
| - Hipertireoidismo                                                                   | 622    |
| - Diabetes mellitus                                                                  | 623    |
| - Distúrbios odontológicos                                                           | 623    |
| - Doença gastrointestinal                                                            | 624    |
| - Câncer                                                                             | 624    |
| - Fontes contínuas de dor                                                            | 625    |
| - Síndrome de disfunção cognitiva                                                    | 626    |
| ❖ Manejo de doenças complexas                                                        | 628    |
| ❖ Qualidade de vida                                                                  | 629    |
| - Modificações do ambiente                                                           | 630    |
| ❖ Final da vida                                                                      |        |
| - Cuidados paliativos                                                                | 630    |
| - Orçamentos com os cuidados de saúde                                                | 630    |
| - Tomada de decisões éticas e conversas difíceis                                     | 630    |
| - Luto antecipatório                                                                 | 631    |
| - Eutanásia                                                                          | 631    |
| ❖ Resumo dos pontos                                                                  | 631    |
| ❖ Material complementar                                                              | 631    |
| ❖ Referências                                                                        | 632    |

**A avaliação de rotina facilita a manutenção da saúde e a detecção precoce de doenças. Isso traz menor custo e é mais bem-sucedido do que a gestão de crises.**

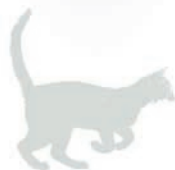

Estas Diretrizes concentram-se no exame do gato e na consulta com seu tutor – os quais, juntos, fornecem a melhor compreensão das necessidades de cada gato. Também enfatiza que o envolvimento do tutor na avaliação de um gato idoso é crucial e afeta nossa interpretação dos achados clínicos. Embora tenhamos feito uma breve discussão sobre doenças específicas, nosso foco permanece em cada paciente individualmente e na forma como seu processo de envelhecimento influencia seu bem-estar. Abordamos a ocorrência comum de comorbidades e como elas trazem complexidade aos cuidados de idosos. Também queremos enfatizar que os gatos idosos frequentemente lidam com uma ou mais fontes de dor crônica. A Força-Tarefa propõe que a dor seja considerada como uma doença em si que pode ter uma grande influência sobre a qualidade de vida. Além disso, como a questão de ensinar os tutores a melhorar a qualidade de vida desses pacientes é a prioridade número um, oferecemos soluções práticas para situações de saúde multifatoriais. Os cenários desafiadores incluem os cuidados no final da vida com as interações dos cuidados paliativos para pacientes com doenças avançadas, as questões relativas à eutanásia e o reconhecimento dos possíveis encargos para o tutor do gato.

Para atender melhor a essas demandas, incentivamos os médicos-veterinários a avaliar mais de perto o processo de envelhecimento, e não apenas o diagnóstico específico. Por fim, esperamos aumentar não só o conhecimento sobre os gatos mais idosos tanto para os tutores como para os médicos-veterinários, mas também o nível de cuidados veterinários prestados para esses gatos.

## A consulta de rotina de gatos idosos

### Coleta de informações: entendendo as preocupações dos tutores sobre seus gatos

Muitos gatos domésticos têm experimentado um aumento na expectativa de vida, em virtude de melhorias nos cuidados veterinários e na nutrição, bem como em função de tutores mais informados e engajados. Isso dá aos médicos-veterinários a oportunidade de adotar uma abordagem completa e abrangente para a avaliação e manejo de pacientes felinos idosos. Orientar os clientes para avaliar mudanças sutis que possam apontar para um distúrbio subjacente nos gatos pode ajudá-los a fazer uma parceria com o médico-veterinário para observar seus companheiros felinos mais de perto. A avaliação de rotina facilita a manutenção da saúde e a detecção precoce de doenças, o que muitas vezes também facilita seu tratamento e prevenção e pode levar a uma melhor qualidade de vida; além de ter um menor custo, esse tipo de abordagem é mais bem-sucedido do que a gestão de crises.

O ideal é agendar consultas mais longas para os gatos idosos. Embora geralmente tenhamos a perspectiva de defender o gato, conhecer os recursos, as habilidades, os comportamentos e as crenças do cliente garante que abordemos as preocupações desse cliente. Enviar um questionário a ser preenchido com antecedência e verificar os objetivos do cliente no início da consulta facilitam essa compreensão. Fazer perguntas abertas relacionadas com todos os sistemas corporais gera dados mais significativos. As observações do cliente podem ajudar o médico-veterinário a detectar alterações sutis; entretanto, muitos clientes podem não ter consciência de mudanças graduais até que façamos perguntas provocativas. Vídeos gravados pelo cliente contendo as atividades do paciente em

## ABREVIATURAS

|                                          |                                                 |
|------------------------------------------|-------------------------------------------------|
| ❖ AINE (anti-inflamatório não esteroide) | ❖ NED (necessidades energéticas diárias)        |
| ❖ DAD (doença articular degenerativa)    | ❖ NER (necessidades energéticas em repouso)     |
| ❖ DM (diabetes mellitus)                 | ❖ PA (pressão arterial)                         |
| ❖ DRC (doença renal crônica)             | ❖ SDMA (dimetilarginina simétrica)              |
| ❖ ECC (escore de condição corporal)      | ❖ T4 (hormônio tireoidiano)                     |
| ❖ ECM (escore de condição muscular)      | ❖ TFG (taxa de filtração glomerular)            |
| ❖ GI (gastrointestinal)                  | ❖ UPC (relação de proteína:creatinina na urina) |
| ❖ ITU (infecção do trato urinário)       |                                                 |

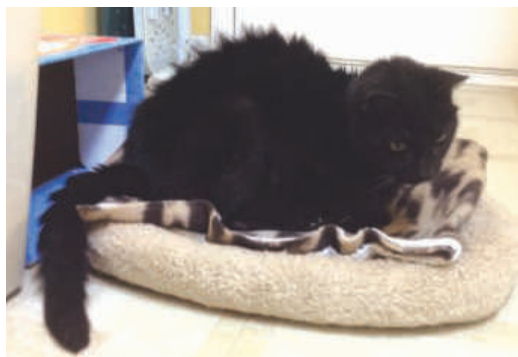

**Figura 1** Este gato de 15 anos de idade exibe uma diminuição no padrão de lambadura para autolimpeza. Cortesia de Sheilah Robertson

casa podem fornecer informações adicionais sobre o estado de saúde do gato. Obter um histórico completo e sistemático pode ser um pouco mais demorado no início, mas geralmente resulta em um diagnóstico mais preciso e um cuidado mais efetivo do gato idoso.

Os membros da Força-Tarefa consideram os seguintes pontos-chave ao elaborar um plano para verificar o estado do gato:

✦ **Ambiente:** como a habitação do gato está estruturada; quais pessoas e/ou outros pets compartilham o espaço; o tempo que o gato passa fora (em perambulação, na coleira ou em recinto ao ar livre); se o gato precisa passar por escadas; a rotina de alimentação e o(s) local(is) dos pontos de alimentação; a postura, os padrões e os locais de repouso; o número, o tipo e a localização das bandejas sanitárias.

✦ **Ingestão:** os produtos específicos fornecidos, a quantidade consumida (ingestão calórica); os suplementos e/ou medicamentos administrados; o consumo de presas ou outras fontes alimentares; os preventivos utilizados; as observações do comportamento de mastigação; a estimativa da ingestão de água.

✦ **Eliminações:** os locais, a frequência e a quantidade de micção e defecação (tamanho dos torrões de areia sanitária, quantidade de fezes eliminadas, escore fecal); qualquer início repentino de comportamento incomum (p. ex., eliminação em local inadequado) no paciente atual ou em outro gato (pode refletir doença oculta); um gato também pode detectar doenças em um de seus companheiros da casa se a doença alterar o odor ou as eliminações deste animal.

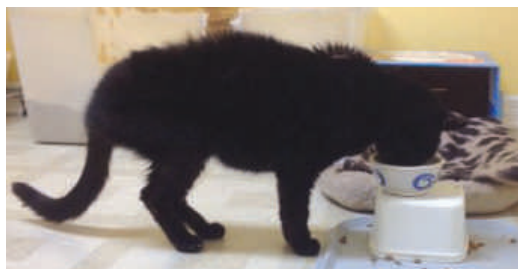

**Figura 3** Mesmo gato da Figura 1, mostrando sinais de fragilidade, com perda de massa e força muscular. Este gato idoso foi diagnosticado com sarcopenia, osteoartrite e hipertireoidismo. Cortesia de Sheilah Robertson

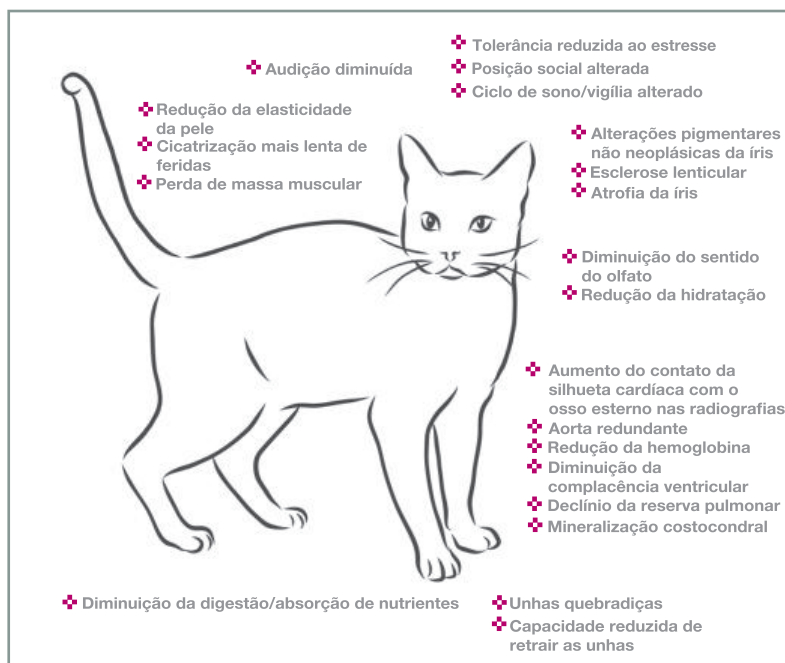

**Figura 2** Mudanças associadas ao envelhecimento (e observadas com frequência em gatos idosos aparentemente saudáveis)

Embora o envelhecimento saudável signifique coisas distintas para diferentes pessoas em relação a si mesmas e a seus gatos, é provável que o conforto e o prazer de viver sejam alvos comuns.

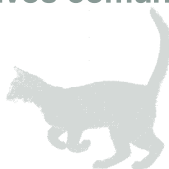

✦ **Padrões de atividades:** hábitos de lambadura para autolimpeza (Figura 1), vocalizações e interações com outros animais/pessoas; comportamento e locais de repouso; resposta a sinais visuais e sons; comportamento de saltos e brincadeiras (a solicitação aos clientes para que gravem vídeos desde a tenra idade permitirá comparações com os níveis atuais de atividade).

Os médicos-veterinários costumam citar o adágio: "A velhice não é uma doença", mas é um processo. Tal como acontece com todas as espécies, são observadas mudanças gato em processo de envelhecimento (Figura 2).

A perda de massa muscular em idosos tem importantes implicações para o estado de saúde. A caquexia se refere à perda de peso diante de doença subjacente.<sup>5</sup> A sarcopenia diz respeito à perda de massa muscular como uma síndrome associada ao envelhecimento, independentemente de doença.<sup>5</sup> A sarcopenia inclui uma perda tanto de massa como de força muscular (Figura 3). Isso pode se manifestar não só como uma diminuição dos saltos e da força física, mas também como uma redução do nível de atividades e interações. As manifestações físicas da sarcopenia se cruzam com as manifestações fisiológicas da fragilidade. Dada a associação de sarcopenia com desfechos ruins, o reconhecimento dos sinais de fragilidade felina é particularmente importante.<sup>6</sup> Ao se detectar sinais de fragilidade, explore as possíveis causas patológicas. Mesmo que nenhuma doença seja encontrada, as intervenções terapêuticas precoces podem ajudar a restabelecer algumas funções.

O manejo nutricional pode ser benéfico. Dietas de alta digestibilidade ricas em antioxidantes e ácidos graxos ômega-3,<sup>7</sup> bem como brinquedos, quebra-cabeças interativos e enriquecimento ambiental,<sup>8,9</sup> podem ajudar a retardar o desenvolvimento da sarcopenia.

Oscilações inexplicáveis no peso corporal, no escore de condição corporal (ECC) e/ou no escore de condição muscular (ECM) são problemas que devem ser investigados e tratados como doenças. Considere as mudanças de peso em relação ao tamanho do gato. Gatos pequenos podem não mudar muito em termos absolutos, mas uma mudança proporcional pode ser significativa. A composição corporal se altera mesmo com um peso constante; por isso, a avaliação simultânea do ECM e ECC é essencial. Mais informações sobre os escores de condição corporal e muscular são fornecidas pela ISFM (do inglês *International Society of Feline Medicine*, Sociedade Internacional de Medicina Felina; [www.bit.ly/ISFMMCS](http://www.bit.ly/ISFMMCS)). Gatos com sobrepeso e abaixo do peso ideal têm riscos de saúde associados.<sup>9,10</sup>

### O exame físico de gatos idosos

Pessoas saudáveis são incentivadas a fazer exames médicos de rotina anualmente. A expectativa de vida de um gato é cinco vezes menor que a de um ser humano; então, uma frequência equivalente de check-up anual em um gato adulto saudável seria a cada 10-11 semanas! Embora isso talvez não seja algo praticável, essa frequência enfatiza a necessidade de mais de um exame anual (ver quadro). A capacidade inata do gato de esconder doenças torna o exame físico regular muito mais crítico em felinos idosos.

A Força-Tarefa recomenda exames semestrais para gatos de 10-15 anos de idade, com exames a cada 4 meses para idosos saudáveis acima de 15 anos. Aqueles com problemas crônicos de saúde talvez tenham de ser examinados com maior frequência, dependendo da gravidade e estabilidade de suas doenças.

Os gatos, principalmente os idosos, devem ser manuseados com cuidado. Caso se saiba antecipadamente que o gato esteja com dor ou que um exame será particularmente doloroso, o fornecimento de analgesia é uma medida apropriada e recomendada, conforme descrito nas '2015 AAHA/AAFP Pain Management Guidelines' (Diretrizes de Controle da Dor da AAHA/AAFP de 2015).<sup>12</sup> Forneça analgésicos e/ou ansiolíticos aos pacientes que se opõem à manipulação por estresse ou dor. Se o estresse ou a dor não puderem ser controlados de forma adequada e segura, talvez seja necessário desistir do exame e reagendá-lo.

### Quadro 1

#### O exame começa em casa

É importante orientar os clientes que o início de uma consulta para exames começa em casa. Os gatos forçados a entrar na caixa de transporte ou agitados de um lado para o outro pela alça dessa caixa podem apresentar cinetose de viagem (o famoso "enjoo do movimento"), hipertensão arterial ou outros sinais de estresse que afetam adversamente os achados do exame físico e os resultados dos testes sanguíneos. O uso de técnicas descritas nas 'AAFP and ISFM Feline-Friendly Handling Guidelines' (Diretrizes para o Manuseio Amigável dos Felinos da AAFP e ISFM)<sup>11</sup> ajudará a reduzir o estresse. Quando as consultas dos pacientes são uma experiência positiva, os clientes ficam mais calmos e mais propensos a marcar outra consulta para avaliar melhor as questões médicas.

**Oscilações inexplicáveis no peso corporal, no escore de condição corporal (ECC) e/ou no escore de condição muscular (ECM) são problemas que devem ser investigados e tratados como doenças.**

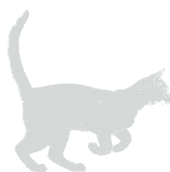

Um exame completo começa pela observação à distância. A simples observação (inspeção visual) pode ajudar a detectar mudanças não só nos padrões respiratórios, mas também na marcha, postura, força, coordenação e visão. O exame físico com palpação pode ser realizado em qualquer ordem, desde que ele seja minucioso e contanto que as áreas doloridas sejam examinadas por último. Para reduzir o estresse, deixe as partes mais invasivas do exame para o final, como o exame odontológico, a medição da temperatura ou o corte das unhas, a coleta de amostras e os estudos de imagem.<sup>2</sup>

Particularmente em gatos com mais de 10 anos de idade, a determinação da pressão arterial em cada exame fornece informações essenciais. O risco de hipertensão arterial aumenta com a idade<sup>13,14</sup> e é mais frequentemente identificado em gatos com 10 anos ou mais.<sup>15</sup> Se não tratada, a hipertensão arterial pode causar danos graves a órgãos-alvo, como olhos, coração, cérebro e rins,<sup>16,17</sup> os quais podem não ser reversíveis. As medições de rotina em cada exame podem ajudar a reduzir a hipertensão situacional.

Informações detalhadas sobre o protocolo-padrão para a medição da pressão arterial sistêmica em gatos podem ser encontradas no 'AAFP Hypertension Educational Toolkit'<sup>18</sup> (Material Informativo sobre Hipertensão Arterial da AAFP) e nas 'ISFM Consensus Guidelines on the Diagnosis and Management of Hypertension in Cats' (Diretrizes de Consenso da ISFM sobre o Diagnóstico e Tratamento da Hipertensão Arterial em Gatos).<sup>17</sup> Vídeos de medição da pressão arterial produzidos pela ISFM estão disponíveis em [www.youtube.com/user/iCatCare](http://www.youtube.com/user/iCatCare).

O tratamento ideal só pode ser planejado se o peso corporal do gato for medido e os escores de condição muscular e corporal forem determinados em cada consulta.

Para o gato idoso, o estado de hidratação é extremamente importante, pois algumas das comorbidades mais comuns, como doença renal crônica e diabetes mellitus, produzem uma perda gradual dos líquidos corporais. A perda de gordura subcutânea e/ou da elasticidade tecidual pode influenciar a interpretação dos resultados do teste de turgor da pele, e a umidade das mucosas pode ser mais indicativa do estado de hidratação.

A avaliação da pele, das unhas e da pelagem envolve uma atenção especial à qualidade das unhas, pois elas tendem a engrossar e encravar. Oferecer consultas veterinárias para o corte das unhas representa um meio de ajudar os tutores que não conseguem apará-las rotineiramente. As alterações na qualidade das unhas podem ser particularmente problemáticas para os gatos acometidos por artrite muito dolorosa a ponto de não conseguirem usar um poste de arranhadura próprio para esses animais.

Um exame completo do nariz e da boca inclui a palpação dos contornos nasais e a inspeção da gengiva, faringe, palato, área sublingual e dentes, observando cuidadosamente a perda incomum de dentes. Além disso, a palpação da área entre e sob as mandíbulas pode identificar tumores ou linfadenopatia. Qualquer assimetria observada durante a avaliação da cabeça justifica uma investigação mais detalhada.

A avaliação oftalmológica implica um exame cuidadoso das câmaras anterior e posterior dos olhos, da cor e do formato da íris, bem como da região da retina. As lesões que comumente evoluem com o envelhecimento são esclerose lenticular (ou

nuclear), atrofia e/ou melanose da íris, catarata focal ou linear<sup>19,20</sup> e produção lacrimal variável.<sup>21,22</sup> A visualização da retina é particularmente importante para a detecção precoce de alterações vasculares ou edema – que, no caso, são sinais de alerta de hipertensão arterial e subsequente descolamento de retina.<sup>22-24</sup> Avaliações sequenciais do olho e imagens concomitantes de lesões, ou mudanças de cor e alterações estruturais, alertarão o médico-veterinário inicialmente para a possibilidade de uma neoplasia em desenvolvimento e, potencialmente, permitirão um tratamento para salvar a vida do paciente.

A palpação da região cervical do gato quando ele estiver sentado com o pescoço estendido ou em estação (i. e., em pé) com a cabeça elevada e virada para cada lado revelará uma glândula tireoide palpável em 80% ou mais dos casos de hipertireoidismo felino; no entanto, também pode haver um nódulo palpável em gatos com doença não tireoidiana.<sup>25-27</sup>

Proceda à auscultação dos quatro quadrantes torácicos para determinar a frequência cardíaca e respiratória, identificar a presença de sopros ou arritmias cardíacas e avaliar os ruídos pulmonares. A porção cranial do tórax deve ser compressível; massas cranianas no mediastino podem reduzir a compressibilidade (ou seja, ausência de flexibilidade das costelas cranianas).

Utilizando uma técnica suave e delicada, tente palpar cada órgão durante a palpação abdominal, observando o seguinte: (a) indícios de dor ou massas, (b) áreas de alças intestinais espessadas, (c) a quantidade e a consistência das fezes, (d) a textura, o formato e o tamanho dos rins e da bexiga urinária, bem como (e) o tamanho e a localização de linfonodos identificáveis. A palpação da cadeia mamária pode ser incorporada ao exame abdominal.

O exame ortopédico pode ajudar a identificar alterações nas articulações, incluindo espessamento, líquido, crepitação, dor e amplitude de movimento. Realize a palpação suave e delicada de cada membro e articulação para verificar a espessura ou a sensibilidade. Alguns gatos podem não demonstrar dor nem crepitação à palpação. Avalie a massa muscular e atribua um escore de condição muscular. Preste uma atenção especial às áreas de atrofia muscular, pois elas podem indicar condições dolorosas localizadas. Áreas de auto-higienização (limpeza) ou lambedura excessivas podem indicar dor subjacente. A perda generalizada de massa muscular parece mais indicativa de doença sistêmica.

Um exame miofascial é útil para avaliar a viscosidade, a mobilidade, a temperatura e o conforto das estruturas de tecidos moles. Se realizado corretamente, o exame consiste em uma abordagem relaxante, suave e inquisitiva para avaliar a dor de múltiplas origens, inclusive a de origem osteoartrítica, espinal (i. e., coluna vertebral), tecidual (i. e., de tecidos moles) e visceral. O exame miofascial se baseia na palpação dos tecidos moles em sintonia com os indicadores sutis de dor, como mudanças na postura corporal, na expressão facial, nos padrões de tensão miofascial (i. e., nos músculos ou na fáscia), na aderência da pele, e no calor. A dor

detectada durante um exame miofascial pode se originar a partir da superfície que está sendo palpada ou ser um reflexo de dor proveniente de vísceras internas mais profundas abaixo da superfície.

Um vídeo demonstrando o exame miofascial está incluído no material complementar (ver página 631).

Por fim, compare todos os parâmetros com os do último exame para identificar oscilações como indicadores precoces de doença ou processo degenerativo.

## Testes diagnósticos recomendados

Os exames habituais combinados com a realização de testes diagnósticos iniciais (basais) podem ajudar a detectar doenças pré-clínicas e servir como ponto de referência para rastrear futuras oscilações. Considere a execução desses testes diagnósticos iniciais (Tabela 1) pelo menos uma vez por ano, começando entre os 7 e 10 anos e aumentando a frequência com o avanço da idade.

**Tabela 1** Testes diagnósticos recomendados para gatos idosos

| Testes iniciais (basais)                                                                                                                                                                                                                                               | Testes auxiliares*                                                                                                                                                                                                                                                            |
|------------------------------------------------------------------------------------------------------------------------------------------------------------------------------------------------------------------------------------------------------------------------|-------------------------------------------------------------------------------------------------------------------------------------------------------------------------------------------------------------------------------------------------------------------------------|
| <b>Hemograma completo:</b><br>hematócrito, eritrograma, leucograma, contagem diferencial, plaquetas                                                                                                                                                                    | Pesquisa de anticorpo/antígeno de dirofilariose ELISA para o vírus da leucemia felina (FeLV) e o vírus da imunodeficiência felina (FIV)<br>PCR para o provírus do FeLV <sup>28</sup><br>Revisão de lâminas de hematologia                                                     |
| <b>Perfil bioquímico sérico:</b><br>proteína total, albumina, globulina, fosfatase alcalina, alanina aminotransferase, glicose, ureia (também conhecida como nitrogênio ureico sanguíneo [BUN]), creatinina, potássio, fósforo, sódio e cálcio como parâmetros mínimos | Cálcio ionizado/paratormônio (PTH)/peptídeo relacionado com o PTH<br>Cobalamina (B12)/folato<br>Lipase pancreática específica felina<br>Frutosemina<br>Fragmento N-terminal do peptídeo natriurético tipo B (NT-pro BNP)<br>SDMA<br>Imunoreatividade semelhante à da tripsina |
| <i>Parâmetros opcionais muitas vezes incluídos em perfis normalmente disponíveis no mercado:</i> aspartato transaminase, gamaglutamiltransferase, creatinquinase, bilirrubina total, cloreto, HCO <sub>3</sub> ou CO <sub>2</sub> , magnésio                           |                                                                                                                                                                                                                                                                               |
| <b>Urinálise:</b> densidade urinária, sedimento urinário, glicose, cetonas, bilirrubina, proteína, pH da urina                                                                                                                                                         | Urocultura/antibiograma<br>Relação de proteína: creatinina na urina                                                                                                                                                                                                           |
| <b>Total T4†</b>                                                                                                                                                                                                                                                       | T4 livre/hormônio tireoestimulante                                                                                                                                                                                                                                            |
| <b>Pressão arterial†</b>                                                                                                                                                                                                                                               |                                                                                                                                                                                                                                                                               |
|                                                                                                                                                                                                                                                                        | Exame coprológico (centrifugação)                                                                                                                                                                                                                                             |
|                                                                                                                                                                                                                                                                        | Ecocardiograma<br>Eletrocardiograma<br>Radiografia<br>Ultrassonografia                                                                                                                                                                                                        |

\* Podem ser indicados conforme o estado de saúde do paciente e/ou os resultados dos testes basais

† Ver discussão no texto

A incidência de muitas doenças aumenta com o avanço da idade dos gatos, e as comorbidades são comuns. Dados mais sólidos sobre a incidência de doenças por idade ajudariam os médicos-veterinários na determinação da importância e da frequência desejada dos testes; esses dados, no entanto, são insuficientes. Os médicos-veterinários devem, portanto, confiar no bom senso clínico e nas conversas com o cliente específicas para cada paciente.

Independentemente da idade do gato, fica indicada uma avaliação diagnóstica mais frequente ou mais extensa (Tabela 1) nos seguintes casos:

- ❖ Quando quaisquer anormalidades são observadas no histórico clínico ou no exame físico, ainda que os exames laboratoriais iniciais pareçam normais.
- ❖ Na suspeita ou confirmação de doença em consultas veterinárias de rotina.
- ❖ Na existência de comorbidades que exigem monitoramento adicional.
- ❖ Na prescrição de medicamentos.

A apreciação e avaliação diagnóstica podem ser necessárias a cada 3-6 meses em pacientes muito idosos, naqueles sob tratamento médico crônico e em outros com múltiplas comorbidades.

Em caso de dúvida quanto à suspeita de enfermidades ou alterações sutis, reavalie o paciente para estabelecer a persistência e/ou progressão da anormalidade. As oscilações de dados biométricos no gato fornecem informações valiosas e são mais importantes do que um único dado pontual.

Examine o paciente como um todo e veja as oscilações no contexto. Por exemplo, aumentos progressivos na pressão arterial ao longo do tempo podem ajudar a diferenciar entre hipertensão situacional e hipertensão verdadeira que necessita de terapia médica.

Os dados biométricos também podem ser mais convincentes quando se utilizam vários testes em conjunto. Por exemplo, a avaliação da presença de doença renal crônica, usando todas as informações disponíveis – achados do exame físico, creatinina sérica, densidade urinária, dimetilarginina simétrica (SDMA) e algoritmos preditivos de diagnóstico, dos quais alguns estão disponíveis como serviços patenteados (p. ex., RenalTech; Antech Diagnostics) – é mais eficaz do que simplesmente avaliar a concentração de creatinina sérica isolada.

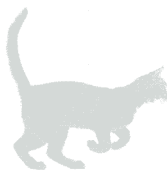

**As oscilações de dados biométricos no gato fornecem informações valiosas e são mais importantes do que um único dado pontual.**

**Examine o paciente como um todo e veja as oscilações no contexto.**

**Pode ser difícil identificar a dor em gatos. Com a orientação adequada, os clientes podem aprender a detectar mudanças na mobilidade normal e nos padrões de comportamento de seu gato que sejam indicativas de dor.**

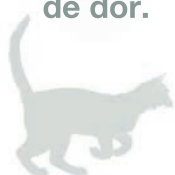

**Tabela 2**

**Identificação dos sinais sutis de dor em casa e na clínica**

| Em casa    | Padrões de comportamento                  | <ul style="list-style-type: none"> <li>❖ Mudanças nas interações com familiares, visitantes, outros pets da família</li> <li>❖ Diminuição do apetite e da ingestão de alimentos</li> <li>❖ Redução do nível de brincadeiras</li> <li>❖ Crescimento excessivo das unhas, sinalizando um declínio no comportamento de arranhadura</li> <li>❖ Mudanças nas rotinas normais</li> </ul>                                                                                                                               |
|------------|-------------------------------------------|------------------------------------------------------------------------------------------------------------------------------------------------------------------------------------------------------------------------------------------------------------------------------------------------------------------------------------------------------------------------------------------------------------------------------------------------------------------------------------------------------------------|
|            | Mobilidade                                | <ul style="list-style-type: none"> <li>❖ Mudança nos espaços normais de repouso</li> <li>❖ Aumento do sono</li> <li>❖ Diminuição dos saltos</li> <li>❖ Dificuldade de subir escadas e utilizar superfícies intermediárias para chegar a superfícies mais elevadas ou total relutância a pular em superfícies mais altas</li> <li>❖ Deslizar para baixo nas bordas das superfícies para diminuir a altura do salto</li> <li>❖ Evacuação domiciliar em locais inadequados</li> <li>❖ Claudicação (rara)</li> </ul> |
|            | Resposta ao toque                         | <ul style="list-style-type: none"> <li>❖ Mudanças nas preferências de carícias</li> <li>❖ Aversão repentina a cuidados de higienização, talvez apenas em um local físico específico</li> <li>❖ Aversão súbita a ser apanhado e carregado</li> </ul>                                                                                                                                                                                                                                                              |
| Na clínica | Personalidade                             | <ul style="list-style-type: none"> <li>❖ Mudança de comportamento: menos ou mais acessível</li> <li>❖ Escondido na caixa de transporte quando antes saía voluntariamente</li> </ul>                                                                                                                                                                                                                                                                                                                              |
|            | Mobilidade                                | <ul style="list-style-type: none"> <li>❖ Marcha alterada</li> <li>❖ Alterações nos saltos (não pula mais na mesa de exame, dificuldade em se sentar na cadeira da sala de exame, etc.)</li> <li>❖ Mudanças nos comportamentos exploratórios</li> </ul>                                                                                                                                                                                                                                                           |
|            | Aparência                                 | <ul style="list-style-type: none"> <li>❖ Evidência de emaciação muscular</li> <li>❖ Evidência de aumento ou diminuição da auto-higienização ou lambedura (alopecia, emaranhados de pelo, pelagem sem brilho)</li> <li>❖ Crescimento excessivo das unhas</li> </ul>                                                                                                                                                                                                                                               |
|            | Resposta ao toque                         | <ul style="list-style-type: none"> <li>❖ Relutância a carícias ou toques de exames</li> </ul>                                                                                                                                                                                                                                                                                                                                                                                                                    |
|            | Capacidade de coletar amostras biológicas | <ul style="list-style-type: none"> <li>❖ Resistência ao manuseio para coleta de sangue ou urina</li> <li>❖ Mudanças no comportamento, em comparação com o anterior (por exemplo, não se mostra mais confortável para a coleta de sangue dos membros posteriores)</li> </ul>                                                                                                                                                                                                                                      |

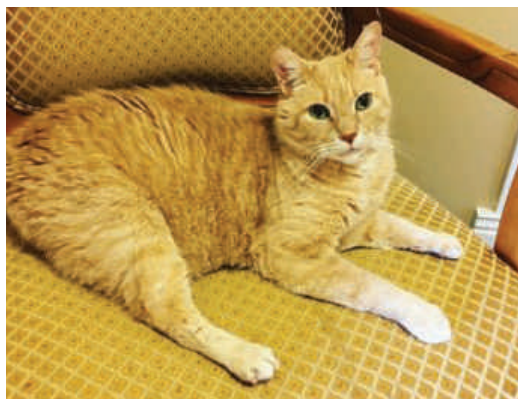

**Figura 4** Este gato de 12 anos de idade com artropatia degenerativa está deitado com as articulações do joelho e jarrete estendidas para ficar mais confortável. *Cortesia de Kelly St Denis*

### Ferramentas de gestão que otimizam a saúde do gato em processo de envelhecimento

Um estilo de vida saudável na idade idosa pode ser auxiliado pelo médico-veterinário por meio de orientação e conversa com o cliente. Deve-se considerar a possibilidade de tornar o ambiente doméstico amigável a pets idosos, orientando o tutor na compreensão das necessidades de seu gato idoso e fornecendo conselhos nutricionais. Quando não houver contraindicações, devem ser recomendados cuidados preventivos, incluindo vacinações de rotina, prevenção de parasitas e profilaxia dentária.

Os quadros de osteoartrite e espondilose deformante são as duas formas mais comuns de artropatia degenerativa em gatos (Figura 4).<sup>29</sup> Ambas as condições podem causar dor e mudanças comportamentais associadas a essa dor.<sup>29,30</sup> Pode ser difícil identificar a dor em gatos. Com a orientação adequada, os clientes podem aprender a detectar mudanças na mobilidade normal e nos padrões de comportamento de seu gato que sejam indicativas de dor (Tabela 2). As mudanças de mobilidade podem ser sutis, incluindo padrões de salto, evacuações em locais inadequados, variações nos locais de repouso e aumento do sono (Figuras 5 e 6).

Como a idade acarreta um maior risco de artropatia degenerativa<sup>31</sup> e outras alterações,

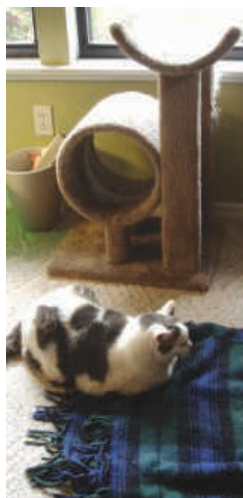

**Figura 5** Este gato de 11 anos de idade que exibiu relutância a pular e se empoleirar no arranhador foi examinado e diagnosticado com osteoartrite. *Cortesia de Sheilah Robertson*

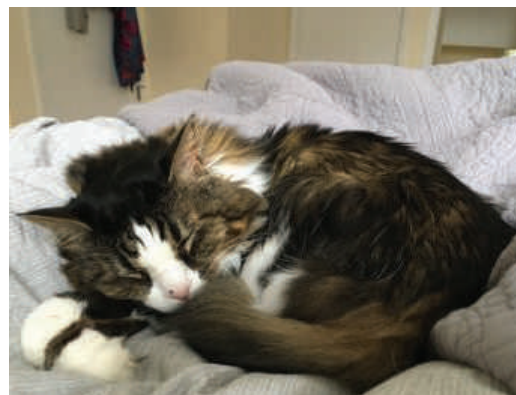

**Figura 6** Aumentos sutis no padrão de sono foram observados neste gato de 19 anos de idade. *Cortesia de Kathleen Neumann*

incluindo disfunção cognitiva, diminuição dos sentidos, "pré-frágilidade" ou fragilidade e possíveis problemas de saúde, todos os gatos idosos necessitam de cuidados redobrados em casa. Embora a idade por si só não seja um fator de risco de fragilidade, essa fragilidade se torna mais comum à medida que a idade avança. Adapte os cuidados para cada gato individualmente, fazendo referência aos cinco pilares de um ambiente felino saudável (ver adiante).<sup>8</sup> Oriente os clientes sobre a importância de fornecer recursos essenciais, incluindo bandejas sanitárias, vasilhas de comida, água potável, camas, superfícies para arranhador, esconderijos e espaços tridimensionais em vários locais da casa.<sup>8,9</sup> Incentive os clientes a fornecer itens que ajudem o gato em processo de envelhecimento, incluindo luzes noturnas para melhorar a visibilidade em áreas mais escuras, rampas e degraus para facilitar o acesso aos espaços favoritos (Figura 7) e uma variedade de superfícies e espaços de repouso. Tigelas para água e comida com as laterais baixas e bases largas que não interfiram com as vibrissas ("bigodes") são ideais para os idosos.<sup>32</sup> Os gatos idosos devem ter acesso seguro ao alimento com o mínimo de distrações e interrupções. A elevação das vasilhas de comida pode beneficiar aqueles com artropatia degenerativa, e alimentos aquecidos e/ou palatáveis podem estimular a ingestão.

À medida que as escalas de fragilidade se tornam mais bem definidas (Quadro 2), as intervenções para manter o gato idoso ativo e autossuficiente podem ser realizadas no ambiente doméstico. Embora a idade por si só não seja um indicador confiável de fragilidade, muitos fatores de fragilidade se tornam mais comuns com a idade avançada.<sup>33</sup> Conforme estabelecido para as escalas de fragilidade na medicina humana, as medições de fragilidade devem: (a) ser capazes de identificar indivíduos frágeis, (b) estar respaldadas por uma teoria causal biológica, e (c) prever de forma confiável os desfechos clínicos adversos e a resposta do paciente à terapia e aos fatores indutores de estresse. Em uma tentativa de identificar os fatores de fragilidade, os leitores podem utilizar a 'escala de fragilidade fenotípica'<sup>34</sup> e a 'escala do índice de fragilidade'.<sup>35</sup> A primeira se concentra em fatores fisiológicos específicos, e a última permite a incorporação da função psicológica e social para identificar o declínio cognitivo. Ambos são recursos fáceis de usar e repetíveis com avaliações em série. Com uma melhor identificação da fragilidade, podemos estabelecer ações corretivas, tanto em termos fisiológicos como psicológicos. Com maior consciência e reconhecimento, é possível identificar os fatores preditivos.

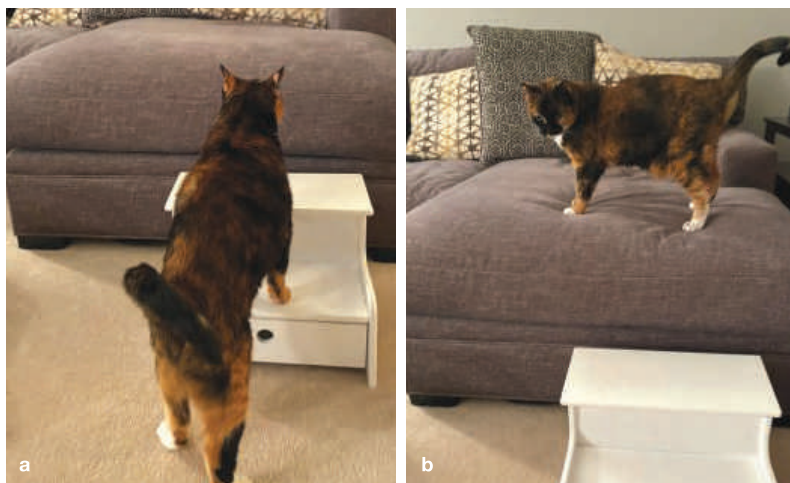

**Figura 7** (a, b) Este gato de 14 anos de idade com artropatia degenerativa dolorosa usa degraus para acessar o lugar de descanso favorito. *Cortesia de Heather O'Steen*

## Quadro 2

## Escala de fragilidade

| Escala de fragilidade fenotípica                                        |     |     | Escala do índice de fragilidade                                         |     |     |
|-------------------------------------------------------------------------|-----|-----|-------------------------------------------------------------------------|-----|-----|
| Condições/problemas clínicos presentes                                  | Sim | Não | Condições/problemas clínicos presentes                                  | Sim | Não |
| 1 Perda de peso não intencional                                         |     |     | 1 Déficit fisiológicos                                                  |     |     |
| 2 Fraqueza                                                              |     |     | 2 Déficit psicológicos (emocionais)                                     |     |     |
| 3 Baixa resistência, exaustão (esgotamento) precoce                     |     |     | 3 Déficit cognitivos (orientados para a tarefa)                         |     |     |
| 4 Lentidão e baixo nível de atividade                                   |     |     | 4 Déficit na função social                                              |     |     |
| Pré-fragilidade: 'Sim' para 2 de 4. Fragilidade: 'Sim' para 3 ou 4 de 4 |     |     | Pré-fragilidade: 'Sim' para 2 de 4. Fragilidade: 'Sim' para 3 ou 4 de 4 |     |     |

Adaptado de Fried et al.<sup>34</sup>Adaptado de Mitnitski et al.<sup>35</sup>

A obesidade em gatos é conhecida por diminuir a expectativa de vida;<sup>36</sup> com o avanço da idade, no entanto, a perda de peso é uma ocorrência mais comum.<sup>37</sup> ECCs de < 5/9 e de 9/9 são negativamente associados à sobrevida e ao tempo de vida.<sup>38</sup> A realização de consultas veterinárias de rotina e a orientação dos clientes para monitorar o peso corporal, o ECC e o ECM em casa podem melhorar a detecção precoce de oscilações negativas.

A eficiência do trato gastrointestinal (GI) muda com o tempo no gato em processo de envelhecimento. Os gatos entre 7-11 anos de idade necessitam de uma ingestão calórica reduzida,<sup>39</sup> enquanto aqueles com 12 anos de idade ou mais têm necessidades energéticas diárias (NED) maiores.<sup>39,40</sup> A ingestão de alimentos pode ser afetada negativamente por alterações cognitivas, distúrbios odontológicos e doenças sistêmicas.<sup>41</sup> A função diminuída do trato gastrointestinal em idosos também pode levar ao consumo de volumes menores de alimento em cada refeição; por essa razão, os gatos com mais de 10 anos de idade necessitam de dietas densas em calorias com proteínas altamente digeríveis oferecidas em pequenas quantidades várias vezes ao dia.<sup>9</sup> As necessidades energéticas em repouso (NER) podem ser determinadas utilizando o cálculo a seguir:<sup>42</sup>

$$\text{NER (kcal)} = 30 \times \text{peso corporal (kg)} + 70$$

Para determinar as necessidades energéticas diárias, adicione um fator de 10–20%, embora alguns gatos idosos possam exigir um fator de 25%.<sup>43</sup> As quantidades de alimentação podem ser determinadas com base na densidade calórica e nos nutrientes do alimento oferecido. Oriente os clientes a registrar a ingestão real e informar quaisquer alterações. Tempos mais lentos do trânsito gastrointestinal podem predispor os gatos idosos à desidratação das fezes e constipação.<sup>32</sup> Em alguns casos, o uso de dietas específicas<sup>44</sup> ou a adição de polietilenoglicol 3350 diariamente ao alimento pode ser benéfico para promover uma boa consistência das fezes.<sup>45</sup>

A Força-Tarefa da '2020 AAHA/AAFP Feline Vaccination Guidelines' (Diretrizes de Vacinação Felina da AAHA/AAFP de 2020) recomendou planos de vacinação individualizados com base em cinco variáveis de avaliação de risco: idade e estágio de vida, estado de saúde, exposição ao agente, histórico e imunodeficiência.<sup>46</sup> Os gatos idosos saudáveis e os gatos idosos com doenças controladas

são elegíveis para a vacinação com base nesses critérios. Embora as más condições de saúde possam aumentar o risco de efeitos colaterais, o mesmo gato pode ser mais suscetível a doenças infecciosas e se beneficiar da vacinação. O médico-veterinário terá de avaliar essas variáveis de risco paciente por paciente. Consulte as '2020 AAHA / AAFP Feline Vaccination Guidelines'<sup>46</sup> (Diretrizes de Vacinação Felina da AAHA/AAFP de 2020) para obter mais informações.

A prevenção regular de amplo espectro de parasitas é recomendada pelo Companion Animal Parasite Council (Conselho de Parasitas de Animais de Companhia), independentemente do estilo de vida do animal. Os riscos de exposição aumentam quando os gatos passam algum tempo em ambientes externos, inclusive em pátios ou recintos, ou são levados para tomar banho, ficar em hotéis ou receber outros cuidados, e quando outros animais domésticos têm um estilo de vida interior e exterior (i. e., dentro e fora de casa). No entanto, um estilo de vida estritamente interior (i. e., em ambientes internos) não elimina os riscos de exposição. É recomendável a proteção de rotina contra parasitas intestinais comuns, dirofilariose, pulgas e, em alguns casos, carrapatos.

Os distúrbios odontológicos e a dor associada em gatos geralmente passam despercebidos em casa. Os sinais clínicos podem incluir meneios de cabeça, patas à boca, protrusão da língua, hipersalivação ou fricção da cabeça contra o solo;<sup>47</sup> no entanto, os sinais costumam ser sutis e não estão explicitamente relacionados com distúrbios odontológicos. Os gatos podem apresentar alterações vagas nos níveis de atividade, no apetite e nas interações com a família e/ou outros sinais sutis de dor (Tabela 2). O risco de doença periodontal aumenta com a idade<sup>48</sup>, assim como o risco de reabsorção dentária,<sup>49,50</sup> tornando a avaliação odontológica completa um componente essencial de todos os exames de idosos. No paciente alerta (i. e., acordado), isso inclui o exame extraoral da cabeça, bem como o exame intraoral.<sup>47</sup> O exame de toda a arcada dentária pode ser difícil em gatos alertas, e as lesões podem não ser detectadas. Por exemplo, a reabsorção dentária é comumente encontrada primeiro nos dentes 307 e 407,<sup>49</sup> mas avaliar esses pré-molares inferiores pode ser um desafio no gato consciente. Técnicas de manuseio amigáveis para os gatos (cat-friendly) podem melhorar esse procedimento.<sup>11</sup> Um vídeo mostrando dicas amigáveis aos gatos para a realização de exames odontológicos completos em felinos está incluído como material complementar (consulte a página 631).

A avaliação odontológica completa requer anestesia e inclui não só exames extra e intraoral minuciosos, mas também a obtenção de radiografias

dentárias.<sup>47</sup> A idade avançada não deve ser um fator limitante para prosseguir com o atendimento odontológico sob anestesia.<sup>51</sup>

## Distúrbios concomitantes a serem considerados no gato em processo de envelhecimento

### Anestesia

Os procedimentos, incluindo ultrassonografia diagnóstica, endoscopia, colocação de tubo (sonda) de alimentação e cirurgia, necessitam de sedação ou anestesia. Os dados históricos indicam taxas de mortalidade mais altas em gatos comparativamente aos cães, bem como em gatos com mais de 12 anos de idade (grupo de comparação: 1-5 anos).<sup>52</sup> No entanto, foram identificados fatores de risco e, por conta disso, as práticas de anestesia foram modificadas para atenuar os resultados adversos. As 'AAFP Feline Anesthesia Guidelines' (Diretrizes de Anestesia Felina da AAFP) destacam a importância da redução do estresse (p. ex., gabapentina antes da consulta, manuseio amigável para os gatos<sup>53</sup> e cuidados de assistência e/ou enfermagem<sup>54</sup>) no período perioperatório. A ocorrência de taquicardia não é bem tolerada, e a reserva cardíaca diminuída torna o paciente mais idoso menos capaz de responder às perdas de líquidos ou à sobrecarga. As taxas de fluidos recomendadas para os gatos durante os procedimentos de anestesia são de 3 mL/kg/h para refletir o volume de sangue felino (50–60 mL/kg) e a prevalência de miocardiopatia hipertrófica; observe que isso é mais baixo que as taxas para os cães.<sup>55</sup> O tipo e o volume de fluido utilizado dependem de muitos fatores, incluindo a identificação e a condição física do paciente, bem como a duração e o tipo de procedimento.<sup>55</sup>

A medida que os seres humanos envelhecem, ocorre um declínio na capacidade funcional dos principais órgãos; a diminuição no tamanho do fígado e dos rins, bem como no fluxo sanguíneo a esses órgãos, resulta em um retardo no metabolismo e na excreção de medicamentos.<sup>56</sup> A redução da substância cinzenta do cérebro diminui a necessidade de anestésicos. A perda de massa muscular e a diminuição do controle termorregulatório tornam os humanos mais idosos suscetíveis à hipotermia, o que diminui ainda mais o metabolismo farmacológico e prolonga a recuperação anestésica.<sup>57</sup> É provável que essas alterações que afetam o metabolismo de medicamentos ocorram em gatos. Caso não sejam feitos ajustes com base nessas mudanças fisiológicas relacionadas com a idade, o risco de doses anestésicas excessivas aumenta consideravelmente.

### Hipertensão arterial

A hipertensão arterial em gatos é bem reconhecida; entretanto, em função da escassez de exames de triagem, é provavelmente subdiagnosticada.<sup>17</sup> A hipertensão felina pode ocorrer como uma alteração primária/idiopática, secundária a outra doença ou secundária ao estresse situacional.<sup>16</sup>

A hipertensão primária/idiopática é incomum em gatos e, portanto, a detecção de hipertensão arterial deve incitar uma investigação em busca da doença subjacente. A hipertensão secundária pode se desenvolver em associação com doença renal crônica, hipertireoidismo, hiperaldosteronismo

primário, diabetes mellitus, feocromocitomas e hiperadrenocorticismo hipofisário. O leitor deve consultar o 'AAFP Hypertension Educational Toolkit'<sup>18</sup> (Material Informativo sobre Hipertensão Arterial da AAFP) e as 'ISFM Consensus Guidelines on the Diagnosis and Management of Hypertension in Cats'<sup>17</sup> (Diretrizes de Consenso da ISFM sobre o Diagnóstico e Tratamento da Hipertensão Arterial em Gatos) para obter mais detalhes.

### Doença renal crônica

A doença renal é comum em gatos mais idosos e geralmente começa em gatos adultos maduros. O diagnóstico e o controle são bem documentados.<sup>58,59</sup> Contudo, alguns detalhes merecem ser mencionados:

- Os sinais clínicos de doença renal crônica podem passar despercebidos pelos tutores de gatos, podendo incluir poliúria, polidipsia, inapetência, náuseas, constipação, más condições da pelagem, perda de peso e emaciação muscular.

- Os exames laboratoriais de rotina (triagem e avaliação de oscilações) podem revelar a doença precocemente. Alguns pacientes com concentrações de creatinina sérica dentro dos intervalos de referência publicados podem, na verdade, ter doença renal crônica. A avaliação dos dados combinados, incluindo creatinina, densidade urinária, SDMA, peso corporal, ECM e estado de hidratação, é importante para a determinação da doença. Creatinina sérica persistente > 1,6 mg/dL (> 140 µmol/L), densidade urinária < 1,035 e SDMA > 14 µg/dL são indicativas de disfunção renal.

- A interpretação dos resultados da urinalise, particularmente a densidade urinária e a proteína, é de particular importância em gatos idosos. A coleta da urina por cistocentese permite uma maior precisão nos resultados. Se a densidade urinária estiver < 1,035, a medição deve ser repetida em uma amostra subsequente para confirmar a persistência. Determine a relação de proteína:creatinina na urina (RPC) para quantificar a proteinúria quando pertinente (ou seja, na ausência de hematúria macroscópica ou inflamação).

- Uma vez confirmado o diagnóstico de doença renal crônica e após a estabilização e hidratação do paciente, realiza-se o estadiamento pela International Renal Interest Society (IRIS, Sociedade Internacional de Interesse Renal). O estadiamento baseia-se na avaliação repetida da creatinina sérica (levando em consideração a SDMA) e o subestadiamento com base na pressão arterial e na relação de proteína:creatinina na urina (RPC). O estadiamento do paciente auxilia no controle da doença, enquanto o subestadiamento ajuda a determinar quando é indicada a intervenção para os quadros de hipertensão arterial e proteinúria.

- Avalie a nutrição, inclusive o histórico alimentar completo e a suficiência da ingestão calórica. Determine o peso corporal, o ECC e o ECM. Faça perguntas abertas sobre a alimentação do gato. Trate a falta de apetite e otimize a ingestão calórica com terapia antinauseante e estimulantes de apetite.<sup>60</sup>

- O fornecimento de dieta "renal" com restrição de fósforo demonstrou melhorar os distúrbios ósseos e minerais relacionados com a doença renal crônica, reduzir os episódios urêmicos e aumentar o tempo de sobrevida.<sup>61</sup> As dietas úmidas oferecem o benefício de melhorar a hidratação. Se um gato não ingerir uma dieta renal comercial, pode-se formular uma dieta caseira com a ajuda de um nutricionista. Alternativamente, pode ser colocado um tubo (sonda) de alimentação para otimizar a nutrição e a hidratação, além de auxiliar na administração de medicamentos.<sup>61</sup>

- Trate a desidratação para promover o fluxo sanguíneo renal e prevenir a constipação.

Caso não sejam feitos ajustes com base nas mudanças fisiológicas relacionadas com a idade, o risco de doses anestésicas excessivas aumenta consideravelmente.

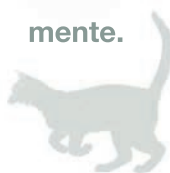

- ❖ Como a doença renal crônica é a principal causa de hipertensão secundária, a pressão arterial deve ser monitorada e a hipertensão tratada clinicamente quando identificada, com o objetivo de retornar essa pressão à normalidade.
- ❖ Pesquise e trate os distúrbios eletrolíticos, como hipocalemia e hiperfosfatemia.
- ❖ Avalie a proteinúria renal – uma anormalidade que, além de desempenhar um papel na progressão da doença, demonstrou ser um indicador negativo de sobrevida.<sup>62-64</sup> Proteinúria persistentemente elevada (RPC > 0,4) de origem renal merece intervenção terapêutica.
- ❖ Monitore o paciente quanto à presença de anemia – uma alteração que, além de ser comum na doença renal crônica, é um indicador negativo de sobrevida.<sup>63,64</sup> Uma anemia de moderada a grave justifica o tratamento.
- ❖ Proceda à realização de urinálise e urocultura (quando indicadas com base no sedimento urinário, nos sinais clínicos ou na densidade urinária baixa) para monitorar a existência de infecção do trato urinário, mais comum em gatos com doença renal crônica.<sup>65</sup> A densidade urinária baixa é considerada um possível fator de aumento no risco de infecção do trato urinário subclínica, mesmo em caso de sedimento urinário inativo.<sup>66</sup>
- ❖ Ao prescrever terapias aos pacientes com doença renal crônica (p. ex., mirtazapina, gabapentina, fluoroquinolonas por via oral), deve-se ter em mente que a disfunção renal pode exigir a redução da dose ou a alteração do intervalo entre as doses.<sup>67,68</sup>
- ❖ Uma vez estabilizado o paciente, continue a monitorá-lo a cada 3-6 meses ou com mais frequência se indicado, dependendo dos fatores de cada paciente individualmente.
- ❖ Equilibre a qualidade de vida com as intervenções terapêuticas para elaborar um plano que funcione para os clientes e pacientes.

### Hipertireoidismo

O hipertireoidismo afeta 10% dos gatos com mais de 10 anos de idade.<sup>69</sup> É tratável (e até mesmo curável), se detectado precocemente. O hipertireoidismo felino é diagnosticado por meio de uma combinação de sinais clínicos (p. ex., perda de peso, polifagia, poliúria, polidipsia, vocalização excessiva, agitação, aumento da atividade, vômitos, diarreia, más condições da pelagem, apatia, inapetência e letargia)<sup>70</sup> e concentração sérica elevada do hormônio tireoidiano (T4). A identificação de oscilações no T4 é uma medida valiosa para estabelecer um diagnóstico precoce de hipertireoidismo felino. Os mitos comuns em relação ao tratamento e controle do hipertireoidismo felino são dissipados na Tabela 3. Para obter informações detalhadas sobre as opções terapêuticas, consulte as '2016 AAFP Guidelines for the Management of Feline Hyperthyroidism' (Diretrizes da AAFP de 2016 para o Tratamento do Hipertireoidismo Felino).<sup>70</sup>

### Diabetes mellitus

O diabetes mellitus é uma endocrinopatia comum em gatos idosos. A maioria dos casos é semelhante ao diabetes tipo II em seres humanos, especialmente em gatos com mais de 10 anos de idade, em que a destruição das células betapancreáticas e a resistência insulínica periférica constituem a doença subjacente.<sup>71,72</sup> O uso de corticosteroides pode predispor os animais sensíveis.

O manejo nutricional com alimentos úmidos com baixo teor de carboidratos e alto teor de proteínas pode ajudar esses pacientes caso eles estejam receptivos.<sup>73</sup> A maioria dos gatos diabéticos é insulino dependente no momento do diagnóstico. Quanto mais rápido a glicemia do gato se normalizar, maior será a probabilidade de remissão clínica.<sup>74</sup> Outros fatores associados a uma maior probabilidade de remissão são glicemia mais baixa no momento do diagnóstico, ausência de hipercolesterolemia, glicemia média de 12 horas mais baixa no dia 17 de tratamento e fator de crescimento insulinosímil mais alto em 1-3 semanas após o diagnóstico.<sup>75</sup> As insulinas de ação prolongada podem ajudar a alcançar esse objetivo.<sup>74</sup> A presença de doenças concomitantes, como a pancreatite, afeta a remissão clínica e o controle glicêmico. A insuficiência pancreática exócrina pode ocorrer como uma comorbidade em gatos diabéticos.<sup>76</sup>

Em alguns pacientes, pode ser difícil monitorar o gato diabético com curvas glicêmicas intra-hospitalares.<sup>77-79</sup> A frutossamina avalia o controle glicêmico sérico em intervalos de tempo mais prolongados e pode diferenciar entre diabetes mellitus e hiperglicemia de estresse. Monitores contínuos de glicose foram disponibilizados recentemente e, com a possibilidade de monitoramento da HbA1c (hemoglobina glicada ou glicosilada) felina no futuro, eles poderão facilitar o controle do diabetes em casa.

Para obter mais informações, consulte as 'ISFM Consensus Guidelines on the Practical Management of Diabetes Mellitus in Cats'<sup>80</sup> (Diretrizes de Consenso da ISFM sobre o Manejo Prático do Diabetes Mellitus em Gatos) e o 'AAFP Diabetes Educational Toolkit' (Material Informativo sobre Diabetes da AAFP).<sup>81</sup>

**Tabela 3** Mitos e verdades a respeito do tratamento e manejo do hipertireoidismo felino

| MITO                                                                                                                                                                          | VERDADE                                                                                                                                                                                                                                       |
|-------------------------------------------------------------------------------------------------------------------------------------------------------------------------------|-----------------------------------------------------------------------------------------------------------------------------------------------------------------------------------------------------------------------------------------------|
| O tratamento do hipertireoidismo felino causa doença renal                                                                                                                    | O excesso de T4 aumenta a taxa de filtração glomerular (TFG). O tratamento eficaz do hipertireoidismo felino diminui a TFG, revelando doença renal crônica preexistente                                                                       |
| Gatos com níveis de creatinina dentro dos intervalos de referência não têm doença renal crônica                                                                               | O aumento da TFG e a perda de massa muscular associados ao hipertireoidismo felino causam uma diminuição da creatinina, mesmo se um gato tiver doença renal crônica                                                                           |
| A manutenção do T4 um pouco acima dos intervalos de referência ajudará os pacientes com doença renal crônica                                                                  | Até mesmo os leves aumentos no T4 podem causar ou exacerbar danos glomerulares                                                                                                                                                                |
| O T4 pós-tratamento abaixo do intervalo de referência não causa danos aos gatos. O paciente não se encontra hipotireóideo contanto que o T4 esteja no intervalo de referência | O hipotireoidismo iatrogênico pode causar a progressão da doença renal crônica e encurtar o tempo de vida. Os gatos podem desenvolver hipotireoidismo clinicamente significativo, mesmo se o T4 estiver dentro do intervalo de referência     |
| O isolamento após o tratamento com iodo radioativo ( <sup>131</sup> I) é extremamente estressante em um gato                                                                  | Embora 1 semana longe de casa envolva algum estresse, o tratamento com <sup>131</sup> I é muito melhor do que o estresse associado à doença em si, além da medicação constante e dos exames de sangue frequentes                              |
| <sup>131</sup> I tem um custo altíssimo                                                                                                                                       | O custo de todas as opções de tratamento por 1 ano é basicamente o mesmo. Ao longo da vida do gato, o custo do <sup>131</sup> I é significativamente menor do que o custo de complicações da doença, medicação vitalícia ou dietas prescritas |

A constipação é um problema comum que afeta os gatos mais idosos. Sua etiologia é provavelmente multifatorial.

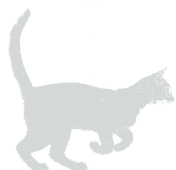

Quadro 3

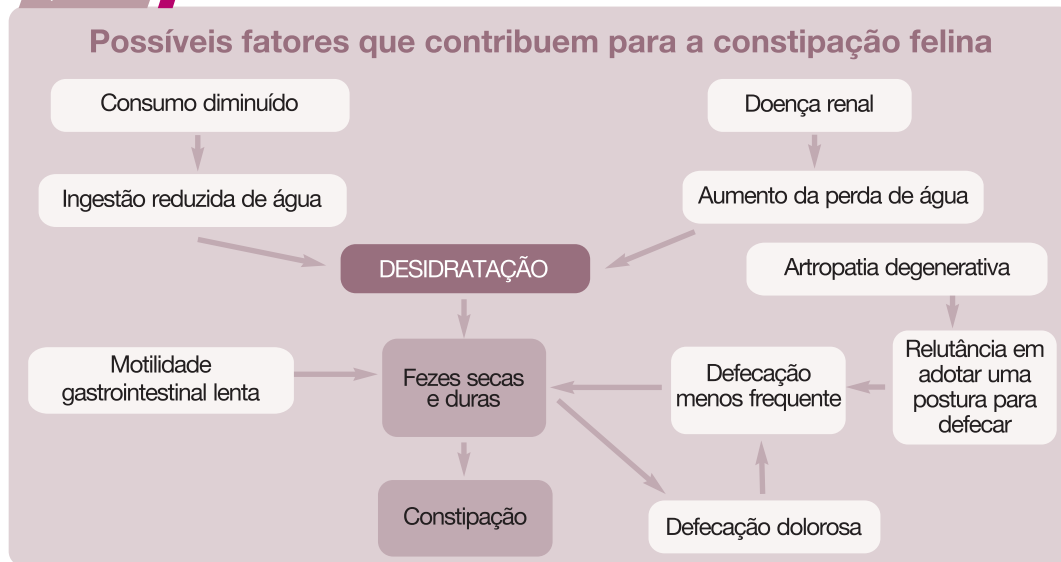

### Distúrbios odontológicos

Apesar de serem uma condição comum, os distúrbios odontológicos são subdiagnosticados no paciente felino.<sup>51</sup> Até 70% dos gatos apresentarão algum tipo de problema odontológico antes dos 2 anos de idade.<sup>51</sup> Em pacientes com mais de 7 anos, as formas comuns de distúrbios odontológicos incluem doença periodontal, reabsorção dentária, tumores bucais e doenças sistêmicas com manifestações bucais (p. ex., doença renal crônica, diabetes mellitus).<sup>47</sup> A idade se correlaciona significativamente com a incidência de doença periodontal<sup>48</sup> e reabsorção dentária.<sup>49,50</sup>

A Força-Tarefa considera os seguintes pontos como prioridades no que diz respeito aos distúrbios odontológicos e ao gato idoso:

- ✦ Nunca considere a idade avançada por si só como uma barreira para prestar um atendimento odontológico ideal.
- ✦ As radiografias dentárias é um dos principais componentes dos cuidados odontológicos em gatos,<sup>51,82</sup> incluindo:
  - Radiografia dentária de boca inteira antes da elaboração de um plano terapêutico.
  - Radiografias dentárias pós-cirúrgicas para garantir a extração cirúrgica adequada e registrar o local da extração (ou seja, assegurar a extração total da raiz, documentar o grau de amputação da coroa dentária, identificar o estado do osso alveolar secundariamente às técnicas de extração).<sup>51</sup>
- ✦ Utilize analgesia apropriada no pré, intra e pós-operatório.
- ✦ Use escalas de dor para avaliar o sucesso da analgesia (p. ex., Feline Grimace Scale<sup>83</sup>).

### Doença gastrointestinal

Com o envelhecimento, ocorrem alterações em todos os sistemas corporais, e algumas das alterações mais acentuadas acontecem no trato gastrointestinal (GI). Mudanças na motilidade faríngea, esofágica e gastrointestinal, bem como alterações no pH gástrico, levam a uma modificação na microbiota GI, resultando em diminuição da digestibilidade e perda de peso progressiva.<sup>84</sup> A perda de peso pode ser o único sinal de doença do sistema digestivo em gatos. A constipação também é um problema gastrointestinal comum que afeta os gatos mais idosos.<sup>84,85</sup> Sua etiologia é provavelmente multifatorial. A hipocalcemia pode contribuir para a lentidão da motilidade gastrointestinal<sup>85</sup>, e a constipação pode ser um indicador de hipercalcemia.<sup>86</sup> A dor postural para evacuar fezes duras e secas potencializa o problema (Quadro 3). Tabelas de escore fecal podem ser utilizadas para a avaliação das fezes.

Enteropatia inflamatória, neoplasia, pancreatite ± triade felina, insuficiência pancreática e parasitismo são considerações comuns para a perda de peso na ausência de outros sinais clínicos. Para obter o diagnóstico definitivo, é necessária uma investigação mais aprofundada, além dos exames laboratoriais basais (iniciais). Os testes diagnósticos adicionais incluem não só ultrassonografia abdominal, mas também medição sérica da imunoreatividade da lipase pancreática felina (fPLI), imunoreatividade semelhante à da tripsina (TLI), cobalamina e folato. O diagnóstico de pancreatite não pode ser feito apenas por meio de ultrassonografia ou exames de sangue isoladamente; quando realizados em conjunto, no entanto, eles podem aumentar a probabilidade de um diagnóstico correto.<sup>87</sup> Da mesma forma, o resultado negativo em exames coprológicos quanto à presença de parasitas não deve ser superinterpretado – esse resultado significa apenas que nenhum parasita estava presente na amostra enviada.

## Câncer

Conforme os gatos envelhecem, o risco de câncer (também conhecido como neoplasia maligna) aumenta.<sup>88</sup> Os sinais geralmente são inespecíficos, como perda do apetite, perda de peso ou letargia. O uso de técnicas amigáveis aos gatos com palpação suave e delicada pode ajudar a melhorar a qualidade das informações obtidas pelo médico-veterinário. Fique atento aos quadros de caquexia e alopecia paraneoplásica.

Até 50 por cento das massas cutâneas felinas são malignas ao exame histopatológico<sup>89</sup> (comumente mastocitomas, carcinomas de células escamosas, melanomas, fibrossarcomas), e o diagnóstico deve ser feito no momento em que são detectados, pois o diagnóstico tardio pode levar a um prognóstico mais desfavorável em função da possibilidade de crescimento e/ou da ocorrência de metástase. Incentivar os tutores a examinar todos os gatos mensalmente em busca de massas cutâneas, registrando a localização e o tamanho, pode permitir a detecção mais precoce.

Muitas neoplasias malignas podem ser tratadas ou amenizadas, sobretudo se detectadas precocemente. Trabalhar em parceria com um oncologista trará ao clínico opções terapêuticas atualizadas.

Abordar os objetivos da terapia com os tutores ajudará a orientar as recomendações. Houve um grande avanço com os quimioterápicos, a radioterapia e as terapias fotodinâmicas, bem como com as técnicas cirúrgicas, levando a uma redução significativa no tempo de remissão e um aumento na satisfação do tutor. Muitas neoplasias malignas podem ser tratadas de forma paliativa com intervenções menos agressivas, retardando o crescimento e controlando os sintomas (p. ex., dor, náuseas) para manter o bem-estar. A orientação do cliente envolve uma conversa sobre a qualidade de vida e as opções de tratamento disponíveis. A via ou modalidade terapêutica pode ser modificada em alguns casos para se adequar melhor ao paciente e/ou ao tutor. Fornecer informações sobre as variações de resposta à terapia, avaliar a aceitação do gato aos esquemas terapêuticos e estimar os custos ajudarão os tutores a tomar as decisões terapêuticas mais adequadas para o seu gato e para eles mesmos.

## Fontes contínuas de dor

Muitas das condições abordadas nessas Diretrizes envolvem um componente de dor. A dor deve ser investigada e controlada como uma doença por si só e tratada concomitantemente com o(s) distúrbio(s) primário(s). Embora a avaliação de dor crônica em gatos seja um desafio, nossa capacidade de fazer isso está melhorando em ritmo acelerado.<sup>90</sup> Existem várias causas de dor contínua em gatos idosos (ver Quadro 4), e a percepção de dor pode aumentar quando há mais de um distúrbio presente, em virtude da amplificação do sistema sensorial da dor. É importante abordar não só os quadros de artropatia degenerativa, mas também as dores de origem tecidual (i. e., dos tecidos moles), inflamatória ou neurológica, pois constituem uma causa frequente de desconforto contínuo em gatos idosos.

A artropatia degenerativa, como o próprio nome diz, é uma doença degenerativa crônica que afeta o esqueleto apendicular e axial.<sup>91</sup> Sua prevalência está fortemente relacionada com a idade, afetando até 74% dos gatos com 12 anos ou mais.<sup>91,92</sup> A doença

## Quadro 4

### Condições comumente associadas à dor prolongada

- ✦ Artropatia degenerativa
- ✦ Distúrbios odontológicos
- ✦ Condições neurológicas – alteração em região lombossacra, discopatia, cervicgia
- ✦ Dor de origem miofascial e dos tecidos moles
- ✦ Afecções dermatológicas – dermatite, otite, feridas recalcitrantes
- ✦ Doenças oculares – úlceras de córnea, uveíte, glaucoma
- ✦ Envolvimentos viscerais – enteropatia inflamatória, pancreatite, megacólon, constipação, cistite idiopática
- ✦ Câncer – relacionada com algum tumor primário ou com o tratamento (p. ex., queimaduras por radiação)
- ✦ Dor pós-operatória persistente – onicectomia, mastectomia, amputação de membro

Existem  
várias causas  
de dor contínua  
em gatos idosos,  
e a percepção  
de dor pode  
aumentar quando  
há mais de um  
distúrbio  
presente.

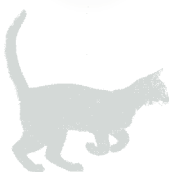

apresenta múltiplas facetas; alterações periféricas e centrais resultam em uma dor mal-adaptativa. A dor mal-adaptativa não tem nenhuma utilidade (ou seja, não é protetora) e pode ser subdividida em dor neuropática (dano direto ao tecido neurológico) e dor funcional (disfunção do sistema nociceptivo).<sup>93</sup>

Muitos gatos com artropatia degenerativa não são diagnosticados nem tratados. O diagnóstico envolve não só o uso de questionários para o cliente<sup>94-96</sup> e a obtenção do histórico clínico, mas também a realização de exames ortopédico, neurológico e miofascial no paciente, além da aquisição de radiografias e, em alguns casos, a avaliação da resposta a um ensaio terapêutico. Ferramentas de triagem clinicamente convenientes e aconselháveis aumentarão a probabilidade de identificação dos gatos acometidos; uma dessas ferramentas consiste em seis perguntas (Quadro 5).<sup>97</sup> A resposta à pergunta “Como seu gato está saltando para cima e para baixo, em comparação com o ano passado?” pode alertar o médico-veterinário sobre a necessidade ou não de prosseguir com uma avaliação de artropatia degenerativa. Um recurso completo e abrangente para médicos-veterinários e tutores de gatos é o FMPI (do inglês *Feline Musculoskeletal Pain Index*, Índice de Dor Musculoesquelética Felina; [painfreecat.org](http://painfreecat.org)).

## Quadro 5

### Checklist do tutor para a detecção de dor associada à artropatia degenerativa em gatos

Para determinar se o seu gato está apresentando sinais de dor associada à artropatia degenerativa, preencha o seguinte questionário. Por favor, responda a todas as perguntas.

|                                                                |                              |                              |
|----------------------------------------------------------------|------------------------------|------------------------------|
| ✦ Seu gato salta para cima normalmente?                        | <input type="checkbox"/> SIM | <input type="checkbox"/> NÃO |
| ✦ Seu gato salta para baixo normalmente?                       | <input type="checkbox"/> SIM | <input type="checkbox"/> NÃO |
| ✦ Seu gato sobe escadas ou degraus normalmente?                | <input type="checkbox"/> SIM | <input type="checkbox"/> NÃO |
| ✦ Seu gato desce escadas ou degraus normalmente?               | <input type="checkbox"/> SIM | <input type="checkbox"/> NÃO |
| ✦ Seu gato corre normalmente?                                  | <input type="checkbox"/> SIM | <input type="checkbox"/> NÃO |
| ✦ Seu gato persegue objetos em movimento (p. ex., brinquedos)? | <input type="checkbox"/> SIM | <input type="checkbox"/> NÃO |

De Enomoto et al<sup>97</sup> Baseado no Musculoskeletal Pain Screening Checklist (MIPSC) © 2019 North Carolina State University

Atualmente, a artropatia degenerativa não tem cura e exige tratamento por toda a vida para manter o conforto, a mobilidade e a qualidade de vida. Com isso, vêm os desafios relacionados com a relutância e baixa adesão do tutor, os efeitos adversos da medicação de longo prazo, as interações medicamentosas e o impacto das comorbidades. A complexa etiologia da dor relacionada com a artropatia degenerativa exige uma abordagem multimodal e integrada, envolvendo terapias farmacológicas e não farmacológicas, além de modificações ambientais.

Os médicos-veterinários prescrevem uma grande variedade de fármacos e suplementos para gatos com artropatia degenerativa, apesar de haver uma base limitada de evidências para muitos.<sup>93</sup> Os medicamentos com eficácia publicada incluem anti-inflamatórios não esteroides (AINEs),<sup>9,8</sup> gabapentina<sup>99</sup> e tramadol,<sup>100,101</sup> no entanto, a maioria dos estudos foi projetada para analisar a monoterapia. Aproximadamente 68% dos gatos com artropatia degenerativa apresentam algum grau de doença renal crônica,<sup>102</sup> tornando controverso o uso de AINEs nessa população de animais. Estudos retrospectivos não mostraram nenhum efeito adverso na função renal (avaliação sequencial da concentração sérica de creatinina e densidade urinária) ou na longevidade em gatos com doença renal crônica estável (estágios 1-3, segundo a IRIS) submetidos ao meloxicam em uma dose diária mediana de 0,02 mg/kg.<sup>103,104</sup> Nenhum efeito adverso foi relatado em gatos com doença renal crônica (estágios 1-2, segundo a IRIS) que receberam o robenacoxibe na dose de 1,0-2,4 mg/kg a cada 24 horas por 28 dias em um estudo prospectivo.<sup>105</sup> Contudo, um estudo prospectivo recente (meloxicam a 0,02 mg/kg a cada 24 horas por 6 meses ou placebo) em gatos com doença renal crônica relatou uma RPC mais alta em 6 meses naqueles tratados com o meloxicam.<sup>106</sup> Tratamentos emergentes (p. ex., anticorpos monoclonais antifator de crescimento de nervos específicos para felinos) abordam o componente neuropático da doença e superam os problemas de tratamentos diários, porque são administrados por via subcutânea uma vez a cada 4-6 semanas.<sup>107</sup>

A dor de origem tecidual (i. e., dos tecidos moles) ocorre com uma restrição da mobilidade dos tecidos relacionada com vários estados patológicos (p. ex., artropatia degenerativa, estados de dor orovisceral e lesão direta às estruturas de tecidos moles). A palpação miofascial avalia a viscosidade e mobilidade teciduais, mas elicia uma resposta do gato (p. ex., vocalização, giro ou rotação do corpo, tentativa de escape ou fuga) na presença de dor. Os tecidos moles ficam restritos quando o movimento é reduzido ou há inflamação. Exercícios, massagens, acupuntura, terapia por ondas de choque e vibração são os tratamentos definitivos para a restrição dolorosa dos tecidos moles.

A dor de origem neurológica é comum nos gatos em processo de envelhecimento, especialmente nas regiões lombossacra e pélvica da medula espinal. Esse tipo de dor costuma ser mal-adaptativa e difícil de tratar. As condições neurológicas podem permanecer localizadas ou vir acompanhadas de dor e disfunção de estruturas viscerais somaticamente relacionadas (p. ex., disfunção colônica e megacólon com doença lombossacra).<sup>108,109</sup>

A dor de origem inflamatória é uma característica de muitas doenças felinas. Os gatos em processo de envelhecimento parecem sofrer alterações intensificadas em seu sistema

imunológico, o que pode predispor-los a comorbidades.

**A complexa etiologia da dor relacionada com a artropatia degenerativa exige uma abordagem multimodal e integrada, envolvendo terapias farmacológicas e não farmacológicas, além de modificações ambientais.**

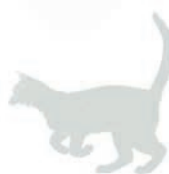

### Síndrome de disfunção cognitiva

Os gatos em processo de envelhecimento geralmente exibem vocalização excessiva, alteração nas interações sociais ou nos padrões de atividade e eliminação em locais inadequados.<sup>110-112</sup> Em mais de 25% dos gatos com 11 anos de idade ou mais, essas alterações não têm uma causa clínica reconhecida.<sup>111,112</sup> Como as motivações felinas podem estar ocultas, há muitas diferenças entre os gatos e dentro do mesmo gato; além disso, as alterações aparecem gradualmente e mimetizam respostas adaptativas à dor crônica.<sup>114</sup> Por essa razão, os tutores e médicos-veterinários podem atribuir a culpa da síndrome de disfunção cognitiva “apenas ao fato de ser um gato idoso”. Se os médicos-veterinários recomendarem fortemente aos tutores que estes registrem e revejam as fotos e os vídeos das rotinas diárias de seus gatos de uma forma sequencial, as alterações para cada gato se tornarão aparentes mais cedo. O acrônimo DISHA-AL, formado com as letras iniciais das alterações em inglês (Quadro 6), é utilizado para descrever os sinais clínicos de declínio cognitivo. A realização de perguntas provocativas (Quadro 7) para identificar os componentes do DISHA-AL e a subsequente avaliação clínica podem diferenciar entre um declínio clínico e cognitivo. Em última análise, a síndrome de disfunção cognitiva é um diagnóstico de exclusão de causas clínicas e ambientais de distúrbios de comportamento.<sup>9,112</sup>

#### Quadro 6

##### Componentes do acrônimo DISHA-AL da síndrome de disfunção cognitiva

- ❖ Desorientação
- ❖ Interação social alterada
- ❖ Alterações do ciclo de sono-vigília
- ❖ Higiene inadequada (evacuação domiciliar em locais inapropriados)
- ❖ Mudanças nos níveis de atividade
- ❖ Ansiedade
- ❖ Déficits de aprendizagem/memória

Cortesia da GM Landsberg

#### Quadro 7

##### Dez perguntas provocativas para a investigação de possível síndrome de disfunção cognitiva

- ❖ Qual é a superfície mais alta em que seu gato pula? Seu gato parece mancar?
- ❖ Quando foi a última vez que você viu seu gato se espreguiçar e bocejar de maneira exuberante?
- ❖ Seu gato urinou ou defecou fora da bandeja sanitária desde o último exame?
- ❖ As interações de seu gato com os companheiros da casa mudaram?
- ❖ Seu gato está mais indiferente/distante ou mais apegado/afetuoso com você do que antes?
- ❖ Seu gato “fala” (vocaliza), mia insistentemente ou uiva (grita) sem motivo aparente?
- ❖ Os hábitos de lambedura e sono de seu gato mudaram?
- ❖ Os hábitos de ingestão de alimento e água de seu gato mudaram?
- ❖ Seu gato mostra disposição para brincar ou caçar se tiver oportunidade?
- ❖ Com que frequência seu gato se mostra confuso, esquecido ou deprimido?

Se uma conduta terapêutica que integra orientação do cliente, enriquecimento do ambiente<sup>8,9,115</sup> (ver mais adiante na Tabela 5), suplementos com ácidos graxos essenciais, antioxidantes e vitaminas do complexo B,<sup>116-118</sup> e feromônios<sup>119</sup> não trouxer melhorias, a administração de selegilina (0,25-1 mg/kg a cada 24 horas) pode ser benéfica.<sup>120,121</sup> A terapia combinada individualizada é mais eficaz e pode melhorar a função cerebral, a longevidade e a tranquilidade do tutor.<sup>9</sup>

## Manejo de doenças complexas

As comorbidades são comuns em gerontologia, e os gatos se parecem muito com os seres humanos nessa tendência a exibir tais comorbidades.<sup>122</sup> As razões para a alta frequência de comorbidades conforme os gatos envelhecem permanecem especulativas, mas isso provavelmente está relacionado com uma combinação de danos oxidativos induzidos por estresse exógeno, exposição a agentes infecciosos ao longo do tempo, e desequilíbrio do sistema imunológico.<sup>123,124</sup> À medida que a homeostase desse sistema imunológico oscila, a imunossenescência (sensibilidade reduzida a patógenos externos) e a hipervigilância de tecidos autólogos podem ocorrer simultaneamente e, algumas vezes, são chamadas de alterações "senis inflamatórias".<sup>125</sup>

Embora uma discussão específica sobre o envelhecimento inflamatório esteja basicamente restrita à literatura gerontológica humana, a Força-Tarefa considera que o conceito de fragilidade ajuda a captar um componente das condições complexas que podem coalescer no gato. O conceito de "modelo de prevenção da fragilidade" traça três níveis de intervenção: 1) primária - ou seja, minimizar os fatores de risco e o aparecimento de doenças; 2) secundária - retardar a progressão de doenças; e 3) terciária - reduzir ou limitar os déficits, as incapacidades e as complicações decorrentes de doenças. No momento em que os gatos entram na fase idosa, os primeiros dois níveis já ficaram para trás. O foco agora está na terceira categoria de redução e limitação de déficits.

O objetivo de um envelhecimento saudável sempre esteve conosco desde uma época em que os gatos raramente chegavam à fase idosa. Agora que se alcançou um avanço considerável no aumento da longevidade, é importante focar na qualidade dessa longevidade. Embora o envelhecimento saudável signifique coisas distintas para diferentes pessoas em relação a si mesmas e a seus gatos, e a perspectiva de envelhecimento saudável muitas vezes muda com o tempo e as circunstâncias, é provável que o conforto e o prazer de viver sejam alvos comuns. Também é importante reconhecer que as expectativas de um tutor em relação a um gato refletirão sua própria postura no que diz respeito ao envelhecimento saudável de si mesmo. À medida que os gatos envelhecem, há um aumento no risco de desenvolver mais de uma doença, e isso muitas vezes dificulta o diagnóstico e o tratamento. O diagnóstico é auxiliado por uma combinação de exame físico completo, exames de triagem e atenção às comorbidades comuns listadas no Quadro 8.

Conforme o número de doenças concomitantes aumenta, ocorre uma diminuição correspondente na qualidade de vida relacionada com a saúde.<sup>140</sup> Alguns dos problemas que surgem em gatos idosos com várias doenças incluem:

- ❖ O efeito da polifarmácia e o risco de interações

**As razões para a alta frequência de comorbidades conforme os gatos envelhecem provavelmente está relacionado com uma combinação de danos oxidativos induzidos por estresse exógeno, exposição a agentes infecciosos ao longo do tempo, e desequilíbrio do sistema imunológico.**

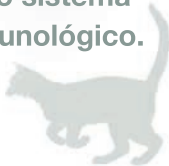

medicamentosas. O declínio da depuração renal ou hepática pode exigir uma redução nas doses ou um aumento nos intervalos das medicações.<sup>141</sup>

- ❖ A relutância e a baixa adesão do tutor ao plano terapêutico, sobretudo nos casos em que há uma alta carga de medicamentos, com o risco de afetar negativamente o vínculo entre o gato e o tutor.

- ❖ O efeito da dieta sobre a condição corporal, a homeostase inflamatória e o estado geral de saúde, bem como sobre as funções gastrointestinal e renal.

- ❖ O impacto cumulativo de várias doenças. Por exemplo, doença renal crônica, artropatia degenerativa, diabetes mellitus, enteropatia inflamatória, síndrome de disfunção cognitiva e distúrbios de comportamento, quando presentes em qualquer combinação, podem dificultar um diagnóstico adequado por exclusão.

- ❖ A hipertensão arterial pode ocorrer com diversos estados patológicos (tireóideos, cardíacos, renais), e isso é muito mais comum do que se reconhecia anteriormente.

- ❖ O risco de diagnosticar uma doença sem levar outra em conta ou, então, de presumir que uma única doença é grave quando os sinais são, na verdade, atribuídos a várias doenças. Por exemplo:

- Na ocorrência concomitante de colangite, pancreatite e/ou enteropatia inflamatória, uma ou mais dessas doenças podem passar despercebidas.<sup>142</sup>

- A pancreatite crônica pode não ser notada em um paciente diabético.<sup>76,143</sup>

- O hipertireoidismo pode não ser detectado em gatos com doença renal ou hepática ou com câncer, porque os sinais típicos são mascarados e o T4 pode ser suprimido e retornar ao limite da faixa normal.<sup>144,145</sup>

- Também se pode passar por alto quanto à presença

### Quadro 8

#### Combinações de doenças felinas comumente reconhecidas

- ❖ Doença renal crônica + hipertireoidismo
- ❖ Doença renal crônica + artropatia degenerativa<sup>102</sup>
- ❖ Doença renal crônica + insuficiência cardíaca<sup>126</sup>
- ❖ Doença renal crônica + doença periodontal<sup>127,128</sup>
- ❖ Hipertireoidismo + diabetes mellitus<sup>129</sup>
- ❖ Diabetes mellitus + obesidade<sup>130†</sup>
- ❖ Diabetes mellitus + doença renal crônica<sup>131</sup>
- ❖ Diabetes mellitus + hiperadrenocorticism<sup>132†</sup>
- ❖ Diabetes mellitus + distúrbios do trato urinário inferior<sup>133</sup>
- ❖ Diabetes mellitus + infecções do trato urinário + hipertireoidismo + doença renal crônica<sup>85</sup>
- ❖ Obesidade + artropatia degenerativa/diabetes mellitus/ cardiopatia/doença respiratória<sup>36,134</sup>
- ❖ Tríade felina<sup>135,136†</sup>
- ❖ Hipertensão arterial + hipertireoidismo
- ❖ Hipertensão arterial + doença renal crônica
- ❖ Hipertensão arterial + hiperaldosteronismo
- ❖ Doença renal crônica + condição corporal magra/ doença periodontal/cistite<sup>137</sup>
- ❖ Subpeso + artropatia degenerativa/diabetes mellitus/ doença renal crônica/hipertireoidismo/ neoplasia<sup>138,139</sup>

Quadro elaborado com base em Scherk<sup>123</sup>

† Essas revisões aparecem em uma edição especial virtual do JFMS sobre comorbidades felinas, a qual aborda as complexidades de diagnóstico e tratamento, disponível em [cpsj.jfms.com](http://cpsj.jfms.com)

**A presença de múltiplas doenças também pode ser devastadora para os clientes, e um elemento importante da prestação do atendimento veterinário envolve o apoio ao tutor.**

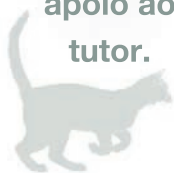

### Quadro 9

#### Dicas para apoiar o tutor de gatos acometidos por várias doenças

- ✦ Concentre-se primeiro na doença com maior impacto sobre a qualidade de vida. As classificações são dinâmicas, e a doença que representa a maior ameaça à qualidade de vida pode mudar com o passar do tempo.
- ✦ Leve em conta a quantidade, o custo e a conformidade do tutor em relação ao fornecimento da medicação. Oriente os clientes sobre como administrar e programar os medicamentos, perguntando sobre suas habilidades e limitações.
- ✦ Pode ser difícil a administração de vários tratamentos, tanto para o paciente como para o cliente; é importante que a qualidade do vínculo (elo) homem-animal seja mantida. Instrua os clientes sobre como administrar os medicamentos de uma forma tranquila e cômoda para o gato.
- ✦ Explore o uso de pastas, petiscos favoritos ou petiscos especificamente elaborados para esconder comprimidos ou, alternativamente, a reformulação de medicamentos orais em petiscos, líquidos ou pastas. Nunca coloque medicamentos em uma dieta de prescrição, pois o gato pode rejeitar esse alimento.
- ✦ Pesquise se a dosagem pode ser feita uma vez ao dia e não duas ou mais vezes ao dia, alterando a dose ou a formulação do produto. Alguns tutores consideram que a aplicação de injeções subcutâneas é mais fácil do que a administração de medicamentos orais.
- ✦ Pouquíssimos fármacos felinos são eficazes quando aplicados por via transdérmica. Muitas farmácias de manipulação oferecem uma variedade de medicamentos para essa finalidade; entretanto, há pouca ou nenhuma evidência para demonstrar a eficácia. Dois medicamentos comumente utilizados em gatos idosos, a mirtazapina e o metimazol, são mensuráveis e confiáveis quando administrados por via transdérmica.<sup>146,147</sup>

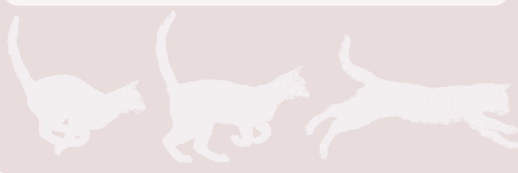

de hipertireoidismo em gatos com diabetes mellitus, em função da semelhança dos sinais.

- O diagnóstico de bacteriúria em gatos com doença renal, hipertireoidismo ou diabetes pode ser complicado, uma vez que os sinais de doença do trato urinário inferior, piúria e/ou sedimento urinário ativo nem sempre estão presentes. O diagnóstico só pode ser confirmado pela realização de urinálise e cultura bacteriana.<sup>65</sup>

- Os quadros de hipertireoidismo e cardiopatia podem ocorrer concomitantemente, mas apenas um deles é identificado.

- A maioria das doenças tem um componente de dor, dificultando a avaliação de outras fontes de dor, como dores de origem articular (artropatia degenerativa), tecidual (i. e., dos tecidos moles) ou neurológica, quando se utilizam escalas de dor padronizadas. O exame miofascial é uma solução parcial para esse dilema diagnóstico.

- O impacto das comorbidades sobre a qualidade de vida varia (p. ex., durante a quimioterapia, as náuseas podem ser piores que a dor).

✦ A gravidade da dor mudará ao longo da vida do gato, dependendo da doença e sua progressão, da resposta ao tratamento, do estado inflamatório e das modificações no estilo de vida. O manejo de doenças complexas pode ser algo avassalador para um clínico geral; muitas vezes, no entanto, é mais indicado supervisionar o tratamento do gato (uma vez que o clínico tem uma "visão geral" do quadro), estabelecer um bom relacionamento com o tutor e ter a possibilidade de consultar especialistas ou encaminhar o gato a algum deles, quando necessário. A presença de múltiplas

doenças também pode ser devastadora para os clientes, e um elemento importante da prestação do atendimento veterinário envolve o apoio ao tutor (ver Quadro 9).

As terapias auxiliares incluem o enriquecimento e a modificação do ambiente, bem como o uso de medicina física, como fisioterapia, acupuntura, massagem e modalidades eletrofísicas. Muitas formas positivas de atividade podem ser instituídas em casa, e a participação regular em sessões de medicina física em um estabelecimento pode ser recompensadora tanto para o gato como para o seu tutor. Envolver o tutores como um dos integrantes da equipe responsável pelo tratamento e fazê-los sentir como parte da solução promovem sua adesão e conformidade; isso também aumenta o tempo em que o gato e seu tutor passam juntos. Atribuir aos tutores tarefas que mantenham interações positivas, como práticas de higiene e brincadeiras, diminuirá o risco de o gato associar o tutor apenas ao tratamento.

Exercícios controlados – quando realizados com as restrições, a continuidade e a regularidade adequadas – produzem analgesia, semelhantemente a um analgésico.<sup>148</sup> A atividade física regular traz vários benefícios, pois influencia na motilidade gástrica e colônica, equilibra o estado imunológico e reduz o aparecimento de crises, além de melhorar o apetite e a cognição.<sup>149</sup>

Como muitas das condições que coalescem em gatos idosos estão provavelmente relacionadas com desequilíbrios na homeostase neuroimune, é importante priorizar uma abordagem que enfatize a qualidade de vida e o uso de tratamentos não farmacológicos, juntamente com tratamentos farmacológicos e monitoramento apropriado.

Qualidade de vida

“Como saberei se chegou a hora dele?” é uma das perguntas mais frequentes dos tutores. Ajudar os tutores a tomar a decisão de submeter seu gato à eutanásia é uma parte essencial do nosso trabalho. As comorbidades e seus tratamentos, bem como os desafios físicos relacionados com o envelhecimento, afetam a qualidade de vida. Mais intervenções terapêuticas e procedimentos cirúrgicos radicais estão disponíveis atualmente para prolongar a vida, mas devemos colocar os interesses do paciente em primeiro lugar, apesar da pressão dos tutores.<sup>150</sup> Só porque podemos, não significa que devemos, e a qualidade de vida, e não a quantidade, é uma prioridade. Os gatos vivem o momento e, ao contrário das pessoas, eles não são capazes de saber que “amanhã pode ser melhor”, enquanto passam por tratamentos desagradáveis. Nossos pacientes não fazem escolhas por si próprios; isso cabe ao tutor e, por essa razão, devemos fazer uma parceria com ele para tomar decisões bem informadas e centradas no paciente.

Animais, recém-nascidos, bebês e pessoas acometidas por déficits cognitivos não conseguem fazer autorrelatos e, portanto, não é possível utilizar instrumentos para avaliação de resultados relatados por esses pacientes.<sup>151,152</sup> Apesar de seu amplo uso, o termo qualidade de vida não tem uma definição universalmente consistente ou aceita em relação aos animais, o que tem dificultado nossa capacidade de medi-la. A maioria das pessoas tem uma compreensão geral do que significa o termo qualidade de vida; no entanto, é surpreendentemente difícil verbalizá-la.<sup>153</sup> Uma definição prática consiste na “satisfação de um indivíduo com sua saúde física e psicológica, seu ambiente físico e social, bem como com sua capacidade de interagir com esse ambiente”.<sup>152</sup>

“Saúde” é o estado de estar livre de doenças ou lesões, enquanto “satisfação” é o atendimento ou cumprimento das necessidades de cada indivíduo ou um estado de ânimo ou humor positivo.<sup>152</sup> Quando a equipe veterinária compartilha seu entendimento sobre o que significa a qualidade de vida, os tutores são respaldados com uma orientação consistente para avaliar essa qualidade de vida em seus gatos.

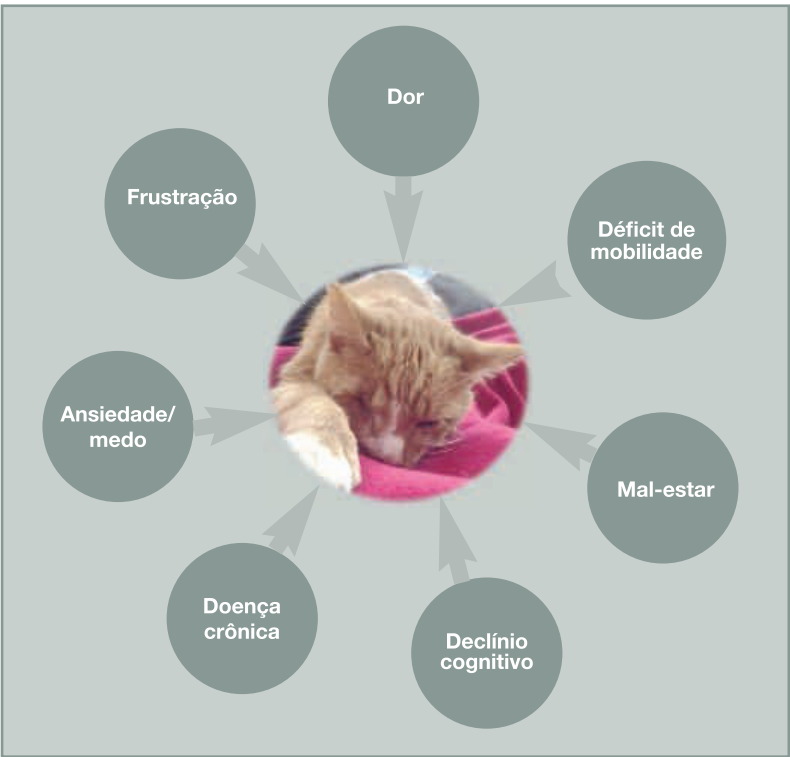

Figura 8 Considerações sobre a qualidade de vida. Cortesia de Sheilah Robertson

Como  
médicos-  
veterinários,  
devemos fazer  
uma parceria  
com os tutores  
para tomar  
decisões bem  
informadas e  
centradas no  
paciente.

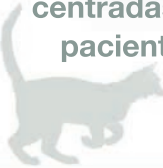

| Tabela 4 Exemplos de estados mentais/emocionais e físicos que contribuem para uma baixa qualidade de vida |                                                                                                                     |
|-----------------------------------------------------------------------------------------------------------|---------------------------------------------------------------------------------------------------------------------|
| Exemplo                                                                                                   |                                                                                                                     |
| Mental/Emocional                                                                                          | Ansiedade                                                                                                           |
|                                                                                                           | Medo                                                                                                                |
|                                                                                                           | Isolamento e solidão                                                                                                |
|                                                                                                           | Tédio                                                                                                               |
|                                                                                                           | Frustração                                                                                                          |
|                                                                                                           | Angústia                                                                                                            |
| Físico                                                                                                    | Dor crônica (mal-adaptativa) (p. ex., artropatia degenerativa, distúrbios odontológicos, feridas não cicatrizantes) |
|                                                                                                           | Náuseas e vômitos (p. ex., secundários à doença renal crônica)                                                      |
|                                                                                                           | Falta de ar (p. ex., doenças respiratórias, insuficiência cardíaca congestiva)                                      |
|                                                                                                           | Sede (p. ex., diabetes mellitus não controlado, doença renal crônica)                                               |

A qualidade de vida e a qualidade de vida relacionada com a saúde são diferentes. A qualidade de vida é um termo amplo e considera todos os aspectos da vida de um pet, o que inclui a saúde física e mental. A qualidade de vida relacionada com a saúde se refere ao impacto específico de uma condição médica na saúde de um indivíduo. Um instrumento para avaliar a qualidade de vida relacionada com a saúde é capaz de detectar doenças (i. e., ser discriminativo) e medir as alterações de saúde ao longo do tempo (i. e., ser avaliativo).<sup>154</sup>

Como podemos pegar algo interno, particular e exclusivamente individual e torná-lo acessível, objetivo e mensurável? Como observadores, não podemos relatar a intensidade da dor de um gato de forma válida, mas podemos informar mudanças comportamentais que supostamente são o resultado da dor. Portanto, a qualidade de vida só pode ser avaliada em gatos por relatórios indiretos ou observações diretas; o responsável pode ser o tutor, um profissional veterinário ou uma combinação de ambos. A isso se dá o nome de resultados relacionados com o observador.

A dor é um estado afetivo (emoção) e sempre é algo incômodo, mas não é a única sensação desagradável associada à doença crônica. Outras coisas a serem consideradas estão exibidas na Figura 8 e na Tabela 4.

Há certa urgência em desenvolver ferramentas de avaliação baseadas em evidências para esclarecer a tomada de decisão clínica. Utilizando o consenso de especialistas, as questões de bem-estar felino no Reino Unido, tanto em nível individual como populacional, foram priorizadas.<sup>155</sup> A prioridade (classificação) das questões foi determinada pela avaliação de sua gravidade e duração. Pertinente a estas '2021 AAFP Feline Senior Care Guidelines' (Diretrizes para Cuidados com Gatos Idosos da AAFP de 2021) é o fato de que, entre as 10 principais questões de bem-estar identificadas, as doenças da fase idosa foram classificadas em segundo lugar em termos de prioridade, e a eutanásia tardia foi listada em segundo lugar quanto à prevalência.<sup>155</sup>

Na medicina veterinária, questionários elaborados para o tutor e escalas de observação preenchidas pelo clínico são frequentemente utilizados para objetivar o subjetivo (i. e., tornar objetivo algo subjetivo).<sup>156</sup> Os instrumentos de avaliação de resultados devem ter atributos específicos:

✦ **Validade:** comprovada para medir o que se pretende. Isso requer uma definição aceita do que está sendo mensurado.

✦ **Confiabilidade:** estreita concordância entre diferentes observadores.

✦ **Responsividade e sensibilidade:** capacidade de detectar alterações clínicas ao longo do tempo ou após o tratamento.

O desenvolvimento de instrumentos sólidos para avaliar estados subjetivos requer metodologias psicométricas específicas – que, apesar de serem demoradas, valem a pena.<sup>153,157,158</sup> As perguntas que devemos fazer em relação à qualidade de vida felina, em última análise, dependem de saber o que é importante para cada

## Cinco pilares de um ambiente felino saudável

- Um lugar seguro
- Recursos múltiplos e separados para alimentação, água, bandeja sanitária, arranhadura, repouso/sono
- Oportunidade para brincadeiras e comportamento predatório
- Interações sociais positivas e previsíveis
- Respeito pela importância do olfato de um gato

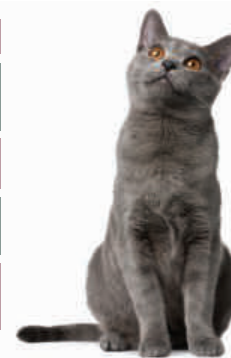

Figura 9 Os cinco pilares de um ambiente adequado

gato. Informações detalhadas sobre os instrumentos para avaliar a qualidade de vida e a qualidade de vida relacionada com a saúde são fornecidas no material complementar (ver página 631).

## Modificações do ambiente

A manutenção dos cinco pilares de um ambiente adequado requer modificações na casa ou no estilo de vida do gato diante do envelhecimento ou de doença. Os cinco pilares são descritos em detalhes nas '2013 AAFP and ISFM Feline Environmental Needs Guidelines'<sup>18</sup> (Diretrizes sobre as Necessidades Ambientais Felinas da AAFP e ISFM de 2013) e estão resumidas na Figura 9. As mudanças no ambiente e nos cuidados que podem ser necessárias para os gatos em processo de envelhecimento estão resumidas nas Tabelas 5 e 6.

Quando a equipe veterinária compartilha seu entendimento sobre o que significa a qualidade de vida, os tutores são respaldados com uma orientação consistente para avaliar essa qualidade de vida em seus gatos.

**Tabela 5** Modificações do ambiente para tornar possíveis, ou mais fáceis, as atividades diárias de gatos em processo de envelhecimento e daqueles com desafios relacionados com a saúde

| Problemas de saúde                                      | Providência                                                                                                                  | Resultado                                                                           |
|---------------------------------------------------------|------------------------------------------------------------------------------------------------------------------------------|-------------------------------------------------------------------------------------|
| <b>Artropatia degenerativa</b><br><b>Sarcopenia</b>     | <input type="checkbox"/> Degraus ou rampas para acessar locais suspensos ou elevados                                         | ✓ Mantém o acesso a um local seguro                                                 |
|                                                         | <input type="checkbox"/> Bandeja sanitária de entrada rebaixada/fácil acesso                                                 | ✓ Mantém os hábitos de toalete                                                      |
|                                                         | <input type="checkbox"/> Higienização assistida                                                                              | ✓ Mantém a higiene da pelagem                                                       |
|                                                         | <input type="checkbox"/> Vasilhas de água/comida suspensas                                                                   | ✓ Facilita o acesso a recursos essenciais e mantém a ingestão calórica e hidratação |
|                                                         | <input type="checkbox"/> Áreas de repouso aquecidas                                                                          | ✓ Mantém a temperatura corporal                                                     |
| <b>Diabetes mellitus</b><br><b>Doença renal crônica</b> | <input type="checkbox"/> Vasilhas de água de diversas configurações e em vários locais espalhados pela casa                  | ✓ Proporciona acesso fácil à água o tempo todo                                      |
| <b>Síndrome de disfunção cognitiva</b>                  | <input type="checkbox"/> Ambiente estável: não reorganize os principais recursos do gato (comida, água, bandejas sanitárias) | ✓ Ajuda o gato a localizar os recursos essenciais                                   |

**Tabela 6** Sugestão de melhorias nos cuidados de gatos em processo de envelhecimento

| Melhorias nos cuidados                                                  | Razão                                                                                                                 |
|-------------------------------------------------------------------------|-----------------------------------------------------------------------------------------------------------------------|
| <b>Palatabilizantes</b><br><b>Intensificação do aroma dos alimentos</b> | Com a idade, ocorre um declínio da função sensorial, inclusive do olfato                                              |
| <b>Corte habitual das unhas</b>                                         | As unhas ficam mais quebradiças e os comportamentos de arranhadura podem diminuir em casos de artropatia degenerativa |
| <b>Higienização assistida</b>                                           | A presença de artropatia degenerativa pode inibir a auto-higienização (lambedura)                                     |

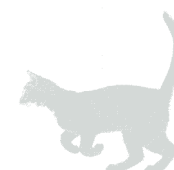

## Final da vida

### Cuidados paliativos e cuidados intensivos para pacientes com doenças avançadas

Na medicina humana, quando é feito um diagnóstico de fim de vida, o padrão convencional vem sendo tratar e prolongar a vida; no entanto, com o crescimento de especialistas em cuidados paliativos e cuidados intensivos para pacientes com doenças avançadas, agora existem opções sobre como “será o fim”. Os cuidados paliativos e os cuidados intensivos para pacientes com doenças avançadas ainda são especialidades relativamente novas na medicina humana e ainda mais recentes na medicina veterinária.<sup>159</sup> O público em geral geralmente acredita que os cuidados intensivos para pacientes com doenças avançadas (hospice em inglês) sejam um “lugar” e signifiquem “desistir”. Existe uma clara necessidade de orientar as pessoas sobre do que realmente se trata essa questão – para os tutores de gatos, isso significa a possibilidade de seu pet viver bem até o final da vida.

❖ **Os cuidados paliativos** envolvem o tratamento de dor, déficit de mobilidade, deficiências nutricionais, ansiedade e outros sinais clínicos, como náuseas e vômitos, para alcançar a melhor qualidade de vida, independentemente do desfecho da doença (p. ex., “cuidados de conforto”, com ou sem intenção curativa). Isso se aplica a condições curáveis ou crônicas, bem como a cuidados no final da vida, e pode ser prestado a pacientes de qualquer idade e a qualquer momento durante o curso de uma doença. Os cuidados paliativos incluem apoiar os tutores no cuidado de seus(s) pet(s) e ajudá-los a tomar decisões.

❖ **Os cuidados intensivos** para pacientes com doenças avançadas são uma forma especializada de cuidados paliativos que se concentram em cuidar dos pacientes durante os estágios finais de uma doença. Na medicina veterinária, isso pode incluir cuidados de conforto sem intenção curativa, seja por não haver opções ou pelo fato de os tutores optarem por não prosseguir com o tratamento, porque a probabilidade de sucesso é pequena, os efeitos colaterais superam os benefícios ou está além de seu orçamento financeiro. Os cuidados intensivos para pacientes felinos com doenças avançadas não excluem a eutanásia e podem ser considerados como uma ponte entre uma doença terminal e a eutanásia; isso pode constituir um período de tempo curto (dias) ou mais longo (de semanas a meses). Os cuidados intensivos para pacientes com doenças avançadas também incluem o apoio à família do pet.

### Orçamentos com os cuidados de saúde

Alguns questionários sobre a qualidade de vida para doenças específicas consideraram o gato em si, bem como seus tutores.<sup>159</sup> Uma ferramenta desenvolvida para avaliar o impacto das doenças de pele mostrou que a qualidade de vida era diferente entre gatos saudáveis e aqueles com dermatite alérgica e que, neste último grupo, a qualidade de vida melhorou com o tratamento.<sup>160</sup> Distúrbios do sono, aversão aos tratamentos, alterações no apetite e mudanças nas rotinas diárias contribuíram para uma baixa qualidade de vida. Para os tutores, as consequências psicológicas do cuidado de gatos com doenças de

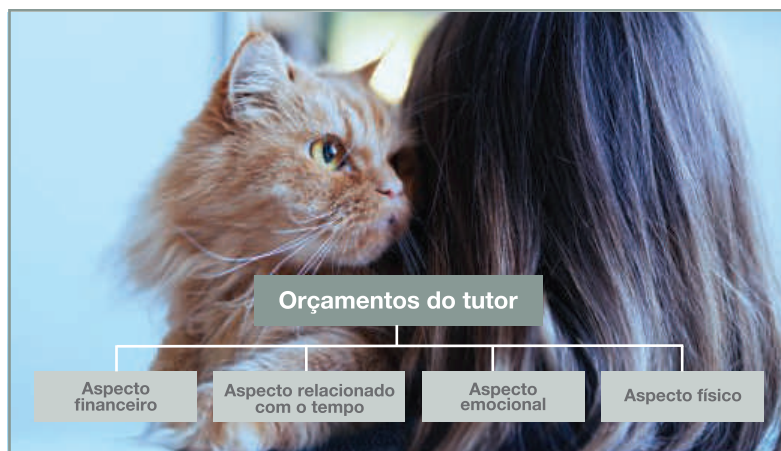

Figura 10 Os quatro orçamentos com os cuidados de saúde. Cortesia de Sheilah Robertson

## A Força-Tarefa reconhece que os tutores de gatos têm quatro orçamentos que precisam ser considerados ao se elaborar os planos terapêuticos.

pele incluíam sentimentos de tristeza, frustração, culpa e estresse relacionados com a administração de medicamentos ou tratamentos. Cuidar desses gatos leva tempo e dinheiro, podendo afetar negativamente o elo homem-animal. A gravidade da doença do gato se correlacionou significativamente com a qualidade de vida do tutor.<sup>159</sup>

É importante considerar o impacto da doença de um gato sobre o tutor. A Força-Tarefa reconhece que os tutores de gatos têm quatro orçamentos que precisam ser considerados ao se elaborar os planos terapêuticos, incluindo a eutanásia: aspecto financeiro, aspecto relacionado com o tempo, aspecto emocional e aspecto físico (Figura 10). O “peso” que cada um desses aspectos carrega varia entre os diferentes tutores, e esses orçamentos, aliados à qualidade de vida do pet, orientam as decisões clínicas.

### Tomada de decisões éticas e conversas difíceis

Quando se diagnostica uma doença grave, nosso dever é ser honesto com o cliente; no entanto, muitos acham difícil dar esse tipo de notícia. Os tutores podem solicitar tratamentos para prolongar a vida do pet, os quais consideramos inúteis e nocivos, resultando em um significativo estresse ético.<sup>150,161</sup> Se a abordagem para a tomada de decisões éticas fosse menos subjetiva e pessoal, talvez seria possível diminuir um pouco o estresse em nossa profissão. Um grupo de trabalho veterinário formado pelo European College of Veterinary Anaesthesia & Analgesia (Colégio Europeu de Anestesia e Analgesia Veterinária) criou a VET (do inglês Veterinary Ethics Tool, Ferramenta de Ética Veterinária) para auxiliar na tomada de decisões éticas. Essa ferramenta emprega uma série de checklists e tabelas, além de usar um sistema semelhante a um semáforo, com verde (razões válidas para o procedimento clínico), laranja (reconsidere o procedimento e suas responsabilidades) e vermelho (considere opções terapêuticas alternativas) para orientar o médico-veterinário.<sup>162</sup>

O ‘Serious Veterinary Illness Conversation Guide’ (Guia de Conversas sobre Doenças Veterinárias

Graves) é outro recurso baseado em recomendações semelhantes desenvolvidas para médicos humanos que lidam com pacientes no final da vida.<sup>160</sup> As diretrizes e os checklists para conversas sobre doenças graves podem ajudar a nos manter nos trilhos (i. e., no caminho certo), a navegar por questões complexas e a desenvolver um plano para avançar. Um dos principais componentes dessas conversas é perguntar ao tutor o que seu gato gostaria, dada a situação em que este se encontra; isso ajuda a reformular o processo de pensamento do tutor sobre o que o gato deseja. É importante usar o sexo e o nome corretos do gato durante essas conversas.

### Luto antecipatório

O luto antecipatório é um processo normal pelo qual aqueles que serão deixados para trás (no caso, os tutores) podem começar a experimentar mudanças emocionais associadas à morte. Esse luto antecipatório tem muitas das características do luto experimentado após uma perda e pode diminuir a intensidade das reações de luto após a morte de fato.<sup>163</sup> Não se deve subestimar o impacto da perda de um pet em indivíduos ou famílias. O apoio proativo às famílias durante esse período é uma medida importante e pode incluir a provisão de recursos ou o encaminhamento a terapeutas do luto. A equipe veterinária pode fornecer informações, a fim de que os tutores possam se preparar para o que está por vir; por exemplo, explicar o processo de eutanásia remove elementos do desconhecido.

### Eutanásia

A eutanásia é um ponto final humano; trata-se de uma opção de tratamento para um gato doente, não um fracasso. As decisões sobre o fim da vida estão entre as decisões mais difíceis tomadas pelos tutores. O quão bem os médicos-veterinários conduzem a 'última consulta' e dão suporte aos tutores influencia a decisão desses tutores de adquirir outro pet e retornar como clientes. AAFP criou um 'End of Life Educational Toolkit'<sup>164</sup> (Material Informativo sobre Final da Vida) que contém informações práticas sobre a tomada de decisões, a qualidade de vida, o processo de eutanásia, a experiência com a eutanásia, os preparativos finais, as perguntas frequentes e os recursos do cliente.

## Material complementar

Os arquivos a seguir estão disponíveis online em [jfms.com](http://jfms.com) e podem ser acessados em [catvets.com/senior-care](http://catvets.com/senior-care):

- ✦ Vídeo demonstrando a técnica de exame miofascial.
- ✦ Vídeo mostrando dicas amigáveis aos gatos (cat-friendly) para exames odontológicos felinos completos e minuciosos.
- ✦ Informações sobre instrumentos para avaliar a qualidade de vida e a qualidade de vida relacionada com a saúde.
- ✦ Folheto para o cliente.
- ✦ Recursos recomendados.

Os materiais complementares que podem ser encontrados em [catvets.com/senior-care](http://catvets.com/senior-care), além dos recursos listados anteriormente, incluem 'Why are comorbidities the "new" norm for cats?' (Por que as comorbidades são a "nova" norma para os gatos?)<sup>123</sup> e um vídeo que demonstra a presença de dor ao saltar.

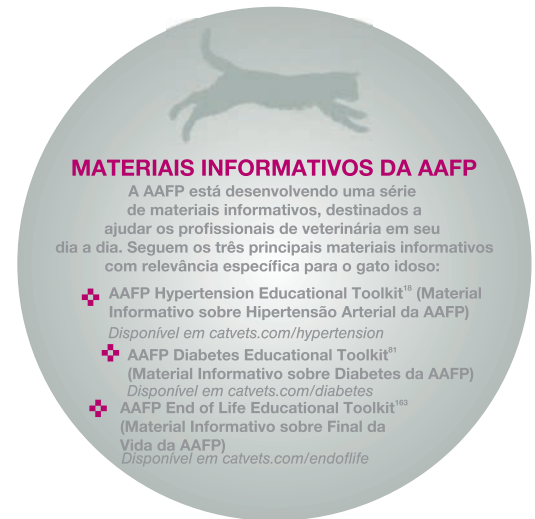

## RESUMO DOS PONTOS

- ✦ Os gatos estão vivendo mais e podem refletir o processo de envelhecimento na vida de seus tutores; portanto, esses pets geralmente fazem parte da vida de seus cuidadores, proporcionando a esperança e o apoio emocional que esses tutores desejam preservar.
- ✦ Os gatos idosos merecem o melhor atendimento veterinário possível. Este documento de Diretrizes reflete um conhecimento sobre os cuidados de gatos idosos, permitindo ao médico-veterinário incorporar a compaixão e a dignidade às recomendações comportamentais, psicológicas e médicas excepcionais. Esse cuidado utiliza as opções diagnósticas e terapêuticas de maior relevância, mais amplamente disponíveis hoje em dia.
- ✦ As conversas com os tutores ao longo da fase idosa de um gato permitem que os médicos-veterinários preparem o terreno para um envelhecimento felino ideal, ajudem o tutor a compreender o que o gato pode sofrer e sugiram modificações no ambiente doméstico que facilitem a transição (passagem) do gato para o final da vida.
- ✦ Os tutores cientes das atividades e dos comportamentos a serem observados, bem como da importância de várias mudanças nesses comportamentos, podem escolher os testes diagnósticos e tratamentos que sejam mais benéficos para o gato e, ao mesmo tempo, gerem menos encargos sobre eles.
- ✦ Ao formar um elo de confiança, o médico-veterinário e o tutor podem garantir que as principais decisões realmente representem uma compreensão do que é melhor para cada gato em particular.

## Agradecimentos

A Força-Tarefa agradece a contribuição da Dra. Kathleen Neumann na preparação do manuscrito das Diretrizes.

Estas Diretrizes foram traduzidas pela Royal Canin do Brasil.

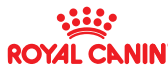

## Conflito de interesse

Hazel Carney é palestrante da Royal Canin. Jessica Quimby é uma importante formadora de opinião da Boehringer Ingelheim Animal Health USA, Inc., Dechra, Elanco, Gallant Health Care, Heska, Hill's Pet Nutrition, Inc., IDEXX Laboratories, Inc., Kindred Biosciences, Inc., Purina ProPlan Veterinary Diets, Royal Canin e Zoetis Petcare. Sheilah Robertson atua de diversas maneiras como uma importante formadora de opinião, palestrante e consultora da Elanco, Zoetis Petcare e Jurox. Os outros membros da Força-Tarefa não têm conflito de interesse a declarar.

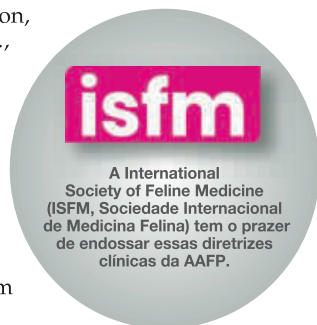

## Referências

- Pittari J, Rodan I, Beekman G, et al. **American Association of Feline Practitioners: senior care guidelines.** *J Feline Med Surg* 2009; 11: 763–778.
- Quimby J, Gowland S, Carney HC, et al. **2021 AAHA/AAFP feline life stage guidelines.** *J Feline Med Surg* 2021; 23: 211–233.
- O'Neill DG, Church DB, McGreevy PD, et al. **Longevity and mortality of cats attending primary care veterinary practices in England.** *J Feline Med Surg* 2015; 17: 125–133.
- Egenvall A, Nødtvedt A, Häggström J, et al. **Mortality of life-insured Swedish cats during 1999–2006: age, breed, sex, and diagnosis.** *J Vet Intern Med* 2009; 23: 1175–1183.
- Ali S and Garcia JM. **Sarcopenia, cachexia and aging: diagnosis, mechanisms and therapeutic options – a mini-review.** *Gerontology* 2014; 60: 294–305.
- Freeman LM. **Cachexia and sarcopenia: emerging syndromes of importance in dogs and cats.** *J Vet Intern Med* 2012; 26: 3–17.
- Laflamme DP. **Understanding the nutritional needs of healthy cats and those with diet-sensitive conditions.** *Vet Clin North Am Small Anim Pract* 2020; 50: 905–924.
- Ellis SLH, Rodan I, Carney HC, et al. **AAFP and ISFM feline environmental needs guidelines.** *J Feline Med Surg* 2013; 15: 219–230.
- Miele A, Sordo L and Gunn-Moore DA. **Feline aging: promoting physiologic and emotional well-being.** *Vet Clin North Am Small Anim Pract* 2020; 50: 719–748.
- Scherk M (ed). **Feline practice: integrating medicine and well-being (part 1).** *Vet Clin North Am Small Anim Pract* 2020; 50: 653–904.
- Rodan I, Sundahl E, Carney H, et al. **AAFP and ISFM feline-friendly handling guidelines.** *J Feline Med Surg* 2011; 13: 364–375.
- Epstein ME, Rodan I, Griffenhagen J, et al. **AAHA/AAFP pain management guidelines for dogs and cats.** *J Feline Med Surg* 2015; 17: 251–272.
- Bijsmans ES, Jepson RE, Chang YM, et al. **Changes in systolic blood pressure over time in healthy cats and cats with chronic kidney disease.** *J Vet Intern Med* 2015; 29: 855–861.
- Jepson RE. **Feline systemic hypertension. Classification and pathogenesis.** *J Feline Med Surg* 2011; 13: 35–43.
- Maggio F, DeFrancesco TC, Atkins CE, et al. **Ocular lesions associated with systemic hypertension in cats: 69 cases (1985–1998).** *J Am Vet Med Assoc* 2000; 217: 695–702.
- Brown S, Atkins C, Bagley R, et al. **Guidelines for the identification, evaluation, and management of systemic hypertension in dogs and cats.** *J Vet Intern Med* 2007; 21: 542–558.
- Taylor SS, Sparkes AH, Briscoe K, et al. **ISFM consensus guidelines on the diagnosis and management of hypertension in cats.** *J Feline Med Surg* 2017; 19: 288–303.
- AAFP. **2021 Hypertension educational toolkit.** Available at: [catvets.com/hypertension](http://catvets.com/hypertension).
- Williams DL and Heath MF. **Prevalence of feline cataract: results of a cross-sectional study of 2000 normal animals, 50 cats with diabetes and one hundred cats following dehydration crises.** *Vet Ophthalmol* 2006; 9: 341–349.
- Guyonnet A, Donzel E, Bourguet A, et al. **Epidemiology and clinical presentation of feline cataracts in france: a retrospective study of 268 cases.** *Vet Ophthalmol* 2019; 22: 116–124.
- Sebbag L, Kass PH and Maggs DJ. **Reference values, intertest correlations, and test-retest repeatability of selected tear film tests in healthy cats.** *J Am Vet Med Assoc* 2015; 246: 426–435.
- Sandhas E, Merle R and Eule JC. **Consider the eye in preventive healthcare – ocular findings, intraocular pressure and Schirmer tear test in ageing cats.** *J Feline Med Surg* 2018; 20: 1063–1071.
- Stiles J and Kimmitt B. **Eye examination in the cat: step-by-step approach and common findings.** *J Feline Med Surg* 2016; 18: 702–711.
- Carter J. **Hypertensive ocular disease in cats: a guide to fundic lesions to facilitate early diagnosis.** *J Feline Med Surg* 2019; 21: 35–45.

## Financiamento

Essas Diretrizes foram apoiadas por uma bolsa de estudo para a AAFF pelas empresas Boehringer Ingelheim Animal Health USA Inc., IDEXX Laboratories, Inc., Merck Animal Health, Purina Pro Plan Veterinary Diets, Royal Canin e Zoetis Petcare. Os autores não receberam nenhum apoio financeiro para a pesquisa, autoria e/ou publicação deste artigo.

## Aprovação ética

Este trabalho não envolveu o uso de animais e, portanto, a aprovação ética não foi especificamente exigida para a publicação no JFMS.

## Consentimento informado

Este trabalho não envolveu o uso de animais (inclusive cadáveres) e, portanto, não foi necessária a obtenção de consentimento informado. Para quaisquer animais ou pessoas identificados individualmente nesta publicação, obteve-se das pessoas envolvidas o consentimento informado (seja verbal ou escrito) para seu uso na publicação.

## Aviso legal

Esta publicação pretende ser uma tradução completa e fiel da versão original em inglês. Os autores, editores, Sociedades e Editora não aceitarão qualquer responsabilidade legal por quaisquer erros ou omissões que possam ser feitos nesta tradução. As sociedades (AAFP e ISFM) e o editor (SAGE Publishing) não oferecem nenhuma garantia, expressa ou implícita, com relação ao material aqui contido e não se responsabilizam por quaisquer erros cometidos durante a tradução do artigo.

- 25 Norsworthy GD, Adams VJ, Mcelhaney MR, et al. **Relationship between semi-quantitative thyroid palpation and total thyroxine concentration in cats with and without hyperthyroidism.** *J Feline Med Surg* 2002; 4: 139–143.
- 26 Paepe D, Smets P, van Hoek I, et al. **Within- and between-examiner agreement for two thyroid palpation techniques in healthy and hyperthyroid cats.** *J Feline Med Surg* 2008; 10: 558–565.
- 27 Boretti FS, Sieber-Ruckstuhl NS, Gerber B, et al. **Thyroid enlargement and its relationship to clinicopathological parameters and T4 status in suspected hyperthyroid cats.** *J Feline Med Surg* 2009; 11: 286–292.
- 28 Little S, Levy J, Hartmann K, et al. **2020 AAHP feline retrovirus testing and management guidelines.** *J Feline Med Surg* 2020; 22: 5–30.
- 29 Bennett D, Zainal Ariffin SM bt and Johnston P. **Osteoarthritis in the cat: 1. How common is it and how easy to recognise?** *J Feline Med Surg* 2012; 14: 65–75.
- 30 Kranenburg HC, Meij BP, van Hofwegen EML, et al. **Prevalence of spondylosis deformans in the feline spine and correlation with owner-perceived behavioural changes.** *Vet Comp Orthop Traumatol* 2012; 25: 217–223.
- 31 Slingerland LI, Hazewinkel HAW, Meij BP, et al. **Cross-sectional study of the prevalence and clinical features of osteoarthritis in 100 cats.** *Vet J* 2011; 187: 304–309.
- 32 Little S (ed). *The cat: clinical medicine and management.* St Louis, MO: Elsevier Saunders, 2012.
- 33 Whitlock EL and Whittington RA. **The frailty syndrome: anesthesiologists must understand more and fear less.** *Anesth Analg* 2020; 130: 1445–1448.
- 34 Fried LP, Tangen CM, Walston J, et al. **Frailty in older adults: evidence for a phenotype.** *J Gerontol A Biol Sci Med Sci* 2001; 56: M146–156.
- 35 Mitnitski AB, Mogilner AJ and Rockwood K. **Accumulation of deficits as a proxy measure of aging.** *Sci World J* 2001; 1: 323–336.
- 36 Scarlett JM, Donoghue S, Saidla J, et al. **Overweight cats: prevalence and risk factors.** *Int J Obes Relat Metab Disord* 1994; 18 Suppl 1: S22–28.
- 37 Harper EJ. **Changing perspectives on aging and energy requirements: aging, body weight and body composition in humans, dogs and cats.** *J Nutr* 1998; 128 Suppl 12: 27S–31S.
- 38 Teng KT, McGreevy PD, Toribio JL, et al. **Strong associations of nine-point body condition scoring with survival and lifespan in cats.** *J Feline Med Surg* 2018; 20: 1110–1118.
- 39 Laflamme DP and Ballam JM. **Effect of age on maintenance energy requirements of adult cats.** *Compend Contin Educ Pract Vet* 2002; 24: 82.
- 40 Cupp C, Perez-Camargo G, Patil A, et al. **Long-term food consumption and body weight changes in a controlled population of geriatric cats.** *Compend Contin Educ Small Anim Pract* 2004; 26: 60.
- 41 Bellows J, Center S, Daristotle L, et al. **Evaluating aging in cats: how to determine what is healthy and what is disease.** *J Feline Med Surg* 2016; 18: 551–570.
- 42 Rollins AW and Murphy M. **Nutritional assessment in the cat: practical recommendations for better medical care.** *J Feline Med Surg* 2019; 21: 442–448.
- 43 Taylor EJ, Adams C and Neville R. **Some nutritional aspects of ageing in dogs and cats.** *Proc Nutr Soc* 1995; 54: 645–656.
- 44 Freiche V, Deswarte G, Soulard Y, et al. **A psyllium-enriched dry extruded diet improves recurrent feline constipation [abstract].** *J Vet Intern Med* 2010; 24: 1547.
- 45 Tam FM, Carr AP and Myers SL. **Safety and palatability of polyethylene glycol 3350 as an oral laxative in cats.** *J Feline Med Surg* 2011; 13: 694–697.
- 46 Stone AES, Brummett GO, Carozza EM, et al. **2020 AAHA/AAHP feline vaccination guidelines.** *J Feline Med Surg* 2020; 22: 813–830.
- 47 Clarke DE and Caiafa A. **Oral examination in the cat: a systematic approach.** *J Feline Med Surg* 2014; 16: 873–886.
- 48 Whyte A, Gracia A, Bonastre C, et al. **Oral disease and microbiota in free-roaming cats.** *Top Companion Anim Med* 2017; 32: 91–95.
- 49 Ingham KE, Gorrel C, Blackburn J, et al. **Prevalence of odontoclastic resorptive lesions in a population of clinically healthy cats.** *J Small Anim Pract* 2001; 42: 439–443.
- 50 Whyte A, Lacasta S, Whyte J, et al. **Tooth resorption in Spanish domestic cats: preliminary data.** *Top Companion Anim Med* 2020; 38. DOI: 10.1016/j.tcam.2019.100369.
- 51 Niemiec B, Gawor J, Nemec A, et al. **World Small Animal Veterinary Association global dental guidelines.** *J Small Anim Pract* 2020; 61: 395–403.
- 52 Brodbelt DC, Pfeiffer DU, Young LE, et al. **Risk factors for anaesthetic-related death in cats: results from the confidential enquiry into perioperative small animal fatalities (CEP-SAF).** *Br J Anaesth* 2007; 99: 617–623.
- 53 Robertson SA, Gogolski SM, Pascoe P, et al. **AAHP feline anesthesia guidelines.** *J Feline Med Surg* 2018; 20: 602–634.
- 54 Carney HC, Little S, Brownlee-Tomasso D, et al. **AAHP and ISFM feline-friendly nursing care guidelines.** *J Feline Med Surg* 2012; 14: 337–349.
- 55 Davis H, Jensen T, Johnson A, et al. **2013 AAHA/AAHP fluid therapy guidelines for dogs and cats.** *J Am Anim Hosp Assoc* 2013; 49: 149–159.
- 56 Alvis BD and Hughes CG. **Physiology considerations in geriatric patients.** *Anesthesiol Clin* 2015; 33: 447–456.
- 57 Blatteis CM. **Age-dependent changes in temperature regulation – a mini review.** *Gerontology* 2012; 58: 289–295.
- 58 Sparkes AH, Caney S, Chalhoub S, et al. **ISFM consensus guidelines on the diagnosis and management of feline chronic kidney disease.** *J Feline Med Surg* 2016; 18: 219–239.
- 59 International Renal Interest Society. **IRIS staging of CKD.** [http://www.iris-kidney.com/pdf/IRIS\\_Staging\\_of\\_CKD\\_modified\\_2019.pdf](http://www.iris-kidney.com/pdf/IRIS_Staging_of_CKD_modified_2019.pdf) (2019, accessed February 6, 2020).
- 60 Quimby JM and Lunn KF. **Mirtazapine as an appetite stimulant and anti-emetic in cats with chronic kidney disease: a masked placebo-controlled crossover clinical trial.** *Vet J* 2013; 197: 651–655.
- 61 Ross SJ, Osborne CA, Kirk CA, et al. **Clinical evaluation of dietary modification for treatment of spontaneous chronic kidney disease in cats.** *J Am Vet Med Assoc* 2006; 229: 949–957.
- 62 King JN, Tasker S, Gunn-Moore DA, et al. **Prognostic factors in cats with chronic kidney disease.** *J Vet Intern Med* 2007; 21: 906–916.
- 63 Chakrabarti S, Syme HM and Elliott J. **Clinicopathological variables predicting progression of azotemia in cats with chronic kidney disease.** *J Vet Intern Med* 2012; 26: 275–281.
- 64 Syme HM, Markwell PJ, Pfeiffer D, et al. **Survival of cats with naturally occurring chronic renal failure is related to severity of proteinuria.** *J Vet Intern Med* 2006; 20: 528–535.
- 65 Mayer-Roenne B, Goldstein RE and Erb HN. **Urinary tract infections in cats with hyperthyroidism, diabetes mellitus and chronic kidney disease.** *J Feline Med Surg* 2007; 9: 124–132.

- 66 Dorsch R, Teichmann-Knorrn S and Sjetne Lund H. **Urinary tract infection and subclinical bacteriuria in cats: a clinical update.** *J Feline Med Surg* 2019; 21: 1023–1038.
- 67 Quimby JM, Gustafson DL and Lunn KF. **The pharmacokinetics of mirtazapine in cats with chronic kidney disease and in age-matched control cats.** *J Vet Intern Med* 2011; 25: 985–989.
- 68 Quimby JM, Lorbach S, Saffire A, et al. **Pharmacokinetics of gabapentin in cats with chronic kidney disease [abstract].** *J Vet Intern Med* 2020; 34: 2825–2826.
- 69 Peterson ME. **Hyperthyroidism in cats: what's causing this epidemic of thyroid disease and can we prevent it?** *J Feline Med Surg* 2012; 14: 804–818.
- 70 Carney HC, Ward CR, Bailey SJ, et al. **2016 AAFP guidelines for the management of feline hyperthyroidism.** *J Feline Med Surg* 2016; 18: 400–416.
- 71 Samaha G, Beatty J, Wade CM, et al. **The Burmese cat as a genetic model of type 2 diabetes in humans.** *Anim Genet* 2019; 50: 319–325.
- 72 Rand J. **Feline diabetes mellitus.** In: Mooney CT and Peterson ME (eds). *BSAVA manual of canine and feline endocrinology*. Gloucester: British Small Animal Veterinary Association, 2012, pp 133–147.
- 73 Gostelow R, Forcada Y, Graves T, et al. **Systematic review of feline diabetic remission: separating fact from opinion.** *Vet J* 2014; 202: 208–221.
- 74 Roomp K and Rand J. **Intensive blood glucose control is safe and effective in diabetic cats using home monitoring and treatment with glargine.** *J Feline Med Surg* 2009; 11: 668–682.
- 75 Cook A. **Diabetes mellitus: why cats are different.** <https://www.youtube.com/watch?v=-qSfYCKdaeY?> (2020, accessed month day, year).
- 76 Forcada Y, German AJ, Noble PJM, et al. **Determination of serum fPLI concentrations in cats with diabetes mellitus.** *J Feline Med Surg* 2008; 10: 480–487.
- 77 Reusch CE, Kley S and Casella M. **Home monitoring of the diabetic cat.** *J Feline Med Surg* 2006; 8: 119–127.
- 78 Casella M, Hässig M and Reusch CE. **Home-monitoring of blood glucose in cats with diabetes mellitus: evaluation over a 4-month period.** *J Feline Med Surg* 2005; 7: 163–171.
- 79 Alt N, Kley S, Haessig M, et al. **Day-to-day variability of blood glucose concentration curves at home in cats with diabetes mellitus.** *J Am Vet Med Assoc* 2007; 230: 1011–1017.
- 80 Sparkes AH, Cannon M, Church D, et al. **ISFM consensus guidelines on the practical management of diabetes mellitus in cats.** *J Feline Med Surg* 2015; 17: 235–250.
- 81 AAFF. **2019 Diabetes educational toolkit.** Available at: [catvets.com/diabetes](http://catvets.com/diabetes).
- 82 Perry R and Tutt C. **Periodontal disease in cats: back to basics – with an eye on the future.** *J Feline Med Surg* 2015; 17: 45–65.
- 83 Watanabe R, Doodnaught GM, Evangelista MC, et al. **Inter-rater reliability of the Feline Grimace Scale in cats undergoing dental extractions.** *Front Vet Sci* 2020; 7: 302. DOI: 10.3389/fvets.2020.00302.
- 84 Bellows J, Center S, Daristotle L, et al. **Aging in cats: common physical and functional changes.** *J Feline Med Surg* 2016; 18: 533–550.
- 85 Benjamin SE and Drobatz KJ. **Retrospective evaluation of risk factors and treatment outcome predictors in cats presenting to the emergency room for constipation.** *J Feline Med Surg* 2020; 22: 153–160.
- 86 de Brito Galvão JF, Parker V, Schenck PA, et al. **Update on feline ionized hypercalcemia.** *Vet Clin North Am Small Anim Pract* 2017; 47: 273–292.
- 87 Williams JM, Panciera DL, Larson MM, et al. **Ultrasonographic findings of the pancreas in cats with elevated serum pancreatic lipase immunoreactivity.** *J Vet Intern Med* 2013; 27: 913–918.
- 88 Graf R, Grüntzig K, Boo G, et al. **Swiss Feline Cancer Registry 1965–2008: the influence of sex, breed and age on tumour types and tumour locations.** *J Comp Pathol* 2016; 154: 195–210.
- 89 Ho NT, Smith KC and Dobromylskyj MJ. **Retrospective study of more than 9000 feline cutaneous tumours in the UK: 2006–2013.** *J Feline Med Surg* 2018; 20: 128–134.
- 90 Monteiro BP and Steagall PV. **Chronic pain in cats: recent advances in clinical assessment.** *J Feline Med Surg* 2019; 21: 601–614.
- 91 Lascelles BDX, Henry JB, Brown J, et al. **Cross-sectional study of the prevalence of radiographic degenerative joint disease in domesticated cats.** *Vet Surg* 2010; 39: 535–544.
- 92 Godfrey D and Vaughan L. **Historical prevalence of radiological appendicular osteoarthritis in cats (1972–1973).** *J Am Anim Hosp Assoc* 2018; 54: 209–212.
- 93 Adrian D, Papich M, Baynes R, et al. **Chronic maladaptive pain in cats: a review of current and future drug treatment options.** *Vet J* 2017; 230: 52–61.
- 94 Benito J, DePuy V, Hardie E, et al. **Reliability and discriminatory testing of a client-based metrology instrument, feline musculoskeletal pain index (FMPI) for the evaluation of degenerative joint disease-associated pain in cats.** *Vet J* 2013; 196: 368–373.
- 95 Benito J, Hansen B, Depuy V, et al. **Feline musculoskeletal pain index: responsiveness and testing of criterion validity.** *J Vet Intern Med* 2013; 27: 474–482.
- 96 Gruen ME, Griffith EH, Thomson AE, et al. **Criterion validation testing of clinical metrology instruments for measuring degenerative joint disease associated mobility impairment in cats.** *PLoS One* 2015; 10. DOI: 10.1371/journal.pone.0131839.
- 97 Enomoto M, Lascelles BDX and Gruen ME. **Development of a checklist for the detection of degenerative joint disease-associated pain in cats.** *J Feline Med Surg* 2020; 22: 1137–1147.
- 98 Gruen ME, Griffith E, Thomson A, et al. **Detection of clinically relevant pain relief in cats with degenerative joint disease associated pain.** *J Vet Intern Med* 2014; 28: 346–350.
- 99 Guedes AGP, Meadows JM, Pypendop BH, et al. **Assessment of the effects of gabapentin on activity levels and owner-perceived mobility impairment and quality of life in osteoarthritic geriatric cats.** *J Am Vet Med Assoc* 2018; 253: 579–585.
- 100 Monteiro BP, Klinck MP, Moreau M, et al. **Analgesic efficacy of tramadol in cats with naturally occurring osteoarthritis.** *PLoS One* 2017; 12. DOI: 10.1371/journal.pone.0175565.
- 101 Guedes AGP, Meadows JM, Pypendop BH, et al. **Evaluation of tramadol for treatment of osteoarthritis in geriatric cats.** *J Am Vet Med Assoc* 2018; 252: 565–571.
- 102 Marino CL, Lascelles BDX, Vaden SL, et al. **Prevalence and classification of chronic kidney disease in cats randomly selected from four age groups and in cats recruited for degenerative joint disease studies.** *J Feline Med Surg* 2014; 16: 465–472.
- 103 Gowan RA, Lingard AE, Johnston L, et al. **Retrospective case-**

- control study of the effects of long-term dosing with meloxicam on renal function in aged cats with degenerative joint disease. *J Feline Med Surg* 2011; 13: 752–761.
- 104 Gowan RA, Baral RM, Lingard AE, et al. **A retrospective analysis of the effects of meloxicam on the longevity of aged cats with and without overt chronic kidney disease.** *J Feline Med Surg* 2012; 14: 876–881.
  - 105 King JN, King S, Budsberg SC, et al. **Clinical safety of robenacoxib in feline osteoarthritis: results of a randomized, blinded, placebo-controlled clinical trial.** *J Feline Med Surg* 2016; 18: 632–642.
  - 106 KuKanich K, George C, Roush JK, et al. **Effects of low-dose meloxicam in cats with chronic kidney disease.** *J Feline Med Surg* 2021; 23: 138–148.
  - 107 Gruen ME, Thomson AE, Griffith EH, et al. **A feline-specific anti-nerve growth factor antibody improves mobility in cats with degenerative joint disease-associated pain: a pilot proof of concept study.** *J Vet Intern Med* 2016; 30: 1138–1148.
  - 108 Lanz OI. **Lumbosacral and pelvic injuries.** *Vet Clin North Am Small Anim Pract* 2002; 32: 949–962.
  - 109 Might KR and Gregory CR. **Tenesmus and obstipation in a cat.** *Compend Contin Educ Vet* 2010; 32: E1–3.
  - 110 Sordo L, Breheny C, Halls V, et al. **Prevalence of disease and age-related behavioural changes in cats: past and present.** *Vet Sci* 2020; 7: 85. DOI: 10.3390/vetsci7030085.
  - 111 Landsberg G. **Behavior problems of older cats.** In: Schaumburg I (ed). *Proceedings of the 135th Annual Meeting of the American Veterinary Medical Association*. San Diego, CA, 1998, pp 317–320.
  - 112 Gunn-Moore D, Moffat K, Christie L-A, et al. **Cognitive dysfunction and the neurobiology of ageing in cats.** *J Small Anim Pract* 2007; 48: 546–553.
  - 113 Moffat K and Landsberg G. **An investigation of the prevalence of clinical signs of cognitive dysfunction syndrome (CDS) in cats [abstract].** *J Am Anim Hosp Assoc* 2003; 39: 512.
  - 114 Bennett D and Morton C. **A study of owner observed behavioural and lifestyle changes in cats with musculoskeletal disease before and after analgesic therapy.** *J Feline Med Surg* 2009; 11: 997–1004.
  - 115 Gunn-Moore D. **Cognitive dysfunction in the cat.** In: Little SE (ed). *August's consultations in feline internal medicine*. St Louis, MO: Saunders Elsevier, 2016, pp 977–985.
  - 116 Haupt K, Levine E, Landsberg G, et al. **Anti-oxidant fortified food improves owner perceived behavior in the aging cat.** *Proceedings of the ESFM Feline Conference; 2007; Prague, Czech Republic*.
  - 117 Pan Y, Araujo JA, Burrows J, et al. **Cognitive enhancement in middle-aged and old cats with dietary supplementation with a nutrient blend containing fish oil, B vitamins, antioxidants and arginine.** *Br J Nutr* 2013; 110: 40–49.
  - 118 Araujo JA, Faubert ML, Brooks ML, et al. **NOVIFIT (NoviSAmE) tablets improve executive function in aged dog and cats: implications for treatment of cognitive dysfunction syndrome.** *Intern J Appl Res Vet Med* 2012; 10: 90–98.
  - 119 Griffith CA, Steigerwald ES and Buffington CAT. **Effects of a synthetic facial pheromone on behavior of cats.** *J Am Vet Med Assoc* 2000; 217: 1154–1156.
  - 120 Landsberg G. **Therapeutic options for cognitive decline in senior pets.** *J Am Anim Hosp Assoc* 2006; 42: 407–413.
  - 121 Gunn-Moore DA. **Geriatric cats and cognitive dysfunction syndrome.** In: *Proceedings of the WSAVA Annual Congress*, Dublin, Ireland, 2008.
  - 122 Puig J, Cattin I and Seth M. **Concurrent diseases in hyperthyroid cats undergoing assessment prior to radioiodine treatment.** *J Feline Med Surg* 2015; 17: 537–542.
  - 123 Scherk M. **Why are comorbidities the 'new' norm for cats?** In: *Proceedings of the American Association of Feline Practitioners 2019 Conference*. San Francisco, CA, 2019, pp 71–76. Available at [catvets.com/senior-care](http://catvets.com/senior-care) (2019).
  - 124 López-Otín C, Blasco MA, Partridge L, et al. **The hallmarks of aging.** *Cell* 2013; 153: 1194–1217.
  - 125 Fulop T, Larbi A, Dupuis G, et al. **Immunosenescence and inflamm-aging as two sides of the same coin: friends or foes?** *Front Immunol* 2018; 8. DOI: 10.3389/fimmu.2017.01960.
  - 126 Belanger MC. **Concurrent disease management: heart failure and chronic kidney disease.** In: Little S (ed). *The cat: clinical medicine and management*. St Louis, MO: Saunders, 2012, p 1108.
  - 127 Trevejo RT, Lefebvre SL, Yang M, et al. **Survival analysis to evaluate associations between periodontal disease and the risk of development of chronic azotemic kidney disease in cats evaluated at primary care veterinary hospitals.** *J Am Vet Med Assoc* 2018; 252: 710–720.
  - 128 Finch NC, Syme HM and Elliott J. **Risk factors for development of chronic kidney disease in cats.** *J Vet Intern Med* 2016; 30: 602–610.
  - 129 Hoenig M. **Concurrent disease management: hyperthyroidism and diabetes mellitus.** In: Little S (ed). *The cat: clinical medicine and management*. St Louis, MO: Saunders, 2012, p 1101.
  - 130 Hoenig M. **Concurrent disease management: diabetes mellitus and obesity.** In: Little S (ed). *The cat: clinical medicine and management*. St Louis, MO: Saunders, 2012, p 110.
  - 131 Pérez-López L, Boronat M, Melián C, et al. **Assessment of the association between diabetes mellitus and chronic kidney disease in adult cats.** *J Vet Intern Med* 2019; 33: 1921–1925.
  - 132 Cook AK and Evans JB. **Feline comorbidities: recognition, diagnosis and management of the cushingoid diabetic.** *J Feline Med Surg* 2021; 23: 4–16.
  - 133 Greco D. **Concurrent disease management: diabetes mellitus and feline lower urinary tract disorders.** In: Little S (ed). *The cat: clinical medicine and management*. St Louis MO: Saunders, 2012, p 1106.
  - 134 Tarkosova D, Story MM, Rand JS, et al. **Feline obesity – prevalence, risk factors, pathogenesis, associated conditions and assessment: a review.** *Veterinari Medicina* 2016; 61: 295–307.
  - 135 Simpson KW. **Pancreatitis and triaditis in cats: causes and treatment.** *J Small Anim Pract* 2015; 56: 40–49.
  - 136 Cerna P, Kilpatrick S and Gunn-Moore DA. **Feline comorbidities: what do we really know about feline triaditis?** *J Feline Med Surg* 2020; 22: 1047–1067.
  - 137 Greene JP, Lefebvre SL, Wang M, et al. **Risk factors associated with the development of chronic kidney disease in cats evaluated at primary care veterinary hospitals.** *J Am Vet Med Assoc* 2014; 244: 320–327.
  - 138 Saito E and Kleinhenz S. **Comorbidities in underweight cats.** *Vet Focus* 2017; 27.
  - 139 Campigotto AJ, Poljak Z, Stone EA, et al. **Investigation of relationships between body weight and age among domestic cats stratified by breed and sex.** *J Am Vet Med Assoc* 2019; 255: 205–212.

- 140 Fotin M, Lapointe L, Hudon C, et al. **Multimorbidity and quality of life in primary care: a systematic review.** *Health Qual Life Outcomes* 2004; 2: 51. DOI: 10.1186/1477-7525-2-51.
- 141 Kukanich B. **Geriatric veterinary pharmacology.** *Vet Clin North Am Small Anim Pract* 2012; 42: 631–642.
- 142 Mansfield CS and Jones BR. **Review of feline pancreatitis part two: clinical signs, diagnosis and treatment.** *J Feline Med Surg* 2001; 3: 125–132.
- 143 Xenoulis PG, Suchodolski JS and Steiner JM. **Chronic pancreatitis in dogs and cats.** *Compend Contin Educ Vet* 2008; 30: 166–181.
- 144 Peterson ME and Gamble DA. **Effect of nonthyroidal illness on serum thyroxine concentrations in cats: 494 cases (1988).** *J Am Vet Med Assoc* 1990; 197: 1203–1208.
- 145 Wakeling J, Moore K, Elliott J, et al. **Diagnosis of hyperthyroidism in cats with mild chronic kidney disease.** *J Small Anim Pract* 2008; 49: 287–294.
- 146 Barnoski J, Lee-Fowler TM, Boothe DM, et al. **Serum theophylline after multiple dosing with transdermal gels in cats.** *J Feline Med Surg* 2019; 21: 329–334.
- 147 Eichstadt LR. **Compounding transdermal medication for feline patients.** *Int J Pharm Compd* 2016; 20: 271–274.
- 148 Naugle KM, Fillingim RB and Riley JL. **A meta-analytic review of the hypoalgesic effects of exercise.** *J Pain* 2012; 13: 1139–1150.
- 149 Whitehead K, Cortes Y and Eirmann L. **Gastrointestinal dysmotility disorders in critically ill dogs and cats.** *J Vet Emerg Crit Care* 2016; 26: 234–254.
- 150 Batchelor CEM and McKeegan DEF. **Survey of the frequency and perceived stressfulness of ethical dilemmas encountered in UK veterinary practice.** *Vet Rec* 2012; 170: 19. DOI: 10.1136/vr.100262.
- 151 Tatlock S, Gober M, Williamson N, et al. **Development and preliminary psychometric evaluation of an owner-completed measure of feline quality of life.** *Vet J* 2017; 228: 22–32.
- 152 FDA. **Patient-reported outcome measures: use in medical product development to support labeling claims: guidance for industry.** US Food & Drug Administration. <https://www.fda.gov/regulatory-information/search-fda-guidance-documents/patient-reported-outcome-measures-use-medical-product-development-support-labeling-claims> (2009, accessed September 19, 2020).
- 153 Spofford N, Lefebvre SL, McCune S, et al. **Should the veterinary profession invest in developing methods to assess quality of life in healthy dogs and cats?** *J Am Vet Med Assoc* 2013; 243: 952–956.
- 154 Noble CE, Wiseman-Orr LM, Scott ME, et al. **Development, initial validation and reliability testing of a web-based, generic feline health-related quality-of-life instrument.** *J Feline Med Surg* 2019; 21: 84–94.
- 155 Rioja-Lang F, Bacon H, Connor M, et al. **Determining priority welfare issues for cats in the United Kingdom using expert consensus.** *Vet Rec Open* 2019; 6. DOI: 10.1136/vetreco-2019-000365.
- 156 Meyer RE and Robertson SA. **Surveys and objectifying the subjective.** *Vet Anaes Analg* 2016; 43: 358–360.
- 157 Yeates J and Main D. **Assessment of companion animal quality of life in veterinary practice and research.** *J Small Anim Pract* 2009; 50: 274–281.
- 158 Scott EM, Nolan A, Reid J, et al. **Can we really measure animal quality of life? Methodologies for measuring quality of life in people and other animals.** *Anim Welf* 2007; 16: 16–24.
- 159 Bishop G, Cooney K, Cox S, et al. **2016 AAHA/IAAHPC end-of-life care guidelines.** *J Am Anim Hosp Assoc* 2016; 52: 341–356.
- 160 Noli C, Borio S, Varina A, et al. **Development and validation of a questionnaire to evaluate the Quality of Life of cats with skin disease and their owners, and its use in 185 cats with skin disease.** *Vet Dermatol* 2016; 27: 247–e58.
- 161 Goldberg KJ. **Goals of care: development and use of the serious veterinary illness conversation guide.** *Vet Clin North Am Small Anim Pract* 2019; 49: 399–415.
- 162 Grimm H, Bergadano A, Musk GC, et al. **Drawing the line in clinical treatment of companion animals: recommendations from an ethics working party.** *Vet Rec* 2018; 182: 664. DOI: 10.1136/vr.104559.
- 163 Cox S. **Anticipatory grief and preparation for pet loss.** In: Gardner M and McVety D (eds). *Treatment and care of the geriatric veterinary patient.* Wiley Blackwell, 2017, pp 311–315.
- 164 AAAP. **2021 AAAP end of life educational toolkit.** Available at: [catvets.com/endoflife](http://catvets.com/endoflife).

Disponível online em [jfms.com](http://jfms.com) and [catvets.com/senior-care](http://catvets.com/senior-care)

Article reuse guidelines: [sagepub.co.uk/journals-permissions](http://sagepub.co.uk/journals-permissions)
