# Supplementary material
Source: PubMed Central journal article supplement (PMC10812122)
Supplement: sj-pdf-7-jfm-10.1177_1098612X211021538.pdf [file sj-pdf-7-jfm-10.1177_1098612X211021538.pdf]

# Guide de recommandations 2021 de l'AAFP sur les soins pour les chats âgés

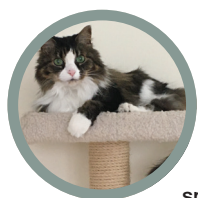

**Résumé :** Les « Recommandations 2021 de l'AAFP sur les soins pour les chats âgés » ont été rédigées par un groupe de travail composé d'experts en médecine clinique féline et constituent une mise à jour et une extension de celles publiées en 2009. Elles mettent l'accent sur l'évaluation individuelle du patient et le processus de vieillissement, avec des références à d'autres guides de recommandations de pratique féline pour une discussion plus complète sur des maladies spécifiques. Le fait de se pencher sur le cas de chaque chat encourage le propriétaire à participer à toutes les étapes de la prise en charge de son animal. Une discussion complète lors de l'examen physique et de l'anamnèse permet d'adapter l'approche à la fois pour le chat et pour la famille impliquée dans les soins. Des vidéos et l'analyse de l'ensemble des résultats antérieurs sont intégrées à l'évaluation de chaque patient. Ce guide présente le nouveau concept de fragilité, avec une description et des méthodes pour l'incorporer dans l'évaluation du chat âgé. Les diagnostics de base sont abordés, ainsi que des recommandations pour des investigations complémentaires. Par exemple, l'évaluation de la pression artérielle est incluse comme procédure diagnostique minimale à la fois chez les chats apparemment sains et chez ceux malades. Les chats vieillissent à un rythme beaucoup plus rapide que les humains, c'est la raison pour laquelle des délais pratiques pour la fréquence des tests sont inclus et suggèrent une augmentation de la fréquence des diagnostics avec le vieillissement. L'importance de la nutrition, ainsi que les besoins nutritionnels et les carences des chats âgés, sont pris en compte. La douleur est considérée comme un syndrome à part entière, et l'accent est mis sur sa prise en charge chez chaque chat âgé. Le groupe de travail aborde l'anesthésie, ainsi que les stratégies permettant aux chats âgés d'être anesthésiés en toute sécurité à un âge avancé. Le concept médical de qualité de vie est abordé avec les dernières informations disponibles en médecine vétérinaire. Cela inclut les considérations de fin de vie, comme les soins palliatifs et d'hospices, ainsi que des recommandations sur l'établissement des « budgets alloués aux soins », qui influencent grandement ce qui peut être fait pour chaque chat. Les auteurs reconnaissent que chaque propriétaire de chat aura une attitude différente à cet égard, et qu'il est important de déterminer ce qui est raisonnable et pratique pour lui. Une discussion sur l'euthanasie offre quelques recommandations pour aider le propriétaire à prendre une décision au mieux des intérêts de chaque chat.

**Mots-clés :** âgé ; fragilité ; comorbidités ; qualité de vie ; sarcopénie ; pression artérielle ; douleur ; hypertension ; maladie rénale chronique ; hyperthyroïdie ; arthrose ; maladie dégénérative articulaire ; diabète sucré ; anesthésie ; maladie gastro-intestinale ; maladie dentaire ; cancer ; syndrome de dysfonctionnement cognitif ; fin de vie ; soins palliatifs ; soins d'hospice ; budgets alloués aux soins ; euthanasie.

## Introduction

Depuis la publication du « Guide de recommandations de l'AAFP sur les soins apportés aux chats âgés » en 2009<sup>1</sup>, nos connaissances ont considérablement progressé et les propriétaires de chats d'aujourd'hui s'attendent à un niveau de soins plus élevé. En médecine humaine, la gériatrie manque de spécialistes pour de multiples raisons. En médecine féline, la plupart d'entre nous aiment s'occuper des chats âgés ; ce sont souvent nos patients préférés. Nous pourrions probablement remplir une spécialité en gériatrie féline avec des vétérinaires enthousiastes. En réponse aux progrès récents et à l'intérêt accru pour la médecine des

La fragilité est un syndrome, plus fréquent avec le vieillissement, dans lequel le patient a une réserve fonctionnelle réduite qui conduit à un déclin des performances physiologiques et cognitives et à une plus grande vulnérabilité aux problèmes de santé.

chats âgés, nous présentons des conseils actualisés dans ce « Guide de recommandations 2021 de l'AAFP sur les soins apportés aux chats âgés ».

Nous considérons que le terme « âgé » est un terme qui décrit l'âge. Alors que le terme « âgé » est utilisé pour désigner les chats âgés de plus de 10 ans dans le « Guide de recommandations 2021 de l'AAHA/AAFP sur les différentes étapes de la vie féline »,<sup>2</sup> certains chats peuvent être considérés comme âgés dès l'âge de 8 ans, voire plus tôt pour certaines races ou ceux qui présentent des prédispositions génétiques.<sup>3,4</sup> Le groupe de travail estime que le terme « gériatrique » désigne plutôt un état de santé et n'est pas associé à un âge spécifique. Le groupe de travail

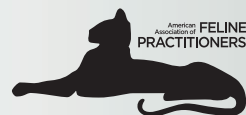

**Michael Ray**  
DVM

*Co-président\**  
The Cat Clinic of Roswell,  
Roswell, GA, USA

**Hazel C Carney**  
DVM, MS, DABVP

(Canin/Félin)  
*Co-président\**  
WestVet Emergency and  
Specialty Center, Garden  
City, ID, USA

**Beth Boynton**  
DVM

College of Veterinary  
Medicine,  
Western University of Health  
Sciences, Pomona, CA,  
USA

**Jessica Quimby**

DVM, PhD, DACVIM  
The Ohio State University,  
Department of Veterinary  
Clinical Sciences,  
Columbus, OH, USA

**Sheilah Robertson**

BVMS (Hons), PhD,  
DACVAA, DECVA,  
DACA, DECAWBM  
(WSEL), MRCVS  
Senior Medical Director,  
Lap of Love Veterinary  
Hospice, Lutz, FL, USA

**Kelly St Denis**

MSc, DVM, DABVP (Feline)  
Brantford, ON, Canada

**Helen Tuzio**

DVM, DABVP (Feline), CVA  
Forest Hills Cat Hospital,  
Middle Village, NY, USA

**Bonnie Wright**

DVM, DACVAA  
Mistralvet, Johnstown,  
CO, USA

\*Auteurs correspondants :  
mray@catclinicofroswell.com  
hcccats@gmail.com

| CONTENU                                                                                    | page |
|--------------------------------------------------------------------------------------------|------|
| ❖ Introduction                                                                             | 613  |
| ❖ La visite de bien-être du chat âgé                                                       | 614  |
| – Collecte d'informations :<br>comprendre les préoccupations<br>du propriétaire et du chat | 614  |
| – L'examen physique du chat âgé                                                            | 616  |
| ❖ Diagnostics recommandés                                                                  | 618  |
| ❖ Outils de prise en charge optimisant<br>la santé du chat vieillissant                    | 619  |
| ❖ Problèmes concomitants à prendre<br>en compte chez le chat vieillissant                  | 621  |
| – Anesthésie                                                                               | 621  |
| – Hypertension                                                                             | 621  |
| – Maladie rénale chronique                                                                 | 621  |
| – Hyperthyroïdie                                                                           | 623  |
| – Diabète sucré                                                                            | 623  |
| – Maladie dentaire                                                                         | 623  |
| – Maladie gastro-intestinale                                                               | 624  |
| – Cancer                                                                                   | 624  |
| – Sources permanentes de douleur                                                           | 625  |
| – Syndrome de dysfonctionnement<br>cognitif                                                | 626  |
| ❖ Prise en charge des maladies complexes                                                   | 626  |
| ❖ La qualité de vie                                                                        | 629  |
| – Changements environnementaux                                                             | 630  |
| ❖ Fin de vie                                                                               | 630  |
| – Les soins palliatifs et en hospices                                                      | 630  |
| – Les budgets alloués aux soins                                                            | 631  |
| – Prise de décisions éthiques et<br>conversations difficiles                               | 631  |
| – Le deuil anticipé                                                                        | 631  |
| – L'euthanasie                                                                             | 631  |
| ❖ Points clés                                                                              | 632  |
| ❖ Autres documents                                                                         | 632  |
| ❖ Références                                                                               | 633  |
| ❖ Annexe : Brochure destinée aux clients                                                   | 637  |

**L'évaluation  
de routine  
facilite les  
consultations  
médicales  
et la détection  
précoce  
des maladies.  
Elle est moins  
coûteuse et  
plus efficace  
que la gestion  
de la crise.**

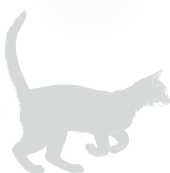

reconnaît également le nouveau concept de « fragilité », qui joue un rôle important dans la prise en charge des personnes âgées et qui devient de plus en plus important en médecine féline.

Ces recommandations mettent l'accent sur l'examen des chats et la consultation du propriétaire, qui ensemble permettent de mieux comprendre les besoins de chaque chat. Elles insistent sur le fait que l'implication du propriétaire dans l'évaluation d'un chat âgé est cruciale et a un impact sur notre interprétation des résultats cliniques. Bien que nous abordions brièvement les maladies individuelles, nous nous concentrons sur les patients individuels et sur la façon dont le processus de vieillissement influence leur bien-être. Nous discutons de l'apparition fréquente de comorbidités et de la manière dont elles rendent les soins apportés aux chats âgés plus complexes. Nous souhaitons également souligner que les chats âgés sont souvent confrontés à une ou plusieurs sources de douleur chronique. Le groupe de travail propose que la douleur soit considérée comme une maladie en soi qui peut grandement influencer la qualité de vie. De plus, puisque la priorité numéro un est d'éduquer les propriétaires de chats pour améliorer la qualité de vie de ces patients, nous proposons des solutions pratiques à des situations de santé multifactorielles. Les scénarios difficiles comprennent les soins de fin de vie avec les interactions entre l'hospice, l'euthanasie et la reconnaissance de ce que le propriétaire du chat peut assumer en termes de charges.

Pour répondre au mieux à ces demandes, nous encourageons les vétérinaires à examiner de plus près le processus de vieillissement, et pas seulement le diagnostic individuel. En fin de compte, nous espérons améliorer les connaissances des propriétaires et des vétérinaires sur les chats âgés, et augmenter le niveau des soins vétérinaires pour les chats âgés.

## La visite de bien-être du chat âgé

### Collecte d'informations : comprendre les préoccupations du propriétaire et du chat

De nombreux chats domestiques ont vu leur espérance de vie augmenter grâce à l'amélioration des soins vétérinaires, à une meilleure alimentation et à des propriétaires mieux informés et motivés. Cela donne aux vétérinaires la possibilité d'adopter une approche globale de l'évaluation et de la gestion des chats âgés. En apprenant aux clients à apprécier les changements subtils qui peuvent indiquer un trouble latent, ceux-ci peuvent s'associer au vétérinaire pour observer de plus près leurs compagnons félins. L'évaluation de routine facilite le maintien de la santé et la détection précoce des maladies, ce qui facilite souvent la prise en charge et la prévention des maladies, et peut conduire à une meilleure qualité de vie ; elle est moins coûteuse et plus efficace que la gestion de crise.

Idéalement, prévoyez des rendez-vous plus longs pour les consultations des chats âgés. Bien que nous soyons souvent dans l'optique de défendre les intérêts des chats, une compréhension des moyens, des

### ABRÉVIATIONS

|                                                        |                                                |
|--------------------------------------------------------|------------------------------------------------|
| ❖ AINS (anti-inflammatoires non stéroïdiens)           | ❖ MRC (maladie rénale chronique)               |
| ❖ BER (besoins énergétiques au repos)                  | ❖ PA (pression artérielle)                     |
| ❖ BEQ (besoins énergétiques quotidiens)                | ❖ QVLS (qualité de vie)                        |
| ❖ DFG (débit de filtration glomérulaire)               | ❖ QVS (qualité de vie liée à la santé)         |
| ❖ DS (diabète sucré)                                   | ❖ RPCU (rapport protéines/créatinine urinaire) |
| ❖ GI (gastro-intestinal)                               | ❖ SCC (score de condition corporelle)          |
| ❖ HT (hyperthyroïdie féline)                           | ❖ SCM (score de condition musculaire)          |
| ❖ MDA (maladie dégénérative des articulations)         | ❖ SDC (syndrome de dysfonctionnement cognitif) |
| ❖ MICI (maladie inflammatoire chronique de l'intestin) | ❖ SDMA (diméthylarginine symétrique)           |
|                                                        | ❖ T4 (hormone thyroïdienne)                    |
|                                                        | ❖ ITU (infection du tractus urinaire)          |

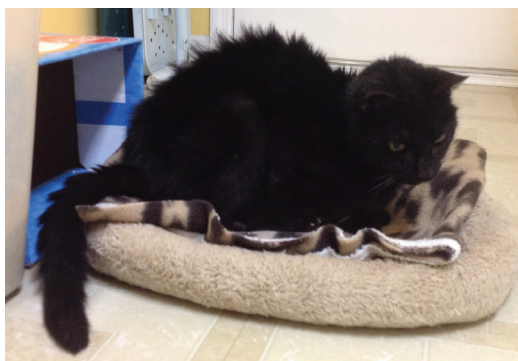

**Figure 1** Ce chat de 15 ans présente une diminution de ses activités de toilettage. Avec l'aimable autorisation de Sheilah Robertson

capacités, des comportements et des croyances du client nous permet de répondre à ses préoccupations. L'envoi d'un questionnaire à remplir à l'avance et la vérification des objectifs du client au début de la visite facilitent cette compréhension. Poser des questions ouvertes sur tous les systèmes du corps permet d'obtenir des résultats importants. Les observations du client peuvent aider le vétérinaire à détecter des changements subtils ; toutefois, de nombreux clients ne sont pas conscients de changements graduels tant que nous ne posons pas de questions ciblées. Les vidéos enregistrées par le client sur les activités du patient à la maison peuvent fournir des informations supplémentaires sur l'état de santé du chat. L'obtention d'une anamnèse systématique et approfondie peut prendre un peu plus de temps au départ, mais elle permet souvent d'obtenir un diagnostic plus précis et des soins efficaces pour le chat âgé.

Les membres du groupe de travail prennent en compte les éléments clés suivants lors de l'élaboration d'un plan visant à déterminer le statut du chat :

- ❖ **Environnement** : Comment le lieu de vie du chat est structuré ; quelles autres personnes/ animaux partagent l'espace ; le temps que le chat passe à l'extérieur (en liberté, en laisse, dans un enclos extérieur) ; si le chat doit utiliser des escaliers ; la routine d'alimentation et l'emplacement des postes d'alimentation ; la position, les habitudes et les lieux de couchage ; le nombre de litières, leur type et leur emplacement.

- ❖ **Alimentation** : Produits spécifiques donnés, quantité consommée (apport calorique) ; supplé-

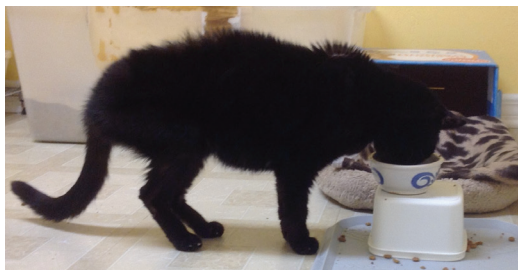

**Figure 3** Même chat âgé que dans la figure 1, présentant des signes de fragilité, notamment une perte de masse et de force musculaires. Le diagnostic de sarcopénie, d'ostéoartrite et d'hyperthyroïdie a été posé. Avec l'aimable autorisation de Sheilah Robertson

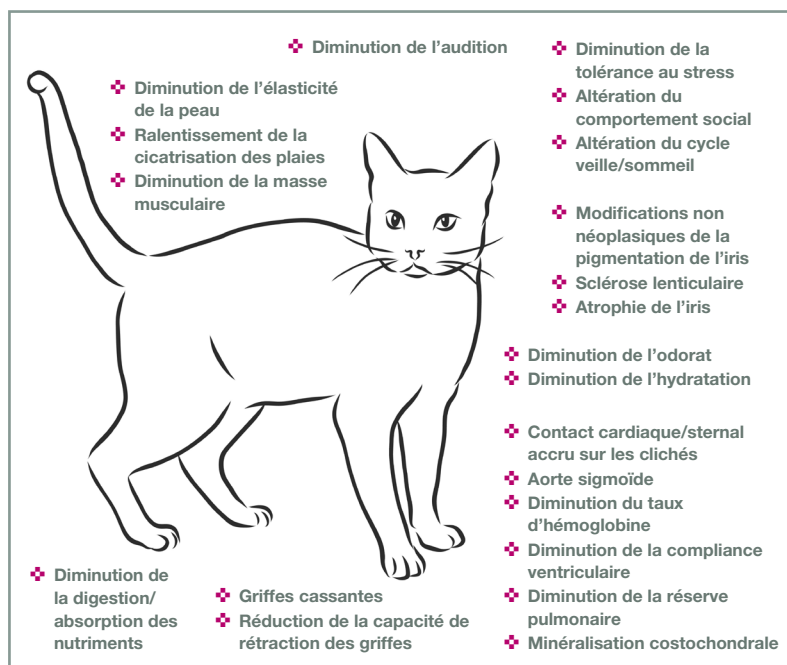

**Figure 2** Changements associés au vieillissement (et souvent observés chez des chats âgés).

**Bien que vieillir en bonne santé ait des significations différentes selon les personnes, tant pour elles-mêmes que pour leurs chats, le confort et la joie de vivre sont probablement des éléments communs à tous.**

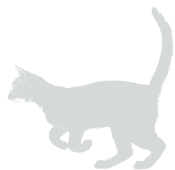

ments et/ou médicaments donnés ; apport provenant de proies ou d'autres sources de nourriture ; nutraceutiques à visée préventive ; observations du comportement de mastication ; estimation de la consommation d'eau.

- ❖ **Éliminations** : Lieux de miction et de défécation, fréquence et quantité (taille des boules de litière, quantité de selles émises, score fécal) ; toute apparition soudaine d'un comportement inhabituel (par exemple, malpropreté) chez le patient actuel ou un autre chat (peut refléter une maladie latente) ; un chat peut également détecter une maladie chez un compagnon si la maladie modifie l'odeur de ce dernier ou de ses émonctoires.

- ❖ **Schémas d'activités** : Les habitudes de toilettage (Figure 1), les vocalisations et les interactions avec d'autres animaux ou personnes ; le comportement et les lieux de couchage ; la réponse aux signaux visuels et aux sons ; le comportement de saut et de jeu (inviter les clients à conserver des enregistrements vidéo dès le plus jeune âge permettra de comparer les niveaux d'activité actuels).

Les vétérinaires citent souvent l'adage « La vieillesse n'est pas une maladie », mais c'est un processus. Comme pour toutes les espèces, des changements sont observés chez le chat âgé (Figure 2).

La perte de masse musculaire chez les chats âgés a des conséquences importantes sur leur état de santé. La cachexie fait référence à la perte de poids en présence d'une maladie latente.<sup>5</sup> La sarcopénie fait référence à la perte de masse musculaire en tant que syndrome associé au vieillissement, indépendamment de la maladie.<sup>5</sup> La sarcopénie comprend une perte de masse et de force musculaires (Figure 3). Cela peut se manifester par une diminution des sauts et de la force physique, ainsi que par une réduction de l'activité et des interactions. Les manifestations physiques de la

sarcopénie coïncident avec les manifestations physiologiques de la fragilité. Compte tenu de l'association de la sarcopénie à une évolution défavorable, la reconnaissance des signes de fragilité féline est particulièrement importante.<sup>6</sup> Explorez les causes pathologiques potentielles lorsque des signes de fragilité sont détectés. Même si aucune maladie n'est détectée, des interventions thérapeutiques précoces peuvent aider à restaurer certaines fonctions.

Une adaptation nutritionnelle peut être bénéfique. Les régimes alimentaires hautement digestibles, riches en antioxydants et en acides gras oméga-3<sup>7</sup>, ainsi que les jouets, les puzzles interactifs et l'enrichissement de l'environnement<sup>8,9</sup> peuvent tous contribuer à ralentir le développement de la sarcopénie.

Une variation inexpliquée du poids corporel, du score de la condition corporelle (SCC) et/ou du score de condition musculaire (SCM) sont des problèmes qui doivent être examinés et gérés comme des maladies. Considérez les changements de poids en tenant compte de la taille du chat. Les chats de petit format ne changeront peut-être pas beaucoup de manière absolue, mais un changement proportionnel peut être significatif. La composition corporelle change même à poids constant, c'est la raison pour laquelle l'évaluation simultanée du SCM et du SCC est essentielle. De plus amples informations sur la notation de la condition corporelle et de la condition musculaire sont fournies par la Société internationale de médecine féline (ISFM ; [www.bit.ly/ISFMMCS](http://www.bit.ly/ISFMMCS)). Les chats en surpoids et en sous-poids présentent des risques sanitaires associés.<sup>9,10</sup>

### L'examen physique du chat âgé

Les personnes en bonne santé sont encouragées à passer des examens de santé tous les ans. La durée

Le groupe de travail recommande des examens deux fois par an pour les chats âgés de 10 à 15 ans, avec des examens tous les 4 mois pour les vieux chats en bonne santé au-delà de 15 ans. Ceux qui souffrent de problèmes de santé chroniques peuvent avoir besoin d'être examinés plus fréquemment, en fonction de la gravité et de la stabilité de leurs affections.

de vie d'un chat est cinq fois plus courte que celle d'un humain, donc une fréquence équivalente chez un chat adulte en bonne santé serait toutes les 10 à 11 semaines ! Bien que cela ne soit pas toujours pratique, cela souligne la nécessité d'effectuer plus

**L'évolution inexpliquée du poids corporel, du score de condition corporelle (SCC) et/ou du score de condition musculaire (SCM) sont des problèmes qui doivent être examinés et gérés comme des maladies.**

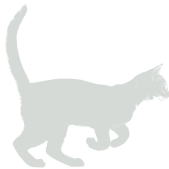

d'un examen annuel (Encadré 1). La capacité innée du chat à cacher ses maladies rend l'examen physique régulier d'autant plus important chez le chat âgé.

Les chats, en particulier âgés, doivent être manipulés avec douceur. Si l'on sait à l'avance que le chat peut être douloureux ou que l'examen sera particulièrement douloureux, l'analgésie est appropriée et recommandée, comme décrit dans le « Guide de recommandations de la gestion de la douleur de l'AAHA/AAFP en 2015 ».<sup>12</sup> Fournissez aux patients qui s'opposent à la manipulation en raison du stress ou de la douleur des analgésiques et/ou des anxiolytiques. Si le stress ou la douleur ne peuvent être contrôlés de manière adéquate et sûre, il peut être nécessaire d'abandonner et de reprogrammer l'examen.

Un examen approfondi commence par une observation à distance. Une simple observation peut aider à détecter des changements dans les schémas respiratoires, la démarche, la posture, la force, la coordination et la vision. En pratique, l'examen physique peut être effectué dans n'importe quel ordre, à condition qu'il soit approfondi et que les zones douloureuses soient examinées en dernier. Pour réduire le stress, gardez pour la fin les parties les plus invasives de l'examen, comme l'examen dentaire, la prise de température ou la coupe des griffes, les divers prélèvements et les examens d'imagerie.<sup>2</sup>

La mesure de la pression artérielle (PA) à chaque examen, en particulier pour les chats âgés de plus de 10 ans, fournit des informations essentielles. Le risque d'hypertension augmente avec l'âge<sup>13,14</sup> et est souvent observée chez les chats de 10 ans et plus.<sup>15</sup> Si elle n'est pas traitée, l'hypertension peut provoquer de graves lésions des organes cibles (les yeux, le cœur, le cerveau et les reins<sup>16,17</sup>) qui peuvent être irréversibles. Des mesures de routine à chaque examen peuvent aider à réduire l'hypertension situationnelle.

Des informations détaillées sur le protocole standard de mesure de la pression artérielle systémique chez le chat sont disponibles dans le kit pédagogique sur l'hypertension de l'AAFP<sup>18</sup> et dans les « Directives de consensus de l'ISFM sur le diagnostic et la prise en charge de l'hypertension chez le chat ».<sup>17</sup> Les vidéos de mesure de la pression artérielle produites par l'ISFM sont disponibles sur [www.youtube.com/user/iCatCare](http://www.youtube.com/user/iCatCare).

Des soins optimaux ne peuvent être planifiés que si le poids corporel du chat est mesuré, et si le SCC et le SCM sont déterminés, à chaque visite.

Chez le chat âgé, l'état d'hydratation est extrêmement important car certaines des comorbidités les plus courantes, comme la maladie rénale chronique (MRC) et le diabète sucré (DS), entraînent une perte progressive de liquide corporel. La perte de graisse sous-cutanée et/ou d'élasticité des tissus peut influencer l'interprétation des résultats du pli de peau (tente cutanée) et l'humidité des muqueuses pourrait être plus indicative de l'état d'hydratation.

L'évaluation de la peau, des griffes et du pelage implique une attention particulière à la qualité des griffes, qui ont tendance à s'épaissir et à s'incerner.

### Encadré 1 //

#### L'examen commence à la maison

Il est important d'apprendre aux clients que le début d'un rendez-vous d'examen commence à la maison. Les chats forcés à entrer dans une caisse de transport ou ballottés par la poignée de la cage peuvent présenter le mal des transports, de l'hypertension ou d'autres signes de stress qui nuisent aux résultats de l'examen physique et des analyses sanguines. L'utilisation des techniques décrites dans les « Guide de recommandations l'AAFP et de l'ISFM sur les méthodes appropriées de manipulations des chats » contribuera à réduire le stress. Lorsque les visites des patients se déroulent bien, les clients sont plus calmes et plus enclins à prendre rendez-vous pour une évaluation plus approfondie des problèmes médicaux.

Proposer des rendez-vous pour faire couper les griffes par un.e assistant.e constitue une possibilité pour les propriétaires qui ne sont pas en mesure de le faire régulièrement. Les changements de la qualité des griffes peuvent être particulièrement problématiques pour les chats arthrosiques, trop douloureux pour utiliser un griffoir.

Un examen approfondi du nez et de la bouche comprend la palpation des contours nasaux et la visualisation de la gencive, du pharynx, du palais, de la région sublinguale et des dents, en prenant soin de détecter une perte de dents inhabituelle. De plus, la palpation de la zone située entre et sous les mandibules peut permettre d'identifier des tumeurs ou des adénopathies. Toute asymétrie constatée lors de l'évaluation de la tête justifie un examen plus approfondi.

L'évaluation ophtalmique comprend un examen attentif des chambres antérieure et postérieure, de la couleur et de la forme de l'iris, ainsi que de la zone rétinienne. Les lésions courantes qui progressent avec le vieillissement sont la sclérose lenticulaire, l'atrophie de l'iris, la mélanose de l'iris, les cataractes focales ou linéaires<sup>19,20</sup> et la production variable de larmes.<sup>21,22</sup> La visualisation de la rétine est particulièrement importante pour la détection précoce de changements vasculaires ou d'œdème, qui sont des signes annonciateurs d'hypertension et de décollement ultérieur<sup>22-24</sup> de la rétine. Des évaluations séquentielles de l'œil et des images concomitantes de lésions, ou de changements de couleur et de structure, alerteront très tôt le praticien sur la possibilité de développer une néoplasie, et permettront potentiellement un traitement salvateur.

La palpation du cou du chat, lorsqu'il est assis avec le cou étendu ou debout avec la tête élevée et tournée de chaque côté, révélera une glande thyroïde palpable, dans 80 % ou plus des cas d'hyperthyroïdie féline (HT) ; cependant, un nodule palpable peut également être identifié chez les chats souffrant d'une maladie non thyroïdienne.<sup>25-27</sup>

Écoutez les quatre quadrants du thorax pendant l'auscultation thoracique pour déterminer la fréquence cardiaque et respiratoire, identifier les souffles cardiaques ou les arythmies et évaluer les bruits pulmonaires. Le thorax crânial doit être compressible ; les masses médiastinales crânielles peuvent réduire la compressibilité (c'est-à-dire l'absence de ressort des côtes crâniennes).

En procédant avec douceur, essayez de palper chaque organe pendant la palpation abdominale, en notant les signes de douleur ou de masses, les zones d'intestin épaissi, la quantité et la consistance des selles, la texture, la forme et la taille des reins et de la vessie, ainsi que la taille et l'emplacement des ganglions lymphatiques identifiables. La palpation de la chaîne mammaire peut être ajoutée à l'examen abdominal.

Un examen orthopédique peut aider à identifier les changements dans les articulations, y compris un épaississement, la présence de liquide, la crépitation, la douleur et l'amplitude des mouvements. Palpez délicatement les membres et les articulations individuellement pour détecter une épaisseur

ou une sensibilité. Certains chats peuvent ne pas présenter de douleur ou de crépitation à la palpation. Évaluez la masse musculaire et attribuez un SCM. Prêtez une attention particulière aux zones d'atrophie musculaire car elles peuvent indiquer des conditions douloureuses localisées. Les zones de nœuds (poil piqué) ou de toilettage excessif peuvent indiquer une douleur latente. Une perte globale de la masse musculaire semble davantage indiquer une maladie systémique.

Un examen myofascial est utile pour évaluer la viscosité, la mobilité, la température et le confort des structures des tissus mous. S'il est effectué correctement, l'examen est une approche apaisante, douce et inquisitrice pour évaluer la douleur qui peut avoir de multiples causes, d'origine arthrosique, vertébrale, myofasciale et viscérale. L'examen myofascial repose sur la palpation des tissus mous tout en étant attentif aux indicateurs subtils de la douleur tels que les changements de posture du corps, l'expression de la face, les schémas de tension dans les muscles ou les fascias, l'adhérence de la peau et la chaleur. La douleur détectée lors d'un examen myofascial peut provenir de la surface palpée ou refléter une douleur provenant des viscères internes situés plus profondément sous la surface.

Une vidéo de démonstration de l'examen myofascial est incluse dans le matériel complémentaire (voir page 632).

**Tableau 1** Diagnostics recommandés pour les chats âgés

| Tests de base                                                                                                                                                                                                                                   | Tests auxiliaires*                                                                                                                                                                                                      |
|-------------------------------------------------------------------------------------------------------------------------------------------------------------------------------------------------------------------------------------------------|-------------------------------------------------------------------------------------------------------------------------------------------------------------------------------------------------------------------------|
| <b>Hémogramme complet :</b><br>hématocrite, globules rouges, globules blancs formule-numération, plaquettes                                                                                                                                     | Anticorps/antigène de la dirofilariose cardiopulmonaire<br>Virus leucémogène félin (FeLV), virus de l'immunodéficience féline (FIV), tests ELISA, provirus du FeLV PCR <sup>28</sup><br>Lecture du frottis sanguin      |
| <b>Panel biochimique sérique :</b><br>protéines totales, albumine, globuline, phosphatase alcaline, alanine aminotransférase, glucose, urée, créatinine, potassium, phosphore, sodium et calcium en tant que paramètres de base                 | Calcium ionisé/hormone parathyroïdienne (PTH)/Peptide apparenté à la PTH<br>Cobalamine (B12)/folate<br>Lipase pancréatique spécifique féline<br>Fructosamine<br>NT-pro BNP<br>SDMA<br>Immunoréactivité de type trypsine |
| <i>Paramètres optionnels souvent inclus dans les panels commerciaux couramment disponibles : aspartate transaminase, gamma-glutamyl-transférase, créatine kinase, bilirubine totale, chlorure, HCO<sub>3</sub> ou CO<sub>2</sub>, magnésium</i> |                                                                                                                                                                                                                         |
| <b>Analyse de l'urine :</b> densité urinaire, sédiments, glucose, cétones, bilirubine, protéine, pH urinaire                                                                                                                                    | ECBU (culture/sensibilité de l'urine)<br>Rapport protéine/créatinine urinaire                                                                                                                                           |
| <b>Total de T4<sup>†</sup></b>                                                                                                                                                                                                                  | T4 libre/TSH                                                                                                                                                                                                            |
| <b>Pression artérielle<sup>†</sup></b>                                                                                                                                                                                                          | Analyse fécale (centrifugation)                                                                                                                                                                                         |
|                                                                                                                                                                                                                                                 | Échocardiogramme<br>Électrocardiogramme<br>Radiographie<br>Échographie                                                                                                                                                  |

\*Peut être indiqué par l'état de santé du patient et/ou les résultats des tests de base

<sup>†</sup>Voir discussion dans le texte

Enfin, comparez tous les paramètres avec ceux du dernier examen afin d'identifier les tendances comme indicateurs précoces d'une maladie ou d'un processus dégénératif.

### Diagnostiques recommandés

Des examens réguliers (cliniques et complémentaires) peuvent aider à détecter une maladie préclinique et servir de point de référence pour suivre les tendances futures. Envisagez des diagnostics de base performants (Tableau 1) au moins une fois par an, à partir de l'âge de 7 à 10 ans, la fréquence augmentant avec l'âge.

La fréquence de nombreuses maladies augmente avec le vieillissement des chats, et les comorbidités sont fréquentes. Des données plus solides sur la fréquence des maladies en fonction de l'âge aideraient les vétérinaires à déterminer la valeur et la fréquence souhaitée des tests, mais ces données font défaut. Les vétérinaires doivent donc s'appuyer sur un jugement clinique et des discussions spécifiques avec le client, à chaque patient.

Peu importe l'âge du chat, une évaluation diagnostique plus fréquente ou plus étendue (Tableau 1) est indiquée si :

- ❖ Toute anomalie est notée à l'anamnèse ou à l'examen physique, même si les analyses de base de laboratoire semblent normales.

- ❖ Une maladie est suspectée ou révélée lors des visites vétérinaires de routine.
- ❖ Des comorbidités existent et nécessitent une surveillance supplémentaire.
- ❖ Des médicaments sont prescrits.

Une évaluation et un diagnostic peuvent être nécessaires tous les 3 à 6 mois chez les patients très âgés, ceux qui bénéficient d'une prise en charge médicale chronique et ceux qui présentent des comorbidités multiples.

En cas de doute sur une maladie suspectée ou des anomalies subtiles, réévaluez le patient pour établir la persistance et/ou la progression de l'anomalie. Les tendances des données biométriques du chat fournissent des informations précieuses et sont plus importantes qu'un paramètre isolé. Il faut considérer le patient dans son ensemble et voir les tendances dans leur contexte. Par exemple, l'augmentation progressive de la pression artérielle au fil du temps peut aider à

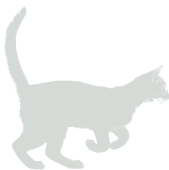

**Les tendances des données biométriques fournissent des informations inestimables et sont plus importantes qu'un paramètre isolé. Il faut considérer le patient dans son ensemble et voir les tendances dans leur contexte.**

**La douleur peut être difficile à identifier chez les chats. Avec des conseils appropriés, les clients peuvent apprendre à détecter des changements dans la mobilité normale et les patterns comportementaux de leur chat qui sont des signes de douleur.**

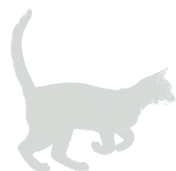

**Tableau 2** Identifier les signes subtils de la douleur à domicile et en consultation

| À la maison | Schémas de comportement              | <ul style="list-style-type: none"> <li>❖ Changements dans les interactions avec la famille, les visiteurs, les autres animaux de la famille</li> <li>❖ Diminution de l'appétit et de la prise alimentaire</li> <li>❖ Diminution du jeu</li> <li>❖ Croissance excessive des griffes signalant une diminution des comportements de grattage</li> <li>❖ Changements dans les routines normales</li> </ul>                                                                         |
|-------------|--------------------------------------|--------------------------------------------------------------------------------------------------------------------------------------------------------------------------------------------------------------------------------------------------------------------------------------------------------------------------------------------------------------------------------------------------------------------------------------------------------------------------------|
|             | Mobilité                             | <ul style="list-style-type: none"> <li>❖ Changement des lieux de couchage habituels</li> <li>❖ Augmentation du sommeil</li> <li>❖ Diminution des sauts</li> <li>❖ Difficulté à monter les escaliers, à utiliser des surfaces intermédiaires pour atteindre des surfaces plus élevées ou à ne pas se rendre du tout à ces surfaces</li> <li>❖ Glissement sur le bord des surfaces pour réduire la hauteur de saut.</li> <li>❖ Malpropreté</li> <li>❖ Boiterie (rare)</li> </ul> |
|             | Réaction au toucher                  | <ul style="list-style-type: none"> <li>❖ Changements dans les préférences de caresses</li> <li>❖ Aversion soudaine pour le toilettage, peut être seulement à un endroit précis</li> <li>❖ Réaction/refus soudain lorsque soulevé</li> </ul>                                                                                                                                                                                                                                    |
| En pratique | Personnalité                         | <ul style="list-style-type: none"> <li>❖ Changement de comportement : plus ou moins facile à approcher</li> <li>❖ Se cache dans un sac de transport alors qu'auparavant il sortait volontiers</li> </ul>                                                                                                                                                                                                                                                                       |
|             | Mobilité                             | <ul style="list-style-type: none"> <li>❖ Modification de la démarche</li> <li>❖ Changements dans les sauts (ne saute plus sur la table d'examen, difficulté à monter sur la chaise de la salle d'examen, etc.)</li> <li>❖ Changements dans les comportements exploratoire</li> </ul>                                                                                                                                                                                           |
|             | Apparence                            | <ul style="list-style-type: none"> <li>❖ Signes de perte musculaire</li> <li>❖ Preuve d'une augmentation ou d'une diminution du toilettage (alopécie, tapis, pelage terne)</li> <li>❖ Excroissance des griffes</li> </ul>                                                                                                                                                                                                                                                      |
|             | Réaction au toucher                  | <ul style="list-style-type: none"> <li>❖ Refuse d'être caressé ou touché lors de l'examen</li> </ul>                                                                                                                                                                                                                                                                                                                                                                           |
|             | Capacité à réaliser des prélèvements | <ul style="list-style-type: none"> <li>❖ Absence de coopération pour le prélèvement de sang ou d'urine</li> <li>❖ Changements de comportement par rapport à la situation antérieure (par exemple, n'est plus à l'aise pour la prise de sang dans les membres postérieurs)</li> </ul>                                                                                                                                                                                           |

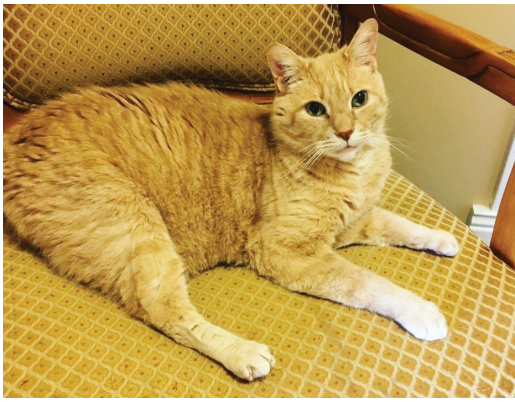

**Figure 4** Ce chat de 12 ans atteint de MDA est couché avec le grasset et le jarret en extension pour être plus confortable. Avec l'aimable autorisation de Kelly St Denis

différencier une hypertension situationnelle d'une véritable hypertension nécessitant un traitement médical.

Les données biométriques peuvent également être plus robustes lorsque plusieurs tests sont utilisés conjointement. Par exemple, lors de l'évaluation de la présence d'une MRC, l'utilisation de toutes les informations disponibles - résultats de l'examen physique, créatinine sérique, densité urinaire, diméthylarginine symétrique (SDMA) et algorithmes diagnostiques prédictifs, dont certains deviennent disponibles sous forme de services exclusifs (par exemple, RenalTech ; Antech Diagnostics) - est plus puissante que la simple évaluation de la concentration de créatinine sérique.

### Outils de prise en charge optimisant la santé du chat vieillissant

Le vétérinaire peut encourager, par l'éducation et la conversation avec le client, un mode de vie sain de son chat âgé. Il faut veiller à rendre l'environnement familial adapté aux chats âgés, aider le propriétaire à comprendre les besoins de son chat âgé et lui fournir des conseils nutritionnels. En l'absence de contre-indications, il convient de recom-

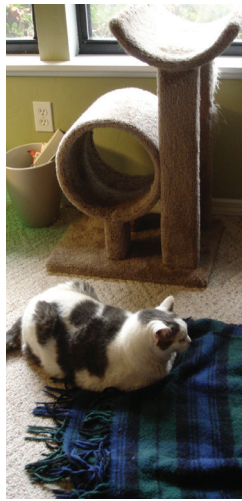

**Figure 5** Lorsque ce chat de 11 ans n'a plus voulu sauter pour s'asseoir sur l'arbre à chat, il a été examiné et son arthrose diagnostiquée. Avec l'aimable autorisation de Shellah Robertson

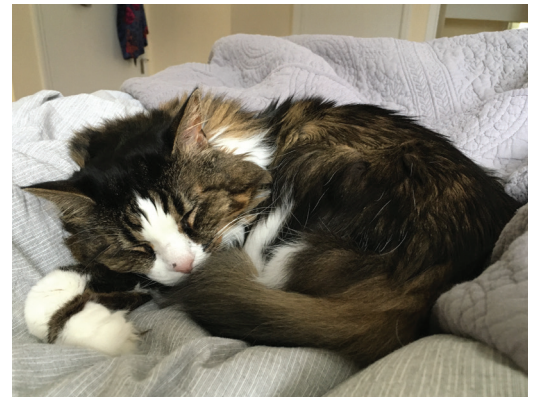

**Figure 6** Des améliorations subtiles du rythme de sommeil ont été notées chez ce chat de 19 ans. Avec l'aimable autorisation de Kathleen Neumann

mander des soins préventifs, notamment des vaccinations de routine, des traitements anti-parasitaires et des soins dentaires.

L'ostéoarthrite et la spondylose déformante sont les deux formes les plus courantes de maladies dégénératives articulaires (MDA) chez les chats (Figure 4).<sup>29</sup> Ces deux affections peuvent provoquer de la douleur et des changements de comportement associés à la douleur.<sup>29,30</sup> La douleur peut être difficile à identifier chez les chats. Avec des conseils appropriés, les clients peuvent apprendre à détecter des changements de la mobilité normale et les patterns comportementaux de leur chat qui sont des signes de douleur (Tableau 2). Les changements de mobilité peuvent être subtils, notamment les sauts, la malpropreté à la maison, les lieux de couchage différents et l'augmentation du nombre de couchages (Figures 5 et 6).

Étant donné que l'âge entraîne un risque accru de MDA<sup>31</sup> et d'autres changements, notamment un dysfonctionnement cognitif, une diminution des sens, un état de « pré-fragilité » ou de fragilité, et des problèmes de santé potentiels, tous les chats âgés auront besoin de soins renforcés à domicile. Si l'âge seul n'est pas un facteur de risque de fragilité, la fragilité devient plus fréquente avec l'âge. Adaptez les soins à chaque chat, en vous référant aux cinq piliers d'un environnement félin sain (voir plus loin).<sup>8</sup> Sensibilisez les clients à l'importance de fournir des ressources clés, notamment des bacs à litière, des gamelles, de l'eau potable, des lits, des griffoirs, des cachettes et des espaces tridimensionnels à plusieurs endroits de la maison.<sup>8,9</sup> Encouragez les clients à s'équiper d'objets qui aident le chat âgé, notamment des veilleuses pour améliorer la visibilité dans les zones sombres, des rampes et des marches pour faciliter l'accès aux espaces favoris (Figure 7) et une variété de surfaces et de lieux de couchage. Les bols de nourriture et d'eau, à bords bas et à base large, qui n'interfèrent pas avec les moustaches, sont idéaux pour les chats âgés.<sup>32</sup> Les chats âgés devraient avoir un accès sécurisé à la nourriture avec un minimum de distractions et d'interruptions. La surélévation des bols de nourriture peut être bénéfique pour les chats atteints de MDA, et les aliments tiédifiés et/ou aromatisés peuvent les inciter à manger.

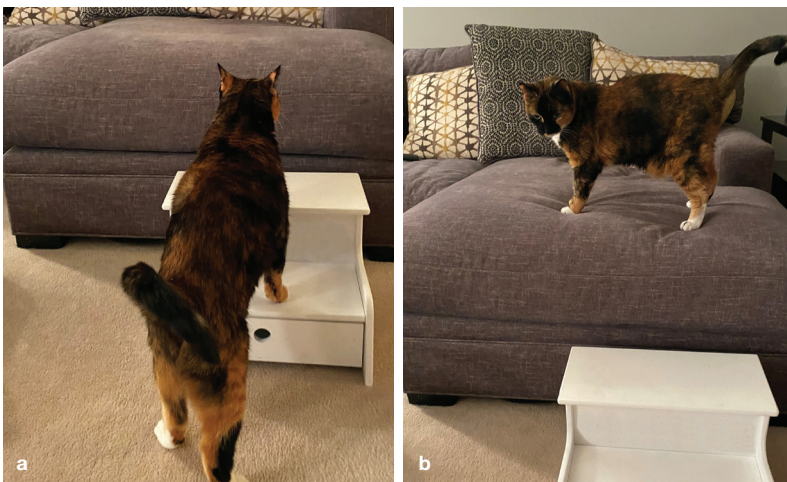

**Figure 7** (a,b) Ce chat de 14 ans atteint de MDA douloureuse utilise des marches pour accéder à son lieu de couchage favori. Avec l'aimable autorisation d'Heather O'Steen

## Encadré 2

## Échelles de fragilité

## Échelle de fragilité phénotypique

| Conditions/problèmes médicaux présents | Oui | Non |
|----------------------------------------|-----|-----|
| 1 Perte de poids involontaire          |     |     |
| 2 Faiblesse                            |     |     |
| 3 Faible endurance, épuisement précoce |     |     |
| 4 Lenteur et faible activité           |     |     |

**Pré-fragile :** « Oui » à 2 sur 4. **Fragile :** « Oui » à 3 ou 4 sur 4

Adapté de Fried et al<sup>34</sup>

## Échelle de fragilité indicielle

| Conditions/problèmes médicaux présents        | Oui | Non |
|-----------------------------------------------|-----|-----|
| 1 Déficits physiologiques                     |     |     |
| 2 Déficits psychologiques (émotionnels)       |     |     |
| 3 Déficits cognitifs (orientés vers la tâche) |     |     |
| 4 Déficits de la fonction sociale             |     |     |

**Pré-fragile :** « Oui » à 2 sur 4. **Fragile :** « Oui » à 3 ou 4 sur 4

Adapté de Mitnitski et al<sup>35</sup>

Les échelles de fragilité étant de mieux en mieux définies (Encadré 2), les interventions visant à maintenir le chat âgé actif et autonome peuvent être mises en place dans l'environnement familial. Bien que l'âge seul ne soit pas un facteur prédictif fiable de la fragilité, de nombreux facteurs de fragilité deviennent plus fréquents avec l'âge avancé.<sup>33</sup> Comme cela a été établi pour les échelles de fragilité en médecine humaine, les mesures de fragilité doivent permettre d'identifier les sujets fragiles, être étayées par une théorie causale biologique et prédire de manière fiable l'évolution clinique défavorable et la réponse du patient au traitement et aux facteurs de stress. Dans le but d'identifier les facteurs de fragilité, le lecteur peut utiliser l'« échelle de fragilité phénotypique »<sup>34</sup> et l'« échelle de fragilité indicielle »<sup>35</sup>. La première se concentre sur des facteurs physiologiques spécifiques, tandis que la seconde permet d'intégrer les fonctions psychologiques et sociales pour identifier le déclin cognitif. Ces deux outils sont faciles à utiliser et à répéter avec des évaluations en série. Grâce à une meilleure identification de la fragilité, nous pouvons mettre en place des actions correctives, tant sur le plan physiologique que psychologique. Une meilleure sensibilisation et une meilleure reconnaissance permettent d'identifier les facteurs prédictifs.

L'obésité chez le chat est connue pour diminuer la durée de vie<sup>36</sup> ; cependant, avec le vieillissement, la perte de poids est plus fréquente.<sup>37</sup> Les SCC < 5/9 et de 9/9 sont négativement associés à la survie et à la durée de vie.<sup>38</sup> Les visites régulières d'une assistante, et l'éducation des clients pour qu'ils surveillent à la maison le poids, le SCC et le SCM peuvent améliorer la détection précoce des tendances négatives.

L'efficacité du tube digestif change avec le temps chez le chat vieillissant. Les chats âgés de 7 à 11 ans ont besoin d'un apport calorique réduit,<sup>39</sup> tandis que les chats âgés de 12 ans et plus ont des besoins énergétiques quotidiens (BEQ) plus élevés.<sup>39,40</sup> La prise alimentaire peut être affectée par des changements cognitifs, des maladies dentaires et des maladies systémiques.<sup>41</sup> La diminution de la fonction digestive chez les chats âgés peut également conduire à la consommation de plus petits volumes de nourriture à chaque repas, les chats de plus de 10 ans ayant

besoin d'une alimentation riche en calories avec des protéines hautement digestibles proposées en repas plus petits et plus fréquents.<sup>9</sup> Les besoins énergétiques au repos (BER) peuvent être déterminés par le calcul suivant :<sup>42</sup>

$$\text{BER (kcal)} = 30 \times \text{poids corporel (kg)} + 70$$

Pour déterminer les BEQ, ajoutez un facteur de 10 à 20 %, bien que certains chats âgés puissent nécessiter un facteur de 25 %.<sup>43</sup> Les quantités à donner peuvent être déterminées en fonction de la densité énergétique et des nutriments de l'aliment donné. Guidez les clients pour qu'ils notent les apports réels et signalent tout changement. Des temps de transit plus lents peuvent prédisposer les chats âgés à la déshydratation des selles et à la constipation.<sup>32</sup> Dans certains cas, l'utilisation de régimes spécifiques<sup>44</sup> ou l'ajout quotidien de polyéthylène glycol 3350 à la nourriture peuvent être bénéfiques pour favoriser une bonne consistance des selles.<sup>45</sup>

Le groupe de travail de 2020 de l'AAHA/AAFP sur la vaccination féline a recommandé des plans de vaccination individualisés basés sur cinq variables d'évaluation du risque : l'âge et le stade de vie, l'état de santé, l'exposition à l'agent, l'historique et l'immunodéficience.<sup>46</sup> Les chats âgés en bonne santé et les chats âgés dont la maladie est contrôlée sont éligibles à la vaccination selon ces critères. Bien qu'un mauvais état de santé puisse augmenter le risque d'effets secondaires, le même chat peut être plus sensible aux maladies infectieuses et bénéficier de la vaccination. Le vétérinaire devra évaluer ces variables de risque au cas par cas. Reportez-vous aux « Guides de recommandations de vaccination féline 2020 de l'AAHA/AAFP »<sup>46</sup> pour de plus amples informations.

Une prévention régulière et à large spectre contre les parasites est recommandée par le Companion Animal Parasite Council, quel que soit le mode de vie. Les risques d'exposition augmentent lorsque les chats passent du temps à l'extérieur, y compris sur des patios ou dans des enclos, ou lorsqu'ils voyagent pour être toilettés, mis en pension ou recevoir d'autres soins, et lorsque les autres animaux domes-

tiques ont un mode de vie intérieur/extérieur. Un mode de vie strictement intérieur n'élimine cependant pas les risques d'exposition. Une protection de routine contre les parasites intestinaux courants, la dirofilariose cardiopulmonaire, les puces et, dans certains cas, les tiques, est recommandée.

Les maladies dentaires et la douleur associée chez les chats passent souvent inaperçues à la maison. Les signes cliniques peuvent inclure des mouvements brusques de la tête, des coups de patte sur la bouche, une protrusion de la langue, une hypersalivation ou le frottement de la tête sur le sol<sup>47</sup>, mais les signes sont souvent subtils et ne sont pas explicitement liés à une maladie dentaire. Les chats peuvent présenter de vagues altérations de l'activité, de l'appétit et des interactions avec la famille, et/ou d'autres signes subtils de douleur (Tableau 2). Le risque de maladie parodontale augmente avec l'âge,<sup>48</sup> tout comme le risque de résorption dentaire,<sup>49,50</sup> ce qui fait qu'une évaluation dentaire complète est une composante essentielle de tout examen de chat âgé. Chez le patient vigiles, cela comprend l'examen extra-oral de la tête ainsi que l'examen intra-oral.<sup>47</sup> L'examen de l'ensemble de l'arcade dentaire peut être difficile chez les chats vigiles, et des lésions peuvent ne pas être détectées. Par exemple, la résorption dentaire est couramment constatée en premier lieu pour les dents 307 et 407<sup>49</sup>, mais l'évaluation de ces prémolaires mandibulaires peut être un défi chez le chat vigile. Des techniques de manipulation adaptées aux chats peuvent améliorer ce processus.<sup>11</sup> Une vidéo montrant des conseils adaptés aux chats pour des examens dentaires félins approfondis est disponible en annexe (voir page 632).

Une évaluation dentaire complète nécessite une anesthésie et comprend des examens extra-oraux et intra-oraux approfondis ainsi qu'une radiographie dentaire.<sup>47</sup> L'âge avancé ne doit pas être un facteur limitant la poursuite des soins dentaires sous anesthésie.<sup>51</sup>

## Problèmes concomitants à prendre en compte chez le chat vieillissant

### Anesthésie

Les procédures, y compris l'échographie diagnostique, l'endoscopie, la pose de sonde d'alimentation et la chirurgie, nécessitent une sédation ou une anesthésie. Les données historiques indiquent des taux de mortalité plus élevés chez les chats que chez les chiens, ainsi que chez les chats de plus de 12 ans (groupe de comparaison de 1 à 5 ans).<sup>52</sup> Cependant, les facteurs de risque ont été identifiés et les pratiques d'anesthésie modifiées pour atténuer les résultats négatifs. Le « Guide de recommandations pour l'anesthésie féline de l'AAFP »<sup>53</sup> souligne l'importance de la réduction du stress (par exemple, gabapentine avant la visite, manipulation adaptée au chat<sup>11</sup> et nursing<sup>54</sup>) pendant la période péri-opératoire. La tachycardie n'est pas bien tolérée, et la diminution de la réserve cardiaque rend le patient âgé moins apte à répondre aux pertes ou à la surcharge liquidienne. Les débits de perfusion

recommandés pour les chats pendant l'anesthésie sont de 3 ml/kg/h pour tenir compte du volume sanguin félin (50-60 ml/kg) et de la prévalence de la cardiomyopathie hypertrophique ; notez que ces débits sont inférieurs à ceux des chiens.<sup>53</sup> Le type et le volume de fluides utilisés dépendent de nombreux facteurs, notamment des antécédents du patient, de sa condition physique, de la durée et du type de procédure.<sup>55</sup>

Chez l'humain, avec le vieillissement, la capacité fonctionnelle des principaux organes diminue ; la diminution de la taille et du débit sanguin du foie et des reins entraîne un retard dans le métabolisme et l'excrétion des médicaments.<sup>56</sup> La diminution de la matière grise réduit les besoins en anesthésie. La perte de masse musculaire et la baisse des capacités de thermorégulation rendent les humains âgés sensibles à l'hypothermie, ce qui diminue encore le métabolisme des médicaments et prolonge la récupération anesthésique.<sup>57</sup> Ces changements affectant le métabolisme des médicaments sont susceptibles de se produire chez les chats. Si des ajustements ne sont pas effectués en fonction de ces changements physiologiques liés à l'âge, le risque de surdosage anesthésique augmente considérablement.

Si les ajustements ne sont pas faits en fonction des changements physiologiques liés à l'âge, le risque de surdose d'anesthésie augmente considérablement.

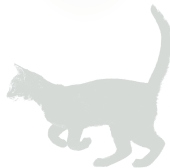

### Hypertension

L'hypertension est bien reconnue chez le chat mais, en raison de la rareté du dépistage, elle est probablement sous-diagnostiquée.<sup>17</sup> L'hypertension féline peut être primaire/idiopathique, secondaire à une autre maladie ou à un stress situationnel.<sup>16</sup>

L'hypertension primaire/idiopathique est rare chez les chats et la détection d'une hypertension doit donc inciter à rechercher une maladie latente. Une hypertension secondaire peut se développer en association avec la MRC, l'hyperthyroïdie, l'hyperaldostéronisme primaire, le diabète sucré, les phéochromocytomes et l'hyperadrénocorticisme hypophysaire. Le lecteur est invité à consulter le kit pédagogique de l'AAFP sur l'hypertension<sup>18</sup> et les « Directives de consensus de l'ISFM sur le diagnostic et la prise en charge de l'hypertension chez les chats »<sup>17</sup> pour plus de détails.

### Maladie rénale chronique

Les maladies rénales sont fréquentes chez les chats âgés, et commencent souvent chez les chats adultes matures. Le diagnostic et la prise en charge sont bien documentés.<sup>58,59</sup> Cependant, quelques spécificités méritent d'être mentionnées :

- ✦ Les signes cliniques de la MRC peuvent être négligés par les propriétaires de chats, et peuvent se manifester par de la polyurie, la polydipsie, l'inappétence, les nausées, la constipation, un pelage terne, une perte de poids et une fonte musculaire.
- ✦ Les examens de laboratoire de routine (dépistage et évaluation des tendances) peuvent révéler une maladie précoce. Certains patients dont les concentrations de créatinine sérique se situent dans les intervalles de référence publiés peuvent en fait être atteints de MRC. L'évaluation des

données combinées, y compris la créatinine, la densité urinaire, la SDMA, le poids corporel, le SCM et l'état d'hydratation, est importante pour diagnostiquer la maladie. Une créatinine sérique persistante  $> 1,6$  mg/dl ( $> 140$   $\mu$ mol/l), une densité urinaire  $< 1,035$  et une SDMA  $> 14$   $\mu$ g/dl indiquent un dysfonctionnement rénal.

- ❖ L'interprétation des résultats d'analyses d'urine, en particulier la densité urinaire et les protéines, est particulièrement importante chez les chats âgés. La cystocentèse permet une plus grande précision. Si la densité urinaire est  $< 1,035$ , la mesure doit être répétée lors d'une analyse ultérieure pour confirmer la persistance. Déterminez le rapport protéines/créatinine urinaire (RPCU) pour quantifier la protéinurie lorsque cela est approprié (c'est-à-dire en l'absence d'hématurie macroscopique ou d'inflammation).

- ❖ Lorsque le diagnostic de MRC est confirmé et que le patient est stable et hydraté, on procède à la stadification IRIS (International Renal Interest Society). La stadification est basée sur l'évaluation répétée de la créatinine sérique (avec prise en compte de la SDMA) et la sous-stadification basée sur la PA et le RPCU. La stadification du patient aide à la prise en charge de la maladie, et la sous-stadification aide à déterminer quand une intervention contre l'hypertension et la protéinurie est indiquée.

- ❖ Évaluez la nutrition, y compris l'historique complet du régime alimentaire et l'évaluation de l'apport calorique adéquat. Déterminez le poids corporel, le SCC et le SCM. Posez des questions ouvertes sur la façon dont le chat s'alimente. Traitez le manque d'appétit et optimisez l'apport calorique avec un traitement anti-nauséeux et un stimulant de l'appétit.<sup>60</sup>

- ❖ Il a été démontré qu'une alimentation « rénale » restreinte en phosphore améliorerait les troubles osseux et minéraux de la MRC, réduisait les épisodes urémiques et augmentait la durée de survie.<sup>61</sup> Les aliments humides ont l'avantage d'améliorer l'hydratation. Si un chat ne mange pas les aliments « rénal » industriels, une ration ménagère peut être formulée avec l'aide d'un nutritionniste. Il est également possible de placer une sonde d'alimentation pour optimiser la nutrition et l'hydratation, et faciliter l'administration des médicaments.<sup>61</sup>

- ❖ Traitez la déshydratation pour favoriser le débit sanguin rénal et prévenir la constipation.

- ❖ Comme la MRC est la principale cause d'hypertension secondaire, la pression artérielle doit être surveillée et l'hypertension doit être traitée médicalement lorsqu'elle est identifiée, avec pour objectif de ramener la tension artérielle dans l'intervalle de référence.

- ❖ Recherchez et traitez les anomalies des électrolytes, comme l'hypokaliémie et l'hyperphosphatémie.

- ❖ Évaluez la protéinurie rénale, qui peut jouer un rôle dans la progression de la maladie et qui s'est avérée être un prédicteur négatif de la survie.<sup>62-64</sup>

Une protéinurie élevée et persistante (RPCU  $> 0,4$ ) déterminée comme étant d'origine rénale mérite une intervention thérapeutique.

- ❖ Surveillez l'anémie, qui est fréquente lors d'une MRC et constitue un facteur prédictif négatif de survie.<sup>63,64</sup> Une anémie modérée à grave justifie un traitement.

- ❖ Effectuez une analyse et une culture urinaire (lorsque cela est indiqué sur la base des signes cliniques, du sédiment urinaire ou d'une densité urinaire basse) pour surveiller les infections urinaires, qui sont plus fréquentes chez les chats atteints de MRC.<sup>65</sup> Une densité urinaire basse est considérée comme un facteur potentiel augmentant le risque d'infection urinaire subclinique, même si le sédiment urinaire est inactif.<sup>66</sup>

- ❖ Lorsque vous prescrivez des traitements aux patients atteints de MRC (par exemple, mirtazapine orale, gabapentine, fluoroquinolones), gardez à l'esprit que le dysfonctionnement rénal peut nécessiter une réduction de la dose ou une modification de l'intervalle d'administration.<sup>67,68</sup>

- ❖ Lorsque le patient est stabilisé, continuez la surveillance tous les 3 à 6 mois ou plus souvent si cela est indiqué en fonction des facteurs individuels du patient.

- ❖ Trouvez un équilibre entre la qualité de vie et les interventions thérapeutiques afin d'élaborer un plan qui convient aux clients et aux patients.

**Tableau 3** Mythes et réalité concernant le traitement et la prise en charge de l'hyperthyroïdie féline

| MYTHE                                                                                                                                                                              | RÉALITÉ                                                                                                                                                                                                                                                              |
|------------------------------------------------------------------------------------------------------------------------------------------------------------------------------------|----------------------------------------------------------------------------------------------------------------------------------------------------------------------------------------------------------------------------------------------------------------------|
| Le traitement de l'hyperthyroïdie féline provoque des maladies rénales.                                                                                                            | L'excès de T4 augmente le débit de filtration glomérulaire (DFG). Un traitement efficace de l'hyperthyroïdie féline diminue le DFG, révélant ainsi une insuffisance rénale chronique préexistante.                                                                   |
| Les chats dont le taux de créatinine se situe dans les intervalles de référence ne présentent pas de MRC.                                                                          | L'augmentation du DFG et la perte musculaire associées à l'HT entraînent une diminution de la créatinine même si le chat est atteint de MRC.                                                                                                                         |
| Le maintien d'un taux de T4 légèrement supérieur aux intervalles de référence aidera les patients atteints de MRC.                                                                 | Même de légères élévations de la T4 peuvent provoquer ou exacerber des lésions glomérulaires.                                                                                                                                                                        |
| Un taux de T4 inférieur à l'intervalle de référence après traitement ne nuit pas aux chats. Le patient n'est pas hypothyroïdien tant que la T4 est dans l'intervalle de référence. | L'hypothyroïdie iatrogène peut entraîner une progression de la MRC et réduire la durée de vie. Les chats peuvent développer une hypothyroïdie cliniquement significative même si la T4 est dans l'intervalle de référence.                                           |
| L'isolement après un traitement à l'iode radioactif ( $I^{131}$ ) est trop stressant pour un chat.                                                                                 | Bien qu'une semaine loin de la maison implique un certain stress, c'est bien mieux que le stress associé à la maladie elle-même, avec une médication constante et des tests sanguins fréquents.                                                                      |
| Le coût de l' $I^{131}$ est prohibitif.                                                                                                                                            | Le coût de toutes les options de traitement pendant un an est essentiellement le même. Sur toute la durée de vie du chat, le coût de l' $I^{131}$ est nettement inférieur au coût des complications de la maladie, des médicaments à vie ou des régimes diététiques. |

## Encadré 3

La constipation est un problème répandu chez les chats plus âgés.

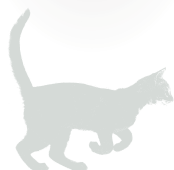

## Éventuels facteurs contribuant à la constipation féline

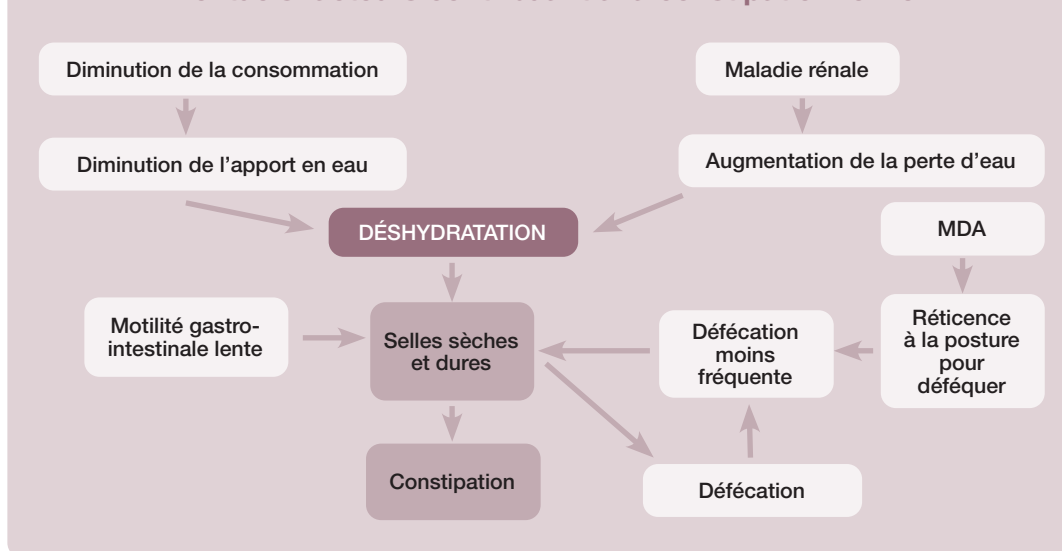

## Hyperthyroïdie

L'HT touche 10 % des chats de plus de 10 ans.<sup>69</sup> Elle peut être traitée, voire guérie, si elle est détectée tôt. L'hyperthyroïdie est diagnostiquée par une combinaison de signes cliniques (par exemple, perte de poids, polyphagie, polyurie, polydipsie, augmentation des vocalisations, agitation, augmentation de l'activité, vomissements, diarrhée, poil piqué, apathie, inappétence et léthargie)<sup>70</sup> et une concentration élevée d'hormones thyroïdiennes (T4) dans le sérum. L'identification des tendances de la T4 est précieuse pour établir un diagnostic précoce de l'HT. Les principales croyances concernant le traitement et la prise en charge de l'HT sont réfutées dans le Tableau 3. Pour des informations détaillées sur les options de traitement, se référer aux « Guide de recommandations de 2016 de l'AAFP pour la prise en charge de l'hyperthyroïdie féline ».<sup>70</sup>

## Diabète sucré

Le DS est une endocrinopathie fréquente chez les chats âgés. La plupart des cas sont similaires au diabète de type II chez l'homme, surtout chez les chats de plus de 10 ans, où la destruction des cellules bêta du pancréas et la résistance périphérique à l'insuline sont la pathologie latente.<sup>71,72</sup> L'utilisation de corticostéroïdes peut prédisposer les individus sensibles.

Une prise en charge nutritionnelle à l'aide d'aliments humides, pauvres en glucides et riches en protéines, peut aider ces patients s'ils sont réceptifs.<sup>73</sup> La plupart des chats diabétiques sont insulino-dépendants au moment du diagnostic. Plus la glycémie du chat se normalise rapidement, plus la probabilité de rémission clinique est grande.<sup>74</sup> Les autres facteurs associés à une probabilité accrue de rémission sont une hyperglycémie modérée au moment du diagnostic, l'absence d'hypercholestérolémie, une glycémie moyenne sur 12 heures plus

faible au 17<sup>ème</sup> jour de traitement et un facteur de croissance analogue à l'insuline plus élevé 1 à 3 semaines après le diagnostic.<sup>75</sup> Les insulines à longue durée d'action peuvent faciliter l'atteinte de cet objectif.<sup>74</sup> La présence de maladies concomitantes, comme la pancréatite, affecte la rémission clinique et le contrôle glycémique. L'insuffisance pancréatique exocrine peut apparaître comme une comorbidité chez les chats diabétiques.<sup>76</sup>

Le suivi du chat diabétique avec des courbes de glycémie à la clinique peut être difficile chez certains patients.<sup>77-79</sup> La fructosamine évalue le contrôle glycémique sérique sur des intervalles de temps plus longs et peut différencier le DS de l'hyperglycémie de stress. Les glucomètres en continu sont disponibles depuis peu et, avec la surveillance à l'avenir de l'HbA1c (hémoglobine glyquée féline ou glycosylée), ils pourraient faciliter la gestion à domicile.

Pour plus d'informations, voir le « Guide des recommandations de consensus de l'ISFM sur la prise en charge pratique du diabète sucré chez les chats »<sup>80</sup> et le kit pédagogique de l'AAFP sur le diabète.<sup>81</sup>

## Maladie dentaire

Les maladies dentaires sont des affections courantes mais sous-diagnostiquées chez les félins.<sup>51</sup> Jusqu'à 70 % des chats présentent une forme de maladie dentaire avant l'âge de 2 ans.<sup>51</sup> Chez les patients âgés de plus de 7 ans, les formes courantes de maladies dentaires comprennent les maladies parodontales, la résorption dentaire, les tumeurs buccales et les maladies systémiques avec des manifestations buccales (par exemple, MRC, DS).<sup>47</sup> L'âge présente une corrélation significative avec l'incidence des maladies parodontales<sup>48</sup> et de la résorption dentaire.<sup>49,50</sup>

Le groupe de travail considère les points suivants comme des priorités en ce qui concerne les maladies dentaires et le chat âgé :

- ❖ Ne considérez jamais l'âge avancé seul comme un obstacle pour offrir des soins dentaires optimaux.
- ❖ La radiographie dentaire est une composante essentielle des soins dentaires chez le chat,<sup>51,82</sup> y compris :
  - Radiographie dentaire de la bouche complète précédant la mise en place d'un plan de traitement.
  - Des radiographies dentaires post-chirurgicales pour assurer une extraction chirurgicale correcte et documenter le site d'extraction (c'est-à-dire, s'assurer de l'extraction complète de la racine, documenter le degré d'amputation de la couronne, identifier l'état de l'os alvéolaire consécutif aux techniques d'extraction).<sup>51</sup>
- ❖ Utilisez une analgésie appropriée avant, pendant et après l'intervention.
- ❖ Utilisez des échelles de douleur pour évaluer le succès de l'analgésie (par exemple, l'échelle Feline Grimace Scale<sup>83</sup>).

### Maladie gastro-intestinale

Des changements se produisent dans tous les systèmes de l'organisme avec le vieillissement, et certains des changements les plus profonds se produisent dans le tractus digestif. Des modifications de la motilité du pharynx, de l'œsophage et du tube digestif, ainsi que des altérations du pH gastrique entraînent une modification du microbiote gastro-intestinal, ce qui se traduit par une diminution de la digestibilité et une perte de poids progressive<sup>84</sup>. La constipation est également un problème gastro-intestinal courant chez les chats âgés.<sup>84,85</sup> Son étiologie est probablement multifactorielle. L'hypokaliémie peut contribuer à ralentir la motilité gastro-intestinale<sup>85</sup> et la constipation peut être un indicateur d'hypercalcémie.<sup>86</sup> La douleur liée à la défécation et à l'émission de selles dures et sèches aggrave le problème (Encadré 3). Des scores fécaux peuvent être utilisés pour évaluer les selles.

Les maladies inflammatoires chroniques de l'intestin (MICI), la néoplasie, la pancréatite ± triade, l'insuffisance pancréatique et le parasitisme sont des causes courantes de perte de poids en l'absence d'autres signes cliniques. Pour obtenir un diagnostic définitif, il est nécessaire d'aller au-delà des analyses de laboratoire de base. Les diagnostics supplémentaires comprennent l'échographie abdominale et le dosage sérique de l'immunoréactivité de la lipase pancréatique féline (fPLI), de l'immunoréactivité de type trypsine (TLI), de la cobalamine et des folates. Un diagnostic de pancréatite ne peut pas être posé par l'échographie abdominale ou les tests sanguins seuls ; mais, lorsqu'ils sont effectués ensemble, ils peuvent augmenter la probabilité d'un diagnostic correct.<sup>87</sup> De même, un examen fécal négatif pour les parasites ne doit pas être surinterprété - il signifie seulement qu'aucun parasite n'était présent dans l'échantillon soumis.

### Cancer

En vieillissant, le risque de cancer augmente chez les chats.<sup>88</sup> Les signes sont souvent non spécifiques,

## Encadré 4

### Affections courantes associées à la douleur à long terme

- ❖ Maladie Dégénérative Articulaire (MDA)
- ❖ Maladie dentaire
- ❖ Neurologique - maladie lombo-sacrée, maladie discale, douleur cervicale
- ❖ Douleurs myofasciales et des tissus mous
- ❖ Dermatologique - dermatite, otite, plaies récalcitrantes
- ❖ Oculaire - ulcères cornéens, uvéite, glaucome
- ❖ Viscérale - MICI, pancréatite, mégacolon, constipation, cystite idiopathique
- ❖ Cancer - tumeur primaire ou liée au traitement (par exemple, brûlures par radiation)
- ❖ Douleur postopératoire persistante - onychectomie, mastectomie, amputation d'un membre

Il existe de multiples causes de la douleur persistante chez les chats âgés, et l'expérience de la douleur peut s'intensifier lorsque plus d'une condition est présente.

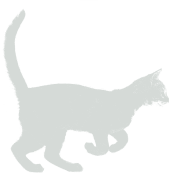

comme la perte d'appétit, la perte de poids ou la léthargie. L'utilisation de techniques adaptées aux chats, avec une palpation douce et fluide, peut contribuer à la qualité des informations recueillies par le vétérinaire. Soyez attentif à la cachexie et à l'alopécie paranéoplasique.

Jusqu'à 50 % des masses cutanées félines sont histologiquement malignes<sup>89</sup> (généralement des tumeurs mastocytaires, des carcinomes spinocellulaires, des mélanomes, des fibrosarcomes) et un diagnostic doit être effectué dès la détection, car tout retard dans le diagnostic peut entraîner un pronostic plus défavorable en raison de la croissance et/ou des métastases. Le fait d'encourager les propriétaires à examiner tous leurs chats tous les mois, pour rechercher des masses cutanées, en notant leur emplacement et leur taille, peut permettre une détection plus précoce.

De nombreux cancers peuvent être traités ou améliorés, surtout s'ils sont détectés tôt. Le fait de travailler avec un oncologue permet de disposer d'options thérapeutiques actualisées.

Le fait de discuter des objectifs du traitement avec les propriétaires permettra d'orienter les recomman-

## Encadré 5

### Checklist du propriétaire pour détecter la douleur associée aux MDA chez les chats

Pour déterminer si votre chat présente des signes de douleur associée à une arthrose, veuillez remplir le questionnaire suivant. Veuillez répondre à toutes les questions.

|                                                                              |                              |                              |
|------------------------------------------------------------------------------|------------------------------|------------------------------|
| ❖ Votre chat grimpe-t-il normalement ?                                       | <input type="checkbox"/> Oui | <input type="checkbox"/> Non |
| ❖ Votre chat descend-t-il normalement ?                                      | <input type="checkbox"/> Oui | <input type="checkbox"/> Non |
| ❖ Votre chat monte-t-il les escaliers ou les marches normalement ?           | <input type="checkbox"/> Oui | <input type="checkbox"/> Non |
| ❖ Votre chat descend-t-il les escaliers ou les marches ?                     | <input type="checkbox"/> Oui | <input type="checkbox"/> Non |
| ❖ Votre chat court-il normalement ?                                          | <input type="checkbox"/> Oui | <input type="checkbox"/> Non |
| ❖ Votre chat poursuit-il des objets en mouvement (par exemple, des jouets) ? | <input type="checkbox"/> Oui | <input type="checkbox"/> Non |

D'après Enomoto et al.<sup>97</sup> Basé sur la Musculoskeletal Pain Screening Checklist (MiPSC)  
© 2019 Université d'État de Caroline du Nord.

ditions. Les chimiothérapies, les radiothérapies et les thérapies photodynamiques, ainsi que les techniques chirurgicales, ont fait de grands progrès et ont permis d'obtenir des rémissions de longue durée et d'accroître la satisfaction des propriétaires. De nombreux cancers peuvent être traités de manière palliative en utilisant des interventions moins agressives, en ralentissant la croissance et en gérant la douleur et les nausées pour maintenir le bien-être. L'éducation du client comprend une discussion sur la qualité de vie et les traitements disponibles. La voie ou la modalité de traitement peut être modifiée dans certains cas pour mieux convenir au patient et/ou au propriétaire. La fourniture d'informations sur l'éventail des réponses au traitement, l'évaluation de l'acceptation du traitement par le chat et l'estimation des coûts aideront les propriétaires à prendre les décisions de traitement les plus appropriées pour leur chat et eux-mêmes.

#### Sources permanentes de douleur

De nombreuses affections abordées dans ces recommandations comportent une composante de douleur. La douleur doit être examinée et prise en charge comme une maladie à part entière et traitée en même temps que le ou les problèmes primaires. L'évaluation de la douleur chronique chez les chats est un défi, mais notre capacité à la faire s'améliorer rapidement.<sup>90</sup> Il existe de multiples causes de douleur persistante chez les chats âgés (Encadré 4), et l'expérience de la douleur peut s'intensifier lorsque plusieurs affections sont présentes, en raison de la sensibilisation du système de détection de la douleur. Il est important de discuter de la MDA, des tissus mous, de la douleur inflammatoire et neurologique car ils sont une cause fréquente d'inconfort permanent chez les chats âgés.

La MDA est une maladie dégénérative chronique affectant le squelette appendiculaire et axial.<sup>91</sup> Sa prévalence est fortement liée à l'âge, affectant jusqu'à 74 % des chats âgés de ≥ 12 ans.<sup>91,92</sup> La maladie présente de multiples facettes ; les changements périphériques et centraux entraînent une douleur inadaptée. Celle-ci n'a aucune utilité (c'est-à-dire qu'elle n'est pas protectrice) et peut être divisée en douleur neuropathique (dommages directs aux tissus neurologiques) et douleur fonctionnelle (dysfonctionnement du système nocicepteur).<sup>93</sup>

De nombreux chats atteints de MDA ne sont pas diagnostiqués et ne sont pas traités. Le diagnostic dépend de questionnaires pour le client,<sup>94-96</sup> de l'historique, d'un examen orthopédique, neurologique et myofascial, de radiographies et, dans certains cas, de la réponse à un essai de traitement. Des outils de dépistage cliniquement rapides augmenteront la probabilité d'identifier les chats atteints ; l'un de ces outils comprend six questions (Encadré 5).<sup>97</sup> La réponse à la question « comment votre chat saute-t-il par rapport à l'année dernière ? » peut alerter un clinicien sur la nécessité ou non de poursuivre un bilan de MDA. Une ressource complète pour les vétérinaires et les propriétaires de chats est le Feline Musculoskeletal Pain Index (FMPI ; [painfreecats.org](http://painfreecats.org)).

**L'étiologie complexe de la douleur liée à la maladie dégénérative des articulations exige une approche multimodale et intégrative impliquant des thérapies pharmacologiques et non pharmacologiques, et la modification de l'environnement.**

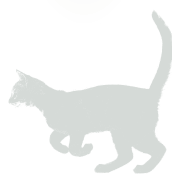

La maladie dégénérative articulaire est actuellement incurable et nécessite un traitement à vie pour maintenir le confort, la mobilité et la qualité de vie. Cela s'accompagne de défis liés à la réticence des propriétaires et à la mauvaise application du traitement, aux effets indésirables des médicaments à long terme, aux interactions médicamenteuses et à l'impact des comorbidités. L'étiologie complexe de la douleur liée à la MDA exige une approche multimodale et intégrative impliquant des thérapies pharmacologiques et non pharmacologiques, ainsi que la modification de l'environnement.

Pour traiter les chats souffrant d'une atteinte dégénérative des articulations (MDA), les vétérinaires prescrivent divers médicaments et compléments alimentaires, en dépit du peu de données disponibles sur leur efficacité.<sup>93</sup> Les médicaments dont l'efficacité a été publiée comprennent les anti-inflammatoires non stéroïdiens (AINS),<sup>98</sup> la gabapentine<sup>99</sup> et le tramadol ;<sup>100,101</sup> cependant, la plupart des études avaient l'objectif d'examiner la monothérapie. Environ 68 % des chats atteints de MDA souffrent de MRC,<sup>102</sup> ce qui rend l'utilisation

#### Encadré 6 //

##### Composantes du DISHA-AL

- ❖ Désorientation
- ❖ Changements d'interaction
- ❖ Modifications du cycle veille-sommeil
- ❖ Malpropreté
- ❖ Modifications de l'activité
- ❖ Anxiété
- ❖ Apprentissage/mémoire

Avec l'aimable autorisation de GM Landsberg

#### Encadré 7 //

##### Dix questions ciblées pour l'investigation d'un éventuel SDC

- ❖ Quelle est la surface la plus élevée sur laquelle votre chat peut sauter ? Votre chat semble-t-il boiter ?
- ❖ À quand remonte la dernière fois où vous avez vu votre chat s'étirer et bâiller longuement ?
- ❖ Votre chat a-t-il uriné ou déféqué en dehors de son bac à litière depuis le dernier examen ?
- ❖ Comment les interactions de votre chat avec ses compagnons de maison ont-elles changé ?
- ❖ Votre chat est-il plus distant ou plus collant/affectueux avec vous qu'auparavant ?
- ❖ Est-ce que votre chat "parle" (vocalise), miaule avec insistance ou hurle sans raison apparente ?
- ❖ Comment les habitudes de votre chat en matière de toilettage et de sommeil ont-elles changé ?
- ❖ Comment les habitudes de votre chat en matière d'alimentation et de boisson ont-elles changé ?
- ❖ Votre chat est-il prêt à jouer avec des jouets ou à chasser s'il en a l'occasion ?
- ❖ Votre chat est-il souvent confus, distrait ou déprimé ?

des AINS controversée dans cette population. Des études rétrospectives n'ont montré aucun effet indésirable sur la fonction rénale (suivi des valeurs de la créatinine sérique et densité urinaire) ou la longévité chez les chats atteints de MRC stable (stades IRIS 1-3) recevant du meloxicam à une dose quotidienne moyenne de 0,02 mg/kg.<sup>103,104</sup> Aucun effet indésirable n'a été rapporté chez des chats atteints de MRC (stades IRIS 1-2) recevant du robénacoxib à raison de 1,0-2,4 mg/kg q24h pendant 28 jours dans une étude prospective.<sup>105</sup> Cependant, une étude prospective récente (meloxicam 0,02 mg/kg q24h pendant 6 mois ou placebo) chez des chats atteints de MRC a rapporté un rapport protéine/créatinine urinaires (RPCU) plus élevé à 6 mois chez les chats traités par meloxicam.<sup>106</sup>

Les nouveaux traitements (par exemple, les anticorps monoclonaux spécifiques félins contre le facteur de croissance du tissu nerveux) traitent la composante neuropathique de la maladie et surmontent les problèmes d'un traitement quotidien, car ils sont administrés par voie sous-cutanée une fois toutes les 4 à 6 semaines.<sup>107</sup>

La douleur des tissus mous se manifeste par une restriction de la mobilité des tissus liée à de multiples états pathologiques (par exemple, la MDA, les états douloureux oraux et viscéraux, et les lésions directes des structures des tissus mous). La palpation myofasciale évalue la viscosité et la mobilité des tissus, et provoquera une réponse du chat (par exemple, tentative de vocaliser, se détourner, fuir) en cas de douleur. Les tissus mous perdent en élasticité lors de mouvement réduit ou d'inflammation. L'exercice, le massage, l'acupuncture, la thérapie par ondes de choc et la vibration sont autant de traitements de choix de la perte d'élasticité des tissus mous douloureux.

La douleur neuropathique est fréquente chez les chats vieillissants, en particulier au niveau des segments lombosacrés et pelviens de la moëlle épinière. Ce type de douleur est souvent inadapté et difficile à traiter. Les affections neurologiques peuvent rester localisées ou s'accompagner de douleur et de dysfonctionnement des structures viscérales somatiquement liées (par exemple, dysfonctionnement colique et mégacolon avec maladie lombosacrée).<sup>108,109</sup>

La douleur inflammatoire est une caractéristique de nombreuses maladies félines. Les chats vieillissants semblent subir des changements amplifiés de leur système immunitaire susceptibles de les prédisposer à des comorbidités.

### Syndrome de dysfonctionnement cognitif

Les chats vieillissants présentent souvent des vocalisations excessives, une altération des interactions sociales ou des séquences comportementales, ainsi que de la malpropreté dans la maison.<sup>110-112</sup> Chez plus de 25 % des chats âgés de 11 ans ou plus, ces changements n'ont pas de cause médicale reconnue.<sup>111,113</sup> Les motivations félines pouvant être occultes, les différences entre les races de chats et au sein de chaque race abondent ; de plus, les changements apparaissent

**La fréquence élevée des comorbidités à mesure que les chats vieillissent est probablement liée à une combinaison de stress exogène provoquant des lésions oxydatives, d'exposition aux agents infectieux au fil du temps et de déséquilibre du système immunitaire.**

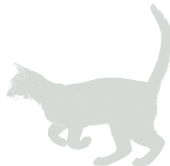

progressivement et imitent les réponses adaptatives à la douleur chronique.<sup>114</sup> Les propriétaires et les vétérinaires peuvent donc attribuer le syndrome de dysfonctionnement cognitif (SDC) au fait d'être « simplement un vieux chat ». Si les vétérinaires insistent vivement pour que les propriétaires enregistrent régulièrement les photos et les vidéos des habitudes quotidiennes de leur chat, il est possible de déceler les changements de chaque chat plus tôt.

L'acronyme DISHA-AL (Encadré 6) a été utilisé pour décrire les signes cliniques du déclin cognitif. Des questions ciblées (Encadré 7) visant à identifier les éléments du DISHA-AL et le bilan clinique qui s'ensuit permettent de distinguer le déclin médical du déclin cognitif. En définitive, le SDC est un diagnostic d'exclusion des causes médicales et environnementales des comportements.<sup>9,112</sup>

Si la prise en charge qui intègre l'éducation, l'optimisation de l'environnement du client<sup>8,9,115</sup> (voir plus loin dans le Tableau 5), les suppléments d'acides gras essentiels, d'antioxydants et de vitamines B,<sup>116-118</sup> et les phéromones<sup>119</sup> n'apporte pas d'amélioration, la sélégiline (0,25-1 mg/kg q24h) peut être bénéfique.<sup>120,121</sup> La thérapie combinée individualisée est la plus efficace et peut améliorer les fonctions cérébrales, la longévité et la tranquillité d'esprit du propriétaire.<sup>9</sup>

### Prise en charge des maladies complexes

Les comorbidités sont courantes en gériologie, et les chats ressemblent beaucoup aux humains à cet égard.<sup>122</sup> Les raisons expliquant la fréquence élevée

## Encadré 8

### Maladies félines concomitantes communément reconnues

- ❖ MRC + hyperthyroïdie
- ❖ MRC + MDA<sup>102</sup>
- ❖ MRC + insuffisance cardiaque<sup>126</sup>
- ❖ MRC + maladie parodontale<sup>127,128</sup>
- ❖ Hyperthyroïdie+ DS<sup>129</sup>
- ❖ DS + obésité<sup>130\*</sup>
- ❖ DS + MRC<sup>131</sup>
- ❖ DS + hyperadrénocorticisme<sup>132\*</sup>
- ❖ DS + troubles du bas appareil urinaire<sup>133</sup>
- ❖ DS + ITU + hyperthyroïdie + IRC<sup>95</sup>
- ❖ Obésité + MDA/DS/maladie cardiaque/maladie respiratoire<sup>36,134</sup>
- ❖ Triade<sup>135,136\*</sup>
- ❖ Hypertension + hyperthyroïdie
- ❖ Hypertension + MRC
- ❖ Hypertension + hyperaldostérionisme
- ❖ MRC + état corporel maigre/maladie parodontale/cystite<sup>137</sup>
- ❖ Sous-poids + MDA/DS/MRC/hyperthyroïdie/néoplasie<sup>138,139</sup>

D'après Scherk<sup>123</sup>

\*Ces analyses figurent dans un numéro spécial numérique du JFMS sur les comorbidités félines, qui traite des complexités du diagnostic et de la prise en charge, disponible sur [cpsj.fjms.com](http://cpsj.fjms.com)

**La coexistence de plusieurs maladies peut s'avérer pesante pour les clients, et une composante importante des soins prodigués par les vétérinaires consiste à soutenir le propriétaire.**

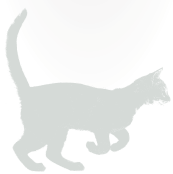

## Encadré 9

### Conseils pour aider les propriétaires de chats atteints de plusieurs maladies

- ❖ Concentrez-vous d'abord sur la maladie ayant le plus grand impact sur la qualité de vie. Les classements sont dynamiques et la maladie qui menace le plus la qualité de vie peut varier avec le temps.
- ❖ Soyez attentif à la charge du traitement, au coût et à l'observance. Formez les clients à l'administration des médicaments (comment, à quel moment ?), en leur demandant quelles sont leurs capacités et leurs limites.
- ❖ Les traitements multiples peuvent être difficiles pour le patient et le client ; il est important que la qualité du lien humain-animal soit maintenue. Montrez aux clients comment administrer les médicaments de manière calme et confortable pour le chat.
- ❖ Envisagez l'opportunité d'utiliser des pâtes, des friandises à base de l'aliment préféré ou des friandises spécialement conçues pour dissimuler des pilules ou, sinon, recomposez les médicaments oraux en friandises, liquides ou pâtes. N'ajoutez jamais de médicaments dans un aliment thérapeutique, car le chat pourrait le rejeter.
- ❖ Cherchez à savoir s'il est possible d'administrer le médicament une fois plutôt que deux ou plusieurs fois par jour en modifiant la dose ou la formulation du produit. Certains propriétaires trouvent les injections sous-cutanées plus faciles à administrer que les médicaments par voie orale.
- ❖ Très peu de médicaments félins sont efficaces lorsqu'ils sont administrés par voie transdermique. De nombreuses pharmacies proposent une multitude de médicaments à cette fin, mais il existe peu ou pas de preuves de leur efficacité. Deux médicaments couramment utilisés chez les chats âgés, à savoir la mirtazapine et le méthimazole, sont mesurables et fiables lorsqu'ils sont administrés par voie transdermique.<sup>146,147</sup>

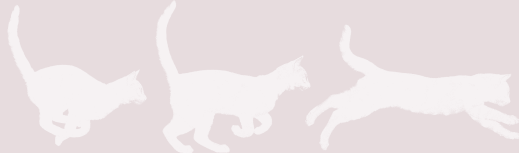

de comorbidités lorsque les chats vieillissent demeurent spéculatives, mais elles sont probablement liées à une combinaison de stress exogène provoquant des lésions oxydatives, d'exposition à des agents infectieux au fil du temps, et de déséquilibre du système immunitaire.<sup>123,124</sup> Lorsque l'homéostasie du système immunitaire faiblit, l'immunosénescence (sensibilité réduite aux agents pathogènes externes) et l'hypervigilance des tissus autologues peuvent se produire ensemble et sont parfois considérées comme des changements liés à l'inflammation et au vieillissement<sup>125</sup>.

Bien que la discussion spécifique sur l'inflammation et le vieillissement soit strictement limitée à la littérature sur la gériologie humaine, le Groupe de travail estime que le concept de fragilité permet de cerner une composante des affections complexes qui peuvent coexister chez le chat. Le concept de « modèle de prévention de la fragilité » délimite trois niveaux d'intervention : 1) primaire – c'est-à-dire réduire au minimum les facteurs de risque et l'apparition de la maladie ; 2) secondaire – retarder la progression de la maladie ; et 3) tertiaire – réduire ou limiter les déficiences, les handicaps et les complications résultant de la maladie. Lorsque les chats deviennent âgés, les deux premiers niveaux ne sont plus possibles. L'accent est désormais mis sur la troisième catégorie, à savoir la réduction et la limitation des déficiences.

Le vieillissement sain a été un objectif poursuivi depuis l'époque où les chats atteignaient rarement la vieillesse. À présent que des progrès substantiels ont été réalisés pour accroître la longévité, il est important de mettre l'accent sur la qualité de cette longévité. Bien que vieillir en bonne santé ait des significations différentes selon les personnes, tant pour elles-mêmes que pour leurs chats, et que la

perspective d'un vieillissement en bonne santé varie souvent avec le temps et les circonstances, le confort et la joie de vivre sont probablement des éléments communs à tous. Il est également important de reconnaître que les attentes d'un propriétaire à l'égard de son chat sont le reflet de sa propre attitude vis-à-vis d'un vieillissement sain.

Au fur et à mesure que les chats vieillissent, le risque de développer plus d'une maladie augmente, ce qui complique souvent le diagnostic et le traitement. Le diagnostic est facilité par la combinaison d'un examen physique approfondi, de tests diagnostiques de dépistage et de l'attention portée aux comorbidités courantes énumérées dans l'Encadré 8.

L'augmentation du nombre de maladies concomitantes s'accompagne d'une diminution de la qualité de vie liée à la santé (QVLS).<sup>140</sup> Voici quelques-uns des problèmes qui se posent chez les chats âgés atteints de plusieurs maladies :

- ❖ L'effet de la polymédicalisation et le risque d'interactions médicamenteuses. La réduction de la clairance rénale ou hépatique peut nécessiter une réduction de la posologie ou une augmentation des intervalles entre la prise des médicaments.<sup>141</sup>
- ❖ L'aversion du propriétaire et la mauvaise observance thérapeutique, en particulier lorsque la charge médicamenteuse est élevée, ce qui risque d'avoir un impact négatif sur le lien chat-propriétaire.
- ❖ L'effet du régime alimentaire sur l'état corporel, l'homéostasie inflammatoire, la fonction digestive, la fonction rénale et la santé générale.
- ❖ L'effet cumulé de plusieurs maladies. Par exemple, la MRC, l'arthrose, le DS, les MICI, le SDC et les problèmes de comportement, lorsqu'ils sont présents ensemble, peuvent aggraver une élimination inappropriée.

❖ Hypertension. Elle peut être associée à diverses maladies (thyroïdienne, cardiaque, rénale) et est beaucoup plus fréquente qu'on ne le pensait.

❖ Le risque de diagnostiquer une maladie en omettant la présence d'une autre, ou de supposer qu'une seule maladie est grave alors que les symptômes sont en réalité dus à plusieurs maladies. Par exemple :

– Lorsque la cholangite, la pancréatite et/ou les MICI surviennent en même temps, il est possible d'omettre une ou plusieurs maladies.<sup>142</sup>

– Une pancréatite chronique peut passer inaperçue chez un patient diabétique.<sup>76,143</sup>

– L'hyperthyroïdie peut passer inaperçue chez les chats atteints d'une maladie rénale ou hépatique, ou d'un cancer, car les signes typiques sont masqués et la T4 peut être inhibée pour revenir dans la partie supérieure des valeurs usuelles.<sup>144,145</sup>

– L'hyperthyroïdie peut passer inaperçue chez les chats atteints de DS en raison de la ressemblance des symptômes.

– Il peut être compliqué de poser le diagnostic de bactériurie chez les chats atteints de maladie rénale, d'hyperthyroïdie ou de diabète, car les symptômes de maladie du bas appareil urinaire, de pyurie et/ou de sédiment urinaire actif ne sont pas toujours présents. Le diagnostic ne peut être confirmé que par la réalisation d'une analyse d'urine et d'une culture bactérienne.<sup>65</sup>

– L'hyperthyroïdie et la maladie cardiaque peuvent coexister, sans qu'une seule soit décelée.

– La plupart des maladies ont une composante de douleur, ce qui complique l'évaluation d'autres sources de douleur, comme la MDA, les tissus mous ou d'ordre neurologique, lorsqu'on utilise des échelles de douleur normalisées. L'examen myofascial est une solution partielle à ce dilemme diagnostique.

– L'impact des comorbidités sur la qualité de vie varie (par exemple, pendant une chimiothérapie, les nausées peuvent être pires que la douleur).

❖ L'intensité de la douleur évoluera tout au long de la vie restante du chat en fonction de la maladie et

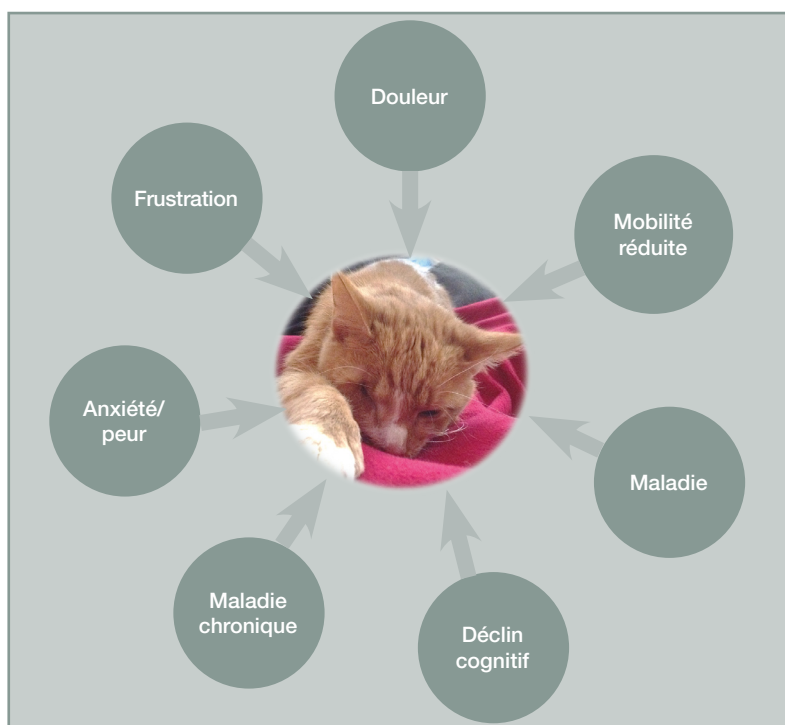

Figure 8 Considérations relatives à la qualité de vie. Avec l'aimable autorisation de Sheilah Robertson

**En tant que vétérinaires, nous devons nous associer aux propriétaires pour prendre des décisions éclairées et centrées sur le patient.**

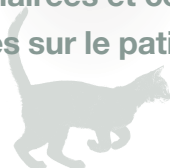

de sa progression, de la réponse au traitement, de l'état inflammatoire et des modifications du mode de vie. La prise en charge des maladies complexes peut sembler épuisante pour le praticien généraliste, mais il est souvent le mieux placé pour superviser les soins du chat, car il dispose d'une vue d'ensemble, entretient une relation avec le propriétaire et peut examiner le chat ou l'orienter vers des spécialistes si nécessaire. De même, la coexistence de plusieurs maladies peut s'avérer pesante pour les clients, et une part importante des soins prodigués par les vétérinaires consiste à soutenir le propriétaire (Encadré 9).

Les traitements d'appoint comprennent l'enrichissement et la modification de l'environnement ainsi que des traitements tels que la physiothérapie, l'acupuncture, les massages et les modalités électrophysiques. Il est possible d'instaurer de nombreuses formes d'activités positives à la maison, et la participation régulière à des séances de physiothérapie dans un établissement peut s'avérer bénéfique tant pour le chat que pour son propriétaire. Impliquer les propriétaires dans l'équipe de traitement et leur faire sentir qu'ils font partie de la solution favorise l'adhésion et, en fin de compte, accroît également le temps que le chat et le propriétaire passent ensemble. En confiant aux propriétaires des tâches qui favorisent les interactions positives, comme le brossage ou le jeu, le risque que le chat associe uniquement le propriétaire au traitement est diminué.

L'exercice contrôlé – lorsqu'il est pratiqué dans les limites, la continuité et la régularité appropriées – produit une analgésie assimilable à celle d'un médicament contre la douleur.<sup>148</sup> La pratique d'une activité physique régulière procure de multiples

**Tableau 4** Exemples d'états mentaux/émotionnels et physiques qui contribuent à une mauvaise QV

|                   | EXEMPLE                                                                                    |
|-------------------|--------------------------------------------------------------------------------------------|
| Mental/émotionnel | Anxiété                                                                                    |
|                   | Peur                                                                                       |
|                   | Isolement et solitude                                                                      |
|                   | Ennui                                                                                      |
|                   | Frustration                                                                                |
|                   | Détresse                                                                                   |
| Physique          | Douleur chronique (inadaptée) (par exemple, MDA, maladie dentaire, plaies non cicatrisées) |
|                   | Nausées et vomissements (par exemple, secondaires à la MRC)                                |
|                   | Essoufflement (par exemple, maladie respiratoire, insuffisance cardiaque congestive)       |
|                   | Soif (par exemple, DS non contrôlé, MRC)                                                   |

bienfaits : elle influence la motilité gastrique et colique, équilibre le statut immunitaire, réduit la survenue des crises d'épilepsie et améliore l'appétit et la cognition.<sup>149</sup>

Étant donné que de nombreuses affections coalescentes chez les chats âgés sont probablement liées à des déséquilibres de l'homéostasie neuro-immune, il est important de privilégier une approche qui met l'accent sur la qualité de vie et l'utilisation de traitements non pharmacologiques, parallèlement aux traitements pharmacologiques et à une surveillance appropriée.

## La qualité de vie

« Comment saurai-je que le moment est venu ? » : telle est l'une des questions que les propriétaires se posent le plus fréquemment. Aider les propriétaires à prendre la décision d'euthanasier leur chat constitue une partie essentielle de notre métier. Les comorbidités et leurs traitements, ainsi que les difficultés physiques liées au vieillissement, ont un impact sur la qualité de vie. Il existe aujourd'hui davantage d'interventions thérapeutiques et de procédures chirurgicales radicales qui permettent de prolonger la vie, mais nous devons faire passer les intérêts du patient en premier malgré la pression des propriétaires.<sup>150</sup> Ce n'est pas parce que nous pouvons le faire que nous devons le faire, mais la qualité de vie doit l'emporter sur la longévité. Les chats vivent l'instant présent et, contrairement aux humains, ils n'ont pas la capacité de savoir si « demain sera peut-être meilleur » en subissant des traitements désagréables. Nos patients ne prennent

### Les cinq piliers d'un environnement félin sain

|                                                                                                                            |
|----------------------------------------------------------------------------------------------------------------------------|
| Un lieu sûr                                                                                                                |
| Des ressources multiples et distinctes pour l'alimentation, l'abreuvement, l'élimination, les griffoirs, le repos/sommeil. |
| Avoir la possibilité de jouer et d'exprimer un comportement de prédation                                                   |
| Des interactions sociales positives et prévisibles                                                                         |
| Le respect de l'importance du sens olfactif du chat                                                                        |

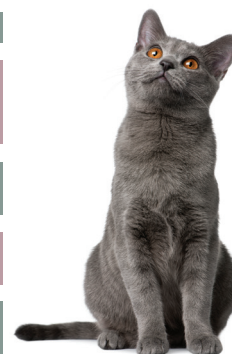

Figure 9 Les cinq piliers d'un environnement approprié.

pas des décisions eux-mêmes, mais cette responsabilité incombe à leurs propriétaires. D'où la nécessité de nous associer à ceux-ci pour prendre des décisions éclairées et centrées sur le patient.

Les animaux, les nouveau-nés, les nourrissons et les personnes souffrant de troubles cognitifs n'ont pas la capacité de déclarer eux-mêmes leur état et, par conséquent, les instruments de mesure se basant sur des données fournies par le patient lui-même ne peuvent pas être utilisés.<sup>151,152</sup> Malgré une utilisation répandue, le terme de qualité de vie (QV) concernant les animaux n'a pas de définition universellement cohérente ou acceptée, ce qui a entravé notre capacité à la mesurer. La plupart des gens ont une compréhension générale de ce que signifie le terme QV, mais il est étonnamment difficile de le verbaliser.<sup>153</sup> En voici une définition pratique : « la satisfaction d'un individu par rapport à sa santé physique

Lorsque l'équipe vétérinaire a une compréhension commune de ce que signifie la QV, les propriétaires bénéficient de conseils cohérents pour évaluer la QV de leurs chats.

**Tableau 5** Changements environnementaux visant à rendre les activités de la vie quotidienne possibles ou plus faciles, pour les chats vieillissants et ceux ayant des problèmes de santé

| Problème de santé | Fournir                                                                                                                          | Résultat                                                                                        |
|-------------------|----------------------------------------------------------------------------------------------------------------------------------|-------------------------------------------------------------------------------------------------|
| MDA<br>Sarcopénie | <input type="checkbox"/> Marche ou rampe pour accéder à des endroits surélevés                                                   | ✓ Assure l'accès à un endroit sûr                                                               |
|                   | <input type="checkbox"/> Bac à litière à entrée basse/accès facile                                                               | ✓ Maintient la propreté                                                                         |
|                   | <input type="checkbox"/> Aide au toilettage                                                                                      | ✓ Maintient les soins du pelage                                                                 |
|                   | <input type="checkbox"/> Bols d'eau et de nourriture surélevés                                                                   | ✓ Facilite l'accès aux ressources essentielles et maintient l'apport calorique et l'hydratation |
|                   | <input type="checkbox"/> Points de repos chauds                                                                                  | ✓ Maintient la chaleur corporelle                                                               |
| DS<br>MRC         | <input type="checkbox"/> Abreuvoirs multiples, de configuration variable, à différents endroits du domicile                      | ✓ Permet un accès facile à l'eau en permanence                                                  |
| SDC               | <input type="checkbox"/> Environnement stable : ne pas réorganiser les principales ressources du chat (nourriture, eau, litière) | ✓ Aide le chat à trouver les ressources essentielles                                            |

**Tableau 6** Soins améliorés suggérés pour les chats âgés

| Soins améliorés                               | Justification                                                                                   |
|-----------------------------------------------|-------------------------------------------------------------------------------------------------|
| Exhausteurs de goût<br>Aliments à forte odeur | Avec l'âge, la fonction sensorielle diminue, y compris l'odorat                                 |
| Coupe régulière des griffes                   | Les griffes sont plus fragiles et le comportement de grattage peut diminuer en raison de la MDA |
| Aide au toilettage                            | L'auto-toilettage peut être inhibé par la MDA                                                   |

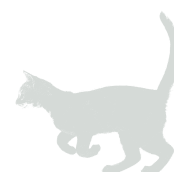

et psychologique, son environnement physique et social et sa capacité à interagir cet environnement». <sup>152</sup> La « santé » est l'état d'absence de maladie ou de blessure tandis que la « satisfaction » désigne le fait de combler ses besoins individuels ou un état d'humeur positif. <sup>152</sup> Lorsque l'équipe vétérinaire a une compréhension commune de ce que signifie la QV, les propriétaires bénéficient de conseils cohérents pour évaluer la QV de leurs chats.

La QV et la QVLS sont deux notions différentes. La QV est un terme général qui prend en compte tous les aspects de la vie de l'animal, y compris la santé physique et mentale. En revanche, la QVLS renvoie à l'effet spécifique d'une affection médicale sur la santé d'un individu. Un instrument de QVLS est capable à la fois de détecter la maladie (capacité de discrimination) et de mesurer les changements en matière de santé dans le temps (capacité d'évaluation). <sup>154</sup>

Comment rendre accessible, objectif et mesurable un problème interne, privé et uniquement individuel ? En tant qu'observateurs, nous ne pouvons pas faire état avec précision de l'intensité de la douleur d'un chat. En revanche, nous pouvons faire état des changements de comportement que l'on pense être le résultat de la douleur. Par conséquent, la QV ne peut être évaluée chez les chats qu'à l'aide de déclarations par personne interposée ou d'observations directes ; la personne interposée peut être le propriétaire, un professionnel vétérinaire ou la combinaison des deux. On parle alors de résultats liés à l'observateur.

La douleur est un état affectif (émotion) et est toujours désagréable, mais elle n'est pas le seul sentiment désagréable associé à la maladie chronique. D'autres éléments à prendre en compte sont présentés dans la Figure 8 et le Tableau 4.

Il est urgent de concevoir des outils d'évaluation fondés sur des preuves pour éclairer la prise de décision clinique. Grâce à un consensus des spécialistes, les problèmes de bien-être des félins au Royaume-Uni, tant au niveau individuel que communautaire, ont été classés par ordre de priorité. <sup>155</sup> La priorité (classement) des problèmes a été déterminée sur la base de leur gravité et leur durée. Dans le cadre de ce « Guide de recommandations 2021 de l'AAFP sur les soins apportés aux chats âgés », il est intéressant de noter que parmi les 10 principaux problèmes de bien-être identifiés, les maladies de la vieillesse ont été classées au deuxième rang des priorités, et l'euthanasie tardive au deuxième rang des prévalences. <sup>155</sup>

En médecine vétérinaire, les questionnaires destinés aux propriétaires et les échelles d'observation remplies par les cliniciens sont fréquemment utilisés pour objectiver le subjectif. <sup>156</sup> Les instruments d'évaluation des résultats doivent avoir des attributs spécifiques :

- ❖ **Validité** : il est prouvé qu'ils mesurent ce qui est prévu. Cela nécessite une définition acceptée de ce qui est mesuré.
- ❖ **Fiabilité** : étroite concordance entre différents observateurs.
- ❖ **Réactivité et sensibilité** : capacité à détecter des changements cliniques dans le temps ou après un traitement.

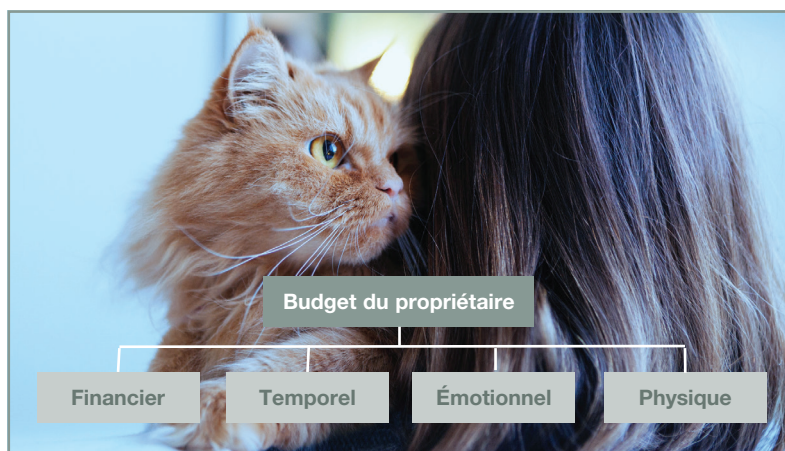

Figure 10 Les quatre budgets alloués aux soins. Avec l'aimable autorisation de Sheilah Robertson

**Le Groupe de travail reconnaît que les propriétaires de chats ont quatre budgets qui doivent tous être pris en compte lors de l'élaboration des plans de traitement.**

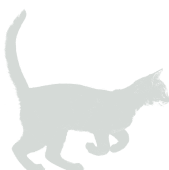

La mise en place d'instruments fiables pour évaluer les états subjectifs nécessite des méthodologies psychométriques spécifiques, qui prennent du temps mais en valent la peine. <sup>153,157,158</sup> Les questions relatives à la qualité de vie des chats que nous devrions nous poser dépendent au final de la connaissance de ce qui importe pour chaque chat. Des informations détaillées sur la QV et les instruments de QVLS sont fournis dans les documents complémentaires (voir page 632).

### Changements environnementaux

Pour maintenir les cinq piliers d'un environnement approprié, il faut modifier la maison ou le mode de vie du chat en fonction du vieillissement ou de la maladie. Ces cinq piliers sont décrits de manière approfondie dans les « Lignes directrices 2013 de l'AAFP sur les besoins environnementaux des félins » (2013 AAFP and ISFM Feline Environmental Needs Guidelines) <sup>8</sup> et sont résumés dans la Figure 9. Les Tableaux 5 et 6 résument les changements environnementaux et les modifications des soins qui peuvent s'avérer nécessaires pour les chats vieillissants.

### Fin de vie

#### Les soins palliatifs et en hospices

En médecine humaine, lorsqu'un diagnostic de fin de vie est posé, le défaut classique a été de traiter et de prolonger la vie, mais avec l'émergence des spécialistes des soins palliatifs et d'hospices, il existe désormais des options sur la façon dont « la fin sera ». Les soins palliatifs et d'hospices sont des spécialités encore relativement nouvelles en médecine humaine et bien plus récentes en médecine vétérinaire. <sup>159</sup> Le grand public pense souvent que l'hospice est « un endroit » synonyme d'« abandon ». Il est absolument

nécessaire d'éduquer les gens sur sa signification réelle : pour les propriétaires de chats, une possibilité pour leur chat de vivre bien jusqu'à la fin.

✦ **Les soins palliatifs** portent sur le traitement de la douleur, de la mobilité réduite, des déficits nutritionnels, de l'anxiété et d'autres signes cliniques tels que les nausées et les vomissements, afin d'obtenir la meilleure qualité de vie possible, quelle que soit l'issue de la maladie (par exemple, « soins de confort » avec ou sans visée curative). Ils s'appliquent aux maladies curables ou chroniques ainsi qu'aux soins de fin de vie, et peuvent être dispensés à des patients de tout âge et à tout moment au cours d'une maladie. Les soins palliatifs incluent le soutien aux propriétaires qui s'occupent de leur(s) animal(aux) et l'aide à la prise de décision.

✦ **Les soins d'hospices** sont une forme spécialisée de soins palliatifs qui portent essentiellement sur les soins aux patients pendant les derniers stades d'une maladie. En médecine vétérinaire, il peut s'agir de soins de confort sans visée curative, soit parce qu'il n'y a pas d'autres options, soit parce que les propriétaires ont choisi de ne pas poursuivre le traitement car les chances de réussite sont minces, que les effets secondaires l'emportent sur les avantages ou que le coût du traitement dépasse leur budget. Les soins d'hospices pour les patients félins n'excluent pas l'euthanasie et peuvent être considérés comme un pont entre une maladie en phase terminale et l'euthanasie ; ils peuvent constituer une période courte (quelques jours) ou plus longue (des semaines à des mois). Les soins d'hospices comprennent également le soutien de la famille de l'animal.

### Les budgets alloués aux soins

Certains questionnaires de QV spécifiques à une maladie prennent en compte le chat lui-même ainsi que ses propriétaires.<sup>159</sup> Un outil développé pour examiner l'incidence des maladies de la peau a montré que la QV était différente entre les chats en bonne santé et ceux atteints de dermatite allergique de contact, et que la QV dans ce dernier groupe s'améliorait avec le traitement.<sup>160</sup> Un sommeil perturbé, une aversion pour les traitements, des changements d'appétit et des routines quotidiennes perturbées contribuent à une mauvaise QV. En ce qui concerne les propriétaires, les conséquences psychologiques qu'ils subissent en apportant des soins aux chats atteints de maladies de la peau sont des sentiments de tristesse, de frustration, de culpabilité et de stress liés à l'administration de médicaments ou de traitements. S'occuper de ces chats requiert du temps et de l'argent. De surcroît, le lien humain-animal peut être négativement affecté. La gravité de la maladie du chat a une forte corrélation avec la qualité de vie du propriétaire.<sup>159</sup>

Il est important d'étudier l'incidence de la maladie d'un chat en fonction de son propriétaire. Le Groupe de travail reconnaît que les propriétaires de chats disposent de quatre budgets qui doivent tous être pris en compte lors de l'élaboration des plans de traitement, y compris l'euthanasie : financier, temporel, émotionnel et physique (Figure 10). Le « poids » de chacun de ces éléments varie selon les propriétaires et

ces budgets, combinés à la qualité de vie de l'animal, orienteront la prise de décisions cliniques.

### Prise de décisions éthiques et conversations difficiles

Lorsqu'une maladie grave est diagnostiquée, notre devoir est d'être honnête avec le client, mais beaucoup trouvent ce type de nouvelle difficile à annoncer. Les propriétaires peuvent demander des traitements de prolongation de la vie que nous jugeons futiles et nuisibles, ce qui entraîne un stress moral important.<sup>150,161</sup> Si l'approche de la prise de décision éthique était moins subjective et personnelle, il serait peut-être possible de diminuer le stress au sein de notre profession. Un groupe de travail vétérinaire mis en place par le Collège européen d'anesthésie et d'analgesie vétérinaire a créé le « Veterinary Ethics Tool (VET) » (outil d'éthique vétérinaire) pour aider à la prise de décision éthique. Il utilise une série de checklists et de tableaux, ainsi qu'un système de feux tricolores avec le vert (raisons valables pour l'acte médical), l'orange (reconsidérer la procédure et vos responsabilités) et le rouge (envisager d'autres options de traitement) pour orienter le vétérinaire.<sup>162</sup>

Le « Serious Veterinary Illness Conversation Guide » est une autre ressource basée sur des recommandations semblables destinées aux médecins qui prennent en charge les patients en fin de vie.<sup>160</sup> Les lignes directrices et les checklists en matière de conversations sur les maladies graves peuvent nous aider à rester sur la bonne voie, à gérer les problèmes complexes et à élaborer un plan pour aller de l'avant. Une question clé à poser lors de cette conversation serait de demander au propriétaire ce que son chat voudrait dans la situation dans laquelle il se trouve ; elle permet de réorienter le processus de pensée du propriétaire par rapport à ce qu'il veut. Lors de ces conversations, il est important de mentionner le sexe et le nom exacts du chat.

### Le deuil anticipé

Le deuil anticipé est un processus normal par lequel les futurs endeuillés peuvent commencer à éprouver des changements émotionnels associés à la mort. Le deuil anticipé présente de nombreuses caractéristiques du deuil vécu après une perte, et peut atténuer l'intensité des réactions de deuil après le décès effectif.<sup>163</sup> L'impact de la perte d'un animal de compagnie sur les individus ou les familles ne doit pas être sous-estimé. Il est important de soutenir les familles de manière proactive pendant cette période, notamment en leur fournissant des ressources ou en les orientant vers des conseillers en matière de deuil. L'équipe vétérinaire peut fournir des informations afin que les propriétaires puissent se préparer à ce qui les attend ; par exemple, expliquer le processus d'euthanasie permet d'éliminer certains éléments de l'inconnu.

### L'euthanasie

L'euthanasie est un point limite éthique ; c'est une option de traitement pour un chat malade, pas un échec. Les décisions de fin de vie sont parmi les plus difficiles à prendre pour les propriétaires. La

façon dont les vétérinaires gèrent le « dernier rendez-vous » et soutiennent les propriétaires à une incidence sur la possibilité que ceux-ci acquièrent un autre animal et reviennent comme clients. L'AAFP a créé une trousse d'outils éducatifs sur la fin de vie<sup>164</sup> qui contient des informations pratiques sur la prise de décision, la qualité de vie, le processus d'euthanasie, l'expérience de l'euthanasie, les dispositions finales, une foire aux questions et des ressources pour les clients.

## Autres documents

Les documents suivants sont disponibles en ligne sur [jfms.com](http://jfms.com) et peuvent être consultés sur [catvets.com/senior-care](http://catvets.com/senior-care) :

- ❖ Vidéo démontrant la technique d'examen de la douleur myofasciale.
- ❖ Vidéo montrant des conseils adaptés aux chats pour un examen dentaire félin complet.
- ❖ Informations sur les instruments de QV et de QVLS.
- ❖ Brochure destinée aux clients (voir Annexe, page 637).
- ❖ Ressources recommandées.

Les documents supplémentaires disponibles sur [catvets.com/senior-care](http://catvets.com/senior-care), en plus des ressources énumérées ci-dessus, incluent « Pourquoi les comorbidités sont-elles la « nouvelle » norme pour les chats ? »<sup>123</sup> et une vidéo montrant la douleur lors des sauts.

## Remerciements

Le Groupe de travail tient à remercier le Dr Kathleen Neumann pour sa contribution à la préparation du manuscrit des Recommandations.

Cette version française a été rendue possible avec la contribution de Vetoquinol et de la Société Francophone de Médecine Féline, que nous remercions.

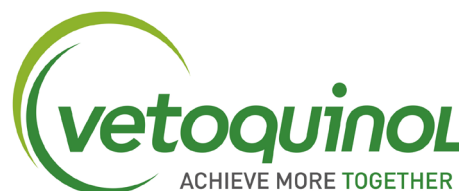

## Conflit d'intérêts

Hazel Carney est conférencière pour Royal Canin. Jessica Quimby est une leader d'opinion clé pour Boehringer Ingelheim Animal Health USA, Inc, Dechra, Elanco, Gallant Health Care, Heska, Hill's Pet Nutrition, Inc, IDEXX Laboratories, Inc, Kindred Biosciences, Inc., Purina ProPlan Veterinary Diets, Royal Canin et Zoetis Petcare. Sheilah Robertson assume tour à tour les rôles de leader d'opinion, de

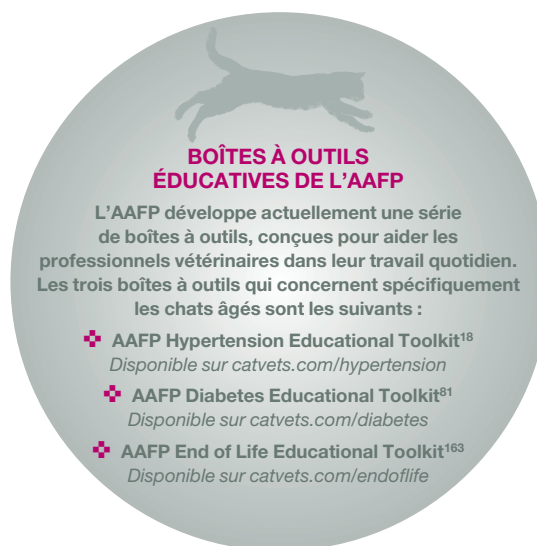

## POINTS CLÉS

- ❖ Les chats vivent plus longtemps, ce qui peut refléter le propre vieillissement de leurs propriétaires ; ils font donc souvent partie intégrante de la vie de leurs soignants, apportant l'espoir et le soutien émotionnel qu'un propriétaire souhaite préserver.
- ❖ Les chats âgés méritent les meilleurs soins possibles que les professionnels vétérinaires puissent offrir. Ce document sur les Recommandations propose des connaissances sur les soins aux chats âgés qui permettent au vétérinaire d'intégrer de la compassion et de la dignité à de remarquables recommandations comportementales, psychologiques et médicales. Il prend en compte les options diagnostiques et thérapeutiques considérablement accrues qui sont plus largement disponibles aujourd'hui.
- ❖ Les discussions avec les propriétaires tout au long de la vie d'un chat âgé permettent aux vétérinaires de préparer le terrain pour un vieillissement félin optimal, d'aider le propriétaire à comprendre ce que son chat peut ressentir et de suggérer des modifications à la maison pour faciliter la transition du chat vers la fin de sa vie.
- ❖ Les propriétaires qui savent quels comportements et activités observer, et la signification des différents changements dans ces comportements, peuvent alors choisir les tests et les traitements les plus bénéfiques pour le chat, tout en lui causant le moins de soucis.
- ❖ En établissant un lien de confiance, le vétérinaire et le propriétaire peuvent s'assurer que les décisions majeures sont réellement prises en connaissance de cause de ce qui est le mieux pour chaque chat individuel.

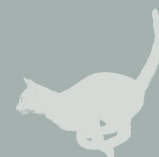

conférencière et de consultante pour Elanco, Zoetis Petcare et Jurox. Les autres membres du Groupe de travail n'ont aucun conflit d'intérêts à déclarer.

## Financement

Ces Recommandations ont bénéficié d'une subvention à l'éducation accordée à l'AAFP par Boehringer Ingelheim Animal Health USA Inc, IDEXX Laboratories, Inc, Merck Animal Health, Purina Pro Plan Veterinary Diets, Royal Canin et Zoetis Petcare. Les auteurs n'ont reçu aucun soutien financier pour la recherche, la rédaction et/ou la publication de cet article.

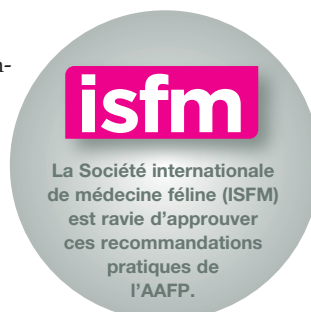

## Approbation éthique

Ce travail n'impliquant pas l'utilisation d'animaux, une approbation éthique n'était pas spécifiquement requise pour la publication dans JFMS.

## Consentement éclairé

Ce travail n'a pas impliqué l'utilisation d'animaux (y compris des cadavres) et n'a donc pas requis un consentement éclairé. Un consentement éclairé (verbal ou écrit) a été obtenu auprès des personnes concernées pour tout animal ou personne identifiable individuellement dans cette publication.

### Avis de non-responsabilité

Cette publication est une traduction complète et fidèle de la version originale en langue anglaise. Les auteurs, les éditeurs, les sociétés (AAFP et ISFM) et l'éditeur (SAGE Publications) n'acceptent aucune responsabilité légale pour les erreurs ou omissions qui pourraient être commises dans cette traduction. Les sociétés et l'éditeur ne donnent aucune garantie, expresse ou implicite, concernant le matériel contenu dans ce document et n'acceptent aucune responsabilité pour toute erreur commise lors de la traduction de l'article.

## Références

- Pittari J, Rodan I, Beekman G, et al. **American Association of Feline Practitioners: senior care guidelines.** *J Feline Med Surg* 2009; 11: 763–778.
- Quimby J, Gowland S, Carney HC, et al. **2021 AAHA/AAFP feline life stage guidelines.** *J Feline Med Surg* 2021; 23: 211–233.
- O'Neill DG, Church DB, McGreevy PD, et al. **Longevity and mortality of cats attending primary care veterinary practices in England.** *J Feline Med Surg* 2015; 17: 125–133.
- Egenvall A, Nødtvedt A, Häggström J, et al. **Mortality of life-insured Swedish cats during 1999–2006: age, breed, sex, and diagnosis.** *J Vet Intern Med* 2009; 23: 1175–1183.
- Ali S and Garcia JM. **Sarcopenia, cachexia and aging: diagnosis, mechanisms and therapeutic options – a mini-review.** *Gerontology* 2014; 60: 294–305.
- Freeman LM. **Cachexia and sarcopenia: emerging syndromes of importance in dogs and cats.** *J Vet Intern Med* 2012; 26: 3–17.
- Laflamme DP. **Understanding the nutritional needs of healthy cats and those with diet-sensitive conditions.** *Vet Clin North Am Small Anim Pract* 2020; 50: 905–924.
- Ellis SLH, Rodan I, Carney HC, et al. **AAFP and ISFM feline environmental needs guidelines.** *J Feline Med Surg* 2013; 15: 219–230.
- Miele A, Sordo L and Gunn-Moore DA. **Feline aging: promoting physiologic and emotional well-being.** *Vet Clin North Am Small Anim Pract* 2020; 50: 719–748.
- Scherk M (ed). **Feline practice: integrating medicine and well-being (part 1).** *Vet Clin North Am Small Anim Pract* 2020; 50: 653–904.
- Rodan I, Sundahl E, Carney H, et al. **AAFP and ISFM feline-friendly handling guidelines.** *J Feline Med Surg* 2011; 13: 364–375.
- Epstein ME, Rodan I, Griffenhagen G, et al. **2015 AAHA/AAFP pain management guidelines for dogs and cats.** *J Feline Med Surg* 2015; 17: 251–272.
- Bijsmans ES, Jepson RE, Chang YM, et al. **Changes in systolic blood pressure over time in healthy cats and cats with chronic kidney disease.** *J Vet Intern Med* 2015; 29: 855–861.
- Jepson RE. **Feline systemic hypertension. Classification and pathogenesis.** *J Feline Med Surg* 2011; 13: 35–43.
- Maggio F, DeFrancesco TC, Atkins CE, et al. **Ocular lesions associated with systemic hypertension in cats: 69 cases (1985–1998).** *J Am Vet Med Assoc* 2000; 217: 695–702.
- Brown S, Atkins C, Bagley R, et al. **Guidelines for the identification, evaluation, and management of systemic hypertension in dogs and cats.** *J Vet Intern Med* 2007; 21: 542–558.
- Taylor SS, Sparkes AH, Briscoe K, et al. **ISFM consensus guidelines on the diagnosis and management of hypertension in cats.** *J Feline Med Surg* 2017; 19: 288–303.
- AAFP. **2021 Hypertension educational toolkit.** Available at: catvets.com/hypertension.
- Williams DL and Heath MF. **Prevalence of feline cataract: results of a cross-sectional study of 2000 normal animals, 50 cats with diabetes and one hundred cats following dehydration crises.** *Vet Ophthalmol* 2006; 9: 341–349.
- Guyonnet A, Donzel E, Bourguet A, et al. **Epidemiology and clinical presentation of feline cataracts in France: a retrospective study of 268 cases.** *Vet Ophthalmol* 2019; 22: 116–124.
- Sebbag L, Kass PH and Maggs DJ. **Reference values, intertest correlations, and test-retest repeatability of selected tear film tests in healthy cats.** *J Am Vet Med Assoc* 2015; 246: 426–435.
- Sandhas E, Merle R and Eule JC. **Consider the eye in preventive healthcare – ocular findings, intraocular pressure and Schirmer tear test in ageing cats.** *J Feline Med Surg* 2018; 20: 1063–1071.
- Stiles J and Kimmitt B. **Eye examination in the cat: step-by-step approach and common findings.** *J Feline Med Surg* 2016; 18: 702–711.
- Carter J. **Hypertensive ocular disease in cats: a guide to fundic lesions to facilitate early diagnosis.** *J Feline Med Surg* 2019; 21: 35–45.
- Norsworthy GD, Adams VJ, McElhane MR, et al. **Relationship between semi-quantitative thyroid palpation and total thyroxine concentration in cats with and without hyperthyroidism.** *J Feline Med Surg* 2002; 4: 139–143.
- Paepe D, Smets P, van Hoek I, et al. **Within- and between-examiner agreement for two thyroid palpation techniques in healthy and hyperthyroid cats.** *J Feline Med Surg* 2008; 10: 558–565.
- Boretti FS, Sieber-Ruckstuhl NS, Gerber B, et al. **Thyroid enlargement and its relationship to clinicopathological parameters and T4 status in suspected hyperthyroid cats.** *J Feline Med Surg* 2009; 11: 286–292.
- Little S, Levy J, Hartmann K, et al. **2020 AAFP feline retrovirus testing and management guidelines.** *J Feline Med Surg* 2020; 22: 5–30.
- Bennett D, Zainal Ariffin SM bt and Johnston P. **Osteoarthritis in the cat: 1. How common is it and how easy to recognise?** *J Feline Med Surg* 2012; 14: 65–75.

- 30 Kranenburg HC, Meij BP, van Hofwegen EML, et al. **Prevalence of spondylosis deformans in the feline spine and correlation with owner-perceived behavioural changes.** *Vet Comp Orthop Traumatol* 2012; 25: 217–223.
- 31 Slingerland LL, Hazewinkel HAW, Meij BP, et al. **Cross-sectional study of the prevalence and clinical features of osteoarthritis in 100 cats.** *Vet J* 2011; 187: 304–309.
- 32 Little S (ed). *The cat: clinical medicine and management*. St Louis, MO: Elsevier Saunders, 2012.
- 33 Whitlock EL and Whittington RA. **The frailty syndrome: anesthesiologists must understand more and fear less.** *Anesth Analg* 2020; 130: 1445–1448.
- 34 Fried LP, Tangen CM, Walston J, et al. **Frailty in older adults: evidence for a phenotype.** *J Gerontol A Biol Sci Med Sci* 2001; 56: M146–156.
- 35 Mitnitski AB, Mogilner AJ and Rockwood K. **Accumulation of deficits as a proxy measure of aging.** *Sci World J* 2001; 1: 323–336.
- 36 Scarlett JM, Donoghue S, Saidla J, et al. **Overweight cats: prevalence and risk factors.** *Int J Obes Relat Metab Disord* 1994; 18 Suppl 1: S22–28.
- 37 Harper EJ. **Changing perspectives on aging and energy requirements: aging, body weight and body composition in humans, dogs and cats.** *J Nutr* 1998; 128 Suppl 12: 27S–31S.
- 38 Teng KT, McGreevy PD, Toribio JL, et al. **Strong associations of nine-point body condition scoring with survival and lifespan in cats.** *J Feline Med Surg* 2018; 20: 1110–1118.
- 39 Laflamme DP and Ballam JM. **Effect of age on maintenance energy requirements of adult cats.** *Compend Contin Educ Pract Vet* 2002; 24: 82.
- 40 Cupp C, Perez-Camargo G, Patil A, et al. **Long-term food consumption and body weight changes in a controlled population of geriatric cats.** *Compend Contin Educ Small Anim Pract* 2004; 26: 60.
- 41 Bellows J, Center S, Daristotle L, et al. **Evaluating aging in cats: how to determine what is healthy and what is disease.** *J Feline Med Surg* 2016; 18: 551–570.
- 42 Rollins AW and Murphy M. **Nutritional assessment in the cat: practical recommendations for better medical care.** *J Feline Med Surg* 2019; 21: 442–448.
- 43 Taylor EJ, Adams C and Neville R. **Some nutritional aspects of ageing in dogs and cats.** *Proc Nutr Soc* 1995; 54: 645–656.
- 44 Freiche V, Deswarte G, Soulard Y, et al. **A psyllium-enriched dry extruded diet improves recurrent feline constipation [abstract].** *J Vet Intern Med* 2010; 24: 1547.
- 45 Tam FM, Carr AP and Myers SL. **Safety and palatability of polyethylene glycol 3350 as an oral laxative in cats.** *J Feline Med Surg* 2011; 13: 694–697.
- 46 Stone AES, Brummett GO, Carozza EM, et al. **2020 AAHA/AAFP feline vaccination guidelines.** *J Feline Med Surg* 2020; 22: 813–830.
- 47 Clarke DE and Caiafa A. **Oral examination in the cat: a systematic approach.** *J Feline Med Surg* 2014; 16: 873–886.
- 48 Whyte A, Gracia A, Bonastre C, et al. **Oral disease and microbiota in free-roaming cats.** *Top Companion Anim Med* 2017; 32: 91–95.
- 49 Ingham KE, Gorrel C, Blackburn J, et al. **Prevalence of odontoclastic resorptive lesions in a population of clinically healthy cats.** *J Small Anim Pract* 2001; 42: 439–443.
- 50 Whyte A, Lacasta S, Whyte J, et al. **Tooth resorption in Spanish domestic cats: preliminary data.** *Top Companion Anim Med* 2020; 38. DOI: 10.1016/j.tcam.2019.100369.
- 51 Niemiec B, Gawor J, Nemec A, et al. **World Small Animal Veterinary Association global dental guidelines.** *J Small Anim Pract* 2020; 61: 395–403.
- 52 Brodbelt DC, Pfeiffer DU, Young LE, et al. **Risk factors for anaesthetic-related death in cats: results from the confidential enquiry into perioperative small animal fatalities (CEPSAF).** *Br J Anaesth* 2007; 99: 617–623.
- 53 Robertson SA, Gogolski SM, Pascoe P, et al. **AAFP feline anesthesia guidelines.** *J Feline Med Surg* 2018; 20: 602–634.
- 54 Carney HC, Little S, Brownlee-Tomasso D, et al. **AAFP and ISFM feline-friendly nursing care guidelines.** *J Feline Med Surg* 2012; 14: 337–349.
- 55 Davis H, Jensen T, Johnson A, et al. **2013 AAHA/AAFP fluid therapy guidelines for dogs and cats.** *J Am Anim Hosp Assoc* 2013; 49: 149–159.
- 56 Alvis BD and Hughes CG. **Physiology considerations in geriatric patients.** *Anesthesiol Clin* 2015; 33: 447–456.
- 57 Blatteis CM. **Age-dependent changes in temperature regulation – a mini review.** *Gerontology* 2012; 58: 289–295.
- 58 Sparkes AH, Caney S, Chalhoub S, et al. **ISFM consensus guidelines on the diagnosis and management of feline chronic kidney disease.** *J Feline Med Surg* 2016; 18: 219–239.
- 59 International Renal Interest Society. **IRIS staging of CKD.** [http://www.iris-kidney.com/pdf/IRIS\\_Staging\\_of\\_CKD\\_modified\\_2019.pdf](http://www.iris-kidney.com/pdf/IRIS_Staging_of_CKD_modified_2019.pdf) (2019, accessed February 6, 2020).
- 60 Quimby JM and Lunn KF. **Mirtazapine as an appetite stimulant and anti-emetic in cats with chronic kidney disease: a masked placebo-controlled crossover clinical trial.** *Vet J* 2013; 197: 651–655.
- 61 Ross SJ, Osborne CA, Kirk CA, et al. **Clinical evaluation of dietary modification for treatment of spontaneous chronic kidney disease in cats.** *J Am Vet Med Assoc* 2006; 229: 949–957.
- 62 King JN, Tasker S, Gunn-Moore DA, et al. **Prognostic factors in cats with chronic kidney disease.** *J Vet Intern Med* 2007; 21: 906–916.
- 63 Chakrabarti S, Syme HM and Elliott J. **Clinicopathological variables predicting progression of azotemia in cats with chronic kidney disease.** *J Vet Intern Med* 2012; 26: 275–281.
- 64 Syme HM, Markwell PJ, Pfeiffer D, et al. **Survival of cats with naturally occurring chronic renal failure is related to severity of proteinuria.** *J Vet Intern Med* 2006; 20: 528–535.
- 65 Mayer-Roenne B, Goldstein RE and Erb HN. **Urinary tract infections in cats with hyperthyroidism, diabetes mellitus and chronic kidney disease.** *J Feline Med Surg* 2007; 9: 124–132.
- 66 Dorsch R, Teichmann-Knorrn S and Sjetne Lund H. **Urinary tract infection and subclinical bacteriuria in cats: a clinical update.** *J Feline Med Surg* 2019; 21: 1023–1038.
- 67 Quimby JM, Gustafson DL and Lunn KF. **The pharmacokinetics of mirtazapine in cats with chronic kidney disease and in age-matched control cats.** *J Vet Intern Med* 2011; 25: 985–989.
- 68 Quimby JM, Lorbach S, Saffire A, et al. **Pharmacokinetics of gabapentin in cats with chronic kidney disease [abstract].** *J Vet Intern Med* 2020; 34: 2825–2826.
- 69 Peterson ME. **Hyperthyroidism in cats: what's causing this epidemic of thyroid disease and can we prevent it?** *J Feline Med Surg* 2012; 14: 804–818.
- 70 Carney HC, Ward CR, Bailey SJ, et al. **2016 AAFP guidelines for the management of feline hyperthyroidism.** *J Feline Med Surg* 2016; 18: 400–416.
- 71 Samaha G, Beatty J, Wade CM, et al. **The Burmese cat as a genetic model of type 2 diabetes in humans.** *Anim Genet* 2019; 50: 319–325.
- 72 Rand J. **Feline diabetes mellitus.** In: Mooney CT and Peterson ME (eds). *BSAVA manual of canine and feline endocrinology*. Gloucester: British Small Animal Veterinary Association, 2012, pp 133–147.
- 73 Gostelow R, Forcada Y, Graves T, et al. **Systematic review of feline diabetic remission: separating fact from opinion.** *Vet J* 2014; 202: 208–221.
- 74 Roomp K and Rand J. **Intensive blood glucose control is safe and effective in diabetic cats using home monitoring and treatment with glargine.** *J Feline Med Surg* 2009; 11: 668–682.
- 75 Cook A. **Diabetes mellitus: why cats are different.** <https://www.youtube.com/watch?v=qSfYCKdaeY?> (2020, accessed month day, year).
- 76 Forcada Y, German AJ, Noble PJM, et al. **Determination of serum fPLI concentrations in cats with diabetes mellitus.** *J Feline Med Surg* 2008; 10: 480–487.
- 77 Reusch CE, Kley S and Casella M. **Home monitoring of the diabetic cat.** *J Feline Med Surg* 2006; 8: 119–127.
- 78 Casella M, Hässig M and Reusch CE. **Home-monitoring of blood glucose in cats with diabetes mellitus: evaluation over a 4-month period.** *J Feline Med Surg* 2005; 7: 163–171.
- 79 Alt N, Kley S, Haessig M, et al. **Day-to-day variability of blood glucose concentration curves at home in cats with diabetes mellitus.** *J Am Vet Med Assoc* 2007; 230: 1011–1017.

- 80 Sparkes AH, Cannon M, Church D, et al. **ISFM consensus guidelines on the practical management of diabetes mellitus in cats.** *J Feline Med Surg* 2015; 17: 235–250.
- 81 AAFP. **2019 Diabetes educational toolkit.** Available at: [catvets.com/diabetes](http://catvets.com/diabetes).
- 82 Perry R and Tutt C. **Periodontal disease in cats: back to basics – with an eye on the future.** *J Feline Med Surg* 2015; 17: 45–65.
- 83 Watanabe R, Doodnaught GM, Evangelista MC, et al. **Inter-rater reliability of the Feline Grimace Scale in cats undergoing dental extractions.** *Front Vet Sci* 2020; 7: 302. DOI: 10.3389/fvets.2020.00302.
- 84 Bellows J, Center S, Daristotle L, et al. **Aging in cats: common physical and functional changes.** *J Feline Med Surg* 2016; 18: 533–550.
- 85 Benjamin SE and Drobatz KJ. **Retrospective evaluation of risk factors and treatment outcome predictors in cats presenting to the emergency room for constipation.** *J Feline Med Surg* 2020; 22: 153–160.
- 86 de Brito Galvão JF, Parker V, Schenck PA, et al. **Update on feline ionized hypercalcemia.** *Vet Clin North Am Small Anim Pract* 2017; 47: 273–292.
- 87 Williams JM, Panciera DL, Larson MM, et al. **Ultrasonographic findings of the pancreas in cats with elevated serum pancreatic lipase immunoreactivity.** *J Vet Intern Med* 2013; 27: 913–918.
- 88 Graf R, Grüntzig K, Boo G, et al. **Swiss Feline Cancer Registry 1965–2008: the influence of sex, breed and age on tumour types and tumour locations.** *J Comp Pathol* 2016; 154: 195–210.
- 89 Ho NT, Smith KC and Dobromylskyj MJ. **Retrospective study of more than 9000 feline cutaneous tumours in the UK: 2006–2013.** *J Feline Med Surg* 2018; 20: 128–134.
- 90 Monteiro BP and Steagall PV. **Chronic pain in cats: recent advances in clinical assessment.** *J Feline Med Surg* 2019; 21: 601–614.
- 91 Lascelles BDX, Henry JB, Brown J, et al. **Cross-sectional study of the prevalence of radiographic degenerative joint disease in domesticated cats.** *Vet Surg* 2010; 39: 535–544.
- 92 Godfrey D and Vaughan L. **Historical prevalence of radiological appendicular osteoarthritis in cats (1972–1973).** *J Am Anim Hosp Assoc* 2018; 54: 209–212.
- 93 Adrian D, Papich M, Baynes R, et al. **Chronic maladaptive pain in cats: a review of current and future drug treatment options.** *Vet J* 2017; 230: 52–61.
- 94 Benito J, DePuy V, Hardie E, et al. **Reliability and discriminatory testing of a client-based metrology instrument, feline musculoskeletal pain index (FMPI) for the evaluation of degenerative joint disease-associated pain in cats.** *Vet J* 2013; 196: 368–373.
- 95 Benito J, Hansen B, Depuy V, et al. **Feline musculoskeletal pain index: responsiveness and testing of criterion validity.** *J Vet Intern Med* 2013; 27: 474–482.
- 96 Gruen ME, Griffith EH, Thomson AE, et al. **Criterion validation testing of clinical metrology instruments for measuring degenerative joint disease associated mobility impairment in cats.** *PLoS One* 2015; 10. DOI: 10.1371/journal.pone.0131839.
- 97 Enomoto M, Lascelles BDX and Gruen ME. **Development of a checklist for the detection of degenerative joint disease-associated pain in cats.** *J Feline Med Surg* 2020; 22: 1137–1147.
- 98 Gruen ME, Griffith E, Thomson A, et al. **Detection of clinically relevant pain relief in cats with degenerative joint disease associated pain.** *J Vet Intern Med* 2014; 28: 346–350.
- 99 Guedes AGP, Meadows JM, Pypendop BH, et al. **Assessment of the effects of gabapentin on activity levels and owner-perceived mobility impairment and quality of life in osteoarthritic geriatric cats.** *J Am Vet Med Assoc* 2018; 253: 579–585.
- 100 Monteiro BP, Klinck MP, Moreau M, et al. **Analgesic efficacy of tramadol in cats with naturally occurring osteoarthritis.** *PLoS One* 2017; 12. DOI: 10.1371/journal.pone.0175565.
- 101 Guedes AGP, Meadows JM, Pypendop BH, et al. **Evaluation of tramadol for treatment of osteoarthritis in geriatric cats.** *J Am Vet Med Assoc* 2018; 252: 565–571.
- 102 Marino CL, Lascelles BDX, Vaden SL, et al. **Prevalence and classification of chronic kidney disease in cats randomly selected from four age groups and in cats recruited for degenerative joint disease studies.** *J Feline Med Surg* 2014; 16: 465–472.
- 103 Gowan RA, Lingard AE, Johnston L, et al. **Retrospective case-control study of the effects of long-term dosing with meloxicam on renal function in aged cats with degenerative joint disease.** *J Feline Med Surg* 2011; 13: 752–761.
- 104 Gowan RA, Baral RM, Lingard AE, et al. **A retrospective analysis of the effects of meloxicam on the longevity of aged cats with and without overt chronic kidney disease.** *J Feline Med Surg* 2012; 14: 876–881.
- 105 King JN, King S, Budsberg SC, et al. **Clinical safety of robenacoxib in feline osteoarthritis: results of a randomized, blinded, placebo-controlled clinical trial.** *J Feline Med Surg* 2016; 18: 632–642.
- 106 KuKanich K, George C, Roush JK, et al. **Effects of low-dose meloxicam in cats with chronic kidney disease.** *J Feline Med Surg* 2021; 23: 138–148.
- 107 Gruen ME, Thomson AE, Griffith EH, et al. **A feline-specific anti-nerve growth factor antibody improves mobility in cats with degenerative joint disease-associated pain: a pilot proof of concept study.** *J Vet Intern Med* 2016; 30: 1138–1148.
- 108 Lanz OI. **Lumbosacral and pelvic injuries.** *Vet Clin North Am Small Anim Pract* 2002; 32: 949–962.
- 109 Might KR and Gregory CR. **Tenesmus and obstipation in a cat.** *Compend Contin Educ Vet* 2010; 32: E1–3.
- 110 Sordo L, Breheny C, Halls V, et al. **Prevalence of disease and age-related behavioural changes in cats: past and present.** *Vet Sci* 2020; 7: 85. DOI: 10.3390/vetsci7030085.
- 111 Landsberg G. **Behavior problems of older cats.** In: Schaumburg I (ed). *Proceedings of the 135th Annual Meeting of the American Veterinary Medical Association.* San Diego, CA, 1998, pp 317–320.
- 112 Gunn-Moore D, Moffat K, Christie L-A, et al. **Cognitive dysfunction and the neurobiology of ageing in cats.** *J Small Anim Pract* 2007; 48: 546–553.
- 113 Moffat K and Landsberg G. **An investigation of the prevalence of clinical signs of cognitive dysfunction syndrome (CDS) in cats [abstract].** *J Am Anim Hosp Assoc* 2003; 39: 512.
- 114 Bennett D and Morton C. **A study of owner observed behavioural and lifestyle changes in cats with musculoskeletal disease before and after analgesic therapy.** *J Feline Med Surg* 2009; 11: 997–1004.
- 115 Gunn-Moore D. **Cognitive dysfunction in the cat.** In: Little SE (ed). *August's consultations in feline internal medicine.* St Louis, MO: Saunders Elsevier, 2016, pp 977–985.
- 116 Haupt K, Levine E, Landsberg G, et al. **Anti-oxidant fortified food improves owner perceived behavior in the aging cat.** *Proceedings of the ESFM Feline Conference; 2007; Prague, Czech Republic.*
- 117 Pan Y, Araujo JA, Burrows J, et al. **Cognitive enhancement in middle-aged and old cats with dietary supplementation with a nutrient blend containing fish oil, B vitamins, antioxidants and arginine.** *Br J Nutr* 2013; 110: 40–49.
- 118 Araujo JA, Faubert ML, Brooks ML, et al. **NOVIFIT (NoviSAmE) tablets improve executive function in aged dog and cats: implications for treatment of cognitive dysfunction syndrome.** *Intern J Appl Res Vet Med* 2012; 10: 90–98.
- 119 Griffith CA, Steigerwald ES and Buffington CAT. **Effects of a synthetic facial pheromone on behavior of cats.** *J Am Vet Med Assoc* 2000; 217: 1154–1156.
- 120 Landsberg G. **Therapeutic options for cognitive decline in senior pets.** *J Am Anim Hosp Assoc* 2006; 42: 407–413.
- 121 Gunn-Moore DA. **Geriatric cats and cognitive dysfunction syndrome.** In: *Proceedings of the WSAVA Annual Congress, Dublin, Ireland, 2008.*
- 122 Puig J, Cattin I and Seth M. **Concurrent diseases in hyperthyroid cats undergoing assessment prior to radioiodine treatment.** *J Feline Med Surg* 2015; 17: 537–542.

- 123 Scherk M. **Why are comorbidities the 'new' norm for cats?** In: Proceedings of the American Association of Feline Practitioners 2019 Conference. San Francisco, CA, 2019, pp 71–76. Available at [catvets.com/senior-care](http://catvets.com/senior-care) (2019).
- 124 López-Otín C, Blasco MA, Partridge L, et al. **The hallmarks of aging.** *Cell* 2013; 153: 1194–1217.
- 125 Fulop T, Larbi A, Dupuis G, et al. **Immunosenescence and inflammation as two sides of the same coin: friends or foes?** *Front Immunol* 2018; 8. DOI: 10.3389/fimmu.2017.01960.
- 126 Belanger MC. **Concurrent disease management: heart failure and chronic kidney disease.** In: Little S (ed). *The cat: clinical medicine and management*. St Louis, MO: Saunders, 2012, p 1108.
- 127 Trevejo RT, Lefebvre SL, Yang M, et al. **Survival analysis to evaluate associations between periodontal disease and the risk of development of chronic azotemic kidney disease in cats evaluated at primary care veterinary hospitals.** *J Am Vet Med Assoc* 2018; 252: 710–720.
- 128 Finch NC, Syme HM and Elliott J. **Risk factors for development of chronic kidney disease in cats.** *J Vet Intern Med* 2016; 30: 602–610.
- 129 Hoenig M. **Concurrent disease management: hyperthyroidism and diabetes mellitus.** In: Little S (ed). *The cat: clinical medicine and management*. St Louis, MO: Saunders, 2012, p 1101.
- 130 Hoenig M. **Concurrent disease management: diabetes mellitus and obesity.** In: Little S (ed). *The cat: clinical medicine and management*. St Louis, MO: Saunders, 2012, p 110.
- 131 Pérez-López L, Boronat M, Melián C, et al. **Assessment of the association between diabetes mellitus and chronic kidney disease in adult cats.** *J Vet Intern Med* 2019; 33: 1921–1925.
- 132 Cook AK and Evans JB. **Feline comorbidities: recognition, diagnosis and management of the cushingoid diabetic.** *J Feline Med Surg* 2021; 23: 4–16.
- 133 Greco D. **Concurrent disease management: diabetes mellitus and feline lower urinary tract disorders.** In: Little S (ed). *The cat: clinical medicine and management*. St Louis MO: Saunders, 2012, p 1106.
- 134 Tarkosova D, Story MM, Rand JS, et al. **Feline obesity – prevalence, risk factors, pathogenesis, associated conditions and assessment: a review.** *Veterinarni Medicina* 2016; 61: 295–307.
- 135 Simpson KW. **Pancreatitis and triaditis in cats: causes and treatment.** *J Small Anim Pract* 2015; 56: 40–49.
- 136 Cerna P, Kilpatrick S and Gunn-Moore DA. **Feline comorbidities: what do we really know about feline triaditis?** *J Feline Med Surg* 2020; 22: 1047–1067.
- 137 Greene JP, Lefebvre SL, Wang M, et al. **Risk factors associated with the development of chronic kidney disease in cats evaluated at primary care veterinary hospitals.** *J Am Vet Med Assoc* 2014; 244: 320–327.
- 138 Saito E and Kleinhensz S. **Comorbidities in underweight cats.** *Vet Focus* 2017; 27.
- 139 Campigotto AJ, Poljak Z, Stone EA, et al. **Investigation of relationships between body weight and age among domestic cats stratified by breed and sex.** *J Am Vet Med Assoc* 2019; 255: 205–212.
- 140 Fotin M, Lapointe L, Hudon C, et al. **Multimorbidity and quality of life in primary care: a systematic review.** *Health Qual Life Outcomes* 2004; 2: 51. DOI: 10.1186/1477-7525-2-51.
- 141 Kukanich B. **Geriatric veterinary pharmacology.** *Vet Clin North Am Small Anim Pract* 2012; 42: 631–642.
- 142 Mansfield CS and Jones BR. **Review of feline pancreatitis part two: clinical signs, diagnosis and treatment.** *J Feline Med Surg* 2001; 3: 125–132.
- 143 Xenoulis PG, Suchodolski JS and Steiner JM. **Chronic pancreatitis in dogs and cats.** *Compend Contin Educ Vet* 2008; 30: 166–181.
- 144 Peterson ME and Gamble DA. **Effect of nonthyroidal illness on serum thyroxine concentrations in cats: 494 cases (1988).** *J Am Vet Med Assoc* 1990; 197: 1203–1208.
- 145 Wakeling J, Moore K, Elliott J, et al. **Diagnosis of hyperthyroidism in cats with mild chronic kidney disease.** *J Small Anim Pract* 2008; 49: 287–294.
- 146 Barnoski J, Lee-Fowler TM, Boothe DM, et al. **Serum theophylline after multiple dosing with transdermal gels in cats.** *J Feline Med Surg* 2019; 21: 329–334.
- 147 Eichstadt LR. **Compounding transdermal medication for feline patients.** *Int J Pharm Compd* 2016; 20: 271–274.
- 148 Naugle KM, Fillingim RB and Riley JL. **A meta-analytic review of the hypoalgesic effects of exercise.** *J Pain* 2012; 13: 1139–1150.
- 149 Whitehead K, Cortes Y and Eirmann L. **Gastrointestinal dysmotility disorders in critically ill dogs and cats.** *J Vet Emerg Crit Care* 2016; 26: 234–254.
- 150 Batchelor CEM and McKeegan DEF. **Survey of the frequency and perceived stressfulness of ethical dilemmas encountered in UK veterinary practice.** *Vet Rec* 2012; 170: 19. DOI: 10.1136/vr.100262.
- 151 Tatlock S, Gober M, Williamson N, et al. **Development and preliminary psychometric evaluation of an owner-completed measure of feline quality of life.** *Vet J* 2017; 228: 22–32.
- 152 FDA. **Patient-reported outcome measures: use in medical product development to support labeling claims: guidance for industry.** US Food & Drug Administration. <https://www.fda.gov/regulatory-information/search-fda-guidance-documents/patient-reported-outcome-measures-use-medical-product-development-support-labeling-claims> (2009, accessed September 19, 2020).
- 153 Spofford N, Lefebvre SL, McCune S, et al. **Should the veterinary profession invest in developing methods to assess quality of life in healthy dogs and cats?** *J Am Vet Med Assoc* 2013; 243: 952–956.
- 154 Noble CE, Wiseman-Orr LM, Scott ME, et al. **Development, initial validation and reliability testing of a web-based, generic feline health-related quality-of-life instrument.** *J Feline Med Surg* 2019; 21: 84–94.
- 155 Rioja-Lang F, Bacon H, Connor M, et al. **Determining priority welfare issues for cats in the United Kingdom using expert consensus.** *Vet Rec Open* 2019; 6. DOI: 10.1136/vetreco-2019-000365.
- 156 Meyer RE and Robertson SA. **Surveys and objectifying the subjective.** *Vet Anaes Analg* 2016; 43: 358–360.
- 157 Yeates J and Main D. **Assessment of companion animal quality of life in veterinary practice and research.** *J Small Anim Pract* 2009; 50: 274–281.
- 158 Scott EM, Nolan A, Reid J, et al. **Can we really measure animal quality of life? Methodologies for measuring quality of life in people and other animals.** *Anim Welf* 2007; 16: 16–24.
- 159 Bishop G, Cooney K, Cox S, et al. **2016 AAHA/IAAHPC end-of-life care guidelines.** *J Am Anim Hosp Assoc* 2016; 52: 341–356.
- 160 Noli C, Borio S, Varina A, et al. **Development and validation of a questionnaire to evaluate the Quality of Life of cats with skin disease and their owners, and its use in 185 cats with skin disease.** *Vet Dermatol* 2016; 27: 247–e58.
- 161 Goldberg KJ. **Goals of care: development and use of the serious veterinary illness conversation guide.** *Vet Clin North Am Small Anim Pract* 2019; 49: 399–415.
- 162 Grimm H, Bergadano A, Musk GC, et al. **Drawing the line in clinical treatment of companion animals: recommendations from an ethics working party.** *Vet Rec* 2018; 182: 664. DOI: 10.1136/vr.104559.
- 163 Cox S. **Anticipatory grief and preparation for pet loss.** In: Gardner M and McVety D (eds). *Treatment and care of the geriatric veterinary patient*. Wiley Blackwell, 2017, pp 311–315.
- 164 AAFP. **2021 AAFP end of life educational toolkit.** Available at: [catvets.com/endoflife](http://catvets.com/endoflife).

Disponible en ligne sur le site [jfms.com](http://jfms.com) et [catvets.com/senior-care](http://catvets.com/senior-care)

Lignes directrices pour la réutilisation des articles : [sagepub.co.uk/journals-permissions](http://sagepub.co.uk/journals-permissions)

# Les chats âgés ont des besoins particuliers

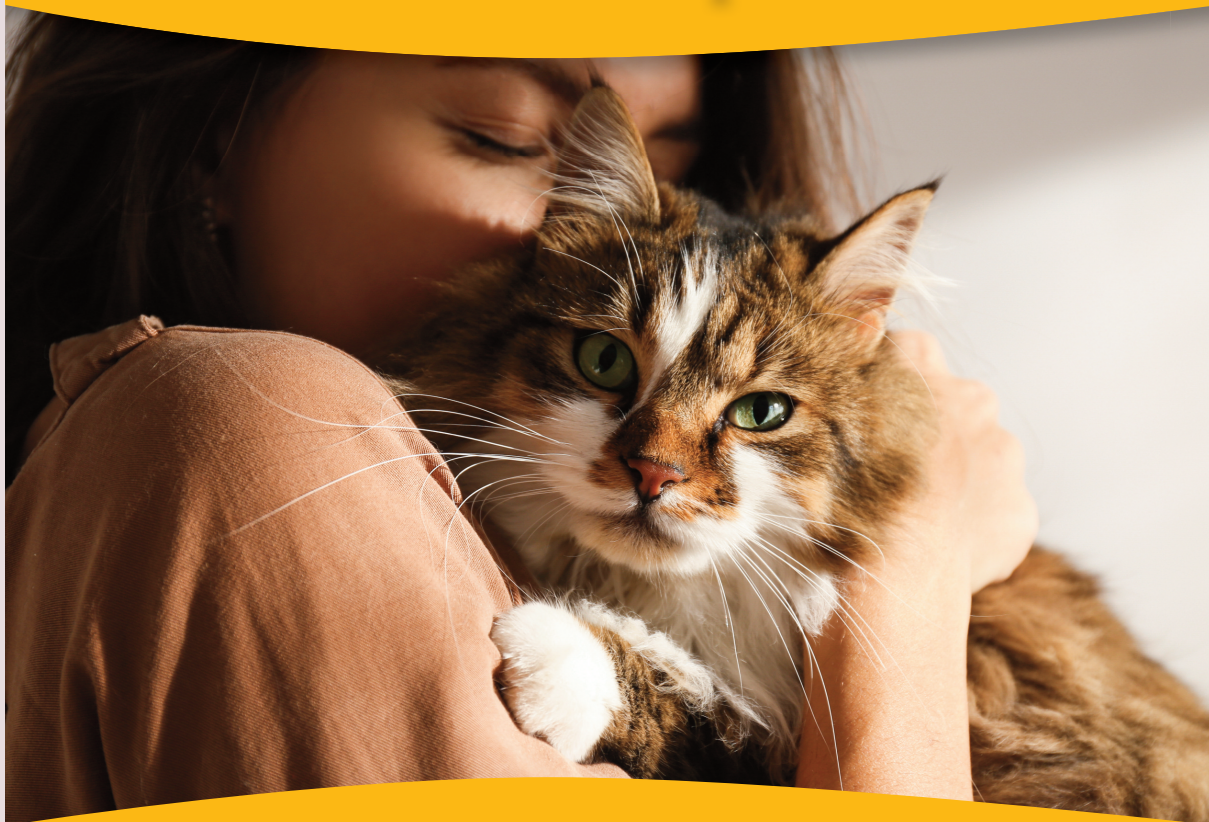

Nos chats peuvent vivre plus longtemps et mieux que jamais auparavant. Il est essentiel de comprendre l'évolution des besoins de votre chat âgé pour l'aider à vivre une vie longue et heureuse. En collaboration avec votre vétérinaire, vous pouvez offrir une bonne qualité de vie à votre chat âgé. S'occuper d'un chat âgé peut s'avérer être une expérience profondément enrichissante qui renforcera le lien unique et spécial que vous partagez avec lui.

#### QU'EST-CE QU'UN CHAT ÂGÉ ?

Les chats passent par quatre stades de vie : chaton, jeune adulte, adulte mature et chat âgé. Ils deviennent des chats âgés à 11 ans.

Les chats âgés ont des besoins très différents et il est utile de comprendre les changements physiques et émotionnels qui se produisent avec le vieillissement de votre chat.

Les changements courants liés à l'âge sont les suivants :

- Des changements dans le comportement et les habitudes de sommeil
- Une augmentation des « conversations » ou miaulements
- L'expression de douleurs liées au mouvement (sauter, utiliser les escaliers, entrer et sortir du bac à litière surélevé)
- Des changements dans la vue et l'ouïe
- Une diminution de l'odorat et du goût
- Une perte de poids et un relâchement cutané
- Des griffes cassantes ou nécessitant d'être coupées plus souvent
- Une diminution de la capacité d'absorption des nutriments et une augmentation des besoins en protéines.

Parrainé par

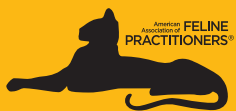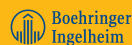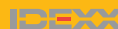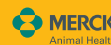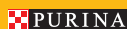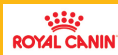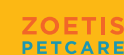

## Les chats âgés ont des besoins particuliers

La durée de vie d'un chat est cinq fois plus courte que celle d'un être humain. Les chats vieillissent donc plus rapidement que les humains. Un chat de 11 ans correspond à un humain d'environ 60 ans, mais un chat de 16 ans correspond à un humain de 80 ans. Nous faisons un bilan de santé une fois par an ; un nombre égal de bilans de santé pour un chat âgé en bonne santé serait effectué toutes les 10 à 11 semaines ! Étant donné que beaucoup de changements peuvent survenir en peu de temps, il est très important d'emmener votre chat âgé pour des contrôles réguliers.

### BILANS DE SANTÉ DES CHATS ÂGÉS

Les chats sont passés maîtres dans l'art de cacher les signes de maladie et de douleur, et peuvent paraître en bonne santé même s'ils sont malades ou ont mal. Pour bien prendre soin de son chat, des bilans de santé réguliers sont nécessaires. Les chats de 10 à 15 ans doivent consulter tous les 6 mois, et les chats de plus de 15 ans tous les 4 mois. Les chats ayant des problèmes de santé peuvent avoir besoin de bilans plus fréquents, selon leur maladie. Votre vétérinaire s'appuie sur les informations que vous lui fournissez sur les comportements de votre chat au quotidien pour identifier les signes de maladie, de douleur ou des changements de comportement.

Lors des bilans de santé, votre vétérinaire examinera de manière approfondie le poids de votre chat, sa bouche, ses dents, ses yeux, ses oreilles, sa glande thyroïde, son cœur, ses poumons, son estomac, ses articulations, ses muscles, ses ganglions lymphatiques, sa pression sanguine et la qualité de sa peau et de son pelage. Il vous parlera de vaccinations et de prévention des parasites en fonction du mode de vie de votre chat. Des analyses annuelles de sang et d'urine, semblables à celles de votre examen annuel, peuvent aider à découvrir des problèmes et à surveiller la santé de votre chat. Votre vétérinaire comparera les nouveaux résultats des analyses sanguines avec ceux des analyses précédentes et examinera les éventuels changements. Les bilans de santé permettent souvent d'identifier des maladies ou des problèmes de santé liés à l'âge avant qu'ils ne soient douloureux ou plus coûteux à prendre en charge.

### MON CHAT ÂGÉ SOUFFRE-T-IL ?

La douleur peut être difficile à percevoir, car les chats essaient de nous cacher les signes d'inconfort et de maladie. Votre vétérinaire est formé pour reconnaître les signes subtils de la douleur. L'arthrose féline, ou maladie dégénérative articulaire (MDA), est très courante chez les chats. Des études montrent que jusqu'à 92 % des chats sont atteints de MDA. Tout changement dans le comportement normal ou les habitudes de votre chat peut être un signe de douleur (pour en savoir plus, consultez le site [catfriendly.com/pain](http://catfriendly.com/pain)). Vous pouvez aider votre chat âgé en mettant à sa disposition des marches ou des rampes pour faciliter l'accès à ses espaces préférés, ainsi que des veilleuses pour l'aider à mieux voir dans l'obscurité. Pensez à mettre un bac à litière à entrée basse pour que les chats âgés puissent y entrer et en sortir plus facilement et pensez aux accessoires pour chats âgés, qui améliorent « l'accessibilité des lieux ».

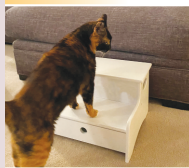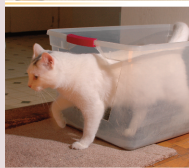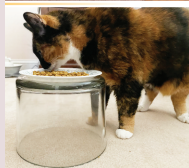

### GESTION DE LA NUTRITION ET DU POIDS

Il est crucial de maintenir votre chat âgé à un poids d'équilibre. Lors des bilans de santé, votre vétérinaire pèsera votre chat et palpera ses muscles. Ces paramètres permettent de déterminer le poids le plus sain et la condition physique de votre chat. Une prise ou une perte de poids progressive est difficile à percevoir. Vous pouvez peser votre chat à la maison à l'aide d'un pese-personne pour les petits poids (pèse-bébé, par exemple) et signaler à votre vétérinaire toute prise ou perte de poids.

Les chats âgés risquent de maigrir en raison de la diminution de leurs sens, le goût et/ou l'odorat, ce qui peut entraîner un manque d'intérêt pour la nourriture. Les chats en surpoids sont plus susceptibles de développer du diabète, de l'arthrose (MDA), des maladies cardiaques et des maladies du bas appareil urinaire.

Parrainé par

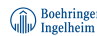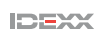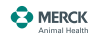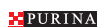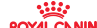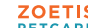

Si vous avez des difficultés à faire manger votre chat, demandez à votre vétérinaire de vérifier que votre chat n'est pas malade. Si votre chat est en bonne santé, essayez de lui proposer une nourriture de texture différente (par exemple, une nourriture sous forme de mousse au lieu de morceaux), de la nourriture à l'odeur forte, des aliments humides réchauffés ou réfrigérés, ou de la nourriture fraîche qui n'est pas restée à l'air trop longtemps, proposée plusieurs fois dans la journée. Certains chats aiment en petites quantités les arômes, comme le jus de thon en boîte ou le bouillon non assaisonné à faible teneur en sodium. Placez la nourriture là où votre chat passe le plus de temps et dans un endroit où il peut manger tranquillement et calmement. Il se peut que les chats âgés préfèrent des bols de nourriture et d'eau larges et bas qui ne touchent pas leurs moustaches. Utiliser des bols surélevés peut aider les chats qui ont du mal à se pencher pour manger. L'hydratation est très importante pour les chats âgés. Pensez à prévoir plusieurs points d'eau et demandez à votre vétérinaire quels aliments ou suppléments peuvent augmenter sa consommation d'eau.

### PRISE EN CHARGE DES MALADIES ET AFFECTIONS

De nombreuses maladies et affections, et parfois plusieurs à la fois, peuvent survenir au fur et à mesure que votre chat vieillit. Si vous constatez un changement dans le comportement et les habitudes de votre chat, alertez votre vétérinaire. Les maladies les plus courantes chez les chats âgés sont l'arthrose (MDA), le cancer, les maladies rénales chroniques, le diabète, les maladies dentaires, les maladies gastro-intestinales, l'hypertension, les maladies thyroïdiennes et le syndrome de dysfonctionnement cognitif (affectant la mémoire et la conscience). Les signes généraux de la maladie, pouvant être difficiles à percevoir au début, peuvent être les suivants :

- La consommation de plus ou moins d'eau, et/ou la production de plus grandes quantités d'urine
- Les nausées, les vomissements ou la constipation
- Une diminution de l'appétit, une perte de poids ou une perte de masse musculaire
- Une fourrure/un pelage de mauvaise qualité et une diminution du toilettage.
- Des changements de comportements, notamment une hyperactivité (activité inhabituelle), une fatigue, de l'anxiété, ou le refus d'utiliser la litière, des changements dans les habitudes de sommeil et les lieux de repos.
- Un gonflement anormal ou des masses cutanées (bosses ou excroissances inhabituelles)
- Des plaies qui ne guérissent pas, des saignements ou des écoulements.
- De la difficulté à respirer, à uriner ou à faire ses besoins.

La prise en charge des maladies peut être stressante tant pour vous que pour votre chat. Votre vétérinaire discutera avec vous d'un plan de traitement et de prise en charge. Discutez de vos préoccupations, de vos idées et de votre capacité à suivre les recommandations afin de créer un plan qui réduit au minimum la douleur et le stress de votre chat. Avoir recours à des bilans réguliers constitue le meilleur moyen de surveiller la santé, la douleur et la qualité de vie de votre chat.

### QUALITÉ DE VIE ET DÉCISIONS DE FIN DE VIE

Même avec des soins et des traitements vétérinaires réguliers, de nombreux chats âgés atteignent un stade où leur qualité de vie est gravement affectée par la maladie ou la douleur. Lorsque votre chat atteint ce stade, discutez avec votre vétérinaire de la meilleure marche à suivre. Vous travaillerez alors ensemble sur une évaluation de la qualité de vie réalisée à partir de questions, qui peut vous aider à déterminer les prochaines étapes.

Votre vétérinaire peut vous soutenir, vous et votre chat, pendant les soins de fin de vie, vous fournir des soins palliatifs et vous enseigner des moyens d'aider votre chat à se sentir bien pendant les derniers stades de la maladie. Si l'euthanasie est nécessaire, votre vétérinaire vous aidera à comprendre ce à quoi vous devez vous attendre pendant et après sa réalisation. Se préparer à cette expérience ne vous épargnera pas la douleur et le chagrin, mais contribuera à un cheminement plus apaisé et mieux compris. Pour en savoir plus, consultez le site [catfriendly.com/end-of-life](http://catfriendly.com/end-of-life).

**Vous êtes un membre important de l'équipe soignante de votre chat. Vous contribuez à la réussite des traitements et à l'amélioration des soins de santé pour votre chat.**

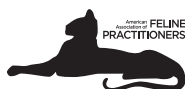

[www.catvets.com](http://www.catvets.com)

**Pour plus d'informations sur les chats âgés, consultez le site [www.catfriendly.com/senior](http://www.catfriendly.com/senior).**

© Copyright 2021 AAFP. Tous droits réservés.

La brochure destinée aux clients peut être téléchargée sur [catvets.com/client-brochures](http://catvets.com/client-brochures), et est également disponible comme document supplémentaire sur [jfms.com](http://jfms.com). DOI : 10.1177/1098612X211021538
