# Supplementary material
Source: PubMed Central journal article supplement (PMC10812122)
Supplement: sj-pdf-8-jfm-10.1177_1098612X211021538.pdf [file sj-pdf-8-jfm-10.1177_1098612X211021538.pdf]

# Les chats âgés ont des besoins particuliers

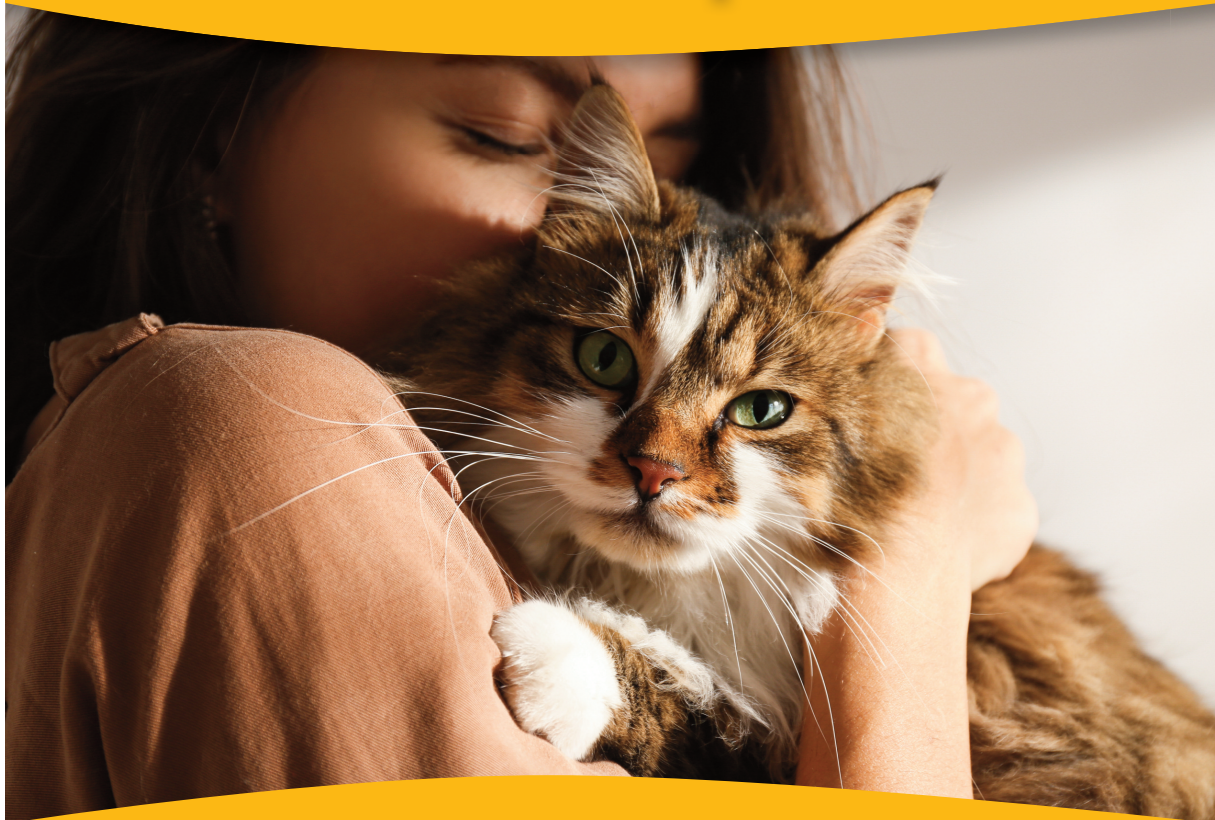

Nos chats peuvent vivre plus longtemps et mieux que jamais auparavant. Il est essentiel de comprendre l'évolution des besoins de votre chat âgé pour l'aider à vivre une vie longue et heureuse. En collaboration avec votre vétérinaire, vous pouvez offrir une bonne qualité de vie à votre chat âgé. S'occuper d'un chat âgé peut s'avérer être une expérience profondément enrichissante qui renforcera le lien unique et spécial que vous partagez avec lui.

#### QU'EST-CE QU'UN CHAT ÂGÉ ?

Les chats passent par quatre stades de vie : chaton, jeune adulte, adulte mature et chat âgé. Ils deviennent des chats âgés à 11 ans.

Les chats âgés ont des besoins très différents et il est utile de comprendre les changements physiques et émotionnels qui se produisent avec le vieillissement de votre chat.

Les changements courants liés à l'âge sont les suivants :

- Des changements dans le comportement et les habitudes de sommeil
- Une augmentation des « conversations » ou miaulements
- L'expression de douleurs liées au mouvement (sauter, utiliser les escaliers, entrer et sortir du bac à litière surélevé)
- Des changements dans la vue et l'ouïe
- Une diminution de l'odorat et du goût
- Une perte de poids et un relâchement cutané
- Des griffes cassantes ou nécessitant d'être coupées plus souvent
- Une diminution de la capacité d'absorption des nutriments et une augmentation des besoins en protéines.

Parrainé par

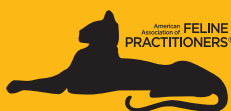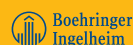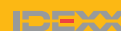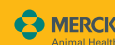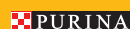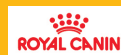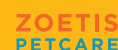

## Les chats âgés ont des besoins particuliers

La durée de vie d'un chat est cinq fois plus courte que celle d'un être humain. Les chats vieillissent donc plus rapidement que les humains. Un chat de 11 ans correspond à un humain d'environ 60 ans, mais un chat de 16 ans correspond à un humain de 80 ans. Nous faisons un bilan de santé une fois par an ; un nombre égal de bilans de santé pour un chat âgé en bonne santé serait effectué toutes les 10 à 11 semaines ! Étant donné que beaucoup de changements peuvent survenir en peu de temps, il est très important d'emmener votre chat âgé pour des contrôles réguliers.

### BILANS DE SANTÉ DES CHATS ÂGÉS

Les chats sont passés maîtres dans l'art de cacher les signes de maladie et de douleur, et peuvent paraître en bonne santé même s'ils sont malades ou ont mal. Pour bien prendre soin de son chat, des bilans de santé réguliers sont nécessaires. Les chats de 10 à 15 ans doivent consulter tous les 6 mois, et les chats de plus de 15 ans tous les 4 mois. Les chats ayant des problèmes de santé peuvent avoir besoin de bilans plus fréquents, selon leur maladie. Votre vétérinaire s'appuie sur les informations que vous lui fournissez sur les comportements de votre chat au quotidien pour identifier les signes de maladie, de douleur ou des changements de comportement.

Lors des bilans de santé, votre vétérinaire examinera de manière approfondie le poids de votre chat, sa bouche, ses dents, ses yeux, ses oreilles, sa glande thyroïde, son cœur, ses poumons, son estomac, ses articulations, ses muscles, ses ganglions lymphatiques, sa pression sanguine et la qualité de sa peau et de son pelage. Il vous parlera de vaccinations et de prévention des parasites en fonction du mode de vie de votre chat. Des analyses annuelles de sang et d'urine, semblables à celles de votre examen annuel, peuvent aider à découvrir des problèmes et à surveiller la santé de votre chat. Votre vétérinaire comparera les nouveaux résultats des analyses sanguines avec ceux des analyses précédentes et examinera les éventuels changements. Les bilans de santé permettent souvent d'identifier des maladies ou des problèmes de santé liés à l'âge avant qu'ils ne soient douloureux ou plus coûteux à prendre en charge.

### MON CHAT ÂGÉ SOUFFRE-T-IL ?

La douleur peut être difficile à percevoir, car les chats essaient de nous cacher les signes d'inconfort et de maladie. Votre vétérinaire est formé pour reconnaître les signes subtils de la douleur. L'arthrose féline, ou maladie dégénérative articulaire (MDA), est très courante chez les chats. Des études montrent que jusqu'à 92 % des chats sont atteints de MDA. Tout changement dans le comportement normal ou les habitudes de votre chat peut être un signe de douleur (pour en savoir plus, consultez le site [catfriendly.com/pain](http://catfriendly.com/pain)). Vous pouvez aider votre chat âgé en mettant à sa disposition des marches ou des rampes pour faciliter l'accès à ses espaces préférés, ainsi que des veilleuses pour l'aider à mieux voir dans l'obscurité. Pensez à mettre un bac à litière à entrée basse pour que les chats âgés puissent y entrer et en sortir plus facilement et pensez aux accessoires pour chats âgés, qui améliorent « l'accessibilité des lieux ».

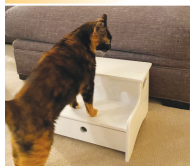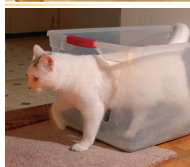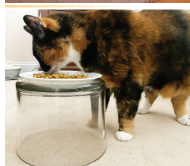

### GESTION DE LA NUTRITION ET DU POIDS

Il est crucial de maintenir votre chat âgé à un poids d'équilibre. Lors des bilans de santé, votre vétérinaire pèsera votre chat et palpera ses muscles. Ces paramètres permettent de déterminer le poids le plus sain et la condition physique de votre chat. Une prise ou une perte de poids progressive est difficile à percevoir. Vous pouvez peser votre chat à la maison à l'aide d'un pèse-personne pour les petits poids (pèse-bébé, par exemple) et signaler à votre vétérinaire toute prise ou perte de poids.

Les chats âgés risquent de maigrir en raison de la diminution de leurs sens, le goût et/ou l'odorat, ce qui peut entraîner un manque d'intérêt pour la nourriture. Les chats en surpoids sont plus susceptibles de développer du diabète, de l'arthrose (MDA), des maladies cardiaques et des maladies du bas appareil urinaire.

Parrainé par

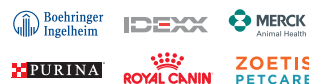

Si vous avez des difficultés à faire manger votre chat, demandez à votre vétérinaire de vérifier que votre chat n'est pas malade. Si votre chat est en bonne santé, essayez de lui proposer une nourriture de texture différente (par exemple, une nourriture sous forme de mousse au lieu de morceaux), de la nourriture à l'odeur forte, des aliments humides réchauffés ou réfrigérés, ou de la nourriture fraîche qui n'est pas restée à l'air trop longtemps, proposée plusieurs fois dans la journée. Certains chats aiment en petites quantités les arômes, comme le jus de thon en boîte ou le bouillon non assaisonné à faible teneur en sodium. Placez la nourriture là où votre chat passe le plus de temps et dans un endroit où il peut manger tranquillement et calmement. Il se peut que les chats âgés préfèrent des bols de nourriture et d'eau larges et bas qui ne touchent pas leurs moustaches. Utilisez des bols surélevés peut aider les chats qui ont du mal à se pencher pour manger. L'hydratation est très importante pour les chats âgés. Pensez à prévoir plusieurs points d'eau et demandez à votre vétérinaire quels aliments ou suppléments peuvent augmenter sa consommation d'eau.

### PRISE EN CHARGE DES MALADIES ET AFFECTIONS

De nombreuses maladies et affections, et parfois plusieurs à la fois, peuvent survenir au fur et à mesure que votre chat vieillit. Si vous constatez un changement dans le comportement et les habitudes de votre chat, alertez votre vétérinaire. Les maladies les plus courantes chez les chats âgés sont l'arthrose (MDA), le cancer, les maladies rénales chroniques, le diabète, les maladies dentaires, les maladies gastro-intestinales, l'hypertension, les maladies thyroïdiennes et le syndrome de dysfonctionnement cognitif (affectant la mémoire et la conscience). Les signes généraux de la maladie, pouvant être difficiles à percevoir au début, peuvent être les suivants :

- La consommation de plus ou moins d'eau, et/ou la production de plus grandes quantités d'urine
- Les nausées, les vomissements ou la constipation
- Une diminution de l'appétit, une perte de poids ou une perte de masse musculaire
- Une fourrure/un pelage de mauvaise qualité et une diminution du toilettage.
- Des changements de comportements, notamment une hyperactivité (activité inhabituelle), une fatigue, de l'anxiété, ou le refus d'utiliser la litière, des changements dans les habitudes de sommeil et les lieux de repos.
- Un gonflement anormal ou des masses cutanées (bosses ou excroissances inhabituelles)
- Des plaies qui ne guérissent pas, des saignements ou des écoulements.
- De la difficulté à respirer, à uriner ou à faire ses besoins.

La prise en charge des maladies peut être stressante tant pour vous que pour votre chat. Votre vétérinaire discutera avec vous d'un plan de traitement et de prise en charge. Discutez de vos préoccupations, de vos idées et de votre capacité à suivre les recommandations afin de créer un plan qui réduit au minimum la douleur et le stress de votre chat. Avoir recours à des bilans réguliers constitue le meilleur moyen de surveiller la santé, la douleur et la qualité de vie de votre chat.

### QUALITÉ DE VIE ET DÉCISIONS DE FIN DE VIE

Même avec des soins et des traitements vétérinaires réguliers, de nombreux chats âgés atteignent un stade où leur qualité de vie est gravement affectée par la maladie ou la douleur. Lorsque votre chat atteint ce stade, discutez avec votre vétérinaire de la meilleure marche à suivre. Vous travaillerez alors ensemble sur une évaluation de la qualité de vie réalisée à partir de questions, qui peut vous aider à déterminer les prochaines étapes.

Votre vétérinaire peut vous soutenir, vous et votre chat, pendant les soins de fin de vie, vous fournir des soins palliatifs et vous enseigner des moyens d'aider votre chat à se sentir bien pendant les derniers stades de la maladie. Si l'euthanasie est nécessaire, votre vétérinaire vous aidera à comprendre ce à quoi vous devez vous attendre pendant et après sa réalisation. Se préparer à cette expérience ne vous épargnera pas la douleur et le chagrin, mais contribuera à un cheminement plus apaisé et mieux compris. Pour en savoir plus, consultez le site [catfriendly.com/end-of-life](http://catfriendly.com/end-of-life).

**Vous êtes un membre important de l'équipe soignante de votre chat. Vous contribuez à la réussite des traitements et à l'amélioration des soins de santé pour votre chat.**

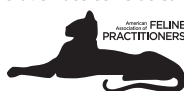

[www.catvets.com](http://www.catvets.com)

**Pour plus d'informations sur les chats âgés, consultez le site [www.catfriendly.com/senior](http://www.catfriendly.com/senior).**

© Copyright 2021 AAFP. Tous droits réservés.

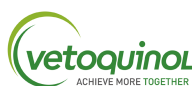

This translation was generously provided by Vetoquinol and SFMF.

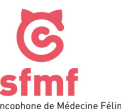

### Avis de non-responsabilité

Cette publication est une traduction complète et fidèle de la version originale en langue anglaise. Les auteurs, les éditeurs, les sociétés (AAFP et ISFM) et l'éditeur (SAGE Publications) n'acceptent aucune responsabilité légale pour les erreurs ou omissions qui pourraient être commises dans cette traduction. Les sociétés et l'éditeur ne donnent aucune garantie, expresse ou implicite, concernant le matériel contenu dans ce document et n'acceptent aucune responsabilité pour toute erreur commise lors de la traduction de l'article.
